# Supplementary material for: Metabolic Reconstruction for Metagenomic Data and Its Application to the Human Microbiome
Source: PubMed Central journal article supplement (PMC3374609; doi:10.1371/journal.pcbi.1002358), 2012-06-13

Correlation (asin sqrt)

### Abundance

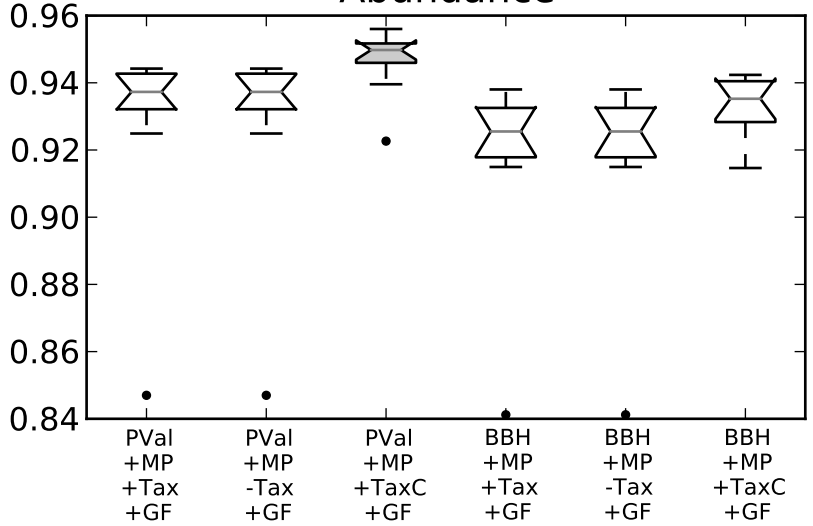

### Coverage

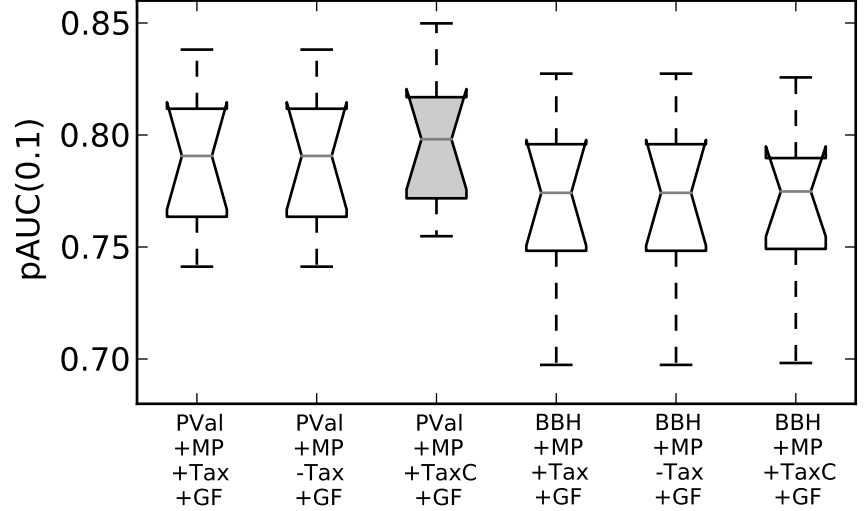

Supplement: pcbi.1002358.s004.pdf [file pcbi.1002358.s004.pdf]
