# Supplementary material for: Metabolic Reconstruction for Metagenomic Data and Its Application to the Human Microbiome
Source: PLoS Comput Biol. 2012 Jun 13;8(6):e1002358. doi: 10.1371/journal.pcbi.1002358 (PMC3374609; doi:10.1371/journal.pcbi.1002358)
Supplement: Table S1 — Significant associations between microbial function and host phenotype in seven habitats of the human microbiome. Each row reports a significant body-site-specific association between microbial functional module abundance and host metadata, including biometrics (gender, BMI, etc.) as well as sample processing (e.g. sequence depth). P-values were calculated using Spearman's r for continuous metadata and the Kruskal-Wallis nonparametric ANOVA for categorical features as reported in the Methods, with Q-values representing a Benjamini-Hochberg false discovery rate correction for multiple hypothesis tests. (XLSX) [file pcbi.1002358.s006.xlsx]

## Sheet: humann-mpm-abd_subset
Body site	Functional module	dbGaP metadata variable	Total N	N>0	P-value	Q-value
Posterior_fornix	M00222: Phosphate transport system	DVDPFPH	53	53	3.58682e-10	4.14278e-06
Posterior_fornix	M00277: PTS system, N-acetylgalactosamine-specific II component	DVDPFPH	47	27	1.14693e-08	6.62353e-05
Posterior_fornix	M00239: Peptides/nickel transport system	DVDPFPH	53	53	1.04453e-07	0.000402146
Posterior_fornix	M00007: Pentose phosphate pathway, non-oxidative phase, fructose 6P => ribose 5P	DVDPFPH	48	43	2.3605e-07	0.000681595
Posterior_fornix	M00222: Phosphate transport system	DVDINTPH	53	53	1.42232e-05	0.0328556
Posterior_fornix	M00277: PTS system, N-acetylgalactosamine-specific II component	DVDINTPH	47	27	1.49405e-05	0.0287605
Posterior_fornix	M00175: Nitrogen fixation, N2 => ammonia	DVDPFPH	53	34	2.59327e-05	0.0427889
Retroauricular_crease	M00199: Lactose/L-arabinose transport system	DTPSYSTL	26	26	2.72001e-05	0.0392702
Posterior_fornix	M00016: Lysine biosynthesis, aspartate => lysine	DVDPFPH	53	45	3.72036e-05	0.0477446
Posterior_fornix	M00007: Pentose phosphate pathway, non-oxidative phase, fructose 6P => ribose 5P	DVDINTPH	48	43	4.94859e-05	0.0571562
Posterior_fornix	M00004: Pentose phosphate pathway (Pentose phosphate cycle)	DVDPFPH	51	46	5.40576e-05	0.0567605
Stool	M00246: Nickel transport system	DTPDIAST	135	83	5.79424e-05	0.0557696
Retroauricular_crease	M00016: Lysine biosynthesis, aspartate => lysine	DTPBMI	24	24	6.98494e-05	0.0620585
Retroauricular_crease	M00185: Sulfate transport system	DTPBMI	26	26	7.56688e-05	0.0624268
Posterior_fornix	M00198: sn-Glycerol 3-phosphate transport system	DVDPFPH	53	53	9.24454e-05	0.071183
Stool	M00046: beta-Alanine biosynthesis, cytosine / uracil => beta-alanine	study_day	135	135	9.35155e-05	0.0675065
Stool	M00035: Methionine degradation	DTPPULSE	136	136	9.51452e-05	0.0646428
Posterior_fornix	M00175: Nitrogen fixation, N2 => ammonia	DVDINTPH	53	34	0.000120985	0.0776321
Posterior_fornix	M00004: Pentose phosphate pathway (Pentose phosphate cycle)	DVDINTPH	51	46	0.000158165	0.0961475
Retroauricular_crease	M00170: C4-dicarboxylic acid cycle, phosphoenolpyruvate carboxykinase type	DTPBMI	23	23	0.000208291	0.120288
Retroauricular_crease	M00065: GPI-anchor biosynthesis, core oligosaccharide	DVDTMPF	24	11	0.000248296	0.136563
Stool	M00096: C5 isoprenoid biosynthesis, non-mevalonate pathway	DVDINTPH	136	136	0.000258701	0.135818
Supragingival_plaque	M00036: Leucine degradation, leucine => acetoacetate + acetyl-CoA	Number of Quality Bases	115	115	0.00028262	0.141925
Retroauricular_crease	M00232: General L-amino acid transport system	DVDTMPF	26	22	0.000290103	0.139612
Posterior_fornix	M00185: Sulfate transport system	DTPDIAST	50	28	0.000293473	0.135585
Supragingival_plaque	M00229: Arginine transport system	DVDPFPH	112	112	0.000321416	0.142783
Retroauricular_crease	M00311: 2-oxoglutarate:ferredoxin oxidoreductase	DTPBMI	25	16	0.000342181	0.146377
Posterior_fornix	M00239: Peptides/nickel transport system	DVDINTPH	53	53	0.000345454	0.1425
Tongue_dorsum	M00225: Lysine/arginine/ornithine transport system	Number of Quality Bases	123	123	0.000351053	0.139816
Anterior_nares	M00083: Fatty acid biosynthesis, elongation	Number of Quality Bases	87	87	0.000365303	0.140642
Retroauricular_crease	M00168: CAM (Crassulacean acid metabolism), dark	AGEENR	25	25	0.000433408	0.161479
Supragingival_plaque	M00003: Gluconeogenesis, oxaloacetate => fructose-6P	AGEENR	114	114	0.00045772	0.165208
Posterior_fornix	M00299: Spermidine/putrescine transport system	DTPDIAST	50	50	0.000526144	0.18415
Posterior_fornix	M00120: Coenzyme A biosynthesis, pantothenate => CoA	DVDPFPH	53	53	0.00053333	0.181175
Anterior_nares	M00245: Cobalt transport system	DTPHTIN	87	77	0.000539529	0.178045
Retroauricular_crease	M00089: Triacylglycerol biosynthesis	AGEENR	26	26	0.000551156	0.176829
Retroauricular_crease	M00366: C10-C20 isoprenoid biosynthesis, plants	AGEENR	26	22	0.000568455	0.17745
Supragingival_plaque	M00019: Leucine biosynthesis, pyruvate => 2-oxoisovalerate => leucine	DVDPFPH	115	115	0.000586575	0.178288
Retroauricular_crease	M00027: GABA (gamma-Aminobutyrate) shunt	AGEENR	26	26	0.000614659	0.182033
Supragingival_plaque	M00202: Oligogalacturonide transport system	Number of Quality Bases	115	115	0.000687133	0.19841
Stool	M00135: GABA biosynthesis, eukaryotes, putrescine => GABA	Number of Quality Bases	136	136	0.000751922	0.211822
Stool	M00115: NAD biosynthesis, aspartate => NAD	DTPBMI	136	136	0.000760132	0.209036
Posterior_fornix	M00270: PTS system, trehalose-specific II component	DTPWTLB	52	51	0.00081395	0.218631
Tongue_dorsum	M00061: Uronic acid metabolism	DTPBMI	123	123	0.00088033	0.231087
Stool	M00035: Methionine degradation	DVDINTPH	136	136	0.000928338	0.238273
Tongue_dorsum	M00232: General L-amino acid transport system	Number of Quality Bases	123	123	0.000928498	0.233134
