# Supplementary material for: Metabolic Reconstruction for Metagenomic Data and Its Application to the Human Microbiome
Source: PLoS Comput Biol. 2012 Jun 13;8(6):e1002358. doi: 10.1371/journal.pcbi.1002358 (PMC3374609; doi:10.1371/journal.pcbi.1002358)
Supplement: Table S2 — Community composition of four synthetic metagenomes used to evaluate performance of metabolic reconstruction. Microbes for the low-complexity (20 organism) community weree hand-chosen from clades representative of the human microbiome. Their relative abundances in the staggered community were likewise chosen to be roughly representative of physiological occurrence rates. Organisms in the high-complexity (100 organism) synthetic community were randomly selected from KEGG high-quality manually curated finished genomes. Their abundances in the staggered community were randomly generated from a lognormal distribution. These synthetic community designs for computational performance evaluation were inspired by those of [31] as adapted to the complexity and phylogeny of the human microbiome. (XLSX) [file pcbi.1002358.s007.xlsx]

## Sheet: Sheet1
KEGG ID	Definition	Abundance	Relative abundance
Low-complexity
bth	Bacteroides thetaiotaomicron VPI-5482	0.5	0.569217
lac	Lactobacillus acidophilus NCFM	0.1	0.113843
pgi	Porphyromonas gingivalis W83	0.05	0.0569217
pdi	Parabacteroides distasonis ATCC 8503	0.05	0.0569217
nme	Neisseria meningitidis MC58 (serogroup B)	0.05	0.0569217
cje	Campylobacter jejuni subsp. jejuni NCTC 11168	0.05	0.0569217
pru	Prevotella ruminicola 23	0.02	0.0227687
vpr	Veillonella parvula DSM 2008	0.01	0.0113843
bma	Burkholderia mallei ATCC 23344	0.01	0.0113843
pmu	Pasteurella multocida PM70	0.01	0.0113843
fjo	Flavobacterium johnsoniae UW101	0.01	0.0113843
lba	Leptotrichia buccalis DSM 1135	0.01	0.0113843
rmu	Rothia mucilaginosa DY-18	0.005	0.00569217
eel	Eubacterium eligens ATCC 27750	0.001	0.00113843
sau	Staphylococcus aureus subsp. aureus N315, hospital-acquired	0.001	0.00113843
eco	Escherichia coli K-12 MG1655	0.001	0.00113843
blo	Bifidobacterium longum NCC2705	0.0001	0.000113843
fnu	Fusobacterium nucleatum ATCC 25586	0.0001	0.000113843
spn	Streptococcus pneumoniae TIGR4 (virulent serotype 4)	0.0001	0.000113843
cdf	Clostridium difficile 630 (PCR-ribotype 012)	0.0001	0.000113843
High-complexity
pla	Parvibaculum lavamentivorans DS-1	164.932	0.288856
mfl	Mesoplasma florum L1	35.0582	0.0613995
cdf	Clostridium difficile 630 (PCR-ribotype 012)	32.7639	0.0573814
ecj	Cryptomeria japonica (Japanese cedar) (EST)	24.1031	0.0422132
pdi	Parabacteroides distasonis ATCC 8503	23.773	0.0416351
pmi	Prochlorococcus marinus MIT 9312	20.7594	0.0363572
gfo	Gramella forsetii KT0803	20.4224	0.0357669
pmc	Prochlorococcus marinus MIT 9515	20.1353	0.0352641
llm	Lactococcus lactis subsp. cremoris MG1363	18.2647	0.0319881
fjo	Flavobacterium johnsoniae UW101	14.7267	0.0257917
ngo	Neisseria gonorrhoeae FA 1090	13.8934	0.0243324
saf	Sulfurihydrogenibium azorense Az-Fu1	13.6697	0.0239405
lbj	Leptospira borgpetersenii serovar Hardjo-bovis JB197	12.9677	0.022711
bth	Bacteroides thetaiotaomicron VPI-5482	10.6902	0.0187224
noc	Nitrosococcus oceani ATCC 19707	9.05495	0.0158585
sse	Shewanella sediminis HAW-EB3	8.98423	0.0157346
esi	Exiguobacterium sibiricum 255-15	7.20453	0.0126177
hin	Haemophilus influenzae Rd KW20 (serotype d)	6.78872	0.0118895
bcn	Burkholderia cenocepacia AU 1054	6.71092	0.0117532
gka	Geobacillus kaustophilus HTA426	6.33564	0.011096
lac	Lactobacillus acidophilus NCFM	6.22995	0.0109109
fno	Fervidobacterium nodosum Rt17-B1	5.63831	0.00987471
syf	Synechococcus elongatus PCC 7942	5.31964	0.00931661
ppd	Pelobacter propionicus DSM 2379	5.03613	0.00882008
ppf	Pseudomonas putida F1	4.6494	0.00814277
bml	Burkholderia mallei NCTC 10229	4.3032	0.00753646
dra	Deinococcus radiodurans R1	4.28304	0.00750115
kpe	Klebsiella pneumoniae 342	3.28666	0.00575612
bur	Burkholderia sp. 383	3.26504	0.00571826
rmu	Rothia mucilaginosa DY-18	3.25405	0.00569902
syw	Synechococcus sp. WH 8102	3.2332	0.00566251
cje	Campylobacter jejuni subsp. jejuni NCTC 11168	2.79426	0.00489375
pmu	Pasteurella multocida PM70	2.7857	0.00487876
taf	Thermosipho africanus TCF52B	2.77608	0.00486192
bmv	Burkholderia mallei SAVP1	2.76647	0.00484508
pmm	Prochlorococcus marinus MED4 (subsp. pastoris str. CCMP1378)	2.54885	0.00446395
ilo	Idiomarina loihiensis L2TR	2.52788	0.00442722
slp	Syntrophothermus lipocalidus DSM 12680	2.34868	0.00411338
ava	Anabaena variabilis ATCC 29413	2.16793	0.00379683
ret	Rhizobium etli CFN 42	2.11856	0.00371036
mbo	Mycobacterium bovis subsp. bovis AF2122/97	2.1048	0.00368625
bad	Bifidobacterium adolescentis ATCC 15703	1.96511	0.00344162
fth	Francisella tularensis subsp. holarctica OSU18	1.79205	0.00313853
paa	Prosthecochloris aestuarii DSM 271	1.38656	0.00242837
blo	Bifidobacterium longum NCC2705	1.20494	0.00211028
rma	Candidatus Ruthia magnifica Cm, endosymbiont of Calyptogena	1.20369	0.00210809
btk	Bacillus thuringiensis 97-27 (serovar konkukian)	1.08201	0.00189499
ban	Bacillus anthracis Ames	1.04154	0.00182411
oih	Oceanobacillus iheyensis HTE831	1.0408	0.00182282
cbo	Clostridium botulinum A ATCC 3502	1.03307	0.00180928
spm	Streptococcus pyogenes MGAS8232 (serotype M18)	0.931383	0.00163119
rfe	Rickettsia felis URRWXCal2	0.71717	0.00125602
pal	Candidatus Phytoplasma australiense	0.697881	0.00122224
pca	Pelobacter carbinolicus DSM 2380	0.671357	0.00117579
pgi	Porphyromonas gingivalis W83	0.665246	0.00116508
cba	Clostridium botulinum A ATCC 19397	0.651597	0.00114118
eco	Escherichia coli K-12 MG1655	0.635058	0.00111221
chl	Chloroflexus sp. Y-400-fl	0.627261	0.00109856
lbr	Lactobacillus brevis ATCC 367	0.603993	0.00105781
sme	Sinorhizobium meliloti 1021	0.486187	0.000851488
vpa	Vibrio parahaemolyticus RIMD 2210633	0.473999	0.000830143
hso	Haemophilus somnus (Histophilus somni) 129PT	0.441831	0.000773805
shw	Shewanella sp. W3-18-1	0.42633	0.000746657
mbb	Mycobacterium bovis BCG Pasteur 1173P2	0.414005	0.000725072
mpt	Methylibium petroleiphilum PM1	0.406113	0.000711251
sav	Staphylococcus aureus subsp. aureus Mu50, MRSA strain with	0.370872	0.000649531
pmf	Prochlorococcus marinus MIT 9303	0.361077	0.000632376
lba	Leptotrichia buccalis DSM 1135	0.351653	0.00061587
ypn	Yersinia pestis Nepal516 (biovar Antiqua)	0.318564	0.00055792
amt	Alkaliphilus metalliredigens QYMF	0.292744	0.000512701
ote	Opitutus terrae PB90-1	0.274207	0.000480236
kpu	Klebsiella pneumoniae NTUH-K2044	0.266633	0.000466971
amr	Acaryochloris marina MBIC11017	0.263608	0.000461672
pru	Prevotella ruminicola 23	0.260124	0.00045557
hpj	Helicobacter pylori J99	0.256097	0.000448518
sfr	Shewanella frigidimarina NCIMB 400	0.244086	0.000427483
fnu	Fusobacterium nucleatum ATCC 25586	0.238512	0.00041772
rfr	Rhodoferax ferrireducens T118 (DSM 15236)	0.1941	0.00033994
ppe	Pediococcus pentosaceus ATCC 25745	0.189304	0.000331539
spc	Shewanella putrefaciens CN-32	0.180151	0.00031551
kol	Kosmotoga olearia TBF 19.5.1	0.17501	0.000306505
ttr	Thermobaculum terrenum ATCC BAA-798	0.169527	0.000296902
rsh	Rhodobacter sphaeroides ATCC 17029	0.163705	0.000286707
ser	Staphylococcus epidermidis RP62A	0.148923	0.000260817
ccr	Caulobacter crescentus CB15	0.124994	0.00021891
sau	Staphylococcus aureus subsp. aureus N315, hospital-acquired	0.110082	0.000192793
sdy	Shigella dysenteriae Sd197	0.1081	0.000189321
dac	Delftia acidovorans SPH-1	0.0998082	0.0001748
cpn	Chlamydophila pneumoniae CWL029	0.088193	0.000154458
tbd	Thiobacillus denitrificans ATCC 25259	0.0876533	0.000153512
hhe	Helicobacter hepaticus ATCC 51449	0.0829959	0.000145356
pcr	Psychrobacter cryohalolentis K5	0.056831	9.95316e-05
cch	Chlorobium chlorochromatii CaD3	0.0498907	8.73765e-05
oan	Ochrobactrum anthropi ATCC 49188	0.0430563	7.5407e-05
nme	Neisseria meningitidis MC58 (serogroup B)	0.0300273	5.25886e-05
pmb	Prochlorococcus marinus AS9601	0.028489	4.98945e-05
rha	Rhodococcus jostii RHA1	0.0237727	4.16345e-05
str	Sebaldella termitidis ATCC 33386	0.0215533	3.77476e-05
cpr	Clostridium perfringens SM101	0.0187308	3.28044e-05
ste	Streptococcus thermophilus LMD-9	0.0158269	2.77186e-05
