# Supplementary material for: Metabolic Reconstruction for Metagenomic Data and Its Application to the Human Microbiome
Source: PLoS Comput Biol. 2012 Jun 13;8(6):e1002358. doi: 10.1371/journal.pcbi.1002358 (PMC3374609; doi:10.1371/journal.pcbi.1002358)
Supplement: Table S3 — Gold standard abundances of KEGG gene families, pathways, and modules for four synthetic metagenomes. A ground truth of genes, small functional modules, and large pathways in each of four synthetic metagenomes was calculated from the organismal compositions in Supplemental Table S2 as follows. The abundances of gene families were computed by multiplying the frequency of each KEGG Orthology gene family in organisms' reference genomes by the organism's relative abundance (even or staggered) in each community. Module presence/absence and abundance was determined based on conjunctive normal form satisfaction of constituent gene presence/absence and relative copy number, respectively. Pathway presence/absence was used as defined by KEGG, with abundance as multiplied by each organism's relative abundance within the communities. (XLSX) [file pcbi.1002358.s008.xlsx]

## Sheet: merged
ID	Even HC	Even LC	Staggered HC	Staggered LC
K00001	75	7	345.587	0.1514
K00002	2		20.6785
K00003	74	15	470.432	0.2484
K00004	8	2	36.2157	0.055
K00005	34	4	110.79	0.0211
K00007	7	1	20.9175	0.01
K00008	37	6	146.082	0.0123
K00009	18	5	98.4668	0.0122
K00010	37	1	60.9933	0.01
K00012	88	19	638.361	2.4311
K00013	89	15	521.072	0.7232
K00014	126	24	637.404	0.7986
K00015	13		349.045
K00016	46	13	192.322	0.3635
K00018	22	6	77.9055	0.64
K00019	32	3	95.9999	0.0201
K00020	81	3	534.325	0.07
K00021	2		0.495552
K00023	22	2	367.859	0.02
K00024	67	12	426.07	1.256
K00027	65	9	177.098	0.2231
K00028	2		2.60474
K00029	51	8	355.061	0.641
K00030	25	2	96.1805	0.0101
K00031	77	11	452.718	0.6831
K00032	1		4.6494
K00033	82	12	293.707	0.7372
K00034	12	1	24.956	0.1
K00035	4		2.77279
K00036	86	12	294.273	0.7372
K00038	7		10.7174
K00039	6		6.82907
K00040	19	4	61.9639	0.032
K00041	15	5	85.228	0.532
K00042	37	5	131.657	0.0131
K00043	5	3	44.1555	0.0201
K00044	6		19.5902
K00045	6		2.96027
K00046	28	7	79.7899	0.5322
K00048	10	6	42.6302	0.5221
K00050	23	1	195.387	0.001
K00052	84	18	500.98	0.7482
K00053	88	19	515.411	0.7384
K00054	15	4	54.0564	0.1111
K00055	10		178.115
K00057	97	20	527.952	0.8784
K00058	133	16	621.251	0.7233
K00059	308	38	2272.18	1.1716
K00060	28	2	83.8861	0.011
K00064	14		26.4785
K00065	25	4	55.6753	0.022
K00066	2		4.8435
K00067	84	17	357.507	1.7524
K00068	13	3	69.4054	0.0111
K00073	3	1	25.0048	0.001
K00074	76	8	400.785	0.0723
K00075	102	20	540.125	0.8784
K00076	11	2	30.7377	0.051
K00077	82	10	297.626	0.1041
K00079	6		18.4931
K00082	13		78.1931
K00086	11	1	44.8551	0.0001
K00087	6	1	26.9306	0.001
K00088	109	24	611.747	0.9435
K00090	16	1	47.5689	0.001
K00091	21	1	91.015	0.01
K00094	6	1	25.5763	0.001
K00096	2		11.1028
K00097	83	11	617.982	0.7511
K00098	9	1	39.6442	0.001
K00099	84	15	472.558	0.7573
K00100	117	9	316.462	1.5303
K00101	41	5	251.922	0.081
K00102	35	4	263.272	0.04
K00103	3		7.57088
K00104	63	6	341.563	0.1112
K00105	2	1	9.98633	0.0001
K00108	50	4	458.855	0.022
K00109	1		0.169527
K00111	82	9	402.502	0.0881
K00112	10	2	39.3616	0.011
K00113	11	2	40.033	0.011
K00114	7		177.611
K00116	42	7	160.953	0.118
K00117	17	1	389.511	0.001
K00118	4		20.8453
K00119	25	2	60.6417	0.02
K00120	3		22.9412
K00121	47	3	450.498	0.061
K00122	9	1	12.8587	0.001
K00123	105	10	305.319	0.0941
K00124	35	5	94.5338	0.081
K00126	9	1	20.6662	0.01
K00127	37	4	103.986	0.071
K00128	177	14	634.683	0.0842
K00129	4		3.32361
K00130	53	3	139.017	0.012
K00131	19	4	126.498	0.0202
K00132	3		1.97741
K00133	110	21	747.738	0.8893
K00134	152	26	792.756	0.9545
K00135	101	6	386.079	0.176
K00137	10	1	38.9618	0.001
K00138	2	1	24.7382	0.001
K00140	59	2	288.318	0.02
K00141	7	1	17.2182	0.01
K00145	88	15	527.484	0.7232
K00146	14	3	60.7093	0.021
K00147	84	14	478.929	0.7222
K00148	7	1	23.8566	0.01
K00150	10		54.9925
K00151	15	2	199.068	0.02
K00153	4	1	5.79663	0.005
K00154	19	1	210.696	0.01
K00155	35	3	89.3328	0.03
K00156	20	7	114.804	1.076
K00158	7	3	26.7694	0.1011
K00161	89	6	515.896	0.0262
K00162	83	6	510.01	0.0262
K00163	49	6	152.376	0.086
K00164	54	7	342.286	0.087
K00166	25	2	59.3138	0.011
K00167	25	2	59.3138	0.011
K00169	11		47.2056
K00170	11		47.2056
K00171	8		32.6704
K00172	11		47.2056
K00174	53	12	183.968	1.3011
K00175	52	12	215.82	1.2812
K00176	22	5	78.038	0.6201
K00177	24	7	136.272	0.6702
K00179	15	6	86.1972	0.6211
K00180	14	6	85.9044	0.6211
K00183	10	1	16.2048	0.01
K00184	14	1	60.7222	0.01
K00185	12	1	61.6418	0.01
K00194	2	1	33.0567	0.0001
K00197	2	1	33.0567	0.0001
K00198	11	3	71.1181	0.0102
K00200	2		9.46106
K00201	2		9.46106
K00202	2		9.46106
K00206	2		2.5188
K00207	1		0.486187
K00208	73	9	621.491	0.682
K00210	22	3	113.44	0.5501
K00214	1		2.16793
K00215	103	21	592.592	0.8884
K00216	10	2	34.8418	0.006
K00217	6		6.62517
K00218	22		134.721
K00219	39	2	292.971	0.011
K00220	3		0.654237
K00224	5	1	3.6686	0.05
K00226	111	27	644.432	1.9787
K00228	47	3	350.735	0.021
K00230	28	2	84.4522	0.011
K00231	25	6	54.6946	0.096
K00232	2	1	14.7504	0.01
K00239	79	14	447.17	0.7671
K00240	80	15	440.163	0.7771
K00241	67	11	388.455	0.747
K00242	40	4	269.086	0.066
K00243	34	12	160.275	0.7423
K00244	44	6	113.511	0.2611
K00245	26	3	69.4529	0.061
K00246	27	3	65.3502	0.061
K00247	15	2	42.4974	0.011
K00248	42	6	136.029	0.0505
K00249	110	4	852.652	0.04
K00252	27	3	252.339	0.021
K00253	41	1	272.128	0.01
K00255	14		17.0787
K00256	7		29.747
K00257	153	9	330.101	0.691
K00258	4		43.3635
K00259	57	8	359.851	0.642
K00260	35	6	104.345	0.0662
K00261	30	2	249.963	0.02
K00262	45	14	198.507	1.2622
K00263	20	1	105.809	0.01
K00265	55	8	354.258	0.6321
K00266	98	18	506.705	1.2752
K00270	3		14.581
K00273	5		23.0436
K00274	26	1	246.471	0.01
K00275	49	7	350.661	0.671
K00276	9	1	30.5545	0.001
K00278	71	12	454.4	0.6923
K00279	1		2.16793
K00281	50	7	235.005	0.626
K00282	28	3	244.503	0.0211
K00283	28	3	244.503	0.0211
K00284	22	3	105.03	0.021
K00285	70	5	362.695	0.081
K00286	106	20	638.525	1.3284
K00287	79	19	443.309	0.8293
K00290	12	8	47.2727	0.6811
K00292	1		20.4224
K00294	26	4	106.848	0.111
K00297	70	13	430.501	0.7162
K00298	3		19.9494
K00299	30	3	71.128	0.012
K00300	1		0.0237727
K00301	14		42.9084
K00302	12	1	22.2294	0.01
K00303	18		34.5598
K00304	10		20.0654
K00305	12		27.135
K00309	4		23.0458
K00311	31	2	229.63	0.06
K00313	15	5	91.0637	0.0131
K00314	3		4.7233
K00315	3		1.13608
K00317	4	1	4.67738	0.001
K00318	18	3	93.7212	0.061
K00320	7		0.166409
K00322	17	2	50.4115	0.011
K00324	78	6	591.436	0.0811
K00325	52	6	340.785	0.1211
K00326	1		9.05495
K00329	20	1	232.408	0.01
K00330	60	7	358.966	0.641
K00331	61	7	361.827	0.631
K00332	48	4	290.566	0.12
K00333	49	4	295.602	0.12
K00334	76	8	441.008	0.6711
K00335	77	8	434.831	0.6711
K00336	62	9	387.149	0.682
K00337	64	7	372.591	0.641
K00338	58	7	347.562	0.641
K00339	60	7	358.966	0.641
K00340	58	7	349.284	0.641
K00341	59	7	369.481	0.641
K00342	70	7	405.587	0.641
K00343	58	7	348.894	0.641
K00344	116	6	603.983	0.051
K00346	26	6	107.826	0.68
K00347	29	6	116.533	0.68
K00348	29	6	116.533	0.68
K00349	29	6	116.533	0.68
K00350	29	6	116.533	0.68
K00351	29	6	116.533	0.68
K00353	1		0.441831
K00354	4		13.0602
K00355	20	1	39.0205	0.01
K00356	42	2	462.683	0.0101
K00358	18	8	52.5359	0.6113
K00359	23	4	195.15	0.0004
K00362	42	6	99.9504	0.037
K00363	38	6	101.133	0.037
K00364	24	6	116.745	0.1221
K00365	4		4.81678
K00366	19	2	61.0045	0.0101
K00367	4		10.9844
K00368	19	4	229.49	0.08
K00369	5	1	9.88122	0.01
K00370	21	5	53.8105	0.027
K00371	21	5	53.8105	0.027
K00372	20	1	30.7768	0.01
K00373	22	5	60.1461	0.027
K00374	22	5	60.1461	0.027
K00375	85	13	410.216	0.0832
K00376	6	1	21.5076	0.01
K00378	34	8	132.282	0.6122
K00380	35	6	99.777	0.122
K00381	38	6	269.916	0.131
K00382	174	26	1059.78	1.4134
K00383	56	6	407.475	0.1261
K00384	166	30	1006.13	1.1799
K00385	6	2	34.8405	0.0101
K00387	4		3.02876
K00389	15	1	74.8899	0.001
K00390	59	6	360.482	0.1211
K00392	12	1	90.5938	0.01
K00394	6	2	2.07328	0.011
K00395	4		1.42889
K00404	41	3	301.157	0.11
K00405	39	3	282.168	0.11
K00406	33	2	246.002	0.1
K00407	26	1	210.966	0.05
K00411	33	3	249.636	0.11
K00412	32	3	84.5722	0.11
K00413	31	3	244.947	0.11
K00423	2		5.3836
K00425	87	14	466.884	0.728
K00426	90	14	467.94	0.728
K00427	6	1	28.4994	0.001
K00428	42	12	242.428	0.721
K00429	14		37.1109
K00432	73	12	574.841	0.6232
K00433	39	1	609.386	0.01
K00435	16		78.2579
K00436	7		4.85234
K00441	6		9.93453
K00446	11		18.9939
K00448	12	1	28.0449	0.01
K00449	15	1	49.6584	0.01
K00450	5		10.1211
K00451	21	2	75.6619	0.02
K00452	4	1	38.4571	0.01
K00453	16	2	87.6173	0.02
K00455	7	2	20.9367	0.02
K00457	43	3	127.968	0.03
K00459	56	8	608.736	0.1411
K00462	8		12.6231
K00463	1		9.05495
K00464	7		28.7384
K00466	2		4.67317
K00467	1		0.124994
K00469	1	1	14.7267	0.01
K00470	1		0.1081
K00471	2		9.97596
K00472	5		5.86268
K00476	3	1	14.2792	0.01
K00477	4	1	17.0456	0.01
K00478	2		3.95999
K00479	10	1	24.9939	0.01
K00480	19		37.8488
K00481	14	1	28.3388	0.01
K00483	19	1	197.55	0.01
K00484	8	2	23.8698	0.06
K00485	3		2.1661
K00486	4	1	35.6762	0.01
K00491	10	1	21.6412	0.001
K00492	27	3	35.7124	0.03
K00493	9		17.8303
K00494	15	1	356.997	0.01
K00495	2		2.14233
K00496	11	1	23.4468	0.01
K00499	6	1	23.5757	0.01
K00500	22	2	82.4424	0.02
K00505	3		5.6472
K00507	35	1	112.24	0.01
K00508	7	1	17.9706	0.01
K00510	17	1	94.1992	0.005
K00514	10		54.8674
K00517	76	3	113.801	0.016
K00518	10	2	62.5375	0.011
K00520	32	1	242.265	0.0001
K00523	14	2	37.9715	0.06
K00524	8		54.5539
K00525	120	21	974.556	0.7785
K00526	89	17	508.654	0.2684
K00527	54	19	211.26	0.8934
K00528	69	11	219.327	0.2272
K00529	53	3	273.715	0.021
K00532	4	1	32.8201	0.0001
K00533		1		0.001
K00534	3		0.763919
K00535	3		7.75118
K00536	1		1.08201
K00537	97	14	557.111	0.2133
K00539	1		0.406113
K00540	444	44	1883.63	1.9525
K00543	2	1	7.06967	0.01
K00545	2		2.5188
K00547	20	5	62.8961	0.113
K00548	85	12	514.759	0.6132
K00549	63	13	373.897	0.1582
K00551	6		180.556
K00554	100	20	570.985	0.8784
K00555	4		9.17753
K00556	22	1	141.034	0.001
K00557	22	4	75.239	0.111
K00558	92	22	448.838	0.9085
K00559	1		9.05495
K00560	75	17	439.036	0.8273
K00561	14	8	68.3376	0.0552
K00563	26	3	126.31	0.0012
K00564	40	4	115.247	0.0112
K00566	107	25	600.671	1.9385
K00567	89	19	490.345	0.8575
K00568	47	4	289.754	0.071
K00569	12		50.3108
K00570	1		2.11856
K00571	24	4	80.7973	0.1511
K00573	66	6	545.005	0.131
K00574	88	7	513.268	0.1712
K00575	70	6	240.616	0.0721
K00588	7	1	24.3819	0.0001
K00590	3		4.38576
K00595	38	5	153.492	0.131
K00596	3		10.3821
K00598	24	3	75.4757	0.0111
K00599	178	39	514.777	2.0646
K00600	118	21	797.851	0.8884
K00602	95	21	533.823	0.8984
K00603	10	5	45.419	0.6002
K00604	107	21	619.161	0.8884
K00605	85	11	634.607	0.707
K00606	85	12	500.647	0.7471
K00607	3		41.3309
K00608	2		8.41439
K00609	94	19	540.006	0.8684
K00610	20	9	84.0248	0.6821
K00611	76	14	299.399	0.1453
K00612	15	1	105.168	0.01
K00613	1		0.263608
K00614	3		21.3696
K00615	184	37	916.347	1.0601
K00616	107	19	591.958	0.7792
K00619	46	4	132.422	0.071
K00620	62	7	388.533	0.0722
K00622	7		18.5267
K00624	1		8.98423
K00625	39	12	142.69	0.7522
K00626	223	15	2207.94	0.1743
K00627	105	10	602.959	0.0972
K00630	1		0.088193
K00631	22	2	61.3387	0.011
K00632	68	5	375.816	0.023
K00633	17	4	84.1978	0.5511
K00634	20	4	271.067	0.5202
K00638	24	5	100.182	1.08
K00639	44	10	233.946	0.692
K00640	117	25	648.682	1.4482
K00641	45	6	294.142	0.086
K00643	9		170.868
K00645	109	21	550.023	0.8083
K00646	2	1	7.06967	0.01
K00647	48	4	475.548	0.031
K00648	152	31	917.867	1.5034
K00650	1		3.26504
K00651	45	12	214.466	0.7423
K00652	74	13	456.643	1.2821
K00655	145	26	893.974	0.9554
K00656	75	23	348.768	1.1867
K00657	36	8	178.812	0.6213
K00658	66	10	415.69	0.647
K00660	15	1	60.1154	0.01
K00661	49	14	263.189	1.2373
K00662	11	3	22.3519	0.151
K00663	8		11.2559
K00666	139	7	928.115	0.61
K00672	2		9.46106
K00673	25	3	88.4296	0.021
K00674	64	12	404.568	0.2463
K00675	18	2	70.2878	0.011
K00676	32	5	137.585	0.5103
K00677	75	16	482.039	1.3411
K00680	133	21	554.017	0.1722
K00681	93	10	769.756	0.0923
K00683	2		20.7409
K00684	43	6	320.832	0.141
K00685	25	2	228.088	0.06
K00686	5		10.1439
K00687	2	1	18.2806	0.0001
K00688	84	17	304.143	1.2544
K00689	2		25.4693
K00690	16	5	88.5446	0.2012
K00691	8	3	76.9506	0.1501
K00692	3	1	13.7806	0.01
K00694	32	4	137.507	0.0211
K00695	4		13.6544
K00696	12	1	84.757	0.01
K00697	34	4	295.725	0.071
K00700	70	13	461.463	0.7424
K00701	1		2.16793
K00703	66	14	336.03	0.7623
K00705	63	13	365.084	0.6524
K00712	9	3	2.69742	0.0021
K00720	13	4	31.0076	0.0301
K00721	42	11	200.135	0.7461
K00729	1		0.671357
K00745	1	1	18.2647	0.0001
K00748	69	13	439.666	0.7711
K00752	4	1	36.0962	0.01
K00754	44	7	321.466	0.1303
K00756	27	6	89.8567	0.0222
K00757	32	7	140.346	0.641
K00758	25	2	260.111	0.011
K00759	95	17	534.043	0.7585
K00760	88	20	549.001	0.8285
K00761	85	19	373.584	0.8684
K00762	96	20	537.554	0.8784
K00763	83	19	303.798	0.8184
K00764	99	21	562.626	0.8984
K00765	83	14	516.249	0.7132
K00766	76	13	453.992	0.6672
K00767	75	13	478.786	0.6924
K00768	56	10	354.209	0.1612
K00769	18	3	54.3868	0.061
K00772	27	1	269.817	0.01
K00773	96	19	531.422	0.7784
K00777	1		0.406113
K00782	40	14	173.165	0.7761
K00783	82	19	525.585	0.8734
K00784	60	11	469.68	0.7332
K00785	4	2	23.4979	0.06
K00786	15	1	97.1268	0.001
K00788	104	26	756.128	0.9096
K00789	106	20	595.072	0.8784
K00790	122	23	595.902	0.8895
K00791	105	24	584.62	1.4984
K00793	99	17	545.844	0.7733
K00794	99	18	530.326	0.7783
K00795	38	5	266.437	0.121
K00796	93	18	527.17	0.7774
K00797	64	8	433.716	0.0822
K00798	86	6	332.21	0.0411
K00799	223	9	2430.41	0.072
K00800	96	20	533.452	0.7884
K00801	9	1	36.7774	0.01
K00803	13		182.806
K00805	36	6	140.105	0.0073
K00806	102	21	565.618	0.8785
K00808	5		167.854
K00809	9	1	41.9478	0.01
K00811	17	8	121.245	0.6002
K00812	60	6	419.565	0.6301
K00813	18	3	63.0764	0.061
K00817	139	23	655.736	0.8293
K00818	51	6	239.842	0.6301
K00819	25	5	100.538	0.112
K00820	119	19	560.264	0.7884
K00821	42	9	311.29	0.1021
K00822	21	2	209.609	0.02
K00823	29	4	93.5959	0.0121
K00824	30	3	209.219	0.021
K00826	114	19	722.727	0.8882
K00829	1		2.11856
K00830	25		84.7195
K00831	61	13	409.075	0.7621
K00832	33	5	101.158	0.081
K00833	63	12	436.086	0.7421
K00835	14	2	59.9078	0.051
K00836	19	2	44.8736	0.02
K00837	35	5	163.016	0.5103
K00839	15	2	59.0958	0.0011
K00840	6	1	31.8448	0.001
K00841	13	5	41.4113	0.2111
K00842	2	2	24.1247	0.06
K00845	98	20	610.382	1.9134
K00846	1		9.05495
K00847	92	20	594.638	1.3573
K00848	15	5	65.5986	0.572
K00849	47	15	357.634	0.7773
K00850	98	24	604.236	1.7824
K00851	54	9	165.846	0.1831
K00852	81	13	336.635	1.2823
K00853	18	3	74.9099	0.012
K00854	58	13	229.252	1.1123
K00855	32	1	111.313	0.001
K00856	14	1	31.1176	0.01
K00857	52	11	221.894	0.7521
K00858	111	20	626.819	0.8784
K00859	99	20	570.287	0.8784
K00860	48	8	211.538	0.641
K00862	1		0.486187
K00863	18	1	40.6854	0.01
K00864	81	14	463.514	0.2884
K00865	66	15	215.513	0.7943
K00867	28	5	248.808	0.1161
K00868	53	15	211.092	0.7143
K00869	15	5	64.2033	0.1211
K00870	3	2	1.80453	0.0002
K00872	58	12	254.269	0.1973
K00873	116	20	621.051	0.8294
K00874	49	10	199.267	0.5842
K00876	76	18	358.083	1.3932
K00878	38	7	134.616	0.0124
K00879	8	3	46.3203	0.5011
K00880	13	2	44.6038	0.011
K00881	3	1	24.7597	0.001
K00882	55	12	218.608	0.1384
K00883	18	2	52.2846	0.011
K00884	14	2	43.7462	0.011
K00885	7	2	35.1811	0.011
K00886	11	2	36.3778	0.0051
K00887	1		0.0237727
K00891	99	20	548.188	0.7803
K00892	12	1	39.5009	0.001
K00895	11	4	56.4477	0.62
K00897	13	1	39.0891	0.1
K00899	14	1	24.0857	0.0001
K00901	78	12	320.894	0.2022
K00903	38	6	152.8	0.082
K00904	14	3	94.7851	0.21
K00906	15	2	53.6411	0.011
K00908	38		81.3344
K00912	56	13	373.81	0.7711
K00917	23	6	105.073	0.0132
K00919	88	16	472.854	0.7583
K00924	30		116.047
K00925	99	24	537.607	1.2284
K00926	37	9	310.341	0.0261
K00927	101	20	570.849	0.8784
K00928	119	24	620.5	0.9895
K00929	26	5	152.346	0.5203
K00930	85	15	524.775	0.7232
K00931	81	14	457.771	0.7222
K00932	5	1	28.3996	0.001
K00934	1		1.08201
K00936	270	23	1325.46	0.1832
K00937	71	15	467.677	1.2571
K00938	11	4	28.2575	0.1111
K00939	106	20	574.505	0.8784
K00940	86	11	468.242	0.6921
K00941	86	19	505.323	0.8284
K00942	102	21	584.005	0.9784
K00943	102	14	506.456	0.2474
K00944	1		8.98423
K00945	83	19	514.566	0.8293
K00946	64	12	435.423	0.766
K00947	1		2.16793
K00948	120	25	797.489	0.9986
K00949	29	8	115.113	0.6213
K00950	92	14	513.958	0.7671
K00951	99	21	447.088	0.8984
K00952	2	1	1.02301	0.01
K00954	95	20	535.045	0.8784
K00955	16		185.327
K00956	33	9	160.98	0.682
K00957	51	10	353.377	0.692
K00958	25	1	74.6172	0.05
K00960	2		2.12355
K00962	99	19	529.782	0.7784
K00963	96	18	499.237	0.3585
K00965	46	12	369.196	0.1326
K00966	40	1	135.158	0.5
K00968	2	1	23.9623	0.05
K00969	90	18	563.76	0.8584
K00970	72	8	417.876	0.6212
K00971	74	14	502.806	1.1871
K00972	2	1	0.3624	0.001
K00973	91	16	497.718	1.2781
K00974	65	11	249.832	0.2372
K00975	74	15	294.653	0.2337
K00978	25	2	230.299	0.52
K00979	67	14	434.357	0.8211
K00980	17	6	66.0014	0.1562
K00981	113	24	632.026	1.3895
K00982	43	6	293.302	0.0761
K00983	27	7	126.431	0.225
K00984	13	5	5.97634	0.005
K00985	1		3.26504
K00986	17	1	43.3672	0.0001
K00988	9		54.8175
K00989	63	9	362.947	0.0962
K00990	48	6	316.516	0.1211
K00991	88	24	391.052	1.3904
K00992	4		3.05632
K00995	133	19	617.279	0.7496
K00996	3	2	186.448	0.02
K00997	79	12	420.047	0.2373
K00998	76	11	403.083	0.7111
K01000	98	20	538.369	0.8784
K01002	5	1	28.3996	0.001
K01003	7		176.035
K01004	6		169.536
K01005	7	1	89.8722	0.5
K01006	37	7	268.568	0.6212
K01007	50	5	163.582	0.0711
K01008	45	7	163.238	0.1311
K01011	80	6	440.555	0.0222
K01012	92	18	537.61	0.8133
K01013	1		0.406113
K01014	1		9.05495
K01015	1		0.486187
K01023	3		18.5725
K01025	2		2.5188
K01026	2	1	0.531256	0.0001
K01027	1		4.28304
K01028	29	2	86.4537	0.02
K01029	33	2	95.8624	0.02
K01031	14	1	41.3943	0.01
K01032	15	1	41.5193	0.01
K01034	15	3	79.5092	0.0511
K01035	9	3	68.9339	0.0511
K01036	6	4	3.03565	0.0004
K01039	9	1	15.7569	0.0001
K01040	7	1	15.2469	0.0001
K01041	16		11.8987
K01042	37	6	137.475	0.0712
K01043	38	1	483.219	0.001
K01044	19	2	40.2522	0.02
K01046	49	5	137.698	0.0131
K01048	27	2	242.095	0.011
K01051	10	6	69.2879	0.542
K01053	22	2	198.141	0.02
K01054	4		23.5429
K01055	19		38.8614
K01056	101	20	583.952	0.8784
K01057	50	9	202.542	0.6451
K01058	27	6	121.7	0.171
K01060	1	1	0.169527	0.0001
K01061	65	4	510.974	0.031
K01066	42	3	117.139	0.021
K01067	14		26.8465
K01069	74	5	407.727	0.0711
K01070	38	5	295.121	0.112
K01071	7	3	30.3818	0.1011
K01073	4	1	9.19323	0.01
K01075	4		4.96708
K01076	16	1	78.7785	0.01
K01077	61	9	267.263	0.682
K01078	8	1	16.7271	0.01
K01079	69	15	416.908	0.7614
K01080	1		1.79205
K01081	45	2	234.665	0.02
K01082	2		0.351801
K01083	5	1	20.934	0.01
K01085	6	2	28.6597	0.021
K01087	22	2	225.79	0.011
K01089	20	7	123.796	0.641
K01090	68	11	233.656	0.6723
K01091	141	23	926.24	1.3453
K01092	122	12	727.56	0.7422
K01093	7	1	28.8431	0.001
K01095	41	7	293.016	0.6211
K01096	15	2	50.9631	0.011
K01101	13	3	42.9199	0.1002
K01104	137	34	510.48	1.1686
K01112	19	2	121.996	0.002
K01113	29	1	407.607	0.01
K01114	46	7	133.734	0.061
K01115	3		5.44043
K01117	3		15.0912
K01118	66	6	342.065	0.1221
K01119	41	8	132.608	0.651
K01120	7	1	32.7608	0.01
K01121	1	1	0.238512	0.0001
K01126	146	26	859.588	1.3735
K01127	2		18.1099
K01128	3		1.33391
K01129	59	11	360.392	0.6621
K01130	39	10	365.589	1.151
K01133	11	1	36.8265	0.01
K01134	1		0.486187
K01138	20	3	126.149	0.012
K01139	31	6	105.708	0.1211
K01141	22	2	224.848	0.011
K01142	113	22	748.107	1.0414
K01144	12	3	43.8281	0.6
K01146	11	1	39.0269	0.001
K01147	33	4	133.256	0.071
K01150	15	1	67.0168	0.001
K01151	44	9	197.748	0.5732
K01152	3		3.99022
K01153	91	16	485.668	1.1683
K01154	72	15	396.149	0.6283
K01155	12	8	23.4548	0.2013
K01156	19	6	92.9638	0.0901
K01157	2	1	0.680343	0.0001
K01159	80	16	488.752	0.7763
K01160	2	1	24.7382	0.001
K01161	1		0.361077
K01162	1		4.6494
K01163	10	6	70.1734	0.6102
K01167	4	1	17.0456	0.01
K01169	6	1	33.6751	0.001
K01173	7	2	29.6983	0.1001
K01174	19	4	57.0261	0.062
K01175	72	7	354.924	0.034
K01176	31	9	191.993	0.5822
K01178	4		4.65557
K01179	52	6	236.394	0.0421
K01180	1		1.0408
K01181	11	3	54.7541	0.03
K01182	12	4	53.3325	0.0601
K01183	26	1	51.424	0.01
K01185	17	3	68.0124	0.022
K01186	6	7	40.7186	0.6202
K01187	67	13	460.226	0.8621
K01188	38	11	318.945	1.4101
K01190	56	30	412.214	4.6913
K01191	29	9	159.602	0.5715
K01192	21	4	58.6633	0.57
K01193	32	11	154.972	0.2364
K01194	19	4	117.386	0.022
K01195	9	5	55.9412	0.042
K01197	7	2	36.6892	0.55
K01198	19	4	117.282	0.0211
K01199	4	1	15.0183	0.01
K01200	21	5	66.9975	0.7201
K01201	14	5	98.4492	0.62
K01205	1	1	14.7267	0.01
K01206	20	12	111.422	1.7301
K01207	62	6	328.044	0.101
K01208	2		3.20874
K01209	34	11	181.528	0.6203
K01210	2	1	3.17005	0.0001
K01212	8	5	79.6165	1.08
K01214	2		6.35941
K01215	3	2	25.4261	0.1001
K01216	2	1	14.8904	0.01
K01218	4	2	29.7513	0.02
K01219	1		4.6494
K01220	6	4	1.93447	0.0112
K01222	28	2	103.793	0.0011
K01223	56	22	496.651	0.53
K01224	11	4	43.9689	0.5401
K01226	22	7	124.89	0.1172
K01227	4	1	44.338	0.0001
K01232	15	4	80.8679	0.1102
K01234	5	1	28.1077	0.1
K01235	6	3	44.3409	0.53
K01236	16	1	198.091	0.01
K01238	36	1	415.441	0.0001
K01239	41	5	96.7497	0.2102
K01241	25	5	90.2119	0.611
K01243	80	18	287.78	0.8184
K01246	54	13	382.824	0.7472
K01247	42	4	128.382	0.031
K01249	3		1.22713
K01250	10	1	38.3228	0.001
K01251	52	6	380.88	0.5801
K01252	7	2	34.9187	0.006
K01253	6		5.33506
K01255	95	8	685.007	0.0772
K01256	77	14	497.229	0.2812
K01258	42	16	215.096	0.8633
K01259	60	9	414.093	0.3902
K01261	4	1	19.3609	0.0001
K01262	101	20	604.678	0.8474
K01263	1		1.08201
K01265	137	28	875.787	1.4745
K01266	15	1	39.9241	0.01
K01267	4	1	1.94473	0.0001
K01269	56	7	184.822	0.0223
K01270	45	21	209.889	1.3344
K01271	65	10	290.231	0.7025
K01273	27	5	284.667	0.0801
K01274	3	1	22.9412	0.0001
K01277	6	4	56.0851	0.62
K01278	18	9	136.529	0.7501
K01281	11	2	42.6379	0.1001
K01283	2		9.22832
K01284	33	11	183.975	1.301
K01286	52	3	242.071	0.021
K01289	1		20.4224
K01295	10	2	41.7523	0.0101
K01297	46	11	198.091	0.6411
K01299	30	1	271.719	0.0001
K01301	1		0.0237727
K01303	5	1	10.7468	0.0001
K01304	30	9	93.2606	0.1165
K01305	9	1	42.2355	0.001
K01308	4		9.06111
K01317	2		4.33587
K01318	3	1	0.629877	0.001
K01322	31	4	109.483	0.08
K01338	106	18	585.633	1.2832
K01347	7	3	52.9304	0.15
K01354	29	5	261.767	0.0162
K01355	2	1	24.7382	0.001
K01356	76	11	409.126	0.1383
K01358	151	23	953.124	0.8836
K01361	6	1	15.4412	0.1
K01362	118	15	397.276	0.7717
K01364	1		0.931383
K01372	15	9	91.7369	0.7703
K01387	15	1	46.4444	0.01
K01389	1		0.0237727
K01390		1		0.0001
K01392	2		1.44692
K01400	10	1	25.7207	0.01
K01401	3	1	0.629877	0.001
K01406	2		2.33164
K01407	7	1	31.246	0.001
K01408	1		0.088193
K01409	105	23	608.747	0.8886
K01412	12		40.622
K01414	44	5	207.576	0.081
K01415	9	1	25.8182	0.01
K01417	67	13	269.777	0.1874
K01419	57	6	320.83	0.172
K01420	80	13	378.146	0.4012
K01421	28	6	106.486	0.0091
K01422	14	3	17.4374	0.5501
K01423	58	6	325.408	0.122
K01424	95	19	383.241	1.8393
K01425	46	9	206.669	0.5872
K01426	86	3	512.128	0.03
K01428	40	3	103.588	0.021
K01429	36	3	98.9093	0.021
K01430	37	3	98.9662	0.021
K01431	4	1	9.67442	0.01
K01433	64	8	228.466	0.611
K01434	21	3	68.8823	0.03
K01436	37	5	170.523	0.0005
K01437	8		49.4978
K01438	47	7	365.06	0.0961
K01439	77	12	355.415	0.1284
K01442	22	8	120.469	0.3521
K01443	73	19	331.022	1.7935
K01444	4	2	68.0379	0.0101
K01446	3		19.2119
K01447	42	10	312.255	1.2302
K01448	159	31	821.982	0.9496
K01449	24	1	69.0457	0.0001
K01451	52	3	116.444	0.07
K01452	8	1	21.484	0.01
K01453	13	1	33.7593	0.01
K01454	1		2.11856
K01455	12		16.6067
K01457	10		176.494
K01458	10	2	27.1261	0.02
K01459	2		2.31266
K01460	5	1	28.3996	0.001
K01461	1		0.0237727
K01462	155	29	859.804	0.9958
K01463	31	4	117.632	0.0103
K01464	21	4	125.963	0.0112
K01465	134	24	851.222	0.9395
K01466	7	1	34.6952	0.001
K01467	84	10	387.515	0.6921
K01468	40	8	135.453	0.6212
K01469	15		191.162
K01470	30	1	251.975	0.0001
K01471	2	1	7.06967	0.01
K01473	14		184.38
K01474	12		18.1276
K01476	29	7	113.142	0.3111
K01477	10	2	34.6012	0.02
K01478	28	3	44.5411	0.0111
K01479	20	2	42.53	0.0011
K01480	56	6	230.471	0.0811
K01482	4		10.7363
K01483	23	2	77.6426	0.011
K01484	19	2	66.2606	0.011
K01485	57	4	177.73	0.0211
K01486	34	4	142.011	0.0611
K01487	30	5	132.391	0.0711
K01488	50	6	229.181	0.1221
K01489	68	14	278.198	0.6732
K01491	101	19	572.885	0.8284
K01492	2	2	43.4541	0.5001
K01493	47	14	251.758	0.7524
K01494	59	6	354.963	0.1211
K01495	89	20	524.916	0.7574
K01496	38	4	253.22	0.0701
K01497	31	6	97.0874	0.131
K01499	1		0.406113
K01500	7		50.8749
K01501	26	4	121.509	0.1101
K01502	5		4.57567
K01504	5	1	7.80585	0.01
K01505	13	3	77.2162	0.07
K01506	12		128.819
K01507	144	24	917.863	0.8496
K01512	51	8	157.428	0.1272
K01514	75	12	440.716	0.7461
K01515	77	14	420.253	0.1993
K01516	101	19	581.651	0.8783
K01518	2	1	9.29346	0.0001
K01520	79	17	470.412	0.8174
K01521	8	1	31.3849	0.001
K01523	32	4	249.279	0.0701
K01524	17	2	46.5049	0.051
K01525	30	3	101.096	0.021
K01529	36	6	213.369	0.1212
K01531	28	6	208.197	0.6112
K01533	146	23	1051.53	0.9384
K01534	77	12	803.733	0.7122
K01535	1		0.0237727
K01537	52	10	163.477	0.2404
K01539	1		0.671357
K01541		1		0.0001
K01545	5	1	29.8142	0.001
K01546	45	9	344.685	0.6231
K01547	45	9	346.157	0.6231
K01548	47	9	345.219	0.6231
K01551	46	4	83.5472	1.0002
K01552	34	8	123.702	0.2064
K01554	9	1	70.9392	0.001
K01555	13	2	67.6277	0.02
K01556	17	2	73.554	0.02
K01557	1		2.11856
K01560	37	4	147.248	0.04
K01561	10		20.8717
K01563	27		224.051
K01564	6	1	5.76187	0.05
K01567	41	3	134.896	0.0003
K01569	7	1	24.0499	0.01
K01571	25	6	71.9296	0.0811
K01572	27	7	111.004	1.131
K01573	11	1	20.8212	0.01
K01574	7	1	22.1265	0.01
K01575	16	4	55.0669	0.0071
K01576	6	1	10.4821	0.01
K01577	6	2	33.595	0.101
K01578	3		2.41247
K01579	57	11	219.543	0.752
K01580	20	4	116.165	0.552
K01581	35	5	431.095	0.1121
K01582	29	3	126.314	0.0021
K01583	2		22.9273
K01584	14	2	59.6005	0.011
K01585	41	9	253.471	0.6412
K01586	112	25	628.176	0.9504
K01588	94	20	534.06	0.8784
K01589	72	10	430.085	0.1872
K01590	3		2.07439
K01591	96	21	536.977	0.8785
K01593	5		17.9152
K01595	54	9	206.626	0.1912
K01596	16	2	26.4456	0.015
K01597	14	5	64.0338	0.1211
K01598	3	1	32.1638	0.0001
K01599	83	10	426.104	0.167
K01601	27	1	75.9479	0.01
K01602	15		65.4222
K01605	3	1	2.52801	0.05
K01606	3	2	12.2868	0.55
K01607	64	6	208.464	0.59
K01608	12	1	40.4149	0.001
K01609	64	12	427.804	0.7071
K01610	48	14	357.672	0.8131
K01611	47	5	394.403	0.0311
K01613	76	16	421.443	0.9311
K01615	1	2	0.238512	0.0101
K01616	3		2.54257
K01617	10		26.46
K01618	10	1	59.1546	0.01
K01619	83	17	410.234	1.2742
K01620	54	12	532.565	0.6523
K01621	10	1	24.3355	0.1
K01623	42	9	323.593	1.1221
K01624	107	20	426.531	0.8384
K01625	67	12	312.639	0.6622
K01626	105	15	505.525	0.1494
K01627	65	14	559.381	0.7911
K01628	40	5	294.972	0.0113
K01629	11	5	64.5038	0.572
K01630	12	2	46.0692	0.011
K01631	18	2	52.3572	0.011
K01632	4		18.5076
K01633	85	16	498.872	0.7871
K01634	2		165.56
K01635	12	3	4.46878	0.0111
K01636	7	2	5.33868	0.0002
K01637	43	3	286.318	0.021
K01638	49	4	322.005	0.022
K01639	17	8	93.9191	0.0624
K01640	40	2	143.416	0.0101
K01641	13	6	43.3028	0.1311
K01643	12	4	48.0479	0.1111
K01644	61	8	470.013	0.1461
K01646	12	4	48.0479	0.1111
K01647	111	14	864.229	0.7041
K01648	6		30.2122
K01649	108	17	712.533	0.7683
K01652	175	22	1046.43	0.7603
K01653	88	18	521.306	0.7392
K01654	32	7	139.942	0.2151
K01655	16	1	57.876	0.0001
K01657	81	16	480.71	0.7282
K01658	61	12	393.666	0.7121
K01659	19	4	82.4879	0.062
K01661	50	10	218.953	0.657
K01662	93	20	549.071	1.3684
K01664	44	8	337.593	0.0673
K01665	48	8	414.773	0.5722
K01666	26	2	60.7212	0.002
K01667	12	5	49.7789	0.5611
K01668	3	2	3.65147	0.0101
K01669	68	4	428.915	0.022
K01671	2	1	24.7382	0.001
K01673	109	17	534.077	0.7183
K01674	17	1	56.5359	0.01
K01676	44	9	162.102	0.692
K01677	10	3	56.6775	0.0111
K01678	10	3	56.6775	0.0111
K01679	72	11	438.813	0.297
K01681	83	13	512.971	0.6442
K01682	43	5	177.838	0.121
K01684	17	2	59.1322	0.011
K01685	27	8	179.255	0.5822
K01686	31	8	150.626	1.092
K01687	124	23	631.289	0.8413
K01689	102	21	598.206	0.9284
K01690	27	3	78.1557	0.061
K01692	335	15	4913.56	0.1122
K01693	61	8	387.153	0.0822
K01695	82	16	482.066	0.7282
K01696	85	17	488.804	0.7283
K01697	16	3	59.4089	0.0201
K01698	88	13	463.039	0.1582
K01699	4		4.17884
K01703	91	17	526.154	0.7292
K01704	91	17	526.154	0.7283
K01706	15	1	54.5869	0.001
K01707	10		18.582
K01708	11	1	43.2776	0.001
K01709	17	2	229.943	0.52
K01710	133	24	702.673	1.9284
K01711	59	9	508.503	0.701
K01712	43	8	141.323	0.6212
K01713	9	3	23.3222	0.0301
K01714	176	29	868.679	1.5006
K01715	14	5	110.369	0.0603
K01716	25	2	234.448	0.011
K01718	6	1	6.75141	0.05
K01719	68	10	429.097	0.213
K01720	19	3	74.1737	0.021
K01721	14		35.0782
K01724	51	1	340.748	0.01
K01725	15	2	60.6543	0.011
K01726	8	3	74.157	0.0003
K01727	2	2	0.480955	0.0011
K01728	3	1	15.5314	0.01
K01729	3		8.15852
K01730	5		4.62006
K01731	1		0.318564
K01733	94	18	548.854	0.8283
K01734	37	9	212.925	1.0821
K01735	96	18	509.995	0.7783
K01736	93	19	521.022	0.7784
K01737	86	14	526.775	0.754
K01738	154	27	893.783	1.5415
K01739	61	9	220.709	0.0683
K01740	73	17	469.801	1.2332
K01741	3	1	0.460859	0.01
K01744	46	10	162.387	0.7311
K01745	63	10	381.435	0.6313
K01746	4	2	1.70115	0.0002
K01749	83	13	457.833	0.1582
K01750	52	5	161.924	0.0661
K01751	12	4	102.466	0.0112
K01752	105	25	406.783	0.9625
K01753	25	3	79.7143	0.0111
K01754	120	20	578.107	0.2304
K01755	89	16	519.203	0.7332
K01756	99	21	575.411	0.9284
K01757	1		0.0237727
K01758	7	2	38.8341	0.0101
K01759	106	16	502.93	1.2514
K01760	61	14	339.173	0.3122
K01761	31	5	110.035	0.0702
K01766	11	2	43.8578	0.011
K01768	87	1	378.813	0.005
K01770	74	13	299.445	0.6973
K01771	7	1	13.0223	0.001
K01772	86	12	460.846	0.2471
K01774	1		20.4224
K01775	126	24	599.165	0.8905
K01776	100	20	526.816	0.8784
K01777	17	1	63.0573	0.0001
K01778	89	16	519.883	0.8272
K01779	40	7	157.568	0.2302
K01780	3	1	3.49117	0.0001
K01782	29	1	241.379	0.001
K01783	109	23	660.263	0.8895
K01784	196	33	929.579	1.0898
K01785	62	21	317.831	2.8832
K01786	22	5	78.4549	0.0411
K01787	7	4	58.9024	1.55
K01788	23	8	125.357	0.0624
K01789	3		23.0271
K01790	86	15	615.001	1.2523
K01791	71	26	365.325	3.0753
K01792	19	3	60.5449	0.0111
K01795	28	4	173.435	1.5001
K01796	19		197.903
K01797	20	1	45.5318	0.01
K01798	6		9.37598
K01799	10		26.5253
K01800	21	1	221.762	0.01
K01801	1		2.11856
K01802	89	17	740.025	1.3206
K01803	105	21	579.254	0.8884
K01804	21	5	87.5159	0.5311
K01805	28	6	157.535	0.5612
K01807	70	11	410.419	0.8222
K01808	59	17	305.455	0.7373
K01809	92	17	510.675	0.7882
K01810	105	21	584.28	0.9284
K01811	19	10	143.46	0.7221
K01812	23	6	103.29	0.582
K01813	12	5	65.2972	0.572
K01814	85	16	523.928	0.7282
K01815	19	6	67.0743	1.032
K01816	35	4	108.113	0.071
K01817	64	10	422.492	0.6821
K01818	9	4	46.5804	0.5211
K01819	15	6	5.75325	0.0222
K01820	3		4.3968
K01821	49	10	159.334	0.2821
K01822	6		5.77508
K01823	37	6	118.73	0.1221
K01825	14	1	46.261	0.001
K01826	19	3	64.3863	0.03
K01828	6		7.5564
K01829	4		4.51225
K01834	259	56	1794.38	3.2502
K01835	65	9	258.621	0.1813
K01838	21	6	165.726	0.1612
K01839	38	7	124.448	0.0232
K01840	109	20	410.985	1.3482
K01841	8	2	42.4982	0.51
K01842	4		22.9649
K01843	34	5	168.282	0.6002
K01844	11	4	11.3706	0.1002
K01845	96	14	468.472	0.1691
K01846	5	3	1.11638	0.0003
K01847	44	13	395.844	1.281
K01848	12	1	22.0861	0.01
K01849	11	1	21.9166	0.01
K01850	9	2	32.0654	0.51
K01851	2		9.97596
K01854	25	9	91.767	0.2871
K01856	14	1	34.6129	0.01
K01857	15	1	28.5329	0.01
K01858	13	2	41.8477	0.52
K01865	4		5.0376
K01866	107	21	590.598	0.8884
K01867	112	21	768.433	0.8884
K01868	106	20	579.069	0.8784
K01869	102	20	588.958	0.8784
K01870	105	21	581.219	0.8884
K01872	102	21	578.054	0.8884
K01873	100	20	570.985	0.8784
K01874	105	20	573.414	0.8784
K01875	103	21	605.433	0.8785
K01876	101	21	584.878	0.8794
K01878	68	11	424.793	0.2413
K01879	69	11	425.42	0.2413
K01880	31	9	146.104	0.6371
K01881	107	21	608.208	0.8785
K01883	109	21	581.276	0.8834
K01885	98	18	683.449	0.8322
K01886	44	12	207.954	0.7121
K01887	102	20	573.108	0.8784
K01889	100	20	570.985	0.8784
K01890	100	20	570.985	0.8784
K01892	104	20	574.028	0.8784
K01893	59	13	278.113	0.7523
K01894	33	3	256.914	0.061
K01895	108	12	564.184	0.668
K01897	171	31	776.466	2.5176
K01902	69	10	390.928	0.6371
K01903	69	10	390.928	0.6371
K01904	2		0.0475453
K01905	2	1	7.06967	0.01
K01906	5	2	14.9709	0.011
K01907	19		361.403
K01908	26	1	217.975	0.001
K01909	3		2.60699
K01910	11	3	47.7551	0.1011
K01911	49	10	219.1	0.657
K01912	52	9	243.012	1.161
K01913	26		17.2843
K01914	29	10	128.656	0.6913
K01915	181	29	1609.67	1.9944
K01916	67	13	461.35	0.2473
K01917	9	2	16.7529	0.06
K01918	72	13	439.535	0.7571
K01919	55	5	318.351	0.081
K01920	50	3	340.659	0.061
K01921	116	22	630.801	0.8795
K01922	3	1	19.2119	0.0001
K01923	97	21	569.805	0.8785
K01924	97	20	553.585	0.8784
K01925	98	20	535.229	0.8784
K01926	36	9	139.251	0.7122
K01928	105	20	569.706	0.9774
K01929	103	22	548.134	1.4284
K01932	2	2	3.03277	0.0501
K01933	92	20	532.982	0.8784
K01934	64	14	438.671	0.8063
K01935	75	14	478.494	0.7531
K01937	99	18	538.389	0.8782
K01938	45	15	159.574	0.8774
K01939	104	22	604.098	0.8894
K01940	85	15	511.999	0.7232
K01941	8	1	184.267	0.01
K01945	93	20	532.29	0.8784
K01947	2	1	13.9235	0.05
K01950	44	7	163.959	0.6311
K01951	124	24	986.322	1.4484
K01952	177	27	1173.01	1.1894
K01953	92	14	603.913	0.7722
K01955	112	26	660.07	1.5985
K01956	95	21	570.716	0.9585
K01958	27	3	105.596	0.0111
K01959	6	1	34.9536	0.05
K01960	12	4	71.3876	0.62
K01961	93	16	528.848	1.2042
K01962	82	14	454.838	0.1943
K01963	82	13	455.282	0.1443
K01965	13		169.849
K01966	54	7	483.37	0.6161
K01968	21	1	203.66	0.01
K01969	27	1	215.856	0.01
K01970	2		40.8447
K01971	77	4	429.792	0.12
K01972	107	21	624.238	0.8794
K01974	7	1	28.4567	0.001
K01975	44	2	284.396	0.011
K01976	2		2.5188
K01977	444	100	2067.78	4.1644
K01978	50	7	349.259	0.0821
K01980	433	95	2097.7	4.1491
K01983	49	8	360.707	0.0921
K01985	450	93	2018.54	3.8166
K01989	33	9	49.2893	0.1602
K01990	256	63	1064.72	4.2031
K01991	74	15	626.329	0.912
K01992	221	45	1027.47	4.5736
K01993	62	12	721.117	1.742
K01994	3		3.16436
K01995	146	12	480.006	0.1213
K01996	142	12	467.187	0.1213
K01997	145	12	471.875	0.1213
K01998	143	11	474.603	0.1113
K01999	192	19	613.823	0.2223
K02000	36	4	135.062	0.111
K02001	46	5	328.292	0.611
K02002	64	8	234.606	0.641
K02003	294	68	1272.78	3.9514
K02004	322	85	1367.3	5.7907
K02005	101	21	465.126	2.4512
K02006	156	34	610.527	0.4974
K02007	31	2	105.524	0.0101
K02008	113	23	360.357	0.36
K02009	15	2	62.7217	0.0101
K02010	82	14	447.468	0.1516
K02011	84	11	411.891	0.1414
K02012	99	17	423.758	0.1915
K02013	241	53	1024.52	1.5941
K02014	433	65	2586.74	4.3882
K02015	320	69	1217.22	1.7284
K02016	274	55	1021.73	1.603
K02017	45	6	107.083	0.082
K02018	75	11	415.046	0.0973
K02019	29	3	107.88	0.021
K02020	88	12	415.043	0.1172
K02021	6	1	6.93279	0.0001
K02022	61	3	306.388	0.08
K02023	110	4	211.42	0.13
K02024	14	1	43.3491	0.001
K02025	202	18	379.256	0.135
K02026	212	19	424.811	0.1441
K02027	179	18	356.684	0.243
K02028	145	29	360.067	0.625
K02029	246	45	532.327	1.0854
K02030	232	42	535.664	1.2404
K02031	258	34	710.154	0.3602
K02032	264	35	648.744	0.3603
K02033	272	36	636.343	0.3752
K02034	278	35	689.475	0.3652
K02035	383	61	1074.41	1.0827
K02036	102	15	557.676	0.8235
K02037	97	13	531.278	0.7234
K02038	97	12	531.278	0.7134
K02039	80	12	462.142	0.6635
K02040	119	15	728.957	1.2434
K02041	44	7	164.776	0.1231
K02042	63	10	210.724	0.2341
K02043	13	2	38.6373	0.011
K02044	56	7	168.406	0.2131
K02045	38	5	258.618	0.072
K02046	38	4	249.601	0.062
K02047	39	5	263.495	0.072
K02048	55	6	314.643	0.073
K02049	186	17	758.402	0.1303
K02050	184	21	844.548	0.1307
K02051	204	27	1083.54	0.7806
K02052	70	7	130.417	0.0911
K02053	76	7	172.33	0.0911
K02054	58	4	101.8	0.0611
K02055	88	10	211.392	0.1912
K02056	137	10	293.38	0.1324
K02057	224	18	467.57	0.2637
K02058	112	7	222.28	0.1321
K02059	1		0.671357
K02060	1		0.671357
K02061	1		0.671357
K02062	13	2	39.9013	0.011
K02063	20	3	66.8913	0.061
K02064	20	3	66.8913	0.061
K02065	79	11	611.874	0.761
K02066	86	11	604.689	0.761
K02067	87	8	532.851	0.191
K02068	29	6	88.0049	0.6121
K02069	36	7	122.198	0.6321
K02071	84	18	245.223	0.2784
K02072	82	17	230.031	0.2684
K02073	113	22	364.752	0.3994
K02074	32	7	283.309	0.7151
K02075	42	7	312.068	0.7151
K02076	11	1	18.4204	0.001
K02077	46	9	315.678	0.7153
K02078	153	30	1094.51	1.0305
K02079	2		24.4217
K02080	3	2	48.5112	0.051
K02081	7	1	26.2172	0.001
K02082	8	3	58.9816	0.0012
K02083	4	1	26.0456	0.001
K02086	16	3	51.472	0.1011
K02092	3		10.7208
K02093	4		10.9844
K02094	3		10.7208
K02095	3		10.7208
K02096	3		10.7208
K02097	3		10.7208
K02099	8	2	29.5446	0.002
K02100	5	1	28.3996	0.001
K02101	1		1.0408
K02103	4		8.16974
K02106	18	2	88.8285	0.0011
K02108	107	21	581.727	0.8394
K02109	132	22	835.824	0.8894
K02110	106	21	581.684	0.8394
K02111	106	21	581.684	0.8394
K02112	106	21	581.684	0.8394
K02113	98	20	570.958	0.8294
K02114	108	21	588.483	0.8394
K02115	107	21	588.395	0.8394
K02116	66	8	367.763	0.0831
K02117	14	8	84.782	0.6104
K02118	13	7	84.5435	0.6103
K02119	9	4	49.3268	0.0103
K02120	13	7	84.5435	0.6103
K02121	17	9	86.8183	0.6204
K02122	8	4	40.2719	0.0103
K02123	12	7	75.4885	0.6103
K02124	13	7	84.5435	0.6103
K02160	84	12	470.887	0.1442
K02164	5	1	7.03866	0.01
K02167	18	2	63.3051	0.011
K02168	29	5	443.94	0.081
K02169	47	9	207.542	0.7121
K02170	24	2	98.3103	0.051
K02171	3	1	0.407927	0.001
K02172	3	1	0.407927	0.001
K02173	4	1	25.3203	0.001
K02182	9	1	203.761	0.001
K02188	38	9	181.719	0.1512
K02189	28	6	101.345	0.0312
K02190	16	10	100.473	0.2012
K02191	12	4	41.9648	0.0202
K02192	24	3	73.004	0.061
K02193	30	2	240.632	0.011
K02194	32	2	253.77	0.011
K02195	33	2	253.481	0.011
K02196	22	2	222.896	0.011
K02197	33	2	253.939	0.011
K02198	40	2	266.349	0.011
K02199	31	3	248.19	0.021
K02200	48	3	442.233	0.021
K02203	2	1	0.468308	0.001
K02204	19	3	205.116	0.0601
K02205	4		11.1201
K02217	46	13	202.618	1.2421
K02221	79	10	420.393	0.0873
K02224	52	9	192.402	0.1512
K02225	11	1	33.5784	0.01
K02226	13	5	70.1801	0.0122
K02227	63	10	225.525	0.1612
K02228	6		7.54143
K02229	12	1	26.9852	0.01
K02230	30	2	101.082	0.02
K02231	60	11	238.861	0.1622
K02232	59	9	194.883	0.1013
K02233	62	11	247.902	0.1622
K02234	21	1	79.7112	0.01
K02236	11	3	42.7605	0.1011
K02237	65	13	215.749	0.2383
K02238	87	19	450.296	0.8783
K02239	3		8.45919
K02240	14	3	43.5696	0.1011
K02241	1		2.34868
K02242	23	6	87.0471	0.1513
K02243	13	3	36.3651	0.1011
K02244	13	3	36.3651	0.1011
K02245	13	3	36.3651	0.1011
K02246	11	3	35.5718	0.1011
K02247	3		8.45919
K02248	10	2	35.7352	0.1001
K02249	4		9.5
K02250	11	1	26.6617	0.001
K02254	2		2.12355
K02255	5	1	28.3996	0.001
K02258	24	1	214.164	0.01
K02259	50	3	342.16	0.021
K02274	76	2	609.106	0.02
K02275	76	3	616.128	0.03
K02276	64	3	430.168	0.03
K02277	6		17.3759
K02278	28	3	230.948	0.021
K02279	31	2	397.473	0.02
K02280	28	2	394.328	0.02
K02281	5		167.705
K02282	32	2	395.891	0.02
K02283	42	6	415.64	0.0221
K02284	8		17.0949
K02285	8		17.0949
K02286	5		16.304
K02287	2		7.48757
K02288	4		10.9844
K02289	3		7.75118
K02290	10		21.2486
K02291	40	4	297.753	0.12
K02292	1		2.16793
K02293	14		58.542
K02294	11	1	92.0671	0.01
K02297	23	3	63.7701	0.021
K02298	23	2	63.7701	0.011
K02299	24	2	64.0443	0.011
K02300	23	3	63.7701	0.021
K02301	63	4	379.377	0.022
K02302	25	5	56.8273	0.107
K02303	56	5	213.569	0.041
K02304	33	5	119.072	0.0212
K02305	7		12.0418
K02312	5	1	6.44218	0.005
K02313	102	19	576.285	0.8783
K02314	114	22	594.729	1.3794
K02315	16	5	108.098	0.0032
K02316	102	20	576.719	0.8784
K02317	5	1	28.3996	0.001
K02334	67	6	348.261	0.2201
K02335	106	21	623.653	0.8834
K02336	13	1	53.5442	0.001
K02337	111	21	617.672	0.8884
K02338	106	21	576.123	0.8785
K02339	37	4	268.138	0.071
K02340	101	20	573.153	0.8784
K02341	95	20	554.99	0.8784
K02342	160	29	778.836	1.7473
K02343	104	20	586.384	0.8784
K02344	10	2	39.2084	0.011
K02345	7	1	32.0048	0.001
K02346	84	18	511.545	0.7874
K02347	20	1	50.1916	0.001
K02348	36	5	164.29	0.0411
K02351	13	1	24.4433	0.01
K02352	3	1	0.629877	0.001
K02355	155	29	750.14	1.5286
K02356	114	23	620.24	1.0294
K02357	100	20	570.985	0.8784
K02358	139	26	703.115	0.9595
K02361	20	7	108.336	0.636
K02362	6	1	33.049	0.001
K02363	5	1	28.3996	0.001
K02364	6	2	31.6536	0.006
K02371	22	9	464.101	0.6213
K02372	101	19	571.227	0.7843
K02377	37	8	243.116	0.731
K02379	55	6	146.151	0.0721
K02380	18	3	63.1348	0.021
K02381	5	1	25.1345	0.001
K02383	1		12.9677
K02385	12	2	78.0892	0.0011
K02386	40	3	269.468	0.061
K02387	53	5	346.016	0.0621
K02388	53	5	348.035	0.0621
K02389	52	5	345.916	0.0621
K02390	58	6	361.144	0.1121
K02391	32	2	248.518	0.011
K02392	65	8	440.115	0.1132
K02393	42	3	292.122	0.061
K02394	42	3	292.122	0.061
K02395	30	3	128.897	0.061
K02396	52	6	347.927	0.0631
K02397	50	5	181.897	0.0621
K02398	35	4	136.083	0.0121
K02399	21	2	79.1143	0.011
K02400	56	6	347.23	0.0631
K02401	49	4	311.447	0.062
K02402	14	2	46.6895	0.011
K02403	15	2	49.9546	0.011
K02404	36	4	142.336	0.0611
K02405	45	5	175.781	0.0621
K02406	101	10	282.964	0.1651
K02407	48	6	189.738	0.0721
K02408	51	5	345.808	0.0621
K02409	53	5	345.235	0.0621
K02410	54	5	371.831	0.0621
K02411	49	5	329.666	0.0621
K02412	53	5	345.984	0.0621
K02413	35	4	148.754	0.0121
K02414	32	3	141.91	0.0111
K02415	55	4	361.139	0.0611
K02416	47	5	334.995	0.0621
K02417	64	7	576.986	0.1122
K02418	35	3	280.718	0.012
K02419	51	6	341.593	0.0721
K02420	52	5	345.896	0.0621
K02421	49	4	311.447	0.062
K02422	47	5	186.526	0.0621
K02423	13	2	50.2665	0.011
K02424	7	1	33.3675	0.001
K02425	4	1	25.1648	0.001
K02426	45	7	378.786	0.632
K02427	37	4	268.671	0.071
K02428	54	9	398.816	0.6461
K02429	28	12	184.01	1.281
K02430	9	1	36.2153	0.001
K02431	16	2	53.1713	0.0011
K02433	106	13	782.856	0.2473
K02434	76	12	415.396	0.2373
K02435	76	12	415.396	0.2373
K02436	3		0.816564
K02437	89	13	520.48	0.7072
K02438	50	7	313.358	0.0223
K02439	16	2	56.2205	0.011
K02440	50	13	211.97	0.2824
K02441	16	2	56.2205	0.011
K02442	2		4.70623
K02443	23	2	32.6457	0.0011
K02444	29	6	113.385	0.0811
K02445	29	6	95.3365	0.527
K02446	38	5	251.669	0.0261
K02448	7		12.0418
K02450	12	1	56.961	0.001
K02451	13	1	46.7645	0.001
K02452	26	3	105.103	0.012
K02453	39	6	104.948	0.0811
K02454	43	5	114.454	0.0711
K02455	35	4	106.806	0.0611
K02456	52	5	140.425	0.1111
K02457	26	2	89.7365	0.011
K02458	26	2	89.5191	0.011
K02459	26	2	89.5191	0.011
K02460	28	2	98.7776	0.011
K02461	26	3	86.8892	0.012
K02462	24	3	105.967	0.012
K02463	19	1	48.0218	0.01
K02464	5	2	31.1377	0.051
K02465	2		3.60522
K02466	10	2	31.7133	0.011
K02467	5	1	28.3996	0.001
K02468	7	2	31.6271	0.011
K02469	116	23	645.989	0.8845
K02470	107	23	591.172	0.8845
K02471	30	4	121.85	0.031
K02472	15	6	97.4287	0.652
K02473	11		101.512
K02474	19	6	159.651	0.22
K02475	8		6.1096
K02476	7		5.8176
K02477	35	7	187.743	0.5532
K02478	23	4	104.131	0.0022
K02479	7	1	23.7804	0.001
K02480	14	2	27.0645	0.011
K02481	17	5	56.4206	1.1001
K02482	13	2	36.7132	0.06
K02483	131	17	804.598	0.3132
K02484	60	18	248.558	1.3531
K02485	15	1	78.003	0.001
K02486	5	1	3.44644	0.001
K02487	17		206.17
K02488	22		208.138
K02489	1		2.16793
K02490	6		20.1803
K02491	1		1.08201
K02492	74	13	269.525	0.1681
K02493	98	20	570.268	0.8784
K02494	28	4	96.3532	0.071
K02495	163	34	725.262	0.9707
K02496	23	3	79.9865	0.061
K02497	7	1	10.1299	0.001
K02498	33	4	265.05	0.071
K02499	17	3	68.9096	0.0111
K02500	86	16	530.236	0.7732
K02501	87	17	533.823	0.7782
K02502	47	5	378.32	0.0711
K02503	78	16	504.785	0.8722
K02504	10	2	41.2623	0.011
K02505	9	2	41.1542	0.011
K02506	5	1	13.5695	0.01
K02507	8	2	38.6263	0.011
K02508	3	1	6.33899	0.01
K02509	14	2	192.594	0.02
K02510	26	1	193.046	0.01
K02511	3		3.87186
K02517	74	16	397.052	0.8411
K02518	106	21	588.133	0.8884
K02519	100	20	570.985	0.8784
K02520	101	20	572.942	0.8784
K02521	14	2	49.2727	0.011
K02523	55	11	380.85	0.761
K02525	6	1	22.6058	0.01
K02526	14	3	104.274	0.0012
K02527	58	13	377.261	0.7711
K02528	101	20	571.154	0.8784
K02529	229	36	667.96	1.6579
K02530	7	2	2.53575	0.0011
K02531		1		0.0001
K02532	12	2	39.4907	0.0011
K02533	54	5	339.461	0.072
K02535	70	14	448.96	0.7811
K02536	71	15	496.55	0.7911
K02538	3	1	0.629877	0.001
K02545	3	1	0.629877	0.001
K02546	3	1	0.629877	0.001
K02547	4	2	33.3938	0.0011
K02548	56	13	236.359	1.1572
K02549	45	6	152.525	0.047
K02550	2	1	24.7382	0.001
K02551	48	11	219.506	0.6571
K02552	38	4	142.231	0.022
K02553	34	3	254.473	0.021
K02554	15	1	39.757	0.001
K02556	65	6	414.557	0.0622
K02557	86	13	757.465	0.6833
K02558	36	7	152.089	0.181
K02560	14	2	49.0432	0.011
K02562	8	2	32.3116	0.011
K02563	100	20	537.352	0.8784
K02564	54	21	251	1.8834
K02565	9	2	31.9994	0.011
K02566	16	3	50.6511	0.0511
K02567	19	3	58.6881	0.061
K02568	19	3	58.6881	0.061
K02569	15	2	46.3643	0.011
K02570	18	3	58.444	0.061
K02571	7		11.0391
K02572	12	2	45.5342	0.011
K02573	12	3	47.8045	0.061
K02574	14	4	94.2381	0.0611
K02575	65	9	195.319	0.067
K02584	7		20.4592
K02585	12	1	20.1763	0.01
K02586	15		26.6308
K02587	12		22.1806
K02588	20	1	32.8404	0.0001
K02589	4		4.07788
K02590	4		4.07788
K02591	15		26.6308
K02592	9		10.6236
K02593	5		8.27242
K02594	11	1	48.4603	0.0001
K02595	4		6.61813
K02596	8		16.0985
K02597	5		9.90479
K02598	13	3	69.3334	0.0111
K02600	100	20	570.985	0.8784
K02601	105	20	572.07	0.8784
K02609	17	2	75.1612	0.011
K02610	16	2	68.8256	0.011
K02611	16	2	68.8256	0.011
K02612	16	2	68.8256	0.011
K02613	15	3	86.1514	0.021
K02614	19	6	94.4941	0.5811
K02615	5	1	34.6271	0.001
K02616	15	1	57.0478	0.001
K02617	4	1	28.2915	0.001
K02618	9	1	37.928	0.001
K02619	46	8	197.309	0.5672
K02621	61	12	419.726	0.8021
K02622	61	12	419.726	0.8021
K02623	8	1	24.3428	0.01
K02624	20	1	43.679	0.01
K02626	4	1	25.2594	0.05
K02628	1		2.16793
K02629	1		2.16793
K02630	1		2.16793
K02631	1		2.16793
K02632	1		2.16793
K02634	9		54.8175
K02635	11		56.2539
K02636	15		61.117
K02637	9		54.8175
K02638	9		54.8175
K02639	29		169.756
K02640	8		54.4564
K02641	10		67.7851
K02642	2		2.43154
K02643	9		54.8175
K02647	19	3	54.8448	0.003
K02650	33	4	155.87	0.0602
K02651	26	1	378.03	0.01
K02652	48	7	223.326	0.0812
K02653	53	8	237.725	0.0912
K02654	52	8	209.466	0.0871
K02655	24	3	66.0654	0.11
K02656	21	2	67.1055	0.06
K02657	15		27.8345
K02658	16		34.8615
K02659	13		30.0512
K02660	17		43.164
K02662	30	4	145.91	0.0512
K02663	37	3	144.179	0.0601
K02664	29	1	82.2611	0.05
K02665	17	1	46.2807	0.05
K02666	32	3	130.913	0.07
K02667	8		15.6069
K02668	8		15.6069
K02669	60	7	242.866	0.0731
K02670	19	2	48.9993	0.1
K02671	16	1	39.9512	0.05
K02672	20	2	64.9547	0.06
K02673	12	1	38.5277	0.05
K02674	13		39.1236
K02676	12	1	33.6577	0.05
K02679	9	2	38.7344	0.011
K02680	10	2	41.2623	0.011
K02681	9	2	38.7344	0.011
K02682	10	2	41.2623	0.011
K02686	24	4	80.0412	0.071
K02687	91	18	526.44	0.8733
K02688	8	3	74.6475	0.0111
K02689	9		54.8175
K02690	10		56.9854
K02691	9		54.8175
K02692	9		54.8175
K02693	9		54.8175
K02694	9		54.8175
K02696	7		34.4186
K02697	8		54.789
K02698	13		64.7366
K02699	9		54.8175
K02700	9		54.8175
K02702	1		2.16793
K02703	25		127.808
K02704	9		54.8175
K02705	9		54.8175
K02706	14		66.0655
K02707	9		54.8175
K02708	12		95.7407
K02709	9		54.8175
K02710	9		54.8175
K02711	9		54.8175
K02712	9		54.8175
K02713	9		54.8175
K02714	9		54.8175
K02715	9		54.8175
K02716	9		54.8175
K02717	9		54.8175
K02718	8		34.6822
K02719	8		12.1363
K02720	6		11.6091
K02722	8		54.5539
K02723	9		54.8175
K02724	9		54.8175
K02742	15	2	53.6926	0.011
K02744	7	1	1.52264	0.0001
K02745	5	2	26.0069	0.0011
K02746	5	1	25.3934	0.0001
K02747	4	1	1.29023	0.0001
K02749	11	5	70.9074	0.1161
K02750	12	6	71.5425	0.1171
K02752	4	1	28.2915	0.001
K02753	4	1	28.2915	0.001
K02755	35	18	315.939	0.5188
K02756	37	19	348.892	0.5189
K02757	35	18	348.411	0.5179
K02759	41	10	218.558	0.1117
K02760	49	13	322.548	0.112
K02761	75	20	410.687	0.812
K02763	21	5	88.1591	0.0122
K02764	18	4	53.7105	0.0121
K02765	18	4	53.7105	0.0121
K02768	51	18	322.916	0.1489
K02769	51	16	298.645	0.1388
K02770	49	16	297.418	0.1388
K02771	2		0.606481
K02773	24	9	181.565	0.1035
K02774	24	9	184.104	0.0036
K02775	27	9	166.339	0.5234
K02777	43	11	251.742	0.1275
K02778	26	4	94.0752	0.0112
K02779	23	4	90.2034	0.0112
K02781	19	5	106.26	0.1112
K02782	16	4	99.7331	0.0112
K02783	31	8	199.286	0.0224
K02784	17	4	49.6549	0.0211
K02786	7	4	1.95602	0.0112
K02787	6	4	1.93447	0.0112
K02788	6	5	1.93447	0.0113
K02790	17	5	130.606	0.0023
K02791	17	5	130.606	0.0023
K02793	44	16	411.763	0.2279
K02794	38	15	232.671	0.1279
K02795	44	16	234.526	0.1379
K02796	38	15	234.828	0.1369
K02798	22	6	124.058	0.0132
K02799	23	6	127.616	0.0132
K02800	23	6	127.616	0.0132
K02802	8	1	28.9312	0.001
K02803	30	7	94.2121	0.0232
K02804	30	7	94.2121	0.0232
K02805	12	1	203.003	0.001
K02806	48	8	311.919	0.0813
K02808	8	5	67.8791	0.2052
K02809	35	9	145.408	0.2272
K02810	35	9	145.408	0.2272
K02812	1		3.28666
K02813	2		3.30821
K02814	3		3.41631
K02815	3		3.41631
K02817	1	1	0.931383	0.0001
K02818	21	3	153.168	0.0021
K02819	20	3	153.149	0.0021
K02821	45	9	117.418	0.0931
K02822	33	9	135.07	0.0324
K02823	28	10	141.985	0.6314
K02824	50	13	209.311	0.7433
K02825	62	12	280.773	0.2563
K02826	8	1	10.2936	0.001
K02827	7	1	10.1299	0.001
K02828	7	1	10.1299	0.001
K02829	7	1	10.1299	0.001
K02834	100	20	570.985	0.8784
K02835	100	20	570.985	0.8784
K02836	94	19	527.215	0.8284
K02837	71	13	438.433	0.8031
K02838	99	20	570.381	0.8784
K02839	8	3	53.6495	0.511
K02840	2	1	24.7382	0.001
K02841	24	6	88.6086	0.131
K02843	35	9	131.334	0.1511
K02844	8	1	33.9144	0.001
K02846	6	1	28.7181	0.001
K02847	3	1	24.8463	0.001
K02848	5	1	30.167	0.001
K02849	10	2	45.7638	0.011
K02850	4	2	25.0848	0.0011
K02851	13	2	49.5779	0.011
K02852	16	3	70.9272	0.101
K02853	7	2	52.4912	0.051
K02854	6	1	28.7181	0.001
K02855	7	1	32.0048	0.001
K02856	10	4	77.9296	0.561
K02858	25	4	93.8978	0.031
K02859	8	1	23.7278	0.1
K02860	97	20	569.925	0.8784
K02862	6		20.9876
K02863	100	20	570.985	0.8784
K02864	100	20	570.985	0.8784
K02867	100	20	570.985	0.8784
K02871	100	20	570.985	0.8784
K02874	99	20	567.698	0.8784
K02876	100	20	570.985	0.8784
K02878	100	20	570.985	0.8784
K02879	100	20	570.985	0.8784
K02881	100	20	570.985	0.8784
K02884	99	19	569.78	0.8783
K02886	100	20	570.985	0.8784
K02887	100	20	570.985	0.8784
K02888	99	20	570.796	0.8784
K02890	100	20	570.985	0.8784
K02892	100	20	570.985	0.8784
K02895	100	21	570.817	0.8785
K02897	78	13	420.162	0.7571
K02899	99	20	550.225	0.8784
K02902	104	20	574.155	0.8784
K02904	100	20	570.985	0.8784
K02906	100	20	570.985	0.8784
K02907	83	19	459.574	0.8284
K02909	110	23	616.802	0.9394
K02911	99	18	547.212	0.8274
K02913	116	23	657.176	0.8796
K02914	94	18	540.809	0.8283
K02916	99	20	566.682	0.8784
K02919	90	17	537.377	0.3733
K02926	100	20	570.985	0.8784
K02931	100	20	570.985	0.8784
K02933	100	20	570.985	0.8784
K02935	98	20	569.692	0.8784
K02939	99	20	570.287	0.8784
K02945	112	20	599.787	0.8784
K02946	100	20	570.985	0.8784
K02948	99	20	567.698	0.8784
K02950	101	20	571.149	0.8784
K02952	100	20	570.985	0.8784
K02954	111	22	583.153	0.9794
K02956	101	20	577.774	0.8784
K02959	99	20	570.897	0.8784
K02961	99	20	567.698	0.8784
K02963	103	20	573.527	0.8784
K02965	100	20	570.985	0.8784
K02967	100	20	570.985	0.8784
K02968	100	20	570.985	0.8784
K02970	97	17	569.94	0.3832
K02972	4	1	28.2915	0.001
K02982	100	20	570.985	0.8784
K02986	105	20	573.274	0.8784
K02988	100	20	570.985	0.8784
K02990	100	20	570.985	0.8784
K02992	101	20	571.149	0.8784
K02994	100	20	570.985	0.8784
K02996	100	20	570.985	0.8784
K03040	102	20	573.404	0.8784
K03043	99	19	570.809	0.8684
K03046	108	20	625.627	0.8784
K03048	17	3	79.3472	0.1011
K03060	85	13	449.727	0.2374
K03070	113	23	623.093	0.8796
K03071	37	4	269.259	0.071
K03072	76	9	395.671	0.1461
K03073	96	18	522.245	0.3284
K03074	75	9	395.408	0.1461
K03075	96	19	560.545	0.8284
K03076	106	22	573.928	0.8795
K03077	8	3	72.8945	0.5011
K03078	6	2	31.1853	0.011
K03079	4	1	28.2915	0.001
K03080	5	2	36.0185	0.0011
K03081	8	3	38.994	0.0111
K03082	9	3	39.3126	0.0111
K03086	127	21	721.328	0.8884
K03087	45	2	165.345	0.011
K03088	451	84	2649.7	10.6315
[truncated: 4,009 more rows]
