# Supplementary material for: Metabolic Reconstruction for Metagenomic Data and Its Application to the Human Microbiome
Source: PLoS Comput Biol. 2012 Jun 13;8(6):e1002358. doi: 10.1371/journal.pcbi.1002358 (PMC3374609; doi:10.1371/journal.pcbi.1002358)
Supplement: Table S5 — HUMAnN relative abundance estimates for functional modules in the human microbiome. Inferred module abundance values for each of 250 KEGG modules in 649 samples spanning seven body sites across the human microbiome. (XLSX) [file pcbi.1002358.s010.xlsx]

## Sheet: humann-mpm-abd_subset
ID	NAME	SRS011132_vs_KEGG_v54-mpm-cop-nul-nve-nul-nve	SRS011263_vs_KEGG_v54-mpm-cop-nul-nve-nul-nve	SRS011397_vs_KEGG_v54-mpm-cop-nul-nve-nul-nve	SRS012291_vs_KEGG_v54-mpm-cop-nul-nve-nul-nve	SRS012663_vs_KEGG_v54-mpm-cop-nul-nve-nul-nve	SRS013155_vs_KEGG_v54-mpm-cop-nul-nve-nul-nve	SRS013269_vs_KEGG_v54-mpm-cop-nul-nve-nul-nve	SRS013637_vs_KEGG_v54-mpm-cop-nul-nve-nul-nve	SRS013876_vs_KEGG_v54-mpm-cop-nul-nve-nul-nve	SRS013956_vs_KEGG_v54-mpm-cop-nul-nve-nul-nve	SRS014464_vs_KEGG_v54-mpm-cop-nul-nve-nul-nve	SRS014682_vs_KEGG_v54-mpm-cop-nul-nve-nul-nve	SRS014901_vs_KEGG_v54-mpm-cop-nul-nve-nul-nve	SRS015051_vs_KEGG_v54-mpm-cop-nul-nve-nul-nve	SRS015269_vs_KEGG_v54-mpm-cop-nul-nve-nul-nve	SRS015430_vs_KEGG_v54-mpm-cop-nul-nve-nul-nve	SRS015450_vs_KEGG_v54-mpm-cop-nul-nve-nul-nve	SRS015640_vs_KEGG_v54-mpm-cop-nul-nve-nul-nve	SRS015752_vs_KEGG_v54-mpm-cop-nul-nve-nul-nve	SRS015793_vs_KEGG_v54-mpm-cop-nul-nve-nul-nve	SRS015937_vs_KEGG_v54-mpm-cop-nul-nve-nul-nve	SRS015996_vs_KEGG_v54-mpm-cop-nul-nve-nul-nve	SRS016033_vs_KEGG_v54-mpm-cop-nul-nve-nul-nve	SRS016188_vs_KEGG_v54-mpm-cop-nul-nve-nul-nve	SRS016292_vs_KEGG_v54-mpm-cop-nul-nve-nul-nve	SRS016434_vs_KEGG_v54-mpm-cop-nul-nve-nul-nve	SRS016513_vs_KEGG_v54-mpm-cop-nul-nve-nul-nve	SRS016553_vs_KEGG_v54-mpm-cop-nul-nve-nul-nve	SRS016581_vs_KEGG_v54-mpm-cop-nul-nve-nul-nve	SRS016752_vs_KEGG_v54-mpm-cop-nul-nve-nul-nve	SRS017044_vs_KEGG_v54-mpm-cop-nul-nve-nul-nve	SRS017156_vs_KEGG_v54-mpm-cop-nul-nve-nul-nve	SRS017244_vs_KEGG_v54-mpm-cop-nul-nve-nul-nve	SRS017451_vs_KEGG_v54-mpm-cop-nul-nve-nul-nve	SRS017697_vs_KEGG_v54-mpm-cop-nul-nve-nul-nve	SRS017820_vs_KEGG_v54-mpm-cop-nul-nve-nul-nve	SRS018312_vs_KEGG_v54-mpm-cop-nul-nve-nul-nve	SRS018369_vs_KEGG_v54-mpm-cop-nul-nve-nul-nve	SRS018463_vs_KEGG_v54-mpm-cop-nul-nve-nul-nve	SRS018585_vs_KEGG_v54-mpm-cop-nul-nve-nul-nve	SRS018671_vs_KEGG_v54-mpm-cop-nul-nve-nul-nve	SRS018784_vs_KEGG_v54-mpm-cop-nul-nve-nul-nve	SRS018981_vs_KEGG_v54-mpm-cop-nul-nve-nul-nve	SRS019019_vs_KEGG_v54-mpm-cop-nul-nve-nul-nve	SRS019039_vs_KEGG_v54-mpm-cop-nul-nve-nul-nve	SRS019067_vs_KEGG_v54-mpm-cop-nul-nve-nul-nve	SRS019087_vs_KEGG_v54-mpm-cop-nul-nve-nul-nve	SRS019119_vs_KEGG_v54-mpm-cop-nul-nve-nul-nve
RANDSID	Random subject ID	158479027	158742018	158984779	158337416	158398106	159571453	159591683	159207311	763435843	763496533	763577454	763961826	763860675	763901136	763982056	764083206	764083206	764487809	764224817	763435843	764325968	764447348	764508039	764649650	765074482	159672603	159753524	159753524	159915365	160421117	159490532	159551223	159814214	160319967	160582958	160603188	160380657	160178356	160218816	765094712	765013792	765135172	764305738	763961826	763961826	764083206	764083206	763496533
START	Recruitment date	Q1_2009	Q1_2009	Q1_2009	Q1_2009	Q1_2009	Q2_2009	Q2_2009	Q2_2009	Q1_2009	Q1_2009	Q1_2009	Q1_2009	Q1_2009	Q1_2009	Q2_2009	Q2_2009	Q2_2009	Q2_2009	Q2_2009	Q1_2009	Q2_2009	Q2_2009	Q2_2009	Q2_2009	Q2_2009	Q2_2009	Q2_2009	Q2_2009	Q2_2009	Q2_2009	Q2_2009	Q2_2009	Q2_2009	Q2_2009	Q2_2009	Q2_2009	Q2_2009	Q2_2009	Q2_2009	Q2_2009	Q2_2009	Q2_2009	Q2_2009	Q1_2009	Q1_2009	Q2_2009	Q2_2009	Q1_2009
SITE	Recruitment location	Houston	Houston	Houston	Houston	Houston	Houston	Houston	Houston	St. Louis	St. Louis	St. Louis	St. Louis	St. Louis	St. Louis	St. Louis	St. Louis	St. Louis	St. Louis	St. Louis	St. Louis	St. Louis	St. Louis	St. Louis	St. Louis	St. Louis	Houston	Houston	Houston	Houston	Houston	Houston	Houston	Houston	Houston	Houston	Houston	Houston	Houston	Houston	St. Louis	St. Louis	St. Louis	St. Louis	St. Louis	St. Louis	St. Louis	St. Louis	St. Louis
GENDER	Gender	male	female	female	female	male	male	male	male	male	male	female	male	male	female	male	male	male	male	male	male	male	male	male	female	male	male	female	female	female	male	male	male	male	female	female	male	male	male	male	male	female	male	male	male	male	male	male	male
VISNO	Visit number	1	1	1	1	1	1	1	1	1	1	1	1	1	1	1	1	1	1	1	2	1	1	1	1	1	1	1	1	1	1	1	1	1	1	1	1	1	1	1	1	1	1	2	2	2	2	2	2
STSite	Body site	Anterior_nares	Anterior_nares	Anterior_nares	Anterior_nares	Anterior_nares	Anterior_nares	Anterior_nares	Anterior_nares	Anterior_nares	Anterior_nares	Anterior_nares	Anterior_nares	Anterior_nares	Anterior_nares	Anterior_nares	Anterior_nares	Anterior_nares	Anterior_nares	Anterior_nares	Anterior_nares	Anterior_nares	Anterior_nares	Anterior_nares	Anterior_nares	Anterior_nares	Anterior_nares	Anterior_nares	Anterior_nares	Anterior_nares	Anterior_nares	Anterior_nares	Anterior_nares	Anterior_nares	Anterior_nares	Anterior_nares	Anterior_nares	Anterior_nares	Anterior_nares	Anterior_nares	Anterior_nares	Anterior_nares	Anterior_nares	Anterior_nares	Anterior_nares	Anterior_nares	Anterior_nares	Anterior_nares	Anterior_nares
StudyDay_Processed	Days processed after collection	28	7	3	14	20	1	1	8	1	2	3	3	7	6	2	1	1	2	5	85	2	9	6	7	2	1	1	1	1	1	2	5	1	29	44	44	28	36	28	3	2	7	106	153	153	126	126	222
Current_site	Sequencing location	95BIS	95BIS	95BIS	95BIS	95BIS	95BIS	95BIS	95BIS	94WAS	94WAS	94WAS	94WAS	94WAS	94WAS	94WAS	94WAS	94WAS	94WAS	94WAS	94WAS	94WAS	94WAS	94WAS	94WAS	94WAS	95BIS	93BAS	95BIS	95BIS	95BIS	95BIS	95BIS	95BIS	95BIS	95BIS	95BIS	95BIS	95BIS	95BIS	94WAS	94WAS	94WAS	94WAS	94WAS	94WAS	94WAS	94WAS	94WAS
Parent_Specimen	Parent DNA sample	700014797	700015233	700015756	700013733	700014445	700015784	700015976	700016715	700021128	700021311	700023118	700023336	700023556	700023706	700023924	700024085	700024085	700024295	700024407	700024448	700024592	700024651	700024688	700024851	700024955	700032086	700032240	700032240	700032334	700032943	700033556	700033718	700033850	700034184	700034790	700034925	700035746	700035803	700035860	700037031	700037138	700037251	700037450	700037490	700037490	700037538	700037538	700037590
Run ID	Sequencing run	61GT9AAXX	61JGUAAXX	61JCUAAXX	61JFTAAXX	61KYJAAXX	61JHCAAXX	61JFDAAXX	61KTPAAXX	620DK	61NTG	704TB	704JY	618HP	61WC7	704HN	61NMA	61VKJ	620CV	61U50	704UD	704UD	61PER	61U72	61NM5	7055E	61JDBAAXX	621H3AAXX	61JGVAAXX	61GUKAAXX	61JCWAAXX	61GT9AAXX	61JD0AAXX	61NLYAAXX	61JD7AAXX	61JHHAAXX	61JHKAAXX	61GUJAAXX	61JFLAAXX	61JBPAAXX	618H1	618HP	7055E	61TR2	704TU	61WFG	61NM5	61WFG	621F5
Lane	Sequencing lane	2	2	6	4	5	8	6	1	7	7	1	2	7	1	2	1	8	4	5	6	3	5	7	4	6	8	2	4	4	8	8	4	2	2	2	2	2	8	6	5	4	3	6	1	6	7	4	7
SRS	SRS	700014827	700015235	700015758	700013733	700014447	700015784	700015976	700016715	700021128	700021311	700023118	700023336	700023556	700023706	700023924	700024085	700024105	700024295	700024407	700024448	700024592	700024651	700024688	700024851	700024955	700032123	700032240	700032280	700032334	700032943	700033557	700033718	700033850	700034184	700034790	700034925	700035746	700035803	700035897	700037052	700037138	700037251	700037450	700037490	700037510	700037538	700037558	700037590
Mean Quality	Mean base quality	29	28	27	30	32	31	29	32		31.97	33.16	32.9	33.34	35.23	32.32	34.3	32.69	33.73		34.77	33.58	28.67	32.98		34	26	31	29	32	30	30	31	25	32	29	29	32	30	31	33.81	33.59	32.66	33.91	28.98	29.78	33.55	32.02	33.37
Number of Quality Bases	Number of quality bases	6436282718	6536545743	5594306732	5783482683	6167227706	6020124811	5944496056	5507851249		6992140153	4560518567	3607280996	5100855893	1634937318	4761305127	4784068347	5814755527	4172026984		1858199497	3624316967	5086969569	5351930413		4886811989	5842767644	5307734858	5693895947	6079144182	5663735712	6183056528	6225141145	5029635187	5686544063	5979557681	5495658663	6165914554	6174762839	6114760938	4333286848	5102526438	5577193244	3503645475	4002665215	5737758406	5207502936	4829551174	5517831431
Percent of Human Reads	Percent of human reads pre-screening	0.9386	0.9502	0.8887	0.9419	0.9405	0.9429	0.9445	0.9474		0.8197	0.8114	0.7281	0.7784	0.8209	0.8281	0.7526	0.8326	0.8387		0.8064	0.7771	0.6664	0.8238		0.813	0.9392	0.8447	0.9312	0.9452	0.9383	0.9212	0.9412	0.9039	0.9421	0.9448	0.9394	0.9477	0.9478	0.9301	0.8461	0.8326	0.8341	0.785	0.78	0.7626	0.8353	0.7921	0.8317
Unique Non-Human Bases	Number of quality bases post-human-screening	788666276	748516359	885701485	478476081	578576029	560005670	482834806	461284719		420488699	584576790	842587674	710098947	277181274	879306427	1228414505	944735349	694981463		339811618	722077142	896128008	1003957389		953309751	1312867053	5280134637	695562615	482232764	553137895	853815069	549798639	685701996	505268783	552152998	514795984	474801224	608893268	744460203	691370609	844399746	988454661	441433374	849441677	1196391849	732396100	801864492	957283532
M00001	M00001: Glycolysis (Embden-Meyerhof pathway), glucose => pyruvate	0.0270671	0.0230709	0.0226907	0.0273801	0.0292186	0.0208599	0.0258848	0.0256644	0.0244013	0.0247727	0.0234077	0.023624	0.022827	0.0231334	0.0142722	0.0246567	0.0243723	0.015167	0.0257122	0.0204161	0.0238363	0.0242901	0.0207743	0.021571	0.0245193	0.0243331	0.0208492	0.0198915	0.0219298	0.0230961	0.02471	0.0236703	0.029207	0.0231386	0.0258089	0.0233463	0.0121953	0.0249978	0.0157281	0.0269749	0.0246434	0.0261632	0.024279	0.0202567	0.0213351	0.0249107	0.024161	0.0237525
M00002	M00002: Glycolysis, core module involving three-carbon compounds	0.029017	0.0229719	0.0241311	0.0252918	0.0290836	0.0218684	0.0265858	0.0274167	0.0265638	0.0253021	0.02271	0.0242992	0.0240982	0.0221657	0.0179373	0.026577	0.0243305	0.0188841	0.0256641	0.0209792	0.0235821	0.0243548	0.0208131	0.0231378	0.0254677	0.0232039	0.0225012	0.0186556	0.0225851	0.0247857	0.0245511	0.0238509	0.0300208	0.0233125	0.0260454	0.0239395	0.0207633	0.025576	0.0195325	0.027895	0.0246019	0.0266161	0.0251292	0.0221494	0.0232144	0.026508	0.0229721	0.0239932
M00003	M00003: Gluconeogenesis, oxaloacetate => fructose-6P	0.0227027	0.0214435	0.016855	0.0182244	0.022797	0.0186008	0.019136	0.0194385	0.0280615	0.0179727	0.019973	0.0275976	0.0209294	0.00530781	0.021324	0.0244165	0.0209265	0.0238213	0.0219354	0.018643	0.0172945	0.0251622	0.014698	0.0103755	0.026676	0.0189969	0.0180453	0.0138537	0.0186464	0.0183211	0.0190439	0.0140779	0.0112407	0.0218115	0.0198186	0.0208368	0.0191163	0.0183412	0.0162849	0.0256131	0.019404	0.0278596	0.0204991	0.0203218	0.0201526	0.0257311	0.0262122	0.0177941
M00004	M00004: Pentose phosphate pathway (Pentose phosphate cycle)	0.0192098	0.0231631	0.0147675	0.0246081	0.0186991	0.0143845	0.0186178	0.0210148	0.0197053	0.0176091	0.0214667	0.0196615	0.0186783	0.0209928	0.00825784	0.0162906	0.0126258	0.0115112	0.0219678	0.0196517	0.0194675	0.0196264	0.0171785	0.0181499	0.0211062	0.0173909	0.0180187	0.0189425	0.0156995	0.018104	0.0171459	0.0187991	0.0184788	0.0200442	0.0208242	0.0153626	0.0106322	0.0177313	0.0125353	0.0205144	0.0210482	0.0239266	0.018451	0.0167953	0.0172942	0.0143441	0.0159458	0.0186383
M00006	M00006: Pentose phosphate pathway, oxidative phase, glucose 6P => ribulose 5P	0.0154873	0.0225364	0.0148601	0.0211489	0.0167384	0.0139108	0.0182433	0.0189954	0.0194551	0.014859	0.0195722	0.0188151	0.0186495	0.0209105	0.00567518	0.0134778	0.00880023	0.00943611	0.0209146	0.0203834	0.0175726	0.0177764	0.0201258	0.016189	0.0198976	0.015329	0.0157461	0.0168841	0.0131279	0.0166936	0.0167592	0.0164031	0.0163649	0.0190896	0.0200015	0.0132383	0.00833956	0.0146515	0.0119188	0.0194307	0.0212364	0.0229416	0.0147755	0.015243	0.0150288	0.0109462	0.0124581	0.0182406
M00007	M00007: Pentose phosphate pathway, non-oxidative phase, fructose 6P => ribose 5P	0.025288	0.0238256	0.014676	0.0294149	0.02118	0.0148916	0.019008	0.0235145	0.019962	0.0216085	0.0273026	0.0205876	0.0187073	0.0210758	0.015154	0.0205871	0.0223082	0.0146758	0.0231328	0.0189708	0.0218203	0.0219061	0.0149841	0.0206515	0.0224712	0.0200935	0.0210579	0.0215726	0.0195238	0.0197747	0.0175508	0.022015	0.0212171	0.0210993	0.0217175	0.0182988	0.0144277	0.0224504	0.0132192	0.0217262	0.0208633	0.025	0.0245606	0.0186996	0.0203636	0.0208012	0.0221458	0.0190536
M00008	M00008: Entner-Doudoroff pathway, glucose-6P => glyceraldehyde-3P + pyruvate	0.00947546	0	0.00552961	0	0.00413448	0	0	0	0.0019783	0.0013743	0	0.00117549	0.00728287	0.00253696	0.00315139	0.00360547	0.00292327	0	0.0110707	0	0.00806408	0.00272326	0	0	0.00146529	0	0.00481646	0.00675654	0.00930777	0.00505022	0.00915276	0	0	0.00687598	0	0.00447185	0	0	0.00743726	0	0.00585375	0.00999801	0.00524129	0.0023564	0.00375832	0	0.00144839	0.00573549
M00009	M00009: Citrate cycle (TCA cycle, Krebs cycle)	0	0	0.0115777	0	0	0.0189659	0	0	0.00528825	0.0209785	0.0144191	0.0133212	0.00572463	0.0211501	0.0132729	0.0176517	0.0232243	0.0213608	0	0.0079101	0.00194235	0.00591154	0.015285	0.0174246	0.010258	0.0148654	0.0142283	0.0160015	0.0145353	0.0180525	0.00502735	0.00877243	0.0145333	0.0122925	0	0.0160654	0	0	0.0166978	0	0	0	0	0.0162756	0.0171154	0.0152565	0.015738	0
M00010	M00010: Citrate cycle, first carbon oxidation	0.0295483	0.0286284	0.0113731	0.0306046	0.0162764	0.0190844	0.0225702	0.0225707	0.0269378	0.0229061	0.0221119	0.025833	0.020608	0.0229976	0.0220755	0.0243787	0.0252317	0.019398	0.0223498	0.0253102	0.0213092	0.024805	0.015839	0.0180165	0.0271304	0.0215912	0.018891	0.0188117	0.0187172	0.0209303	0.0180714	0.0237829	0.0159872	0.0185461	0.0272347	0.0169887	0.0291158	0.018341	0.0163688	0.0233783	0.0255659	0.0311958	0.0242336	0.0222865	0.0243305	0.0237985	0.0245545	0.0217537
M00011	M00011: Citrate cycle, second carbon oxidation	0	0	0.011704	0	0	0.0188956	0	0	0.0035552	0.0199702	0.0120867	0.0103217	0.00884487	0.0201775	0.0107104	0.0151366	0.0221662	0.0227417	0	0.0111489	0.00120961	0.00584605	0.0149696	0.0170877	0.00745703	0.0125181	0.0123805	0.0146808	0.0127919	0.0166766	0.00347124	0.00632031	0.0137749	0.0102236	0	0.015558	0	0	0.0169015	0	0	0	0.00212438	0.0140086	0.0145301	0.012551	0.0129398	0.00618743
M00012	M00012: Glyoxylate cycle	0.000436761	0.00633943	0.00795211	0	0.00458997	0.0109989	0.00095531	0.00342459	0.0141746	0.00521827	0.00842745	0.00749715	0.0105985	0.00361382	0.0203739	0.0112695	0.0134375	0.0223449	0.00722675	0.0149136	0.00122893	0.00763318	0.00166975	0.00869385	0.00278535	0.00272192	0.00218049	0.00526725	0.00974459	0.00785629	0.00983816	0.000269135	0.00377653	0.00619986	0	0.00885894	0.027354	0.000244156	0.0136688	0.00849794	0.00302241	0.0128814	0.00232172	0.00949015	0.0145303	0.007919	0.0101299	0.0096246
M00013	M00013: Malonate semialdehyde pathway, propanoyl-CoA => Acetyl-CoA	1.11813e-05	0	1.05796e-05	0	0	0	0	0	0	0	0	0	0	0	0	0	0	0	0	0	6.05295e-08	6.45143e-11	0	0	0	0	0	0	0	7.59276e-09	0	0	0	0	0	0	0	0	0	0	0	0	0	2.26859e-07	0	0	0	0
M00014	M00014: Glucuronate pathway (uronate pathway)	0	0	0	0	0	0	0	0	2.60163e-05	0	0	2.4353e-07	0	0	0	0	0	0	0	0	0	0.000543826	0	6.23919e-06	0	0	0	0	0	5.70873e-06	0	0	0	0	2.78996e-05	0	0	0	0	0	0	0	0	0	1.05403e-09	0	0	0
M00015	M00015: Proline biosynthesis, glutamate => proline	0.0227472	0.0246661	0.0154833	0.00843179	0.0116015	0.0141658	0.0211438	0.0179164	0.0251718	0.0245943	0.0243335	0.0221882	0.0181593	0.0212286	0.00855667	0.0205423	0.0161577	0.01453	0.0182097	0.022805	0.0200778	0.0251615	0.0146866	0.0178336	0.0207074	0.0208962	0.0105567	0.0168147	0.00995386	0.0159445	0.015511	0.0192483	0.0100337	0.017127	0.0232518	0.0117428	0.00994566	0.0180464	0.0131645	0.0152184	0.017467	0.0256922	0.0248825	0.0209476	0.0121077	0.0211032	0.0182259	0.0170682
M00016	M00016: Lysine biosynthesis, aspartate => lysine	0.00985862	0.0142044	0.00931439	0.0098258	0.00570999	0.00738772	0.00982045	0.00916086	0.00965535	0.0110462	0.0117311	0.00977259	0.00895052	0.0143976	0.00918273	0.017409	0.0211483	0.0251555	0.0137334	0.00838068	0.00812277	0.010536	0.0122141	0.00893292	0.0153001	0.00967078	0.00713003	0.0121932	0.0154022	0.00861626	0.0152806	0.0116061	0.0102109	0.0099857	0.011859	0.00789265	0.011653	0.00817877	0.0147943	0.0119228	0.00926351	0.0126226	0.0125191	0.0105145	0.00915771	0.0150737	0.0110862	0.00864149
M00017	M00017: Methionine biosynthesis, apartate => homoserine => methionine	0.00212062	0	0.0102845	0.0053854	0.00948099	0.00985213	0	0.00433786	0.000371502	0	0.00666396	0.00158748	0.009724	0.00353374	0.00510652	0.00343992	0.00549477	0.00513618	0.00921492	0.00100407	0.00704903	0.00257429	0.00796843	0.00788643	0.00197848	0.0104335	0.0161006	0.00883743	0.00918235	0.00433015	0.00961306	0.00410154	0.00800999	0.00853819	0.0055483	0.00751702	0	0.0070428	0.00817414	0.0121453	0.00953703	0.00141495	0.00480804	0.00386012	0.00668085	0	0.00542481	0.00725899
M00018	M00018: Threonine biosynthesis, apartate => homoserine => threonine	0.028835	0.0276666	0.0209444	0.0292271	0.022679	0.0191572	0.026499	0.0266679	0.0262076	0.0255383	0.024298	0.0255138	0.0213504	0.0230441	0.0216948	0.0237931	0.0202461	0.0252237	0.0234599	0.0258989	0.0217472	0.0265031	0.0185601	0.0214892	0.0273214	0.020278	0.0182702	0.0175771	0.0188881	0.0210053	0.0212625	0.023334	0.0163245	0.0213866	0.0270489	0.0189101	0.0285998	0.0212451	0.0163765	0.0259103	0.0232589	0.0228853	0.023192	0.0224745	0.0216071	0.0255429	0.0218451	0.0227765
M00019	M00019: Leucine biosynthesis, pyruvate => 2-oxoisovalerate => leucine	0	0	0.00278611	0	0	0	0	0	0	0	0	0	0.0138495	0.00437026	0	0	0	0	0.00309338	0	0.00339267	0.0117636	0.00887169	0	0	0	0.0118815	0.0104135	0	0	0.00550629	0	0.00340001	0.00952816	0	0.00527909	0	0.00726985	0.00536381	0	0	0	0	0.0139724	0	0.0118039	0.0161965	0.0155747
M00021	M00021: Cysteine biosynthesis, serine => cysteine	0.0220345	0.0191046	0.0235427	0.0297884	0.013187	0.0179405	0.0226921	0.019348	0.0217794	0.0340754	0.0200817	0.021133	0.0188653	0.0203036	0.018967	0.0217219	0.0217556	0.0227026	0.0172933	0.0177924	0.0184647	0.0218075	0.0187224	0.0173745	0.0227563	0.0247529	0.0201764	0.0187725	0.0203455	0.0198845	0.0171866	0.0258922	0.0127962	0.0190612	0.0222242	0.0169689	0.0131383	0.0256549	0.0194781	0.0160291	0.0270063	0.0236479	0.0208425	0.0170616	0.0163422	0.0209006	0.0217447	0.0215274
M00022	M00022: Shikimate pathway, phosphoenolpyruvate + erythrose-4P => chorismate	0.0196023	0.0208363	0.0179405	0.0219278	0.0120913	0.016487	0.0191747	0.0225338	0.0189616	0.0145879	0.0158996	0.0189492	0.0135279	0.0198958	0.0156351	0.0191725	0.0189617	0.0203366	0.0148969	0.0152125	0.0165831	0.017636	0.0172509	0.0174177	0.0184068	0.018076	0.0135886	0.0145957	0.019279	0.0146152	0.0134498	0.0182752	0.0116109	0.0159499	0.0204726	0.0137621	0.0148939	0.0190389	0.0153418	0.0165247	0.0160255	0.0175964	0.0201877	0.0159881	0.0146898	0.0176646	0.0174085	0.0165579
M00023	M00023: Tryptophan biosynthesis, chorismate => tryptophan	0.0110074	0.0124835	0.0210585	0.0121596	0.0114434	0.0166412	0.0120562	0.0156573	0.0260392	0.0113701	0.0139997	0.0250671	0.0138421	0.00796288	0.0178677	0.012894	0.0134297	0.0178004	0.0134439	0.0159138	0.0126949	0.0205591	0.013424	0.0133186	0.0204687	0.0163418	0.0132392	0.0098568	0.00873973	0.0154811	0.0129962	0.0102665	0.0100248	0.0161988	0.016272	0.0134221	0.019834	0.0151324	0.0130116	0.0159469	0.0172203	0.0275749	0.00976029	0.0126033	0.0117258	0.0160511	0.0120732	0.0120498
M00024	M00024: Phenylalanine biosynthesis, chorismate => phenylalanine	0.00262947	0.00205109	0.00902674	0	0.00107432	0.0109566	0.00559215	0.00377981	0.000219497	0.0103446	0.00120229	0.00497535	0.00297714	0.00100458	0.0158053	0.00396394	0.00837637	0.0160926	0.00148252	0.00131685	0.000933361	5.32492e-05	0.00236307	0.00696499	1.4135e-06	0	0.00182559	0.00107699	0.00674259	0.00433822	0.00126264	0.000368796	0.000642961	0.00205222	0.000149403	0.0062153	0.0161282	0.00319969	0.0125542	0.00172344	0.00143743	0.000108024	0.00193054	0.00348881	0.00560371	0.00374794	0.00331174	0.00192009
M00025	M00025: Tyrosine biosynthesis, chorismate => tyrosine	0.00317952	0.00287107	0.00998272	0	0.00143098	0.0122432	0.00680218	0.00532712	0.000314074	0.01359	0.00168318	0.00634155	0.00377067	0.00152393	0.012238	0.0049285	0.00906262	0.0130363	0.00196693	0.00185949	0.00122955	0.00174499	0.00424755	0.00807732	6.78619e-05	0	0.00249667	0.0015524	0.00709378	0.00542763	0.00166911	0.00113592	0.00133707	0.00265334	0.000808749	0.00728614	0.0155196	0.00409838	0.0122253	0.0023708	0.00198614	0.00017931	0.00254041	0.00453106	0.00634974	0.00474231	0.00417843	0.00246978
M00026	M00026: Histidine biosynthesis, PRPP => histidine	0	0	0.00288989	0	0.00141898	0	0.00184785	0.00401079	0.000829433	0.00513363	0	0.00568184	0.00322499	0.00432657	0.00627207	0.00506909	0.00667192	0	0.000419544	0.00318294	0.00192921	0.0017525	0	0.00778476	0.00105203	0.0070686	0	0	0.00270628	0	0	0.00101377	0.0059912	0.00407815	0	0	0	0.00124775	0.0111284	0.00629068	0.00509733	0.00281515	0.00131417	0.00816029	0.0030641	0.00469443	0.00161938	0.00161907
M00027	M00027: GABA (gamma-Aminobutyrate) shunt	0	0.00158357	0.000116822	0.00160491	0.000403482	0.00178191	0.002425	0.00265781	0.000539964	0.00157717	0.00561144	0.00228646	0.00559086	0.000984778	0.00124011	0.00187863	0.00466382	7.28717e-05	0.00100206	0.00861367	0.00114445	0.00472026	0.00296747	0.00403577	0.00235071	0.00439274	0.00272778	0.00091526	0.00303134	0.00268882	0.00181953	0.000648284	0	0.00238024	0.000868778	0.000611729	0.000219008	0.00161414	5.85054e-05	0.00388651	1.28796e-06	0.00216253	0.00137943	0.0042338	0.00305584	0.00303371	0.00528861	0.00532164
M00028	M00028: Ornithine biosynthesis, glutamate => ornithine	0.00926172	0.017325	0.00862731	0.0171008	0.01346	0.0140709	0.0218315	0.00986409	0.0181296	0.00481633	0.0151376	0.0177449	0.0115923	0.0121107	0.00649012	0.016997	0.0174732	0.00770575	0.0163786	0.0127598	0.0131049	0.0147717	0.0144687	0.0111055	0.0213897	0.0122144	0.0167218	0.0136606	0.0196538	0.016701	0.0137007	0.0189941	0.012769	0.0115751	0.0178319	0.0128121	0.0145826	0.0169631	0.00647782	0.0193369	0.0157711	0.0191186	0.0111508	0.011913	0.0135431	0.0149801	0.0155204	0.0131677
M00029	M00029: Urea cycle	0.00279836	0.00345972	0.000343465	0	5.23068e-06	0.00427563	0.0135086	0	1.89592e-05	0.00604561	0.00804013	0.00285934	0.00809843	0.00147392	0	0.00292111	0.000867493	0.000281652	0.000922346	0.011149	0.00029223	0.00460051	0.00252131	0.00457974	0.0027355	0.00350961	0.00585639	0.0035534	0.0133818	0.00292386	0.00129613	0.0077435	0	0.00183143	9.19622e-05	0.000483734	0	0.00742913	0.019192	0.00267928	4.31198e-05	0.000936522	0.00275522	0.00551118	0.00895267	0.00126006	0.00342993	0.0144739
M00030	M00030: Lysine biosynthesis, 2-oxoglutarate => 2-aminoadipate => lysine	0	0	0	0	0	0	0	0	8.06812e-06	0	0	0.000190219	0.000790959	0	0	0	0	0	0	0.000501136	9.13785e-05	0.000559515	0	0.000422126	3.40381e-05	0	0	0	0	0.000158545	3.20577e-05	0	0	0.000105954	0	0	0	0	0	0	0	0.000236572	0	0.00122097	0.000155354	0	0	0.000535966
M00031	M00031: Lysine biosynthesis, archaea, 2-aminoadipate => lysine	0	0	0	0	0	0	0	0	0	0	0	0	0	0	0	0	0	0	0	0	0	0	0	0	0	0	0	0	0	0	0	0	0	0	0	0	0	0	0	0	0	0	0	0	0	0	0	0
M00032	M00032: Lysine degradation, lysine => saccharopine => acetoacetyl-CoA	0	0	1.29845e-05	0	0.000260443	0.00011594	0	0	6.87128e-05	0	0	0.000241701	0.000870196	0	0	5.69851e-05	0.00018909	0	0.00014941	0.00052654	0.000297235	0.00067988	0	0.000523275	4.43499e-05	0	0	0	5.75308e-07	0.000393405	0.000128957	0.000177039	0	0.000273879	0	1.28153e-05	0	7.81725e-12	0	0	0.000351568	0.000652535	0.000467178	0.00142865	0.000234899	0.000260909	0.000212871	0.000469574
M00033	M00033: Ectoine biosynthesis	0	0	0	0	0	0	0	0	0	0	0	6.84701e-05	0	0	0	0	0	0	0	0	0	0	0	0	0	0	0	0	0	0	0	0	0	0	0	0	0	0	0	0	0	0	0	0	0	0	0	0
M00034	M00034: Methionine salvage pathway	0	0	0	0	0	0	0	0	0	0	0	4.61891e-05	8.26271e-05	0	0	0	0	0	0	3.0986e-07	0	0	0	0	0	0	0	0.00168895	0	0	0	0	0	0	0	0	0	0	0	0	0	0	0.000554512	0	2.81147e-07	0	0	0
M00035	M00035: Methionine degradation	0.00261593	0.00797705	0.0113908	0	0.0060577	0.0124641	0.00106685	0.013774	0.00125704	0.0138371	0.00641899	0.00596455	0.00655918	0.00508333	0.0173609	0.00435714	0.00356534	0.0280041	0.0109291	0.00874852	0.0115037	0.00409018	0.0142504	0.0094649	0.00172319	0.00685892	0.00495611	0.00484103	0.00881622	0.00866034	0.0085373	0.00306043	0.0153995	0.00874544	0.00576331	0.00767459	0.0216915	0.0116566	0.0121181	0.0112445	0.00535622	0.00725543	0.00238186	0.0082625	0.00960496	0.00527332	0.0043716	0.00597348
M00036	M00036: Leucine degradation, leucine => acetoacetate + acetyl-CoA	0	0	0.00061616	0	0.000200943	6.22644e-05	0	0	5.25297e-05	0	0	4.94657e-07	5.98517e-05	0.00127612	0.000166375	0	0	0	0.000251218	9.90923e-05	0.00085418	8.92217e-07	0	0	0	0	0	0	0	0	0.000281759	0	0	6.75505e-05	0.00021654	1.76429e-05	0	0.000839019	0.000330621	0	0	0.000281939	0	6.38121e-05	0	0	0	0.000298892
M00037	M00037: Melatonin biosynthesis, tryptophan => serotonin => melatonin	0	0	0	0	0	0	0	0	0	0	0	0	0	0	0	0	0	0	0	0	0	7.02932e-11	0	0	0	0	0	0	0	0	0	0	0	0	0	0	0	0	0	0	0	0	0	0	0	0	0	0
M00038	M00038: Tryptophan metabolism, tryptophan => kynurenine => 2-aminomuconate	0	0	0	0	0	0	0	0	0	0	0	0	0	0	0	0	0	0	0	0	0	0	0	0	0	0	0	0	0	0	0	0	0	0	0	0	0	0	0	0	0	0	0	0	0	0	0	0
M00039	M00039: Lignin biosynthesis, cinnamate => lignin	0	0	0	0	0	0	0	0	0	0	0	0	0	0	0	0	0	0	0	0	0	0	0	0	0	0	0	0	0	0	0	0	0	0	0	0	0	0	0	0	0	0	0	0	0	0	0	0
M00042	M00042: Catecholamine biosynthesis, tyrosine => dopamine => noradrenaline => adrenaline	0	0	0	0	0	0	0	0	0	0	0	0	0	0	0	0	0	0	0	0	0	0	0	0	0	0	0	0	0	0	0	0	0	0	0	0	0	0	0	0	0	0	0	0	0	0	0	0
M00044	M00044: Tyrosine degradation, tyrosine => homogentisate	0	0	0	0	0	0	0	0	0	0	0	0	0	0	0	0	0	0	0	0	0	0	0	0	0	0	0	0	0	0	0	0	0	0	0	0	0	0	0	0	0	0	0	3.17734e-14	0	0	0	0
M00045	M00045: Histidine degradation, histidine => N-formiminoglutamate => glutamate	0.0139952	0.018631	0.00538029	0.0221077	0.00950558	0.0129496	0.0189408	0.0176905	0.0221038	0	0.0167325	0.0172553	0.0108691	0.0179738	0.0175292	0.00653706	0.00171473	0.00749448	0.0143782	0.0159551	0.0155255	0.0183326	0.0101987	0.0140788	0.0128796	0.0128103	0.0117648	0.0133016	0.0153924	0.0113349	0.0152159	0.0131815	0.00514802	0.0109924	0.0142457	0.00700702	0.00763295	0.0129138	0.0139391	0.0127807	0.0164423	0.015633	0.0124858	0.0130434	0.00365335	0.00990021	0.00523395	0.00723768
M00046	M00046: beta-Alanine biosynthesis, cytosine / uracil => beta-alanine	0	0.000301106	0	0	0	0	0	0	0	0	0	0.000373467	0.000413919	0	0	0	0	0	0.000202118	0	0.000329947	0	0	1.93232e-05	0	0	0	0	0	1.7746e-05	0.000448224	4.22564e-05	0	0.000229775	0.000380411	7.543e-05	0	0	0.000657187	0	0	0	0	0.000471081	0.000126885	0.000916381	0	0.000460633
M00048	M00048: Inosine monophosphate biosynthesis, PRPP + glutamine => IMP	0.0286429	0.02378	0.0256694	0.0261745	0.0161222	0.0231968	0.0272958	0.0255751	0.0277691	0.0257767	0.0276214	0.0286677	0.0217279	0.0263368	0.0217176	0.02711	0.0251775	0.0273023	0.0228028	0.0258386	0.0232755	0.03048	0.0225932	0.0212146	0.0274189	0.0243241	0.0195185	0.0208182	0.0262767	0.0249035	0.019212	0.0244242	0.0154781	0.0235492	0.0259776	0.0209596	0.0239163	0.0253362	0.0236094	0.0237763	0.0267141	0.0249172	0.028997	0.0233622	0.0187209	0.0275485	0.0266869	0.0229304
M00049	M00049: Adenine nucleotide biosynthesis, IMP => ADP/dADP,ATP/dATP	0.0301693	0.0285961	0.0261575	0.0259315	0.0302137	0.0229313	0.0281461	0.0272153	0.021452	0.0298249	0.0271825	0.0152993	0.0239811	0.0237675	0.0156379	0.0232096	0.0248121	0.0220931	0.0258767	0.0181631	0.0253322	0.0255616	0.022503	0.0218409	0.0240606	0.0230684	0.0238275	0.0196971	0.0218611	0.0240087	0.0277236	0.0257709	0.0365973	0.0239786	0.0281342	0.0263421	0.0218818	0.0279739	0.0211211	0.0292189	0.0280984	0.0182417	0.0290281	0.024337	0.0220072	0.0283919	0.0271348	0.0242025
M00050	M00050: Guanine nucleotide biosynthesis, IMP => GDP/dGDP,GTP/dGTP	0.0274492	0.0300618	0.0255719	0.0242122	0.0284761	0.0224671	0.0259476	0.0252255	0.0201531	0.0240394	0.0223736	0.014775	0.0230003	0.0236504	0.0156133	0.0229824	0.027048	0.0229469	0.0256171	0.0177656	0.024619	0.024717	0.0204441	0.0244454	0.0219404	0.0232356	0.0262253	0.0210576	0.0232967	0.0244218	0.0257787	0.0271759	0.0333915	0.0222043	0.024615	0.0243622	0.0264528	0.026404	0.0198149	0.0259329	0.0299494	0.0179352	0.0267706	0.0223686	0.0208665	0.0270675	0.0249614	0.0246679
M00051	M00051: Uridine monophosphate biosynthesis, glutamine (+ PRPP) => UMP	2.47699e-05	1.63102e-05	0.0127463	0.00251144	0.00674445	0.012543	0.000170318	0.000941814	0.00248508	0.00785143	0.0118922	0.00399477	0.0125893	0.00569783	0.0084411	0.0178161	0.0235801	0.0131031	0.00255832	0.0171027	0.000852753	0.00761262	0.00227482	0.00738084	0.00251979	0.0147492	0.0178951	0.0152521	0.0213388	0.00227485	0.00848395	0.00577807	4.27342e-05	0.0123133	0.0118889	0.00682199	0	0.0006054	0.0183196	0.00145374	0.00172333	0.00764885	0.012352	0.00890728	0.00887598	0.0195344	0.0164072	0.00903391
M00052	M00052: Pyrimidine ribonucleotide biosynthesis, UMP => UDP/UTP,CDP/CTP	0.027065	0.026223	0.0217745	0.0157473	0.0213252	0.0194824	0.0223609	0.0248492	0.0123629	0.0222422	0.0243624	0.0155212	0.0198021	0.0217985	0.0232906	0.0244891	0.0261727	0.0150227	0.0211739	0.0178696	0.0210441	0.0162328	0.0220264	0.0217037	0.0194016	0.018576	0.0235675	0.0225479	0.0180914	0.0202059	0.0215792	0.025662	0.0271411	0.018954	0.0248893	0.020198	0.0192681	0.0220812	0.0192017	0.0253724	0.0221176	0.0184565	0.0227237	0.0189902	0.0204658	0.0233444	0.0250086	0.0201209
M00053	M00053: Pyrimidine deoxyribonuleotide biosynthesis, CDP/CTP => dCDP/dCTP,dTDP/dTTP	0.0266242	0.0248917	0.023185	0.0101917	0.0249904	0.021766	0.0177246	0.0248855	0.0224917	0.0244303	0.021603	0.0169134	0.0221475	0.014253	0.0171733	0.0270276	0.0191396	0.0162844	0.0231486	0.0178235	0.0217358	0.0242401	0.0163343	0.0186961	0.0250178	0.0189642	0.00786995	0.00450255	0.0158738	0.0215622	0.0215102	0.0179709	0.0251176	0.0233818	0.0241464	0.0232639	0.0229665	0.0217126	0.0199103	0.029054	0.0268403	0.0206609	0.0251576	0.0223343	0.0237137	0.0270043	0.0217057	0.0218537
M00055	M00055: N-glycan precursor biosynthesis	0	0	0	0	0	0	0	0	0	0	0.00132534	0.00055829	0.00287115	0	0	0	0	0	0	0.00464956	0	0.00101687	0	0	0	0	0	0	0	0.00035522	0	0	0	0	0	0	0	0	0	0	0	0	0	0.00126161	5.22519e-05	0	0	0.00204171
M00056	M00056: O-glycan biosynthesis, mucin type core	0	0	0	0	0	0	0	0	0	0	0	0	0	0	0	0	0	0	0	0	0	0	0	0	0	0	0	0	0	0	0	0	0	0	0	0	0	0	0	0	0	0	0	0	0	0	0	0
M00057	M00057: Glycosaminoglycan biosynthesis, linkage tetrasaccharide	0	0	0	0	0	0	0	0	0	0	0	0	0	0	0	0	0	0	0	0	0	0	0	0	0	0	0	0	0	0	0	0	0	0	0	0	0	0	0	0	0	0	0	0	0	0	0	0
M00058	M00058: Glycosaminoglycan biosynthesis, chondroitin sulfate backbone	0	0	0	0	0	0	0	0	0	0	0	0	0	0	0	0	0	0	0	0	0	0	5.20136e-05	0	0	0	0	0	0	0	0	0	0	0	0	0	0	0	0	0	0	0	0	0	0	0	0	0
M00059	M00059: Glycosaminoglycan biosynthesis, heparan sulfate backbone	0	0	0	0	0	0	0	0	0	0	0	1.51503e-10	0	0	0	0	0	0	0	0	0	0	0	0	0	0	0	0	0	0	0	0	0	0	0	4.70444e-06	0	0	0	0	0	0	0	0	0	5.67042e-06	0	0
M00060	M00060: Lipopolysaccharide biosynthesis, KDO2-lipid A	0	0	0.00537443	0	0	0.00572825	0	0.00127922	0	0.000316819	0	0.00220754	0.000624682	0.000921813	0.0106505	0.00267821	0.00169204	0.00933128	0.000128672	0	0.000448489	0	0	0.00107666	0	0	0	0.00101488	0	0	0	0.000245624	0.000530878	0.00248349	0	0.00343479	0.00582668	0	0.0123693	0	0	0	0.000775441	0.00148009	0.00351321	0.00176273	0.00415257	0.000803793
M00061	M00061: Uronic acid metabolism	0	0	8.94874e-05	0	0	0	0	0	0.000328439	0	0	0	5.35473e-05	0	0.000529502	0.00101103	0	0	0	0	0	1.31404e-05	0	0	0	0.00220858	0.00378773	0.00327829	0	0	0	0.000159357	0	0	0	0.000282826	0	0	0.000327815	0	0	0	0	7.0397e-05	1.99771e-05	0.000571401	0.00313204	0
M00064	M00064: ADP-L-glycero-D-manno-heptose biosynthesis	0	0	0.00111508	0	0	0	0	0	0.000159272	0	0.000133824	8.92167e-06	0.000356164	0.000577278	0.000337615	0.00396287	0.00459353	0	0.00011643	0.000464984	0.000303934	0	0	9.2633e-05	5.05305e-05	0	0	0.00135149	0.0056174	0.000167091	0	0	0	0.00226986	0	0.000444151	0	0	0.00444265	0	0	0	0.000385046	0.000336339	0.000134013	0.00273477	0.00399488	0.000484642
M00065	M00065: GPI-anchor biosynthesis, core oligosaccharide	0	0	0	0	0	0	0	0	0	0	0	0.00041958	0	0	0	0	0	0	0	0	0	0	0	0.000654611	0	0	0	0	0	0	0	0	0	0.000192752	0	0	0	0	0	0	0	0.00134155	0	0	0	0	0	0
M00070	M00070: Glycosphingolipid biosynthesis, lacto-series, LacCer => Lc4Cer	0	0	0	0	0	0	0	0	0	0	0	0	0	0	0	0	0	0	0	0	0	0	0	0	0	0	0	0	0	0	0	0	0	0	0	0	0	0	0	0	0	0	0	0	0	0	9.78085e-06	0
M00071	M00071: Glycosphingolipid biosynthesis, neolacto-series, LacCer => nLc4Cer	0	0	0	0	0	0	0	0	0	0	0	0	0	0	1.35603e-05	0	0	0	0	0	0	0	0	0	0	0	0	0	0	0	0	0	0	7.83191e-06	0	0	0	0	0	0	0	0	0	0	0	0	0	0
M00072	M00072: Oligosaccharyltransferase	0	0	0	0	0	0	0	0	0	0	0	0	0	0	0	0	0	0	0	0	1.81079e-05	0	0	0	0	0	0	0	0	0	0	0	0	0	0	0	0	0	0	0	0	0	0	1.09935e-07	0	0	0	0
M00074	M00074: N-glycan biosynthesis, high-mannose type	0	0	0	0	0	0	0	0	0	0	0	0	0	0	0	0	0	0	0	0	0	0	0	0	0	0	0	0	0	0	0	0	0	0	0	0	0	0	0	0	0	0	0	0	0	0	0	0
M00075	M00075: N-glycan biosynthesis, complex type	0	0	0	0	0	0	0	0	0	0	0	0	0	0	0	0	0	0	0	0	0	0	0	0	0	0	0	0	0	0	0	0	0	0	0	0	0	0	0	0	0	0	0	0	0	0	0	0
M00076	M00076: Dermatan sulfate degradation	0	0	0	0	0	0	0	0	0	0	0	0	0	0	0	0	0	0	0	0	0	0	0	0	0	0	0	0	0	0	0	0	0	1.60662e-06	0	0.000115771	0	0	0	0	0	0	0	0	0	0	0	0
M00077	M00077: Chondroitin sulfate degradation	0	0.000281029	0.000186263	0	0.000216992	0	0	0	9.36174e-06	0	0	1.63859e-06	0.000101573	0	9.58305e-05	0	0	0	0.000369473	0	6.69045e-05	3.01916e-08	0	3.10189e-06	0	0	0	3.73224e-08	0	2.16725e-05	0.000639389	0	0.000730733	4.36995e-05	0	0.000137202	0	0	0	2.86674e-06	0	0	2.56809e-05	0	1.64251e-08	0	0	6.31947e-06
M00078	M00078: Heparan sulfate degradation	0	0	0	0	0	0	0	0	0	0	0	0	0	0	0	0	0	0	0	0	0	0	0	0	0	0	0	0	0	0	0	0	0	0	0	0	0	0	0	0	0	0	0	0	0	0	0	0
M00079	M00079: Keratan sulfate degradation	0	0	6.96885e-05	0	0	0	0	0	2.80826e-06	0	0	0	3.58908e-08	7.92192e-06	1.91396e-05	0	0	0	9.94767e-07	0	3.2771e-07	0	0	0	0	5.43489e-05	0	6.07916e-07	0	1.48808e-05	2.88321e-05	0	3.65345e-05	1.61238e-05	1.8718e-05	6.20222e-05	0	0	0	0	0	0	5.97524e-05	1.96617e-06	3.76127e-06	0	0	0
M00080	M00080: Lipopolysaccharide biosynthesis, inner core => outer core => O-antigen	0	0	0	0	0	0	0	0	0	0	0	0	0	0	0	0	0	0	0	0	0	0	0	0	0	0	0	0	0	0	0	0	0	0	0	0	0	0	0	0	0	0	0	0	0	0	0	0
M00082	M00082: Fatty acid biosynthesis, initiation	0	0.000355531	2.30052e-06	0	7.81583e-05	0	0	0	0.000102344	0	4.77227e-07	3.64887e-05	1.98622e-08	7.12124e-06	0	0	0	0	9.22469e-06	6.12494e-06	3.55289e-05	2.98086e-09	0	6.53953e-07	0	1.48246e-05	0	0	4.16288e-05	8.19566e-07	8.43987e-05	0	0	1.00522e-05	0	1.368e-05	0	0	1.80775e-07	1.91274e-05	0	2.07069e-06	1.14946e-06	2.39689e-11	5.70024e-07	2.39856e-05	6.17092e-05	0
M00083	M00083: Fatty acid biosynthesis, elongation	0.00465687	0.00843304	0.0161704	0.00646752	0.0212309	0.0145848	0.011788	0.00453784	0.00593123	0.00685564	0.000878625	0.0050688	0.00768059	0.00440231	0.0164388	0.00339946	0.00996293	0.0154175	0.0107906	0.00334117	0.00845982	0.00172484	0.0159413	0.0123737	0.00439268	0.0101135	0.0147934	0.00720651	0.0180138	0.012749	0.0157495	0.00913612	0.0185022	0.00754721	0.00995998	0.0152366	0.0225327	0.0131438	0.0190873	0.00931562	0.00921513	0.00322751	0.00699311	0.00365263	0.00840753	0.00530252	0.0079021	0.00962017
M00085	M00085: Fatty acid biosynthesis, elongation, mitochondria	0	0	4.77319e-06	0	0	0	0	0.000117547	0.000148969	0	0.000275511	0.000139918	0	0	1.34821e-06	0.000119171	0	0	0.000236871	0.000957133	4.07877e-07	0	3.49649e-06	0.000393698	3.68091e-05	0	0	2.40294e-06	0	0.00016675	0.000155392	0	0	3.26527e-05	2.69417e-07	4.35173e-05	0	0	0	0	0	0.000242387	0	0	0	4.18429e-05	0	0.000509674
M00087	M00087: beta-Oxidation	0.000525051	0.00192353	0.00140261	0.000162767	0.002993	0.00170014	0.00132089	0.00126726	0.00317259	0.00149079	0.00292523	0.0019406	0.00400143	0.00191101	0.00244646	0.00273169	0.00432443	0.00996947	0.00410387	0.00500071	0.0010803	0.00292425	1.23064e-05	0.00275009	0.000777557	0.000432452	0.00128151	0.00149184	0.00446439	0.00216011	0.0053579	0.00152261	0.000209739	0.00226911	0.00023476	0.00171798	0.00178793	0.00142167	0.00350679	0.00229764	0.000252352	0.00435288	0.000809013	0.00271492	0.00315169	0.00215683	0.00239136	0.00276787
M00088	M00088: Ketone body biosynthesis, acetyl-CoA => acetoacetate/3-hydroxybutyrate/acetone	0	0	0	0	0	0	0	0	0	0	0	0	0.00103157	0	0	0	0	0	0	0	0	0	0	0	0	0	0	0	0	0	0	0.000331583	0	0.000303632	0	0	0	0	0	0	0	0	0	0	0	0	0	0
M00089	M00089: Triacylglycerol biosynthesis	0	0	0	0	4.77792e-05	0	0	0	0	0	0.00035063	0.000147064	0.000727034	9.52823e-05	0.000120562	0	0	0	0	0.00190965	7.63272e-07	1.60827e-05	0	4.98403e-05	4.54827e-06	0	6.15465e-05	1.30355e-05	0	0.000100349	0	7.4759e-05	0	0	0	0	0	0	0	0	0	0	0	0.0002298	0.000782526	0.000250722	0	0.000306127
M00090	M00090: Phosphatidylcholine (PC) biosynthesis, choline => PC	0	0	0	0	5.01756e-09	5.26776e-09	0	0	0	0	0.000104052	0.00010409	0.000489392	0	5.38189e-06	0	0	0	0	0.000782496	4.09348e-06	0.00012575	0	0.00018851	0.000135199	3.14753e-06	0	1.18134e-06	0	0.000109061	0	0	0	1.85015e-05	0	0	0	0	0	0	0	0	0	6.65193e-05	2.25345e-05	0	0	0.000227747
M00092	M00092: Phosphatidylethanolamine (PE) biosynthesis, ethanolamine => PE	0	0	2.95866e-06	0	0	0	0	0	0	0	0	5.81166e-07	0	0	0	0	0	0	0	7.89384e-05	3.66082e-07	9.17735e-08	0.00024724	0	0	0	0	5.14001e-09	0	3.64015e-05	3.96537e-05	0	0	0	0	0	0	0	0	0	0	0	0	8.72122e-07	1.99678e-07	0	0	3.66892e-06
M00094	M00094: Ceramide biosynthesis	0	0	0	0	7.89559e-05	0	0	0	5.02545e-07	0.000160837	0.000769381	0.000160434	0.000808548	0	0	0	0	0	0	0.0011697	8.47493e-06	0.000241488	0	7.43265e-06	0.000221714	0	0	0.000117484	0	6.6479e-05	0	0	0	0	0	0	0	0	0	0.000160864	0	0.000984385	0	5.64823e-07	0.000352168	0	0	0.00108351
M00095	M00095: C5 isoprenoid biosynthesis, mevalonate pathway	0	0	0.000172838	0.00221179	0.011641	0.00508311	0	0.00167465	0.00160364	0.000862963	0.00433004	0.0013116	0.00695053	0	0.00199017	0.00278507	0	0	0.00651306	0.00793449	0.00457407	0.00281948	0.00557746	0.00479519	0.00460704	0.00542538	0.0100572	0.00463283	0.0126187	0.00716423	0.0085568	0	0	0.00293335	0	0.00625231	0	0	0.000942802	0.00813474	0.00610674	0.00367567	0.000814517	0.00255107	0.00526943	0.00178232	0.000939318	0.00764215
M00096	M00096: C5 isoprenoid biosynthesis, non-mevalonate pathway	0.0215138	0.023676	0.0143216	0.0343352	0.0127306	0.0176505	0.0198647	0.0174302	0.0216477	0.0203558	0.0202531	0.0205536	0.0139664	0.0235716	0.0153896	0.0190386	0.0178246	0.00653554	0.0173844	0.0162507	0.0188809	0.020834	0.0156039	0.0178112	0.0196541	0.0181114	0.00987492	0.0160568	0.0137701	0.0159166	0.01446	0.0189714	0.00817859	0.0167459	0.0193918	0.0140891	0.0170533	0.0161774	0.0122037	0.0151027	0.0213974	0.0199984	0.0227306	0.0167009	0.0158125	0.017254	0.0190898	0.0161546
M00097	M00097: beta-Carotene biosynthesis, GGAP => beta-carotene	6.05238e-08	0	0	0	0	0	0	0	0.000173728	0	0	1.28224e-05	8.00798e-05	0.000158635	2.31017e-07	0	0	0	0	3.25341e-05	0.00012374	2.31335e-05	0	5.34304e-05	0.000132341	0.000398942	0	9.30941e-07	0	0	2.34538e-05	4.28964e-10	0	1.89181e-05	0	0	0	0.000192459	3.17129e-06	0	0.000100001	0.000508953	0	1.99492e-07	1.73454e-08	0.000125247	0.000311473	4.93691e-06
M00098	M00098: Acylglycerol degradation	0.00106364	0.00528789	0.00119165	0.00604317	0.000729146	0.00170562	0.00333666	0.00130629	0.00242506	0.00251469	0.00133384	0.00331847	0.0028582	0.00272052	0.00174356	0.00285421	0.00028214	0.000158164	0.00235307	0.00304115	0.00310233	0.00211679	0.00393958	0.00192086	0.00195192	0.00283269	2.47874e-05	0.000567877	4.62009e-05	0.0021193	0.00154129	0.00340557	0.00087436	0.001658	0.00216457	0.0012219	0.00326174	0.000562791	0.00346138	0.0028275	0.00147442	0.00518494	0.00264287	0.000801454	0.00174973	0.00209724	0.00258539	0.0022008
M00099	M00099: Sphingosine biosynthesis	0	0	0	0	0	0	0	0	6.22354e-07	0	0	2.98947e-08	4.69707e-07	0	0	0	0	0	0	3.08928e-05	4.56094e-06	5.75525e-10	0	0	0	0	0	0	0	0	0	0	0	0	0	0	0	0	0	0	0	0	0	1.863e-09	2.96845e-08	0	0	4.1619e-05
M00101	M00101: Cholesterol biosynthesis, FPP => cholesterol	0	0	0	0	0	0	0	0	0	0	0	0	0	0	0	0	0	0	0	0	0	0	0	0	0	0	0	0	0	0	0	0	0	0	0	0	0	0	0	0	0	0	0	0	0	0	0	0
M00102	M00102: Ergocalciferol biosynthesis	0	0	0	0	0	0	0	0	0	0	0.00266277	0.000448531	0.00347899	0	0	0	0	0	0	0.00478274	2.79406e-05	0.000760176	0	0.000687466	0.000548989	0	0.000649626	0.000672444	0	0.000760844	0	0	0	0.000628092	0	0	0	0	0	0	0	0.00179014	8.41828e-05	0.00216118	0.00320219	0	0	0.00332351
M00104	M00104: Bile acid biosynthesis, cholesterol => cholate	0	0	0	0	0	0	0	0	0	0	0	0	0	0	0	0	0	0	0	0	0	0	0	0	0	0	0	0	0	0	0	0	0	0	0	0	0	0	0	0	0	0	0	0	0	0	0	0
M00105	M00105: Bile acid biosynthesis, cholesterol => chenodeoxycholate	0	0	0	0	0	0	0	0	0	0	0	0	0	0	0	0	0	0	0	0	0	0	0	0	0	0	0	0	0	0	0	0	0	0	0	0	0	0	0	0	0	0	0	0	0	0	0	0
M00109	M00109: C21-Steroid hormone biosynthesis, progesterone => cortisol/cortisone	0	0	0	0	0	0	0	0	0	0	0	0	0	0	0	0	0	0	0	0	0	0	0	0	0	0	0	0	0	0	0	0	0	0	0	0	0	0	0	0	0	0	0	0	0	0	0	0
M00110	M00110: C19/C18-Steroid hormone biosynthesis, pregnenolone => androstenedione => estrone	0	0	0	0	0	0	0	0	0	0	0	0	0	0	0	0	0	0	0	0	4.09908e-09	0	0	0	0	0	0	0	0	0	0	0	0	0	0	0	0	0	0	0	0	0	0	0	0	0	0	0
M00112	M00112: Tocopherol biosynthesis	0	0	0	0	0	0	0	0	0	0	0	0	0	0	0	0	0	0	0	0	0	0	0	0	0	0	0	0	0	0	0	0	0	0	0	0	0	0	0	0	0	0	0	0	0	0	0	0
M00113	M00113: Jasmonic acid biosynthesis	0	0	0	0	0	0	0	0	0	0	0	0	0	0	0	0	0	0	0	0	0	0	0	0	0	0	0	0	0	0	0	0	0	0	0	0	0	0	0	0	0	0	0	0	0	0	0	0
M00114	M00114: Ascorbate biosynthesis, plants, glucose-6P => ascorbate	0	0	0	0	0	0	0	0	0	0	0	0	0	0	0	0	0	0	0	0	0	0	0	0	0	0	0	0	0	0	0	0	0	0	0	0	0	0	0	0	0	0	0	0	0	0	0	0
M00115	M00115: NAD biosynthesis, aspartate => NAD	0.011261	0.00951387	0.00251033	0.00862688	0.00597029	0.00422018	0.00531989	0.00990356	0.00262908	0.0120659	0.00435773	0.00325382	0.0080113	0.00360467	0.0141331	0.0109912	0.00839262	0.0120638	0.00396324	0.00973645	0.00622785	0.00890274	0.000566417	0.0029707	0.0102602	0.00951938	0.00597889	0.00457046	0.000382853	0.00463012	0.00324234	0.00535513	0.00232945	0.00693633	0.00900854	0.00598023	0	0.00872674	0.0124628	0.0089901	0.00361323	0.00208551	0.010404	0.00718422	0.00690622	0.0134588	0.0100617	0.00570954
M00116	M00116: Menaquinone biosynthesis, chorismate => menaquinone	0	0	0.00078625	0	0	0	0	0	0	0	0	0	0	0	0	0	0	0	0	0	0	0	0	0	0	0	0	0	0	0	0	0	0	0	0	0	0	0	0	0	0	0	0	0	0	0	0	0
M00117	M00117: Ubiquinone biosynthesis, prokaryotes, chorismate => ubiquinone	0	0	0.000621552	0	0	0.00109726	0	0	6.51349e-05	0	0	0.000308347	0	0.000750985	0.0030919	0.000730101	0	0.00533626	0	0.000229358	0.000328787	0	0	0.000665413	0	0	0	0.00136071	0	4.96833e-05	0	0	0	0	0	0.000841352	0	0	0.00701043	0	0	0	0	1.94864e-05	5.31567e-10	0.00156891	0	0
M00118	M00118: Glutathione biosynthesis, glutamate => glutathione	2.91846e-05	0.00273362	0.00657023	0	0.000910827	0.00761783	0	0.00245254	0.000223914	0.00341542	0.000270944	0.0035442	0.0040522	0.00248948	0.0186866	0.00206913	0.0064411	0.0239252	0.0017888	0.000676867	0.000395063	0.000596066	2.25426e-06	0.00381523	0.000210286	0.00135117	0.00118467	0.00313033	0.000724559	0.00329073	0.000783541	0	0.00192865	0.00244556	4.4878e-06	0.00719861	0.0181764	0.00105491	0.0122817	0.00166164	0.00140214	0.000254832	0.00108777	0.003361	0.00721348	0.0017138	0.000655091	0.00297965
M00119	M00119: Pantothenate biosynthesis, valine/L-aspartate => pantothenate	0.0117596	0.0107402	0.0073001	0	0.011026	0.0115699	0.0172603	0.00933722	0.0129697	0.012987	0	0.00618082	0.0118004	0.00680367	0.00787637	0.0129208	0.0107791	0.00256309	0.0128289	0.00940223	0.0120773	0.0118642	0.0117981	0.00936933	0.0126081	0.0156463	0.0159196	0.00986709	0.0202235	0.0141543	0.0123014	0.0130231	0.00834127	0.0116232	0.00915077	0.00868423	0.022167	0.0167802	0.00625277	0.008358	0.0122944	0.0109402	0.0143322	0.00746998	0.0102899	0.0125404	0.0133394	0.0125251
M00120	M00120: Coenzyme A biosynthesis, pantothenate => CoA	0.0257498	0.0236464	0.0191705	0.0422311	0.0299585	0.0164086	0.0218711	0.022439	0.0247446	0.0214023	0.0186903	0.0222803	0.0186485	0.0245779	0.0161795	0.023391	0.0235921	0.0192702	0.0233587	0.0176039	0.0227252	0.0216063	0.0229168	0.0183075	0.0242323	0.0186116	0.0154328	0.0196753	0.0198914	0.0193933	0.0235324	0.0224598	0.0256049	0.0204172	0.0235755	0.0229306	0.0231416	0.0231938	0.0148307	0.0221001	0.0185569	0.0252917	0.0228392	0.018507	0.0188363	0.0208978	0.0204259	0.0156201
M00121	M00121: Heme biosynthesis, glutamate => protoheme/siroheme	0.0150076	0.0127403	0.00833943	0.0199157	0.00941041	0.0136698	0.0131903	0.0168308	0.0188337	0.0150852	0.0209138	0.0177031	0.0129835	0.021135	0.0105836	0.0101702	0.00451552	0.00300622	0.015004	0.0173904	0.0172195	0.01805	0.0150088	0.0173525	0.0141739	0.0124534	0.0118701	0.0160442	0.00937816	0.0141754	0.0142419	0.0159702	0.00764212	0.0131798	0.0169769	0.00873614	0.008288	0.0154649	0.014117	0.0133576	0.0197168	0.0180375	0.0183051	0.0144387	0.00754142	0.0126836	0.00952771	0.0107895
M00122	M00122: Cobalamin biosynthesis, cobinamide => cobalamin	0	0	0	0	0	0.00133607	0	0	0	0	0	0.00052952	0	0	0.000426355	0	0	0	0	0	0	0	0	1.51444e-05	0	0	0	0	0	0	0	0	0	0	0	0.000709616	0	0	0.00082192	0	0	0	0	3.4802e-05	6.52623e-10	0	0	0
M00123	M00123: Biotin biosynthesis, pimeloyl-CoA => biotin	0.0264587	0.0247308	0.0124725	0.0236162	0.0104949	0.0200565	0.0234904	0.0213622	0.0207894	0.024627	0.0218864	0.0200981	0.0173351	0.0194197	0.0204017	0.0190747	0.0211848	0.0193085	0.015712	0.0210311	0.0197243	0.0195287	0.0218301	0.0196603	0.0195549	0.0149497	0.0245341	0.020014	0.0187202	0.019901	0.0147174	0.0245879	0.0140148	0.0161298	0.0219678	0.0140591	0.0292803	0.0232921	0.0185587	0.0152292	0.0212441	0.01638	0.0231264	0.0165417	0.012812	0.016329	0.0142418	0.0133882
M00124	M00124: Pyridoxal biosynthesis, erythrose-4P => pyridoxal-5P	0	0	0.00561185	0	0.000337343	0.00804058	0	0	3.43304e-05	0.000581211	0	0.00209526	1.65198e-06	0.000776758	0.0118706	0.00107306	0	0.0098975	0.000277576	1.95399e-07	0.000218287	0	0	0.0029083	1.57166e-07	0	0	0.00238634	0	0.00186121	0.000134193	0	2.44003e-05	0.000557457	0.000127913	0.00440649	0.00771494	0	0.00612404	0	0	0	0.00108028	0.00220951	0.00356167	0.00162864	0.00236736	0.000443678
M00125	M00125: Riboflavin biosynthesis, GTP => riboflavin/FMN/FAD	0.0245788	0.0231119	0.0163292	0.025714	0.0108569	0.021425	0.0212504	0.0209095	0.0195945	0.0192223	0.0164657	0.0202307	0.017234	0.0237387	0.0264859	0.0228172	0.0232423	0.0330157	0.0167762	0.0201951	0.0197651	0.0197553	0.0147802	0.0221887	0.0211087	0.0172765	0.0174351	0.0189777	0.0210941	0.0208652	0.0149938	0.0202261	0.0130414	0.015885	0.0220028	0.0182635	0.0280622	0.0233372	0.0227928	0.019636	0.0221397	0.0185352	0.0224054	0.0200602	0.0180987	0.0221944	0.0196867	0.0196706
M00126	M00126: Tetrahydrofolate biosynthesis, GTP => THF	0.0125165	0.0129228	0.0116555	0.0165135	0.0177867	0.0147224	0.0227072	0.0170595	0.0190795	0.0110433	0.0168146	0.0208172	0.0131288	0.00646083	0.0142005	0.0187686	0.0135876	0.0012248	0.0203911	0.0122809	0.0169348	0.0180584	0.0166872	0.0137908	0.0216112	0.0194169	0.0189069	0.0169442	0.0117975	0.0166313	0.0141383	0.0189833	0.0151561	0.0170828	0.0173765	0.0153042	0.0160055	0.0180742	0.012131	0.015994	0.0216617	0.0210078	0.0125909	0.0137095	0.0140633	0.016052	0.0168857	0.0120655
M00127	M00127: Thiamine biosynthesis, AIR => thiamine-P/thiamine-2P	0.0180167	0.0142677	0.0124107	0.0120146	0.0137072	0.0154539	0.0134003	0.0143903	0.0185544	0.0200499	0.0184374	0.0184123	0.0126383	0.00503483	0.00891282	0.011639	0.00562868	0.012643	0.0163627	0.0137565	0.01776	0.0184945	0.00779498	0.0129614	0.0154796	0.0128957	0.0117949	0.0101448	0.00427673	0.0154715	0.012744	0.0119375	0.0132849	0.014478	0.0168906	0.0126836	0.0117511	0.0143133	0.0115525	0.0144305	0.0126273	0.0160573	0.0182147	0.0153769	0.011836	0.0130365	0.011291	0.0105665
M00128	M00128: Ubiquinone biosynthesis, eukaryotes, chorismate => ubiquinone	0	0	0.0002088	0	0	0.000418658	0	0	0	0	0.00175298	0.000777639	0	2.87436e-05	0	0.000157478	0	0	0	0.00126195	4.51145e-05	0	0	0.00115638	0	0	0	0.000190264	0	0.00017201	0	0	0	0	0	4.43147e-05	0	0	0	0	0	0	0	0.00103525	0.000687584	0.00025333	0	0
M00129	M00129: Ascorbate biosynthesis, animals, glucose-1P => ascorbate	0	0	0	0	0	0	0	0	0	0	0.00131014	1.22153e-06	0	0	0	0	0.000501418	0	0.000947551	0	0	2.46208e-05	0	0	0	9.36138e-06	0	0	4.87636e-05	0	2.83923e-06	0	0	0	2.91361e-06	0	0	0	0.000190388	0	0	0	0	0	6.55644e-10	0	0	0.00025002
M00130	M00130: Inositol phosphate metabolism, PI=> PIP2 => Ins(1,4,5)P3 => Ins(1,3,4,5)P4	0	0.00014284	4.26747e-06	0	4.07988e-06	0	0	0	2.01063e-06	0	1.12387e-05	5.25814e-06	2.20003e-09	0	1.55282e-06	1.06509e-05	3.04723e-05	0	8.2219e-07	3.09829e-05	6.75631e-07	2.62308e-10	9.81879e-05	4.27585e-06	1.13136e-05	5.55404e-06	0	4.74557e-06	0	7.64919e-06	1.49959e-06	0	3.17863e-07	5.52385e-05	0	1.42227e-06	0	0	3.16577e-07	1.94385e-06	3.01478e-05	0	3.88011e-06	8.78189e-10	7.00177e-13	8.31321e-05	2.64522e-05	2.8858e-05
M00131	M00131: Inositol phosphate metabolism, Ins(1,3,4,5)P4 => Ins(1,3,4)P3 => myo-inositol	0	0	0	0	0	0	0	0	0	0	0	0	0	0	0	0	0	0	0	0	0	0	0	0	0	0	0	0	0	0	0	0	0	0	0	0	0	0	0	0	0	0	0	0	0	0	0	0
M00133	M00133: Polyamine biosynthesis, arginine => agmatine => putrescine => spermidine	0	0.00133749	0.000526235	0	1.00414e-06	0.000101422	0	0.00022717	6.6802e-05	0	0.00189661	0.000210896	0.000301396	0.000699313	0.000267488	0.00109523	0	0	0	2.07814e-06	0.000206202	1.80882e-07	0	0.000426217	9.31661e-06	3.32684e-06	0.00054574	0.00151546	0	0.000563021	1.89076e-05	0.000145746	0	0.000745225	3.90445e-05	0.00023811	0	0.000448472	0.00163273	0	0	0.000123513	0.000107991	5.89561e-05	9.99111e-05	0.00213572	0.00206701	0.00022909
M00135	M00135: GABA biosynthesis, eukaryotes, putrescine => GABA	0.00124938	0	0.000440176	0	0.000194785	0.000134417	0.000879022	0	0.00101963	0.000352521	0.000160437	0.000613991	0.00110433	0.0015024	1.50644e-07	0.000804866	0.00156015	0	0.00147299	0.00127587	0.00189935	0.000963987	0.000172987	0.00315547	0.0014028	0	5.99459e-14	0.000425275	0.000590977	0.000646592	0.00105968	0.00118729	0	0.000980294	0.000592897	0.000736169	2.84099e-07	0.00210551	0.000929558	0.00103664	0.00247611	0.000986181	0.00224209	0.000884116	0.000413471	0.00107595	0.000348231	0.000636479
M00136	M00136: GABA biosynthesis, prokaryotes, putrescine => GABA	0	0	0	0	0	0	0	0	0	0	0	0	0	0	9.30652e-05	0	0	0	0	0	4.19534e-05	0	0	0	0	0	0.000432264	0.000328135	0	0	0	0	0	0	0	0	0	0	0	0	0	0	0	0	0	0.000421113	0.000848712	0
M00141	M00141: C1-unit interconversion, eukaryotes	0.000690856	0.000560646	0.000482667	0.00202925	0.00277049	0.000693859	0.00176567	0.000661521	0.000642862	0.00158717	0.00377903	0.00164857	0.00682847	0.00169096	0.000245251	0.00102073	0.000275284	5.26313e-08	0.000912004	0.00868192	0.00137773	0.00210811	0.000472271	0.00392771	0.00175815	0.000391534	0.00134716	0.00218371	0.00126626	0.00200781	0.00160497	0.000977098	0.000767621	0.00180369	0.000747518	0.000745245	5.22432e-08	0.000340106	9.45618e-05	0.00206106	0.00236583	0.00372943	0.00118445	0.00451092	0.00137603	0.000613191	0.000792417	0.00538789
M00142	M00142: Complex I (NADH dehydrogenase), NADH dehydrogenase I	0	0	0	0	0.000527857	0	0	0.000474124	0.000103627	0	0.00326534	0.000923652	0.00570834	0	0	0	0	0	0	0.00789249	0.000179373	0.00056731	0	0.00514701	0.00225297	0.0031638	0.00528229	0.00117467	0.000735212	0.000973865	0.000575657	0.000336441	0	0.00257678	0	0.000292594	0	0	0	0.00100738	0	0.00295318	0	0.00977374	0.0187757	0	0	0.0112799
M00143	M00143: Complex I (NADH dehydrogenase), NADH dehydrogenase (ubiquinone) Fe-S protein/flavoprotein	0	0	0	0	0	0	0	0	0	0	0	0	0	0	0	0	0	0	0	0	0	0	0	0	0	0	0	0	0	0	0	0	0	0	0	0	0	0	0	0	0	0	0	0	0	0	0	0
M00144	M00144: Complex I (NADH dehydrogenase), NADH dehydrogenase I	0.0194468	0.0152694	0.00738174	0	0.00534095	0.0118154	0.0129174	0.0161996	0.00588365	0.0158698	0.0120997	0.00568881	0.00877367	0.0236473	0.0114713	0.0113232	0.0157421	0	0.00754954	0.0104821	0.0140597	0.0080832	0.0108004	0.0156908	0.00716587	0.0100312	0.0094577	0.0134859	0.0133866	0.00961767	0.0063946	0.0157161	0.0051559	0.00763359	0.0137545	0.00749995	0.0133196	0.00960379	0.0123042	0.0071234	0.0121381	0	0.020912	0.0122324	0.0140507	0.0127696	0.0117423	0.0137742
M00145	M00145: Complex I (NADH dehydrogenase), NADH dehydrogenase I/diaphorase subunit of the bidirectional hydrogenase	0	0	0	0	0	0	0	0	0	0	0	0	0	0	0	0	0	0	0	0	0	0	0	0	0	0	0	0	0	0	0	0	0	0	0	0	0	0	0	0	0	0	0	0	0	0	0	0
M00146	M00146: Complex I (NADH dehydrogenase), NADH dehydrogenase (ubiquinone) 1 alpha subcomplex	0	0	0	0	0	0	0	0	0	0	0	0	0	0	0	0	0	0	0	0	0	0	0	0	0	0	0	0	0	0	0	0	0	0	0	0	0	0	0	0	0	0	0	0	0	0	0	0
M00147	M00147: Complex I (NADH dehydrogenase), NADH dehydrogenase (ubiquinone) 1 beta subcomplex	0	0	0	0	0	0	0	0	0	0	0	0	0	0	0	0	0	0	0	0	0	0	0	0	0	0	0	0	0	0	0	0	0	0	0	0	0	0	0	0	0	0	0	0	0	0	0	0
M00148	M00148: Complex II (succinate dehydrogenase / fumarate reductase), succinate dehydrogenase (ubiquinone)	0	0	0	0	0	0	0	0	0	0.000100167	0.00286308	0.000620474	0.00361472	0	0	0	0	0	0	0.00474482	5.25481e-05	0.00171735	0	0.000750606	0.000683705	0	0	0	0	0.000421783	0	0	0	0.000720098	0	0	0	0	0	0	0	0	0.000315296	0.000925384	0.00109908	0	0	0.00329426
M00149	M00149: Complex II (succinate dehydrogenase / fumarate reductase), succinate dehydrogenase	0	0	0.0183477	0	0	0.0250764	0	0	0.0295092	0.0203926	0.0209635	0.0286886	0.0167158	0.0252523	0.0277386	0.0219659	0.0139018	0.030535	0	0.0187774	0.0248174	0.025407	0.017596	0.022728	0.0269332	0.024876	0.019602	0.0224568	0.0259675	0.0233088	0.0194156	0.0234099	0.0176657	0.0194509	0	0.0225853	0.0376521	0	0.0228072	0	0	0	0	0.0216368	0.0230109	0.0236417	0.0255677	0
M00150	M00150: Complex II (succinate dehydrogenase / fumarate reductase), fumarate reductase	0	0	0.00141004	0	0	0	0	0	0	0	0	0	0	0	0	0.00183219	0	0	0	0	0.000230194	0	0	0	0	0	0	0.00156978	0	0	0	0	0	0.00254547	0	0	0	0	0.00156413	0	0	0	0	0	0	0.00154445	0	0
M00151	M00151: Complex III (Cytochrome bc1 complex)	0	0.0183336	0.00768264	0.0334358	0.0145648	0.012245	0.0138425	0.0152183	0.0265886	0.0168455	0.0208171	0.0232493	0.0155696	0.0189279	0.0165667	0.0110584	0.00399143	0.0185754	0.0199387	0.0159578	0.0171669	0.020509	0.0118652	0.0167465	0.0203381	0.0167824	0.00976416	0.0143266	0	0.0134277	0.0166092	0.0108183	0.00938241	0.0165249	0.0196319	0.0112597	0.0175708	0.00903587	0.0105688	0.0214171	0.0135125	0.0258414	0.0169384	0.0195678	0.0215458	0.0115249	0.0134434	0.0124073
M00152	M00152: Complex III (Cytochrome bc1 complex)	0	0	0	0	0	0	0	0	0	0	0	0	0	0	0	0	0	0	0	0	0	0	0	0	0	0	0	0	0	0	0	0	0	0	0	0	0	0	0	0	0	0	0	0	0	0	0	0
M00154	M00154: Complex IV (Cytochrome c oxidase), cytochrome c oxidase	0	0	0	0	0	0	0	0	0	0	0	0	0	0	0	0	0	0	0	0	0	0	0	0	0	0	0	0	0	0	0	0	0	0	0	0	0	0	0	0	0	0	0	0	0	0	0	0
M00155	M00155: Complex IV (Cytochrome c oxidase), cytochrome o ubiquinol oxidase/cytochrome c oxidase/quinol oxidase polypeptide	0	0	0	0	0	0	0	0	0	0	0	0	0	0	0	0	0	0	0	0	0	0	0	0	0	0	0	0	0	0	0	0	0	0	0	0	0	0	0	0	0	0	0	0	0	0	0	0
M00156	M00156: Complex IV (Cytochrome c oxidase), cytochrome c oxidase, cbb3-type	0	0	0.00553216	0	0	0.00710148	0	0	4.22233e-05	0	0	0.00277823	0	0	0.0167212	0	0	0.0166244	0	0	0	0	0	0.00169791	0	0	0	0	0	0.00181807	0	0	0	0	0	0.00426649	0.0124288	0	0.0100106	0	0	0	0	0.0032088	0.00375816	0	0	0.000611405
M00157	M00157: F-type ATPase, bacteria	0.0240025	0.0226953	0.0254971	0.0281005	0.0200459	0.0234309	0.0237251	0.0305437	0.0259372	0.0180888	0.0233645	0.0246079	0.0178634	0.029114	0.0235189	0.0213677	0.030521	0.033595	0.0214278	0.018599	0.021581	0.02092	0.024229	0.0194184	0.0247223	0.0278839	0.0222365	0.0211182	0.0217202	0.0220428	0.0208715	0.0256495	0.0213545	0.0200602	0.0236968	0.0214011	0.0314607	0.0227388	0.02435	0.0271869	0.021935	0.0228701	0.0254761	0.0197253	0.0248613	0.0207456	0.0236177	0.0197815
M00158	M00158: F-type ATPase, eukaryotes	0	0	0	0	0	0	0	0	0	0	0	0	0	0	0	0	0	0	0	0	0	0	0	0	0	0	0	0	0	0	0	0	0	0	0	0	0	0	0	0	0	0	0	0	0	0	0	0
M00159	M00159: V-type ATPase, prokaryotes	0	0	0.00144975	0	0.00692598	0	0	0	0	0	0	0.00020181	0.00123669	0	0.00057046	0	0.00159759	0	0	0	0.00107473	0	0	0.00228923	0	0.00626562	0	0.00273197	0	0	0.00448884	0	0	0.00320321	0.000932035	0.00311131	0	0.00227648	0	0	0	0	0	0.00090106	0.00204755	0	0	0.000259304
M00160	M00160: V-type ATPase, eukaryotes	0	0	0	0	0	0	0	0	0	0	2.87924e-12	0.000340527	0.00325837	0	0	0	0	0	0	0.00523915	0	0	0	0.000179336	0	0	0	0	0	0	0	0	0	0	0	0	0	0	0	0	0	0	0	0.000112537	0	0	0	0.0021748
M00161	M00161: Photosystem II	0	0	0	0	0	0	0	0	0	0	0	0	0	0	0	0	0	0	0	0	0	0	0	0	0	0	0	0	0	0	0	0	0	0	0	0	0	0	0	0	0	0	0	0	0	0	0	0
M00162	M00162: Cytochrome b6f complex	0	0	0	0	0	0	0	0	0	0	0	0	0	0	0	0	0	0	0	0	0	0	0	0	0	0	0	0	0	0	0	0	0	0	0	0	0	0	0	0	0	0	0	0	0	0	0	0
M00163	M00163: Photosystem I	0	0	0	0	0	0	0	0	0	0	0	0	0	0	0	0	0	0	0	0	0	0	0	0	0	0	0	0	0	0	0	0	0	0	0	0	0	0	0	0	0	0	0	0	0	0	0	0
M00164	M00164: ATP synthase	0.0240025	0.0226953	0.0254971	0.0281005	0.0200459	0.0234309	0.0237251	0.0305437	0.0259372	0.0180888	0.0233645	0.0246079	0.0178634	0.029114	0.0235189	0.0213677	0.030521	0.033595	0.0214278	0.018599	0.021581	0.02092	0.024229	0.0194184	0.0247223	0.0278839	0.0222365	0.0211182	0.0217202	0.0220428	0.0208715	0.0256495	0.0213545	0.0200602	0.0236968	0.0214011	0.0314607	0.0227388	0.02435	0.0271869	0.021935	0.0228701	0.0254761	0.0197253	0.0248613	0.0207456	0.0236177	0.0197815
M00165	M00165: Reductive pentose phosphate cycle (Calvin cycle)	0	0	0	0	0	0	0	0	0	0	0	2.59807e-06	0	0	0	0	0	0	0	0	0	0	0	0	0	0	0	0	0	0	0	0	0	0	0	0	0	0	0	0	0	0	0	0	0	0	0	0
M00166	M00166: Reductive pentose phosphate cycle, RuBP + CO2 => glyceraldehyde-3P	0	0	0.000205663	0	0	0	0	0	0	0	0	3.79402e-07	0	0	0	0	0	0	6.94447e-05	0	0	0	0	0	0	0	0	0	0	0	0	0	0	0	0	0	0	0	0.000227613	0	0	0	0	0	0	0	0	0
M00167	M00167: Reductive pentose phosphate cycle, glyceraldehyde-3P => RuBP	0	0	0	0	0.000638641	0	0	0	0	0	0	0.000596587	0	0.000887724	0.00114592	0.00643978	0	0	0	0	0.000438174	0.000276627	0	0	0	0	0.00154021	0.00542461	0	7.35043e-05	0	0	0	0	0	0	0	0	0	0	0	0	0.000725099	0	0	0	0.00786467	0
M00168	M00168: CAM (Crassulacean acid metabolism), dark	0.00102103	0.00118646	0.0112301	0.000984442	0.000681206	0.000926852	0.000996256	0.00476967	0.000492669	0	0.000497362	0.00186061	0.00158923	0.00221232	0.00147873	0	0.00104652	0	0.00089827	0.00101503	0.000732823	0.00146545	0.00758453	0.000744716	0.00157379	3.13895e-05	0.000662481	0.00336938	0.00162727	0.000796013	0.00086571	0.000325837	0.00227914	0.00364122	0.00197635	0.0014633	9.33674e-05	0.00317255	0.0098942	0.00114868	0.0012806	0.000300529	0.000821402	0.00119116	0.00147416	0.00277028	0.00233788	0.00462871
M00170	M00170: C4-dicarboxylic acid cycle, phosphoenolpyruvate carboxykinase type	0.00069495	0.00108083	0.00354928	0	0.000615702	0.00104719	0.000287144	0.0015071	0.000315191	0	0.000701261	0.000116969	0.00204423	0.00130745	0.000557582	0	0.00122895	0	0.000855751	0.00154607	0.000682446	3.83629e-05	0.00452079	0.000567136	0.00139418	0.00102188	0.00104657	0.00332658	0.00147346	0.000626412	0.000926473	0.00049907	0.00179052	0.00273855	0.00118744	0.00106023	0.000320114	0.0016944	0.00688572	0.00120131	0.00106743	0.00110967	0.000883684	0.00134607	0.000964933	0.00207799	0.00179138	0.00499111
M00171	M00171: C4-dicarboxylic acid cycle, NAD+ -malic enzyme type	0	0	0.000137064	0	0.000947994	7.34827e-05	0	8.88656e-05	0	0	0.000403958	7.51269e-05	0.00155481	0.000279723	0	0	0	0	5.274e-08	0.000712466	9.90014e-05	3.2491e-05	0	0.000564048	4.67636e-05	0	0	0	0	0.000223374	0.000287071	0	0.000323469	0.000767129	0	0.000441077	0	0.000109838	0	0.0011824	0.000331366	0.000214365	4.48946e-08	1.33426e-06	9.91867e-05	8.7348e-05	0.000148035	4.79246e-07
M00172	M00172: C4-dicarboxylic acid cycle, NADP+ -malic enzyme type	0	0	0	0	0	0	0	0	0	0	0	0	0	0	0	0	0	0	0	0	0	0	0	0	0	0	0	0	0	0	0	0	0	0	0	0	0	0	0	0	0	0	0	0	0	0	0	0
M00173	M00173: Reductive citric acid cycle (Arnon-Buchanan cycle)	0	0	0	0	0	0	0	0	0	0	0	9.90708e-05	0	0.000349886	0.000337701	0	0	0	0	0	0.000227924	0	0	0	0	1.18997e-06	0	0	0	3.73739e-05	0.000267905	0	0	0.000251376	0	0.000297778	0	0	0	0	0	0	0	0.00182629	0.0025474	0.00202052	0.00127734	0
M00174	M00174: Methane oxidation, methylotroph, methane => CO2	6.90456e-08	0	4.34816e-05	0	8.17517e-07	2.87905e-05	0	0	6.82017e-05	3.35751e-15	0	0.000123681	3.8909e-06	0.00029378	0.000133567	0	0	0	0.000203618	7.99354e-07	2.76258e-05	7.74023e-09	0.00019753	4.83815e-09	6.73908e-09	0	0	1.33678e-05	0	1.34537e-07	1.67606e-09	0.000113469	0	3.51719e-07	6.67736e-07	4.61186e-12	9.15717e-05	4.05055e-07	3.25865e-06	1.96315e-06	0.000242571	0	4.08601e-13	1.83217e-12	9.72505e-10	0.000454445	0.000376455	6.55062e-08
M00175	M00175: Nitrogen fixation, N2 => ammonia	0	0	0.000730916	0	0.00162246	1.22873e-09	0	0	2.01536e-06	0	1.26796e-08	1.80848e-06	4.18335e-07	0	0	0	0	0	0.000915463	0	0.000248191	2.49925e-12	0	0.000386555	0	0	0	0	0	0	0.001582	0.00013203	0.00124955	0.000130713	0.000569979	0.000770581	0	8.2877e-05	0.000127164	0	0	0	0	0	0.000480111	0.000127936	7.52821e-05	0
M00176	M00176: Sulfur reduction, sulfate => H2S	0	0	0	0	0	0.000115888	0	0	0	0	0	9.15446e-07	0	0	0	0.000146733	0	0	0	0	0	8.39541e-05	0	0	0.000452696	0	0	0	0	0	0	0	0	4.03929e-06	0	0.000122535	0	0	0	0.000968631	0.0002546	0	0	0	9.31688e-05	0	0	0
M00177	M00177: Ribosome, eukaryotes	0	0	0	0	0	0	0	0	0	0	0	0.000769418	0.00466231	0	0	0	0	0	0	0.00681575	0	0.00138985	0	0	0	0	0	0	0	0	0	0	0	0	0	0	0	0	0	0	0	0	0	0.00241097	0.00164553	0	0	0.00366248
M00178	M00178: Ribosome, bacteria	0.0291056	0.026755	0.0313581	0	0.0403855	0.0284665	0.0270391	0.0278467	0.0328658	0.0246868	0.0218007	0.0320851	0.0241074	0.0273453	0.0300725	0.0284198	0.0281265	0.0379052	0.0318299	0.0211322	0.0297874	0.0301737	0.0218892	0.0256003	0.0317738	0.0286586	0.0237753	0.0227621	0.0246031	0.0272669	0.0314046	0.0271323	0.0397613	0.0311453	0.0302485	0.0356615	0.033781	0.0279723	0.0281635	0.033154	0.0292743	0.0346352	0.0297408	0.0255075	0.0274517	0.0317569	0.0315559	0.0244316
M00179	M00179: Ribosome, archaea	0	0	0	0	0	0	0	0	0	0	0	0	0	0	0	0	0	0	0	0	0	0	0	0	0	0	0	0	0	0	0	0	0	0	0	0	0	0	0	0	0	0	0	0	0	0	0	0
M00180	M00180: RNA polymerase II, eukaryotes	0	0	0	0	0	0	0	0	0	0	0	0.000694609	0.00487142	0	0	0	0	0	0	0	0	0.000757581	0	0.00213702	0	0	0	0	0	0	0	0	0	0	0	0	0	0	0	0	0	0	0	0	0	0	0	0.00368359
M00181	M00181: RNA polymerase III, eukaryotes	0	0	0	0	0	0	0	0	0	0	0	0.000632394	0.00319928	0	0	0	0	0	0	0.00638987	2.22503e-05	0.000940651	0	0	0.000379509	0	0	0	0	0.000629545	0	0	0	0	0	0	0	0	0	0	0	0.0021935	0	0.00175565	0.00181838	0	0	0.00379453
M00182	M00182: RNA polymerase I, eukaryotes	0	0	0	0	0	0	0	0	0	0	0	0	0	0	0	0	0	0	0	0	0	0	0	0	0	0	0	0	0	0	0	0	0	0	0	0	0	0	0	0	0	0	0	0	0	0	0	0
M00183	M00183: RNA polymerase, bacteria	0.0377345	0.0299639	0.0288974	0.0374444	0.0369905	0.0290658	0.0288172	0.019034	0.0301955	0.0311236	0.0227619	0.0278669	0.0182271	0.0244749	0.0271874	0.0322327	0.0387486	0.0218515	0.0304665	0.0158534	0.0292161	0.0245781	0.0265723	0.0271042	0.0326301	0.0278239	0.0231567	0.0196202	0.0251478	0.0258369	0.0303053	0.0303675	0.0359275	0.0288384	0.0314168	0.0307381	0.0413459	0.0328995	0.0230886	0.0255903	0.0299238	0.0345387	0.0276942	0.0249633	0.0283442	0.0313528	0.036143	0.024557
M00184	M00184: RNA polymerase, archaea	0	0	0	0	0	0	0	0	0	0	0	0	0	0	0	0	0	0	0	0	0	0	0	0	0	0	0	0	0	0	0	0	0	0	0	0	0	0	0	0	0	0	0	0	0	0	0	0
M00185	M00185: Sulfate transport system	0	0	0.000445291	0	0.00047791	0.000145702	0	0.000462417	0.000323026	0	8.55811e-05	0.000131862	0.000952207	0.000739697	0.0115315	0	0	0	0.00129106	0.000536583	0.000573098	0.000736587	0.00084704	0.000577182	0.000433203	0	0.000923076	0.0013116	0	7.01752e-05	0.000371519	0.000203508	0	0.00204854	0.00038778	0	0	0	0.00750879	0.000261864	1.44504e-05	0.000911953	1.05361e-06	0.000500164	6.49444e-07	0.000618663	0.000125525	0.000678374
M00189	M00189: Molybdate transport system	0.00881753	0.00705123	0.00697827	0.0167474	0.00740211	0.0109127	0.0125842	0.0118481	0.0103601	0.0091619	0.0105425	0.00960373	0.00538929	0.0117718	0.0139407	0.00779914	0.00643449	0.0117471	0.0101146	0.00966119	0.0109364	0.00704184	0.0200941	0.0149054	0.00949604	0.0106277	0.015252	0.0110723	0.0162874	0.012514	0.00773862	0.011486	0.00752317	0.00716448	0.0105591	0.00908255	0.0142429	0.0122846	0.00922941	0.0113008	0.0125035	0.00839919	0.014476	0.00824542	0.00851418	0.00632733	0.00708545	0.00675462
M00193	M00193: Putative spermidine/putrescine transport system	0.000288827	0.00058707	0.000434728	0	5.15859e-05	0.000224236	0.000231533	0.000339727	0.000288498	0	0.000146245	0.000245516	0.000309348	0.00084171	0.00545751	0.000148653	0	0	0.00100605	0	0.000272056	0.000398452	0.000357739	0.000161312	2.16384e-05	0.000605194	0.00152068	0.000880195	0	0.000280228	0.0018601	0.000228981	5.4536e-05	0.000977337	0.000105907	0.000350346	0	0.000179664	0.00121067	0.000388856	0.000804781	0.000976014	0.000953825	0.000255898	0.000441644	0.00101092	0.00060143	4.79387e-05
M00194	M00194: Maltose/maltodextrin transport system	0.00743532	0.00961828	0.0130617	0.00354754	0.0226676	0.00698072	0.016497	0.0121066	0.00394604	0.0109233	0.0047295	0.002252	0.00748437	0.00800038	0.00320401	0.00281595	0	0	0.0121098	0.00262747	0.0110652	0.00470414	0.0137699	0.0079233	0.00228651	0.00570236	0.00815826	0.0105381	0	0.007208	0.0141282	0.00642079	0.0216653	0.0076526	0.00886016	0.012433	0	0.0115208	0.00270658	0.00875838	0.00684755	0.00283188	0.00614368	0.00497988	0.00702715	0.00274399	0.00195877	0.00800248
M00197	M00197: Putative sugar transport system	0.00537657	0.00796225	0.013178	0.00169677	0.0245613	0.00644995	0.0148639	0.0107484	0.00348066	0.00896753	0.00337938	0.00256347	0.0070596	0.00497223	0.00362453	0.00330856	9.46139e-05	0.0053093	0.0120222	0.00176655	0.00958615	0.0043743	0.0141704	0.0054747	0.00269621	0.00576348	0.0082351	0.00768163	0.0191019	0.00669003	0.0147483	0.00602145	0.0223216	0.00819812	0.00687245	0.0135918	0.00184313	0.0108151	0.00229211	0.00826771	0.00532162	0.00299172	0.00420975	0.00438559	0.00666686	0.00310531	0.00258673	0.00689629
M00198	M00198: sn-Glycerol 3-phosphate transport system	0.00428105	0.000745578	0.00403302	0.000425742	0.0031831	0.00529563	0.00295785	0.00624112	0.00239202	0.00241618	0.00158253	0.00294735	0.00491645	0.00347683	0.00132016	0.0110177	0.0142727	0	0.00656906	0.00155706	0.0016385	0.00610504	0.0028012	0.00153775	0.00511405	0.011896	0.00193341	0.00253622	0.00586587	0.00391431	0.00304329	0.00150942	0.001391	0.00859047	0.00686458	0.00602504	0	0.00264322	0.000631236	0.00332505	0.00407031	0.0014233	0.00210408	0.00442785	0.00579984	0.0121966	0.00938726	0.002303
M00199	M00199: Lactose/L-arabinose transport system	0.000359376	0	4.5669e-05	0	0.00044189	2.63628e-06	0	1.6045e-05	4.20352e-05	0	0	1.72959e-05	2.36099e-05	0.000104818	3.68685e-07	0	0	0	4.90965e-05	9.0856e-06	3.35368e-05	5.75794e-08	7.32171e-06	0	6.63827e-05	0.000173062	1.31972e-06	3.16975e-06	0	8.56674e-06	5.20738e-05	0.00284688	0	0.0001302	2.71866e-05	0.000113125	0	0.000230547	0	0	1.94735e-06	0	0	1.09952e-11	8.72486e-07	0	0	7.65738e-06
M00200	M00200: Sorbitol/mannitol transport system	0	0	9.65882e-09	0	0	0	0	0	2.22201e-06	0	0	3.0553e-05	4.35003e-10	0	0	0	0	0	7.82326e-05	0	8.71443e-05	0	0	0	0	0	0	1.85066e-07	0	1.37109e-07	2.69608e-05	5.82383e-05	0	3.12589e-05	0	0	0	0	0	0	0	0	1.88038e-05	8.16008e-07	0	0.000515323	0	1.55395e-16
M00201	M00201: alpha-Glucoside transport system	6.16685e-06	1.97941e-05	4.43315e-06	0	3.75106e-05	1.89682e-05	0	0.000121263	5.06146e-05	0	1.63381e-06	7.41552e-06	4.68198e-08	1.95291e-05	3.2154e-06	0	0	0	0.000154726	8.36684e-07	0.000139492	6.78884e-07	0	4.03187e-06	1.41971e-07	5.38668e-06	0	1.34569e-06	0	2.2949e-06	4.88776e-05	1.89323e-05	0	4.88044e-05	2.39719e-05	9.65267e-06	0	2.22094e-06	6.19223e-07	0	0.00011769	0	6.27527e-05	1.06295e-08	2.63562e-08	8.31089e-06	0	1.26293e-07
M00202	M00202: Oligogalacturonide transport system	0	0.000545891	0	0	0	0	0	0	0	0	0	2.59432e-07	0	0	0	0	0	0	0	0	0	0	0	0	0	0	0	0.000522505	0	0	0	0	0	0	0	0	0	0	0	0	0	0	7.21031e-05	0	2.42233e-06	0	0	1.28373e-05
M00203	M00203: Glucose/arabinose transport system	0	0	0	0	0	0	0	0	0	0	0	0	0	0	0	0	0	0	0	0	0	0	0	0	0	0	0	0	0	0	0	0	0	0	0	0	0	0	0	0	0	0	0	0	0	0	0	0
M00204	M00204: Trehalose/maltose transport system	0	0	0	0	0	3.38345e-05	0	0	0	0	0	0	0	0	0	0	0	0	0	0	0	0	0	0	0	3.45717e-06	2.30141e-07	5.71423e-09	0	0	7.24785e-05	0	0	0	0	0	0	0	0	0	0	0	0	4.27416e-09	3.69548e-07	0	0	0
M00206	M00206: Cellobiose transport system	0.000273557	0.000223464	6.55342e-05	0	0.000135163	7.44296e-05	0.000328789	0.000945998	0.000294767	0.00021248	0.000115009	3.08393e-05	6.31261e-05	0.000907221	0	0	0	0	0.000314394	1.82752e-05	0.000812686	0.000122593	0.000203824	0.00101549	2.69018e-06	0.000354922	0.000152351	0.000257471	9.30246e-05	0.000122742	7.76025e-05	0.000485909	0	4.22286e-05	0.00040235	4.96255e-05	0	0.000103833	1.6207e-06	0	0.000685656	7.56655e-05	0.000687362	2.16994e-05	3.48799e-05	9.56845e-05	0	0
M00207	M00207: Multiple sugar transport system	0.0191917	0.0159309	0.011288	0.0231296	0.0179009	0.00987018	0.0128463	0.0176804	0.0114505	0.0148743	0.013818	0.0083925	0.00938684	0.0175552	0.00448434	0.00672878	0.00637246	0.00689907	0.0142549	0.00928557	0.0156209	0.0111461	0.0139684	0.0139852	0.00934019	0.0130172	0.0150402	0.0159111	0.00801869	0.0120309	0.0123886	0.0149781	0.0137178	0.0102769	0.0165805	0.00879412	0.00527986	0.0118019	0.00412746	0.0116082	0.0162003	0.0113851	0.0158114	0.0105151	0.0117485	0.00795935	0.0101718	0.00972513
M00219	M00219: AI-2 transport system	0	0	0	0	0	0	0	0	0	0	0	0	0	0	0	0	0	0	0	0	2.15223e-05	0	0	0	0	0	0.000179211	0.000490863	0	0	0	0	0	0	0	0	0	0	0	0	0	0	0	0	0	0.000433749	0	0
M00220	M00220: Rhamnose transport system	0	0	0	0	0	0	0	0	0	0	0	0	0	0	0	0	0	0	0	0	0	0	0	0	0	0	0	0.00101131	0	0	0	0	0	0	0	0	0	0	0	0	0	0	0	0	0	0	0	0
M00222	M00222: Phosphate transport system	0.0307551	0.0207112	0.0144336	0.0278374	0.0116917	0.0144244	0.0263178	0.0260153	0.0203053	0.0184462	0.0223007	0.0239632	0.017201	0.0233072	0.023599	0.0234558	0.0180407	0.000777495	0.0199877	0.0198844	0.0206177	0.0215497	0.0212911	0.0165299	0.0267837	0.0262927	0.0238683	0.022839	0.0153066	0.018533	0.0176359	0.0195718	0.0108091	0.0184008	0.025304	0.0132873	0.00653184	0.0235524	0.00540942	0.0211451	0.0259031	0.0318067	0.0236892	0.0192859	0.0187683	0.0243475	0.0228365	0.0164735
M00225	M00225: Lysine/arginine/ornithine transport system	0	0	0.00029437	0	0	0.000192928	0	0	1.93824e-05	0	0	2.62065e-05	0	0	0.00165179	0	0	0	8.89884e-07	0	0	0	0	0	0	0	0.00101447	0.00153947	0	0	0	0	0	0	7.73744e-05	4.42489e-05	0	0	0.000685669	0	0	0	0	2.28009e-08	0.000137486	0.00065467	0	0
M00226	M00226: Histidine transport system	0	0	6.55962e-05	0	0	3.45867e-05	0	0	0	0	0	7.36821e-06	0	0	0.00165179	0	0	0	8.89884e-07	0	0	0	0	0	0	0	0.00101447	0.00147239	0	0	0	0	0	0	0	8.13401e-05	0	0	0.000685669	0	0	0	0	2.40009e-08	4.19614e-07	0.00065467	2.92958e-05	0
M00229	M00229: Arginine transport system	0	0	0.000921246	0	0	0.00100022	0	0	0	0	0	0.000349489	0	0	0.00179709	0	0	0	0	0	2.09001e-09	0	0	8.27361e-05	0	0	6.0871e-05	0.000407733	0	8.2331e-05	0	0	0	0.00052656	0	0.000665533	0	0	0.00307312	0	0	0	0	0	0.00013254	0	0.000127058	0.000376892
M00230	M00230: Glutamate/aspartate transport system	0	0	6.1784e-06	0	0	0	0	0	0	0	0	0	6.32165e-07	0	0	0	0	0	7.85896e-05	0	1.09826e-05	0	0	0	0	0	0.000974619	0.00102551	0	0	0	0	2.81215e-07	0	4.04486e-06	0	0	0.000422739	0	0	0	0	0	8.31717e-06	0	0.000249489	0.0010257	0
M00231	M00231: Octopine/nopaline transport system	0	0	0.000233417	0	0	0.000479171	0	0	0	0	0	0.000167014	0	0	0.000894641	0	0	3.9027e-06	0	0	1.64792e-06	0	0	7.45512e-06	0	0	0	0	0	5.2913e-06	0	0	2.07592e-07	1.78395e-08	0	0.000310635	0	0	0.000286846	0	0	0	0	1.31784e-06	4.91383e-06	0	0	0
M00232	M00232: General L-amino acid transport system	0	0	4.53888e-05	0	0	0.000138362	0	0	8.92954e-05	0	1.88396e-05	0.000122849	0.000252996	0.000419916	0	0	0	7.91264e-05	0.000286891	9.17986e-05	0.000169815	3.82074e-05	9.28956e-05	3.06199e-05	0	0	0	0	0	0	0	0	0	0	9.23131e-05	0	0	2.44799e-05	0.000114723	0	0.000142008	0	0	3.2236e-05	0	9.40115e-05	0	0
M00233	M00233: Glutamate transport system	0	0	0	0	0	0	0	0	0	0	0	0.000273835	0	0.000450169	0	0	0	0	0.000364529	0	0	2.85672e-05	0.0025583	0	0	0	0	0	0	9.70321e-05	0	0	0	0.000464388	0	0	0	0	0	0	0	0	0	0.000151174	1.25574e-08	0.00111961	0	0
M00235	M00235: Arginine/ornithine transport system	0	0	0.000117151	0	0	1.61572e-05	0	0	0	0	0	2.79184e-05	0	0	0.000446032	0	0	0	0	0	0	0	0	1.10209e-06	0	0	0	0	0	8.24628e-07	0	0	0	0	0	7.28404e-05	3.82979e-05	0	0.00010099	0	0	0	0	0	1.10139e-05	0	0	0
M00237	M00237: Branched-chain amino acid transport system	0.0015072	0.000945718	0.00530959	0.000706997	0.001196	0.000342201	4.66874e-05	0.000441817	0.00138262	4.1701e-06	0.000829558	0.000482189	0.00137693	0.00221444	0.00054418	0.000643249	0.000217247	0	0.00097623	0.00136167	0.00133268	0.000428196	0.00181936	0.000525558	0.000365193	0.00028871	0.00120243	0.00284243	6.60345e-05	0.000163795	0.000374632	0.000345392	0	0.00138562	0.00177587	0.000727471	0	0.00154538	0.00177245	0	0.00124413	0.000751211	0.000844315	0.000962995	0.000326964	0.000712517	0.00147967	0.00182585
M00239	M00239: Peptides/nickel transport system	0.0139533	0.0173842	0.0149478	0.0210772	0.0220418	0.0119154	0.0179771	0.0183811	0.0177133	0.0134648	0.012781	0.0119652	0.0124646	0.0175334	0.0118018	0.012325	0.0110889	0.0131632	0.0178859	0.00995933	0.0150716	0.0130352	0.0182322	0.0145457	0.0125435	0.0153602	0.0173811	0.0154076	0.0205413	0.0143582	0.0222765	0.0200103	0.02139	0.0152064	0.0161733	0.0152326	0.0117467	0.0176938	0.0108177	0.0176489	0.0169157	0.0156174	0.0151397	0.011301	0.0108148	0.0126723	0.0125675	0.0120415
M00245	M00245: Cobalt transport system	0.0159387	0.0187435	0.00599437	0.0214717	0.00541112	0.00875256	0.0132885	0.0154187	0.0114614	0.0167006	0.0165038	0.00578213	0.00890214	0.0244191	0.00263627	0.00808111	0	0.00264361	0.0116196	0.0118269	0.0163808	0.00956441	0.0138922	0.015794	0.00403072	0.00776843	0.0145633	0.0201527	0.0163119	0.0110925	0.0100332	0.0144623	0.0068285	0.00903299	0.016393	0.00551161	0	0.0104634	0	0.0159748	0.0168275	0.00693851	0.0185164	0.00906923	0.00864388	0.0032887	0.00496033	0.0115346
M00246	M00246: Nickel transport system	0	0	0.00599437	0	0	0	0.0132885	0	0	0	0	0.0035994	0	0	0	0	0	0	0	0	0.0163741	0	0.0138922	0	0	0	0	0	0	0	0	0	0	0.00903299	0	0.00551161	0	0	0.00565339	0	0	0	0	0	0	0	0	0.00790438
M00260	M00260: DNA polymerase III complex, bacteria	0	0	0	0	0	0	0	0	0	0	0	0	0	0	0	0	0	0	0	0	0	0	0	0	0	0	0	0.00389973	0	0	0	0	0	0	0	0	0	0	0	0	0	0	0	0	0	0.000199021	0	0
M00261	M00261: DNA polymerase alpha / primase complex	0	0	0	0	0.00013028	0	0	0	0.000108967	0	0	0.000786755	0.00425952	0	0	0	0	0	0	0.00754526	1.43144e-05	0.00197279	0	0.00133182	0.000512231	0	0	9.26077e-05	0	0.000638416	0.000106168	0	0	0.000841708	0	0	0	0	0	0	0	0.00110466	0	0.0021114	0.000380686	0	0	0.00257778
M00262	M00262: DNA polymerase delta complex	0	0	0	0	0	0	0	0	0	0	0	0.000694685	0.00323882	0	0	0	0	0	0	0.00579197	0	0.000946708	0	0.000512016	0.000667691	0	0	0	0	5.82929e-05	0	0	0	0	0	0	0	0	0	0	0	0	0	0.00113284	0	0.000126533	0	0.00224937
M00263	M00263: DNA polymerase epsilon complex	0	0	0	0	2.86875e-06	0	0	0	4.4802e-05	0	0	0.000252644	0.00110332	0	0	0	0	0	0	0.00171377	3.7258e-05	0.000426313	0	0	0.0003318	0	3.28272e-06	0.000140531	0	5.00116e-06	5.92997e-05	0	0	0.000369567	0	0	0	0	0	0	0	9.07205e-08	5.71203e-07	0.000654384	0.000385745	0	0	0.0017895
M00270	M00270: PTS system, trehalose-specific II component	0.000588355	0.0011117	0.00331768	0.000158023	0.00274418	0.00146292	0.0126268	0.00307863	0.000614234	0.00337867	0.00173227	0.00278788	0.00577357	0.000193391	0.00251066	0.000284448	0.00177661	0.00198617	0.00972673	0.00018098	0.00662692	0.00213727	0.00157699	0.00186063	0.00157955	0.0014548	0.000906647	0.0014789	0.0123102	0.00204122	0.0113442	0.00617883	0.0141003	0.00718307	0.00286043	0.0104474	0.000838454	0.00786272	0.000566358	0.0098673	0.00115208	0.000854889	0.00105289	0.00255689	0.00301975	0.00182598	0.00234257	0.00273964
M00276	M00276: PTS system, mannose-specific II component	0.0119116	0.0144448	0.0129131	0.0169257	0.0164509	0.0108299	0	0.0132359	0.0112286	0.00781695	0.0136144	0.0106076	0.0102031	0.0106038	0.00386349	0.00901458	0.00496099	0.00298156	0.0150418	0.00686813	0.0141984	0.0129223	0.018419	0.0122685	0.0123019	0.00846301	0.0171023	0.0161345	0	0.0134821	0.01306	0.0136481	0.017329	0.0109372	0.0138737	0.0116842	0.00926938	0.0142824	0.00333774	0.00898809	0.0157207	0.0143602	0.0086306	0.0105474	0.00701019	0.00692954	0.00950848	0.00919159
M00277	M00277: PTS system, N-acetylgalactosamine-specific II component	0	0	0.000374784	0	0.0100867	0	0	0	0	0	0	0	0	0	0	0	0	0	0	0	0.00194348	0	0	0	0	0	0	0	0	0	0	0	0	0	0.000220986	0.00598742	0	0	0	0	0	0	0	0	0.0002962	0	0	0
M00278	M00278: PTS system, sorbose-specific II component	0	0	0	0	0	0	0	0	0	0	0	0	0	0	0	0	0	0	0	0	0	0	0	0	0	0	0	0	0	0	0	0	0	0	0	0	0	0	0	0	0	0	0	0	0	0	0	0
M00284	M00284: Origin recognition complex	0	0	0	0	0	0	0	0	0	0	0	0	0	0	0	0	0	0	0	0	0	0	0	0	0	0	0	0	0	0	0	0	0	0	0	0	0	0	0	0	0	0	0	0	0	0	0	0
M00285	M00285: MCM complex	0	0	0	0	0.000189592	0	0	9.70552e-05	6.67551e-05	0.00120779	0.00370265	0.000866158	0.00487886	0	0	0.000111268	0	0	0	0.00819979	5.68107e-05	0.00193879	0	0.00245927	0.000485664	0	0.000353394	0.000538354	0	0.00102439	0.000145397	0	0	0.000840386	0	0	0	0	0	0	0	0.00234821	0	0.00335345	0.00202155	4.5236e-05	0	0.00507863
M00286	M00286: GINS complex	0	0	0	0	0	0	0	0	0	0	0	2.83011e-05	0.000623567	0	0	0	0	0	0	0.000939094	0	0.000145254	0	0	0	0	0	0	0	0	0	0	0	0	0	0	0	0	0	0	0	0	0	0.00011227	4.11558e-05	0	0	0.000424847
M00287	M00287: PTS system, galactosamine-specific II component	0	0	0	0	0.000511921	0	0	0	0	0	0	0	0	0	0	0	0	0	0	0	5.28536e-05	0	0	0	0	0	0	0	0	3.72339e-06	0	0	0	0	0	0	0	0	0	0	0	0	0	0	0	0	0	0
M00288	M00288: RPA complex	0	0	0	0	0	0	0	0	0	0	0	0	0	0	0	0	0	0	0	0	0	0	0	0	0	0	0	0	0	0	0	0	0	0	0	0	0	0	0	0	0	0	0	0	0	0	0	0
M00290	M00290: Holo-TFIIH complex	0	0	0	0	0	0	0	0	0	0	0	0.000429528	0.00357421	0	0	0	0	0	0	0.00418602	0	0.0011303	0	0.00230877	0	0	0	0	0	0.000808652	0	0	0	0	0	0	0	0	0	0	0	0	0	0	0	0	0	0
M00295	M00295: BRCA1-associated genome surveillance complex (BASC)	0	0	0	0	0	0	0	0	0	0	0	0	0	0	0	0	0	0	0	0	0	0	0	0	0	0	0	0	0	0	0	0	0	0	0	0	0	0	0	0	0	0	0	0	0	0	0	0
M00296	M00296: BER complex	0	0	0	0	0	0	0	0	0	0	0	2.82223e-08	3.21241e-10	0	0	0	0	0	0	0	3.18953e-06	9.34927e-15	0	0	0	0	0	0	0	0	0	0	0	0	0	0	0	0	0	0	0	0	0	1.17618e-11	0	0	0	0
M00299	M00299: Spermidine/putrescine transport system	0.000967859	0.00261514	0.0123596	0	0.0231077	0.00345669	0.00438412	0.00512958	0.000932749	0	6.05404e-05	0.00079967	0.00483235	0.00146907	0.00380109	0.00237156	0.00495042	0.00265024	0.00917307	0.000853113	0.00536099	0.00125369	0.0113262	0.00448588	0.00319594	0.00773775	0.01308	0.00690871	0.00787871	0.00630505	0.0158302	0.00438947	0.0260903	0.00870146	0.00326512	0.0120282	0	0.00955309	0.00402116	0.0104091	0.00615996	0.00289025	0.00215578	0.00216719	0.00229192	0.00178098	0.00391419	0.00556101
M00300	M00300: Putrescine transport system	0.000442274	7.72588e-05	0.00051983	0	0	0.000276398	0	0	2.16756e-05	0	0	0.000149051	0.000153832	0.000821446	0.000264398	0	0	0	0.00032832	9.70505e-05	8.53065e-05	2.91292e-11	0	0.000110854	0	0	0.00032726	0.000779067	0	3.52078e-05	0.000276897	0	0	0.000321568	0.000442825	0	0	0	0.00381073	0	0	0	0.000438054	6.00287e-05	3.66048e-05	0	2.15256e-06	0.00031658
M00301	M00301: Mannopine transport system	0	0	0	0	0	0	0	0	0	0	0	0	0	0	0	0	0	0	0	0	0	0	0	0	0	0	0	0	0	0	0	0	0	0	0	0	0	0	0	0	0	0	0	0	0	0	0	0
M00302	M00302: 2-Aminoethylphosphonate transport system	0	0	0	0	0	0	0	0	0	0	0	0	0	0	0.000134753	0	0	0	0	0	0	0	0	0	0	0	0	0	0	0	0	0	0	0	0	0	0	0	0	0	0	0	0	0	0	0.00108642	0	0
M00304	M00304: PTS system, fructose-specific II component	0	0	0	0	0	0	0	0	0	0	0	0	0	0	0	0	0	0	0	0	0	0	0	0	0	0	0	0	0	0	0	0	0	0	0	0	0	0	0	0	0	0	0	0	0	0	0	0
M00307	M00307: Pyruvate oxidation, pyruvate => acetyl-CoA	0.0118535	0.016027	0.0156482	0.0149301	0.0183586	0.0162726	0.0154708	0.0147084	0.0141027	0.013545	0.0162239	0.0129633	0.0159228	0.0207018	0.0150295	0.00776533	0.00870589	0.0173343	0.016037	0.017415	0.0162205	0.0134701	0.0227264	0.0181591	0.0115258	0.0140802	0.0190839	0.0206621	0.0162759	0.018067	0.0153229	0.0161805	0.0221813	0.0143561	0.016374	0.0150793	0.0169898	0.0175141	0.0146945	0.0138876	0.0173928	0.0156546	0.0167786	0.0132663	0.011745	0.00924114	0.00726478	0.0151072
M00310	M00310: Pyruvate:ferredoxin oxidoreductase	0.0108582	0.0016337	9.76524e-05	0	0.00154283	0	0.00208447	0.0045062	0	0.00155522	0	0.000857158	0.00109068	2.83571e-05	0.00116194	0.00718267	0.0098479	0	0	0	0.00265591	0.00212587	0	0	0.00370436	0.00110207	0	0	0	0.00140971	0.000343401	0.00336408	0	0.00237876	0.00234532	0.00255784	0	0.00483557	0	0.00284241	0.00195187	0	0.00647284	0.00197268	0.00355255	0.00629348	0.00941938	0.00395951
M00311	M00311: 2-oxoglutarate:ferredoxin oxidoreductase	0.00324599	0	0.00205345	0	0	0.00210783	0	0	0	0	0	0.00060453	0.00112879	0.00271681	0.00136414	0	0	0	0.000879045	0	0.000750028	0	0	0.00436968	0	0.0023051	0	0.00203665	0	0.000532404	0.000493491	0	0	0.000269857	0	0.00235267	0	0	0.00257708	0	0.00152463	0	0.00308668	0.000971619	0.00185457	0.00290766	0.002453	0.00078322
M00312	M00312: 2-oxoisovalerate:ferredoxin oxidoreductase	0	0	0	0	0	0	0	0	0	0	0	0	0	0	0	0	0	0	0	0	1.01969e-06	0	0	0	1.44381e-06	0	0	0	0	0	0	0	0	0	0	0	0	0	0	0	0	0	0	1.27777e-12	0	2.25838e-06	0	0
M00317	M00317: Manganese/iron transport system	0	0	0.0012473	0	0	0.00118079	0	0	1.04684e-05	0.000992919	0	0.000625412	0	8.28872e-06	0.00356172	0.000673052	0	0.00370183	8.97985e-06	1.71698e-06	8.476e-05	8.37761e-06	0	0.000429028	1.45627e-07	0	0	0.00160923	0	0.000392685	7.61038e-06	0	0.000459759	0.00016662	0	0.00111915	0.000638695	0	0.00239804	0	0	0	0	0.000543261	0.000741649	0.000751849	0	4.4527e-06
M00319	M00319: Manganese/zinc/iron transport system	0	0.0030305	0.00113775	0.00348175	0.0125458	0.00123445	0	0	0.00346064	0	0.00106104	0.00067244	0.00253323	0.000476635	0.00156209	0.000859456	0	0.00214137	0.00581531	0.000170875	0.00259948	0.000660652	0	0.000738772	0.000554301	0	0.000635057	9.84096e-05	0	0.000688078	0.00811674	0	0.0110413	0.00286736	0.000564537	0.00679356	0	0	0.00236539	0.00239174	0.000101588	0.00193843	0.000851457	0.00117933	0.00113535	0.00169262	0.000688441	0.000286207
M00321	M00321: Bicarbonate transport system	0	0	0	0	0	0	0	0	0	0	0	1.02175e-05	0	0	0	0	0	0	0	0	0	0	0	0	0	0	0	0	0	0	0	0	0	0	0	0	0	0	0	0	0	0	0	0	0	0	0	0
M00322	M00322: Neutral amino acid transport system	0	0	0	0	0	0	0	0	0	0	0	0	0	0	0	0	0	0	0	0	0	0	0	0	0	0	0	0	0	0	0	0	0	0	0	0	0	0	0	0	0	0	0	0	0	0	0	0
M00323	M00323: Urea transport system	0	0	0	0	0	0	0	0	0	0	0	0	0	0	0	0	0	0	0	0	0	0	0	0	0	0	0	0	0	0	0	0	0	0	0	0	0	0	0	0	0	0	0	0	0	0	0	0
M00324	M00324: Dipeptide transport system	0.000861197	0.0010386	0.00092594	7.80823e-06	0.000753217	8.59131e-05	0	0.000171708	0.000770736	3.74473e-08	3.7942e-07	0.000457985	0.000852897	0.000655215	0.000876391	0.00174823	0.000363368	3.30218e-05	0.000990871	0.000280703	0.000777547	0.000682491	0.00101398	0.000910662	0.000320271	0.000205221	7.21416e-06	0.00203793	4.47343e-05	0.000485292	0.00133487	0.000556998	0.00017405	0.00174906	0.000551688	0.000874538	0	0.000268442	0.00135699	0.000135861	0.000934151	0.000102438	0.00116449	0.000481311	7.48826e-05	0.00126922	0.000338845	0.000946972
M00326	M00326: RTX toxin transport system	0	0	0	0	0	0	0	0	0	0	0	0	0	0	1.84075e-05	1.47602e-05	0	0	0	0	7.75155e-06	0	0	0	0	0	0	0	0	0	0	0	0	0	0	0	0	0	0	0	0	0	0	0	0	1.07807e-05	4.82843e-06	0
M00331	M00331: Type II general secretion system	0	0	0	0	0	0	0	0	0	0	0	0	0	0	0	0	0	0	0	0	0	0	0	0	0	0	0	0	0	0	0	0	0	0	0	0	0	0	0	0	0	0	0	0	0	0	0	0
M00332	M00332: Type III secretion system	0	0	0	0	0	0	0	0	0	0	0	0	0	0	0	0	0	0	0	0	0	0	0	0	0	0	0	0	0	0	0	0	0	0	0	0	0	0	0	0	0	0	0	0	0	0	0	0
M00333	M00333: Type IV secretion system	0	0	0	0	0	0	0	0	0	0	0	0	0	0	0	0	0	0	0	0	0	0	0	0	0	0	0	0	0	0	0	0	0	0	0	0	0	0	0	0	0	0	0	0	0	0	0	0
M00334	M00334: Type VI secretion system	0	0	0	0	0	0	0	0	0	0	0	0	2.76042e-07	0	0	0	0	0	0	0	0	0	0	0	0	0	0	1.08641e-05	0	0	0	0	0	0	0	0	0	0	0	0	0	0	0	0	0	0	0	0
M00335	M00335: Sec (secretion) system	0	0	0	0	0	0	0	0	0	0	0	0.00147041	0	0	0	0.00599434	0.007553	0	0	0	0	0	0	0	0	0	0	0.00949123	0	0	0	0	0	0	0	0	0	0	0	0	0	0	0	0	0	0.00570713	0	0
M00336	M00336: Twin-arginine translocation (Tat) system	0	0	0.01248	0	0	0.0136399	0	0	0.0180939	0	0	0.016146	0	0	0.016275	0	0	0	0	0	0	0	0	0	0	0	0.0164418	0.0130803	0	0.0122927	0	0	0	0	0	0.0123181	0.00985619	0	0.00855294	0	0	0	0	0.0143794	0.016939	0	0	0
M00337	M00337: Immunoproteasome	0	0	0	0	0	0	0	0	0	0	0	0	0	0	0	0	0	0	0	0	0	0	0	0	0	0	0	0	0	0	0	0	0	0	0	0	0	0	0	0	0	0	0	0	0	0	0	0
M00340	M00340: Proteasome, 20S core particle	0	0	0	0	0	0	0	0	0	0	0	0.000822823	0.00470946	0	0	0	0	0	0	0.00726781	0	0.00146191	0	0.00232872	0.000662886	0	0	0.000278277	0	0.00103643	0	0	0	0.000842834	0	0	0	0	0	0	0	0	0	0.00265585	0.000336939	0	0	0.00438183
M00341	M00341: Proteasome, 19S regulatory particle (PA700)	0	0	0	0	0	0	0	0	0	0	0	0	0	0	0	0	0	0	0	0	0	0	0	0.00141679	0	0	0	0	0	0	0	0	0	0	0	0	0	0	0	0	0	0	0	0.00263995	0	0	0	0.00371763
M00342	M00342: Bacterial proteasome	0.0144955	0.0100402	0.00280747	0.0112214	0.00443528	0.0039096	0.00786495	0.010376	0.00726614	0.00579559	0.00805908	0.00329217	0.00502145	0.00366857	0.00155839	0	0.00200815	0	0.00767273	0.00670573	0.00938923	0.00639005	0.00356416	0.00435462	0.00312345	0.00241417	0	7.48463e-07	0.00175752	0.00557517	0.00525602	0.0100153	0.00323593	0.00521183	0.00944572	0.00261041	0	0.00540434	0.00164238	0.00606975	0.00800184	0.00550226	0.00858621	0.00635357	0.00512227	0.00448889	0	0.00651623
M00345	M00345: Formaldehyde assimilation, ribulose monophosphate pathway	4.43084e-05	0.000532379	0.00355434	0.0122666	0.0056825	0.00452156	0.0138351	0	0.00438573	0.000182253	0.00555871	0.000624703	0.00202684	0.00202397	0.00109186	0.00634793	0.00916838	0	0.00334565	0.000758108	0.00588359	0.00203498	0.0121279	0.00488645	0.0156405	0.00776723	0.0203629	0.0105649	0.0175012	0.0144004	0.00898632	0.0147851	0.012366	0.00118719	0.00783254	0.00503767	0.00623738	0.0163723	0	0.00652348	0.00969977	0.00460648	0.00606013	0.00307154	0.00620271	0.00242556	0.00682849	0.00892671
M00346	M00346: Formaldehyde assimilation, serine pathway	0	0	0	0	0	0	0	0	0	0	0	0	0	0	0	0	0	0	0	0	6.22937e-08	0	0	0	0	0	0	0	0	0	0	0	0	0	0	0	0	0	0	0	0	0	0	0	0	0	0	0
M00347	M00347: Methanogenesis, formate => methane	0	0	0	0	0	0	0	0	0	0	0	0	0	0	0	0	0	0	0	0	0	0	0	0	0	0	0	0	0	0	0	0	0	0	0	0	0	0	0	0	0	0	0	0	0	0	0	0
M00348	M00348: Glutathione transport system	2.70198e-05	0.000144855	6.2348e-05	0	0.000598807	4.11393e-05	0	1.52691e-05	0.000403598	0	1.71669e-05	0.000102384	0.000357467	0.00049902	9.2674e-05	3.51385e-05	1.9283e-06	2.72863e-07	0.000337682	5.59185e-05	0.000436072	1.27678e-05	9.47033e-06	6.34704e-05	2.33448e-05	7.5231e-06	0.000427307	0.000490421	0	5.09712e-05	0.000288152	2.68887e-05	1.90209e-05	0.000193025	0.000373898	0.000125335	0	7.92205e-06	2.95177e-05	3.29547e-05	0.000125818	0	0.000449311	4.96883e-05	2.50976e-06	0.000242631	4.30954e-05	4.09112e-07
M00349	M00349: Microcin C transport system	0.000569898	0	0.000394062	0	0.000166471	0.000301498	0	0	5.24066e-05	0	0.000170286	0.000162802	1.26459e-05	0.000151354	9.25554e-05	0.000491228	0	0	0.000365261	3.50426e-06	0.000437426	2.22301e-06	0	7.06539e-05	4.96466e-05	0	0.00108861	0.00140218	4.59315e-05	1.32397e-05	0.000353807	0.000263253	0	0.00019978	0.000260954	5.96588e-05	0	0.00014469	0.00286536	0.000608913	0.00019861	9.58074e-05	0.00115775	0.00049055	3.3973e-05	0.000736309	0.000183683	3.39798e-05
M00350	M00350: Capsaicin biosynthesis, L-Phenylalanine => Capsaicin	0	0	0	0	0	0	0	0	0	0	0	0	0	0	0	0	0	0	0	0	0	0	0	0	0	0	0	0	0	0	0	0	0	0	0	0	0	0	0	0	0	0	0	0	0	0	0	1.48065e-12
M00351	M00351: Spliceosome, U1-snRNP	0	0	0	0	0	0	0	0	0	0	0	0.000464984	0	0	0	0	0	0	0	0	0	0	0	0	0	0	0	0	0	0.000329416	0	0	0	0	0	0	0	0	0	0	0	0	0	7.77809e-05	0.000801895	0	0	0.00279604
M00352	M00352: Spliceosome, U2-snRNP	0	0	0	0	0	0	0	0	0	0	0	0.000304444	0.00101217	0	0	0	0	0	0	0.00333866	0	0	0	0	0	0	0	0	0	0	0	0	0	0	0	0	0	0	0	0	0	0	0	0.000879425	5.26493e-05	0	0	0.000562832
M00353	M00353: Spliceosome, Prp19/CDC5L complex	0	0	0	0	0	0	0	0	0	0	0	0.000195156	0.00126931	0	0	0	0	0	0	0	9.46969e-06	0.000319091	0	0.000286972	5.83997e-05	0	0	0	0	0	1.79049e-05	0	0	0	0	0	0	0	0	0	0	0	0	0.000861015	0	0	0	0.000895859
M00354	M00354: Spliceosome, U4/U6.U5 tri-snRNP	0	0	0	0	0	0	0	0	0	0	0	0.000576162	0.00295795	0	0	0	0	0	0	0.00337603	0	0.000985752	0	0	0	0	0	0	0	0	0	0	0	0	0	0	0	0	0	0	0	0	0	0	0.000739778	0	0	0.00247041
M00355	M00355: Spliceosome, 35S U5-snRNP	0	0	0	0	0	0	0	0	0	0	0	0.000155053	0.000120764	0	0	0	0	0	0	0.000601699	0	1.29221e-05	0	0	0	0	0	0	0	0.000134254	0	0	0	0	0	0	0	0	0	0	0	0	0	0.000678381	0	0	0	0.00142559
M00356	M00356: Methanogenesis, methanol => methane	0	0	0	0	0	0	0	0	0	0	0	0	0	0	0	0	0	0	0	0	0	0	0	0	0	0	0	0	0	0	0	0	0	0	0	0	0	0	0	0	0	0	0	0	0	0	0	0
M00357	M00357: Methanogenesis, acetate => methane	0	0	0	0	0	0	0	0	0	0	0	0	0	0	0	0	0	0	0	0	0	0	0	0	0	0	0	0	0	0	0	0	0	0	0	0	0	0	0	0	0	0	0	0	0	0	0	0
M00358	M00358: Coenzyme M biosynthesis	0	0	0	0	0	0	0	0	0	0	0	0	0	0	0	0	0	0	0	0	0	0	0	0	0	0	0	0	0	0	0	0	0	0	0	0	0	0	0	0	0	0	0	0	0	0	0	0
M00359	M00359: Aminoacyl-tRNA biosynthesis, eukaryotes	0.02274	0.0242371	0.0227056	0.0269922	0.0234711	0.0226099	0.0202263	0.0269905	0.0135895	0.0153719	0.020449	0.014648	0.0214164	0.0169558	0.0187546	0.0160945	0.0225461	0.026331	0.0213124	0.0225669	0.0190775	0.0176679	0.020869	0.0209347	0.0165741	0.0238541	0.0210224	0.0190278	0.0233938	0.0203075	0.0212888	0.0204869	0.0253128	0.0208421	0.0178541	0.0229601	0.0216312	0.0227182	0.0197271	0.0176726	0.0239124	0.021646	0.0257472	0.0182137	0.0205951	0.0104909	0.0156723	0.0213139
M00360	M00360: Aminoacyl-tRNA biosynthesis, prokaryotes	0.0255295	0.0259362	0.0246296	0.0304277	0.0311559	0.0217636	0.0221365	0.0240088	0.0175711	0.018751	0.0222478	0.018435	0.02274	0.0193787	0.0212666	0.0205612	0.0249285	0.0235329	0.0235397	0.0235391	0.021306	0.0206839	0.023009	0.0219259	0.0205219	0.0252192	0.022431	0.0198541	0.0235341	0.0222837	0.0248067	0.0228696	0.0312953	0.0228263	0.0210492	0.0250423	0.0242868	0.0248391	0.0212	0.0210949	0.0255302	0.0248614	0.0222936	0.0206747	0.0226984	0.0143849	0.0194404	0.0230351
M00361	M00361: Nucleotide sugar biosynthesis, eukaryotes	0	0	0.00197899	0	0	0	0.00528882	0	0	0.0103664	0	0.00361716	0	0	0	0	0.00129807	0	0	0	0	0	0.00824584	0	0	0	0	0	0.00597296	0	0	0.00659315	0	0	0	0	0	0.00592028	0	0	0	0	0	0.00891914	0	0.000210419	0	0.00812394
M00362	M00362: Nucleotide sugar biosynthesis, prokaryotes	0	0	0.000316702	0	0	0	1.16655e-05	0	0	2.84418e-07	0	6.34029e-05	0	0	0	0	0.000612223	0	0	0	0	0	0	0	0	0	0	0	0.000965618	0	0	5.52722e-05	0	0	0	0	0	3.00371e-06	0	0	0	0	0	4.3415e-08	0	0.00032026	0	0.000112049
M00364	M00364: C10-C20 isoprenoid biosynthesis, bacteria	0.00769017	0.00556672	0.00710978	0	0.00775469	0.00735787	0	0.00404465	0.00218276	0.00239881	0.00413448	0.00440662	0.00496387	0.00655968	0.00568186	0.00629385	0.00486621	0.00267097	0.00629523	0.00387481	0.00537004	0.00243941	0.0108958	0.00608586	0.00617032	0.00971607	0.00566675	0.00970871	0.00742061	0.00630619	0.0078568	0.00925617	0.00718141	0.00708144	0.00667106	0.00743145	0.00572705	0.00801702	0.00541638	0.0100598	0.00347651	0.00240431	0.000317518	0.00262238	0.00471044	0.00299914	0.00247592	0.00647215
M00366	M00366: C10-C20 isoprenoid biosynthesis, plants	0	0	0	0	0	0	0	0	4.25557e-05	0	0.0027946	0	0.00306018	0	0	0	0	0	0	0.00272531	0	0.00119386	0	0	0	0	0	0.000254581	0	0	0	0	0	0.00185322	0	0	0	0	0	0	0	0	0	0	0	0	0	0
M00370	M00370: Glucosinolate biosynthesis, tryptophan => glucobrassicin	0	0	0	0	0	0	0	0	0	0	0	0	0	0	0	0	0	0	0	0	0	0	0	0	0	0	0	0	0	0	0	0	0	0	0	0	0	0	0	0	0	0	0	0	0	0	0	0
M00371	M00371: Castasterone biosynthesis, campesterol => castasterone	0	0	0	0	0	0	0	0	0	0	0	0	0	0	0	0	0	0	0	0	0	0	0	0	0	0	0	0	0	0	0	0	0	0	0	0	0	0	0	0	0	0	0	0	0	0	0	0
M00372	M00372: Abscisic acid biosynthesis, beta-carotene => abscisic acid	0	0	0	0	0	0	0	0	0	0	0	0	0	0	0	0	0	0	0	0	0	0	0	0	0	0	0	0	0	0	0	0	0	0	0	0	0	0	0	0	0	0	0	0	0	0	0	0
M00373	M00373: Ethylmalonyl pathway	0	0	0	0	0	0	0	0	0	0	0	0	0	0	0	0	0	0	0	0	0	0	0	0	0	0	0	0	0	0	0	0	0	0	0	0	0	0	0	0	0	0	0	0	0	0	0	0
M00374	M00374: Dicarboxylate-hydroxybutyrate cycle	0	0	0	0	0	0	0	0	0	0	0	0	0	0	0	0	0	0	0	0	0	0	0	0	0	0	0	0	0	0	0	0	0	0	0	0	0	0	0	0	0	0	0	0	0	0	0	0
M00375	M00375: Hydroxypropionate-hydroxybutylate cycle	0	0	0	0	0	0	0	0	0	0	0	0	0	0	0	0	0	0	0	0	0	0	0	0	0	0	0	0	0	0	0	0	0	0	0	0	0	0	0	0	0	0	0	0	0	0	0	0
M00376	M00376: 3-Hydroxypropionate bicycle	0	0	0	0	0	0	0	0	0	0	0	0	0	0	0	0	0	0	0	0	0	0	0	0	0	0	0	0	0	0	0	0	0	0	0	0	0	0	0	0	0	0	0	0	0	0	0	0
M00377	M00377: C10-C20 isoprenoid biosynthesis, non-plant eukaryotes	0	0	0	0	0	0	0	0	0	0	0	0	0	0	0	0	0	0	0	0	0	0	0	0	0	0	0	0	0	0	0	0	0	0	0	0	0	0	0	0	0	0	0	0	0	0	0	0
[truncated: 601 more columns]
