# Supplementary material for: Metabolic Reconstruction for Metagenomic Data and Its Application to the Human Microbiome
Source: PLoS Comput Biol. 2012 Jun 13;8(6):e1002358. doi: 10.1371/journal.pcbi.1002358 (PMC3374609; doi:10.1371/journal.pcbi.1002358)
Supplement: Table S6 — Core and differentially covered modules in the human microbiome. Metabolic modules determined to be core and variable across body sites based on coverage estimates from the HUMAnN pipeline. Core modules were defined with coverage ≥0.9 (or at a lower stringency ≥0.3 threshold) in ≥90% of the samples from each body site. Variable modules were defined to be present (as above) in at least one body site and absent (≤0.1 in ≥90% of samples) in at least one body site. 24 samples. Using these definitions, 16 modules were core across all body sites at coverage 0.9 and 24 at 0.3, and 24 modules were variably covered among body sites. (XLSX) [file pcbi.1002358.s011.xlsx]

## Sheet: humann-mpm-cov_subset
	Site	AN	BM	PF	RC	St	SupP	TD
	Total samples	87	109	53	26	136	115	123
		Core @ 90%	Core @ 30%	Variable	1 if >=90% in >=90% of samples, -1 if <=10% in >=90% of samples							Count of coverage <= 0.1							Count of coverage >= 0.3							Count of coverage >= 0.9
ID	NAME	16	24	24	AN	BM	PF	RC	St	SupP	TD	AN	BM	PF	RC	St	SupP	TD	AN	BM	PF	RC	St	SupP	TD	AN	BM	PF	RC	St	SupP	TD
M00001	M00001: Glycolysis (Embden-Meyerhof pathway), glucose => pyruvate	1	1	0	1	1	1	1	1	1	1	0	0	0	0	0	0	0	87	109	53	26	136	115	123	86	109	53	26	136	115	123
M00002	M00002: Glycolysis, core module involving three-carbon compounds	1	1	0	1	1	1	1	1	1	1	0	0	0	0	0	0	0	87	109	53	26	136	115	123	87	109	53	26	136	115	123
M00006	M00006: Pentose phosphate pathway, oxidative phase, glucose 6P => ribulose 5P	1	1	0	1	1	1	1	1	1	1	0	0	0	0	0	0	0	87	109	53	26	136	115	123	83	109	53	26	136	115	123
M00049	M00049: Adenine nucleotide biosynthesis, IMP => ADP/dADP,ATP/dATP	1	1	0	1	1	1	1	1	1	1	0	0	0	0	0	0	0	87	109	53	26	136	115	123	87	109	53	26	136	115	123
M00050	M00050: Guanine nucleotide biosynthesis, IMP => GDP/dGDP,GTP/dGTP	1	1	0	1	1	1	1	1	1	1	0	0	0	0	0	0	0	87	109	53	26	136	115	123	87	109	53	26	136	115	123
M00052	M00052: Pyrimidine ribonucleotide biosynthesis, UMP => UDP/UTP,CDP/CTP	1	1	0	1	1	1	1	1	1	1	0	0	0	0	0	0	0	87	109	53	26	136	115	123	87	109	52	26	136	115	123
M00120	M00120: Coenzyme A biosynthesis, pantothenate => CoA	1	1	0	1	1	1	1	1	1	1	0	0	0	0	0	0	0	87	109	53	26	136	115	123	87	109	53	26	136	115	123
M00125	M00125: Riboflavin biosynthesis, GTP => riboflavin/FMN/FAD	1	1	0	1	1	1	1	1	1	1	0	0	3	0	0	0	0	87	109	50	26	136	115	123	87	109	48	26	136	115	123
M00157	M00157: F-type ATPase, bacteria	1	1	0	1	1	1	1	1	1	1	1	0	0	0	0	0	0	86	109	53	26	136	115	123	86	109	53	26	136	115	123
M00164	M00164: ATP synthase	1	1	0	1	1	1	1	1	1	1	1	0	0	0	0	0	0	86	109	53	26	136	115	123	86	109	53	26	136	115	123
M00178	M00178: Ribosome, bacteria	1	1	0	1	1	1	1	1	1	1	7	0	0	0	0	0	0	80	109	53	26	136	115	123	80	109	53	26	136	115	123
M00183	M00183: RNA polymerase, bacteria	1	1	0	1	1	1	1	1	1	1	0	0	0	0	0	0	0	87	109	53	26	136	115	123	87	109	53	26	136	115	123
M00207	M00207: Multiple sugar transport system	1	1	0	1	1	1	1	1	1	1	0	0	0	0	0	0	0	87	109	53	26	136	115	123	83	109	53	26	136	115	123
M00222	M00222: Phosphate transport system	1	1	0	1	1	1	1	1	1	1	0	0	0	0	0	0	0	87	109	53	26	136	115	123	85	109	53	26	136	115	123
M00239	M00239: Peptides/nickel transport system	1	1	0	1	1	1	1	1	1	1	0	0	0	0	0	0	0	87	109	53	26	136	115	123	87	109	53	26	136	115	123
M00360	M00360: Aminoacyl-tRNA biosynthesis, prokaryotes	1	1	0	1	1	1	1	1	1	1	1	0	0	0	0	0	0	86	109	53	26	136	115	123	86	109	53	26	136	115	123
M00004	M00004: Pentose phosphate pathway (Pentose phosphate cycle)	0	1	0	1	1	0	1	1	1	1	0	0	5	0	0	0	0	87	109	48	26	136	115	123	83	109	38	26	136	115	123
M00018	M00018: Threonine biosynthesis, apartate => homoserine => threonine	0	1	0	1	1	0	1	1	1	1	0	0	5	0	0	0	0	87	109	48	26	136	115	123	87	109	43	26	136	115	123
M00197	M00197: Putative sugar transport system	0	1	0	0	1	1	1	1	1	1	2	0	0	0	0	0	0	84	109	53	26	136	115	123	78	109	53	26	136	115	123
M00198	M00198: sn-Glycerol 3-phosphate transport system	0	1	0	0	0	0	1	1	1	1	4	1	0	0	0	0	0	82	104	53	26	136	115	123	67	91	46	26	136	115	123
M00270	M00270: PTS system, trehalose-specific II component	0	1	0	0	1	0	1	1	1	1	3	0	1	0	0	0	0	81	109	52	26	136	115	123	57	109	47	26	136	115	123
M00276	M00276: PTS system, mannose-specific II component	0	1	0	0	1	1	1	1	1	1	8	0	0	0	0	0	0	79	109	53	26	136	115	123	77	109	53	26	136	115	123
M00299	M00299: Spermidine/putrescine transport system	0	1	0	0	1	1	1	1	1	1	6	0	0	1	0	0	0	81	109	53	25	136	115	123	71	109	53	25	136	115	123
M00364	M00364: C10-C20 isoprenoid biosynthesis, bacteria	0	1	0	0	1	0	1	1	1	1	3	0	0	0	0	0	0	84	109	53	26	136	115	123	72	109	37	26	136	115	123
M00019	M00019: Leucine biosynthesis, pyruvate => 2-oxoisovalerate => leucine	0	0	1	0	1	-1	0	1	1	1	51	0	53	11	0	0	0	36	109	0	15	136	115	123	32	109	0	15	136	115	123
M00060	M00060: Lipopolysaccharide biosynthesis, KDO2-lipid A	0	0	1	0	1	-1	0	1	1	1	38	0	50	12	3	0	0	47	109	3	14	133	115	123	32	109	3	14	133	115	123
M00076	M00076: Dermatan sulfate degradation	0	0	1	-1	0	-1	0	1	0	0	83	82	52	20	2	29	30	3	13	1	5	134	62	79	0	1	0	1	134	21	40
M00077	M00077: Chondroitin sulfate degradation	0	0	1	0	0	-1	0	1	0	1	67	50	48	19	0	16	4	15	36	4	5	136	92	119	2	9	1	3	136	52	114
M00079	M00079: Keratan sulfate degradation	0	0	1	0	0	-1	0	1	0	1	75	24	49	21	0	20	0	7	65	4	3	136	89	123	0	22	1	2	136	61	123
M00117	M00117: Ubiquinone biosynthesis, prokaryotes, chorismate => ubiquinone	0	0	1	0	0	-1	0	0	1	0	60	15	48	15	22	1	13	26	89	4	7	109	113	107	9	58	0	1	83	113	99
M00142	M00142: Complex I (NADH dehydrogenase), NADH dehydrogenase I	0	0	1	0	0	-1	1	-1	0	-1	47	98	48	1	135	103	119	40	10	5	25	1	12	3	26	2	4	25	0	9	2
M00150	M00150: Complex II (succinate dehydrogenase / fumarate reductase), fumarate reductase	0	0	1	0	1	-1	0	0	1	1	70	0	52	21	12	0	0	17	109	1	5	122	115	123	9	109	1	4	110	115	123
M00156	M00156: Complex IV (Cytochrome c oxidase), cytochrome c oxidase, cbb3-type	0	0	1	0	1	0	0	-1	1	1	60	7	45	19	130	0	0	27	102	6	7	5	115	123	23	100	2	4	3	115	123
M00172	M00172: C4-dicarboxylic acid cycle, NADP+ -malic enzyme type	0	0	1	-1	0	0	0	1	1	1	81	29	46	20	7	2	0	6	80	7	4	128	113	123	5	80	4	4	127	113	123
M00202	M00202: Oligogalacturonide transport system	0	0	1	-1	0	-1	0	1	0	0	81	60	49	20	0	5	1	4	32	4	6	136	107	118	1	6	2	5	130	75	101
M00219	M00219: AI-2 transport system	0	0	1	-1	0	-1	-1	0	0	1	81	46	50	26	31	8	0	3	46	3	0	84	105	123	0	17	3	0	52	89	120
M00229	M00229: Arginine transport system	0	0	1	0	1	-1	-1	0	1	1	62	0	51	24	35	0	0	19	109	2	2	86	115	123	7	109	1	2	50	115	123
M00246	M00246: Nickel transport system	0	0	1	0	1	-1	0	0	1	1	67	0	53	17	52	0	0	20	109	0	9	84	115	123	20	109	0	9	84	115	123
M00287	M00287: PTS system, galactosamine-specific II component	0	0	1	-1	0	0	0	0	0	1	83	62	41	22	4	54	0	4	38	12	4	128	47	123	0	14	10	1	101	22	123
M00310	M00310: Pyruvate:ferredoxin oxidoreductase	0	0	1	0	0	-1	0	1	0	0	33	62	49	4	0	60	4	53	29	2	21	136	44	119	42	7	1	15	136	28	107
M00312	M00312: 2-oxoisovalerate:ferredoxin oxidoreductase	0	0	1	-1	-1	-1	-1	1	-1	0	86	105	52	24	0	110	73	0	1	1	2	136	3	46	0	0	0	0	136	1	26
M00317	M00317: Manganese/iron transport system	0	0	1	0	1	-1	0	0	1	1	53	0	51	18	104	0	0	29	109	1	4	27	115	123	10	105	1	1	11	115	123
M00326	M00326: RTX toxin transport system	0	0	1	-1	0	-1	0	0	1	0	85	35	50	18	7	0	4	0	59	3	4	123	115	118	0	14	1	0	102	114	107
M00334	M00334: Type VI secretion system	0	0	1	-1	0	-1	-1	0	0	1	86	37	50	26	105	3	0	1	56	3	0	21	108	123	0	10	0	0	4	98	120
M00336	M00336: Twin-arginine translocation (Tat) system	0	0	1	0	0	-1	0	0	1	1	63	20	51	21	71	3	10	24	89	2	5	65	112	113	21	89	1	5	65	112	113
M00342	M00342: Bacterial proteasome	0	0	1	0	0	-1	1	0	0	0	14	62	49	1	94	93	58	73	39	3	25	32	14	64	66	27	0	24	11	5	54
M00361	M00361: Nucleotide sugar biosynthesis, eukaryotes	0	0	1	0	0	-1	0	1	0	0	65	57	51	3	1	37	29	22	35	2	23	135	65	88	19	11	0	23	135	32	77
M00362	M00362: Nucleotide sugar biosynthesis, prokaryotes	0	0	1	0	0	-1	0	1	0	0	78	33	52	6	1	28	25	8	57	1	17	135	78	94	1	17	0	10	130	44	80
M00003	M00003: Gluconeogenesis, oxaloacetate => fructose-6P	0	0	0	1	1	0	1	1	1	1	0	0	16	0	0	0	0	87	109	36	26	136	115	123	86	109	26	26	136	115	123
M00007	M00007: Pentose phosphate pathway, non-oxidative phase, fructose 6P => ribose 5P	0	0	0	1	1	0	1	1	1	1	0	0	5	0	0	0	0	87	109	46	26	136	115	123	87	109	39	26	136	115	123
M00008	M00008: Entner-Doudoroff pathway, glucose-6P => glyceraldehyde-3P + pyruvate	0	0	0	0	1	0	0	1	1	1	33	3	32	5	0	0	0	54	106	21	21	136	115	123	48	106	16	20	136	115	123
M00009	M00009: Citrate cycle (TCA cycle, Krebs cycle)	0	0	0	0	1	0	0	0	1	1	25	0	44	6	31	0	0	62	109	8	20	95	115	123	61	109	5	14	69	115	123
M00010	M00010: Citrate cycle, first carbon oxidation	0	0	0	1	1	0	1	1	1	1	0	0	13	0	0	0	0	87	109	36	26	136	115	123	87	109	23	26	136	115	123
M00011	M00011: Citrate cycle, second carbon oxidation	0	0	0	0	1	0	0	0	1	1	21	0	44	1	33	0	0	66	109	9	24	93	115	123	63	109	5	23	70	115	123
M00012	M00012: Glyoxylate cycle	0	0	0	0	0	0	1	0	1	0	5	13	36	0	55	1	35	79	87	16	26	64	114	70	66	60	6	26	32	112	35
M00013	M00013: Malonate semialdehyde pathway, propanoyl-CoA => Acetyl-CoA	0	0	0	-1	-1	-1	-1	-1	-1	-1	87	109	53	26	136	115	123	0	0	0	0	0	0	0	0	0	0	0	0	0	0
M00014	M00014: Glucuronate pathway (uronate pathway)	0	0	0	-1	-1	-1	0	0	0	-1	83	103	53	19	45	26	122	2	3	0	7	77	71	0	0	0	0	3	52	36	0
M00015	M00015: Proline biosynthesis, glutamate => proline	0	0	0	1	1	0	1	1	1	1	0	0	17	0	0	0	0	87	109	35	26	136	115	123	86	109	25	26	136	115	123
M00016	M00016: Lysine biosynthesis, aspartate => lysine	0	0	0	1	1	0	1	1	1	1	0	0	8	0	0	0	0	87	109	44	26	136	115	123	82	108	35	26	136	115	123
M00017	M00017: Methionine biosynthesis, apartate => homoserine => methionine	0	0	0	0	1	0	0	1	1	1	11	0	18	4	0	0	0	76	109	32	19	136	115	123	62	109	16	14	136	115	123
M00021	M00021: Cysteine biosynthesis, serine => cysteine	0	0	0	1	1	0	1	1	1	1	0	0	10	0	0	0	0	87	109	40	26	136	115	123	87	109	25	26	136	115	123
M00022	M00022: Shikimate pathway, phosphoenolpyruvate + erythrose-4P => chorismate	0	0	0	1	1	0	1	1	1	1	0	0	16	0	0	0	0	87	109	37	26	136	115	123	86	109	20	26	136	115	123
M00023	M00023: Tryptophan biosynthesis, chorismate => tryptophan	0	0	0	1	1	0	1	1	1	1	1	0	25	0	0	0	0	86	109	26	26	136	115	123	86	109	13	26	136	115	123
M00024	M00024: Phenylalanine biosynthesis, chorismate => phenylalanine	0	0	0	0	1	0	0	1	1	1	10	0	15	2	0	0	0	76	109	37	24	136	115	123	49	108	17	17	136	115	123
M00025	M00025: Tyrosine biosynthesis, chorismate => tyrosine	0	0	0	0	1	0	0	1	1	1	6	0	18	1	0	0	0	78	109	33	25	136	115	123	53	109	15	17	136	115	123
M00026	M00026: Histidine biosynthesis, PRPP => histidine	0	0	0	0	1	0	0	1	1	1	23	0	43	3	0	0	0	63	109	9	22	136	115	123	27	108	3	21	136	115	123
M00027	M00027: GABA (gamma-Aminobutyrate) shunt	0	0	0	0	0	0	1	1	1	1	10	5	36	0	0	2	0	73	103	14	26	136	113	123	41	83	3	25	136	111	122
M00028	M00028: Ornithine biosynthesis, glutamate => ornithine	0	0	0	1	1	0	1	1	1	1	0	0	19	0	0	0	0	87	109	33	26	136	115	123	83	109	15	26	136	115	123
M00029	M00029: Urea cycle	0	0	0	0	0	0	1	1	1	1	17	2	33	0	0	0	0	67	107	18	26	136	115	123	46	98	6	26	136	115	123
M00030	M00030: Lysine biosynthesis, 2-oxoglutarate => 2-aminoadipate => lysine	0	0	0	0	-1	-1	0	-1	-1	-1	68	107	51	8	134	113	123	11	1	2	18	0	2	0	0	0	0	16	0	0	0
M00031	M00031: Lysine biosynthesis, archaea, 2-aminoadipate => lysine	0	0	0	-1	-1	-1	-1	0	-1	-1	87	109	53	26	56	104	123	0	0	0	0	65	9	0	0	0	0	0	31	3	0
M00032	M00032: Lysine degradation, lysine => saccharopine => acetoacetyl-CoA	0	0	0	0	-1	-1	0	0	-1	-1	50	107	53	5	115	113	122	28	1	0	20	14	2	0	0	0	0	19	7	0	0
M00033	M00033: Ectoine biosynthesis	0	0	0	-1	-1	-1	-1	-1	-1	-1	87	104	52	24	128	109	123	0	1	0	0	2	5	0	0	0	0	0	1	4	0
M00034	M00034: Methionine salvage pathway	0	0	0	-1	-1	-1	0	0	-1	-1	80	103	52	18	80	114	120	7	3	1	7	41	1	1	0	0	1	2	9	1	0
M00035	M00035: Methionine degradation	0	0	0	0	1	0	1	1	1	1	4	0	14	0	0	0	0	83	109	38	26	136	115	123	77	107	24	26	136	115	123
M00036	M00036: Leucine degradation, leucine => acetoacetate + acetyl-CoA	0	0	0	0	0	0	0	0	0	0	55	33	46	9	79	10	61	24	67	5	8	46	100	56	4	31	0	3	18	89	36
M00037	M00037: Melatonin biosynthesis, tryptophan => serotonin => melatonin	0	0	0	-1	-1	-1	-1	-1	-1	-1	87	109	53	26	135	115	123	0	0	0	0	0	0	0	0	0	0	0	0	0	0
M00038	M00038: Tryptophan metabolism, tryptophan => kynurenine => 2-aminomuconate	0	0	0	-1	-1	-1	-1	-1	-1	-1	87	109	53	26	135	115	123	0	0	0	0	1	0	0	0	0	0	0	0	0	0
M00039	M00039: Lignin biosynthesis, cinnamate => lignin	0	0	0	-1	-1	-1	-1	-1	-1	-1	87	109	53	26	136	115	123	0	0	0	0	0	0	0	0	0	0	0	0	0	0
M00042	M00042: Catecholamine biosynthesis, tyrosine => dopamine => noradrenaline => adrenaline	0	0	0	-1	-1	-1	-1	-1	-1	-1	87	109	53	26	136	115	123	0	0	0	0	0	0	0	0	0	0	0	0	0	0
M00044	M00044: Tyrosine degradation, tyrosine => homogentisate	0	0	0	-1	-1	-1	-1	-1	-1	-1	87	109	53	26	136	115	123	0	0	0	0	0	0	0	0	0	0	0	0	0	0
M00045	M00045: Histidine degradation, histidine => N-formiminoglutamate => glutamate	0	0	0	1	1	0	1	1	1	1	1	1	35	0	0	0	0	86	108	17	26	136	115	123	83	107	8	26	136	115	123
M00046	M00046: beta-Alanine biosynthesis, cytosine / uracil => beta-alanine	0	0	0	0	0	0	0	1	0	1	65	37	42	2	1	35	0	20	49	10	20	134	70	123	2	16	0	11	130	34	122
M00048	M00048: Inosine monophosphate biosynthesis, PRPP + glutamine => IMP	0	0	0	1	1	0	1	1	1	1	0	0	19	0	0	0	0	86	109	34	26	136	115	123	86	109	25	26	136	115	123
M00051	M00051: Uridine monophosphate biosynthesis, glutamine (+ PRPP) => UMP	0	0	0	0	1	0	1	1	1	1	10	0	5	0	0	0	0	77	109	44	26	136	115	123	66	108	23	25	136	115	123
M00053	M00053: Pyrimidine deoxyribonuleotide biosynthesis, CDP/CTP => dCDP/dCTP,dTDP/dTTP	0	0	0	1	1	0	1	1	1	1	0	0	20	0	0	0	0	87	109	33	26	136	115	123	83	109	30	26	135	115	123
M00055	M00055: N-glycan precursor biosynthesis	0	0	0	0	-1	-1	0	-1	-1	-1	75	108	52	6	131	114	123	12	0	1	20	3	1	0	7	0	0	19	1	0	0
M00056	M00056: O-glycan biosynthesis, mucin type core	0	0	0	-1	-1	-1	-1	-1	-1	-1	87	109	53	26	136	115	123	0	0	0	0	0	0	0	0	0	0	0	0	0	0
M00057	M00057: Glycosaminoglycan biosynthesis, linkage tetrasaccharide	0	0	0	-1	-1	-1	-1	-1	0	-1	87	105	52	25	130	100	117	0	0	1	0	5	10	3	0	0	0	0	1	3	0
M00058	M00058: Glycosaminoglycan biosynthesis, chondroitin sulfate backbone	0	0	0	-1	-1	-1	-1	-1	-1	-1	87	109	52	25	136	114	120	0	0	1	1	0	1	3	0	0	0	0	0	0	1
M00059	M00059: Glycosaminoglycan biosynthesis, heparan sulfate backbone	0	0	0	-1	-1	-1	0	-1	-1	-1	87	109	53	22	136	114	123	0	0	0	3	0	1	0	0	0	0	2	0	0	0
M00061	M00061: Uronic acid metabolism	0	0	0	0	0	0	0	1	0	1	57	18	46	15	0	12	0	30	86	7	9	136	100	122	11	58	3	5	136	91	120
M00064	M00064: ADP-L-glycero-D-manno-heptose biosynthesis	0	0	0	0	1	0	0	1	1	1	38	0	38	7	0	0	0	42	109	12	17	136	115	123	21	109	4	12	136	115	123
M00065	M00065: GPI-anchor biosynthesis, core oligosaccharide	0	0	0	-1	-1	-1	0	-1	-1	-1	79	108	52	13	136	114	123	5	0	1	12	0	1	0	2	0	0	10	0	0	0
M00070	M00070: Glycosphingolipid biosynthesis, lacto-series, LacCer => Lc4Cer	0	0	0	-1	-1	-1	-1	-1	-1	-1	87	109	53	25	136	115	123	0	0	0	0	0	0	0	0	0	0	0	0	0	0
M00071	M00071: Glycosphingolipid biosynthesis, neolacto-series, LacCer => nLc4Cer	0	0	0	-1	-1	-1	-1	-1	-1	-1	86	109	52	24	136	115	123	1	0	1	0	0	0	0	0	0	0	0	0	0	0
M00072	M00072: Oligosaccharyltransferase	0	0	0	-1	-1	-1	0	-1	-1	-1	84	108	52	9	136	114	123	1	0	1	17	0	1	0	1	0	1	16	0	0	0
M00074	M00074: N-glycan biosynthesis, high-mannose type	0	0	0	-1	-1	-1	-1	-1	-1	-1	87	109	52	26	136	115	123	0	0	1	0	0	0	0	0	0	0	0	0	0	0
M00078	M00078: Heparan sulfate degradation	0	0	0	-1	-1	-1	-1	-1	-1	-1	87	109	53	26	126	115	123	0	0	0	0	7	0	0	0	0	0	0	2	0	0
M00080	M00080: Lipopolysaccharide biosynthesis, inner core => outer core => O-antigen	0	0	0	-1	-1	-1	-1	-1	-1	-1	87	109	53	26	135	115	123	0	0	0	0	0	0	0	0	0	0	0	0	0	0
M00082	M00082: Fatty acid biosynthesis, initiation	0	0	0	0	-1	-1	-1	-1	0	0	75	102	51	25	136	69	102	6	2	2	0	0	32	4	0	0	0	0	0	4	0
M00083	M00083: Fatty acid biosynthesis, elongation	0	0	0	1	1	0	1	1	1	1	0	0	6	0	0	0	0	87	109	46	26	136	115	123	82	109	35	26	136	115	123
M00085	M00085: Fatty acid biosynthesis, elongation, mitochondria	0	0	0	0	-1	-1	0	0	-1	-1	65	105	51	7	92	113	120	13	0	2	18	29	0	1	1	0	0	13	9	0	0
M00087	M00087: beta-Oxidation	0	0	0	0	0	0	1	1	0	0	4	9	22	1	0	5	4	79	90	24	25	136	106	117	53	52	4	25	129	93	101
M00088	M00088: Ketone body biosynthesis, acetyl-CoA => acetoacetate/3-hydroxybutyrate/acetone	0	0	0	-1	-1	0	0	0	0	0	80	102	34	11	45	71	100	7	6	18	14	83	42	23	1	4	11	7	65	34	21
M00089	M00089: Triacylglycerol biosynthesis	0	0	0	0	-1	0	0	0	-1	-1	72	107	47	7	114	115	119	8	0	5	17	16	0	2	1	0	0	14	5	0	0
M00090	M00090: Phosphatidylcholine (PC) biosynthesis, choline => PC	0	0	0	0	0	-1	0	-1	0	-1	74	92	51	6	128	98	119	6	9	2	18	6	10	3	0	1	0	12	2	3	1
M00092	M00092: Phosphatidylethanolamine (PE) biosynthesis, ethanolamine => PE	0	0	0	-1	0	-1	0	0	0	0	82	91	52	16	98	51	76	2	5	1	8	21	45	31	0	0	0	3	3	12	13
M00094	M00094: Ceramide biosynthesis	0	0	0	0	-1	-1	0	0	-1	-1	66	109	52	4	118	114	123	14	0	1	21	16	0	0	1	0	0	12	5	0	0
M00095	M00095: C5 isoprenoid biosynthesis, mevalonate pathway	0	0	0	0	0	0	1	0	1	0	23	37	30	1	79	1	80	64	66	23	25	33	113	38	52	58	22	25	14	111	37
M00096	M00096: C5 isoprenoid biosynthesis, non-mevalonate pathway	0	0	0	1	1	0	1	1	1	1	0	0	25	0	0	0	0	87	109	28	26	136	115	123	86	109	17	26	136	115	123
M00097	M00097: beta-Carotene biosynthesis, GGAP => beta-carotene	0	0	0	0	0	-1	0	0	0	0	67	71	53	21	101	3	21	19	21	0	4	22	109	96	1	4	0	1	4	98	52
M00098	M00098: Acylglycerol degradation	0	0	0	0	0	0	1	1	1	1	9	9	42	0	0	0	0	74	95	7	26	135	115	123	46	73	1	25	132	115	123
M00099	M00099: Sphingosine biosynthesis	0	0	0	-1	-1	-1	0	-1	-1	-1	86	109	53	18	135	115	123	0	0	0	6	1	0	0	0	0	0	1	0	0	0
M00101	M00101: Cholesterol biosynthesis, FPP => cholesterol	0	0	0	-1	-1	-1	-1	-1	-1	-1	87	109	53	25	136	115	123	0	0	0	0	0	0	0	0	0	0	0	0	0	0
M00102	M00102: Ergocalciferol biosynthesis	0	0	0	0	-1	-1	0	-1	-1	-1	60	107	52	3	136	114	123	24	0	1	21	0	1	0	12	0	0	18	0	0	0
M00104	M00104: Bile acid biosynthesis, cholesterol => cholate	0	0	0	-1	-1	-1	-1	-1	-1	-1	87	109	53	26	136	115	123	0	0	0	0	0	0	0	0	0	0	0	0	0	0
M00105	M00105: Bile acid biosynthesis, cholesterol => chenodeoxycholate	0	0	0	-1	-1	-1	-1	-1	-1	-1	87	109	53	26	136	115	123	0	0	0	0	0	0	0	0	0	0	0	0	0	0
M00109	M00109: C21-Steroid hormone biosynthesis, progesterone => cortisol/cortisone	0	0	0	-1	-1	-1	-1	-1	-1	-1	87	109	53	26	136	115	123	0	0	0	0	0	0	0	0	0	0	0	0	0	0
M00110	M00110: C19/C18-Steroid hormone biosynthesis, pregnenolone => androstenedione => estrone	0	0	0	-1	-1	-1	-1	-1	-1	-1	87	109	53	26	136	115	123	0	0	0	0	0	0	0	0	0	0	0	0	0	0
M00112	M00112: Tocopherol biosynthesis	0	0	0	-1	-1	-1	-1	-1	-1	-1	87	108	53	26	136	115	123	0	1	0	0	0	0	0	0	0	0	0	0	0	0
M00115	M00115: NAD biosynthesis, aspartate => NAD	0	0	0	0	1	0	1	1	1	1	2	0	21	0	0	0	0	85	109	32	26	136	115	123	75	107	22	24	136	115	123
M00116	M00116: Menaquinone biosynthesis, chorismate => menaquinone	0	0	0	-1	-1	-1	-1	-1	-1	0	86	106	53	25	131	104	108	1	3	0	1	4	8	15	0	0	0	0	1	0	6
M00118	M00118: Glutathione biosynthesis, glutamate => glutathione	0	0	0	0	1	0	0	0	1	1	10	0	32	3	18	0	0	73	109	17	23	110	115	123	53	108	3	23	80	115	123
M00119	M00119: Pantothenate biosynthesis, valine/L-aspartate => pantothenate	0	0	0	1	1	0	1	1	1	1	4	1	23	0	0	0	0	83	108	27	26	136	115	123	82	108	13	26	136	115	123
M00121	M00121: Heme biosynthesis, glutamate => protoheme/siroheme	0	0	0	1	1	0	1	1	1	1	1	0	41	0	0	0	0	86	109	7	26	136	115	123	83	109	3	26	135	115	123
M00122	M00122: Cobalamin biosynthesis, cobinamide => cobalamin	0	0	0	0	0	-1	-1	-1	0	0	77	69	53	25	129	41	46	8	24	0	1	7	69	65	2	7	0	1	6	42	35
M00123	M00123: Biotin biosynthesis, pimeloyl-CoA => biotin	0	0	0	1	1	0	1	1	1	1	0	0	19	0	0	0	0	87	109	34	26	136	115	123	86	109	16	26	136	115	123
M00124	M00124: Pyridoxal biosynthesis, erythrose-4P => pyridoxal-5P	0	0	0	0	0	0	0	1	1	1	36	8	43	10	1	1	0	48	99	9	15	135	114	122	26	80	3	10	135	112	121
M00126	M00126: Tetrahydrofolate biosynthesis, GTP => THF	0	0	0	1	1	0	1	1	1	1	0	0	17	0	0	0	0	86	109	36	26	136	115	123	84	104	27	26	136	115	123
M00127	M00127: Thiamine biosynthesis, AIR => thiamine-P/thiamine-2P	0	0	0	1	1	0	1	1	1	1	0	0	24	0	0	0	0	87	109	25	26	136	115	123	82	109	12	26	136	115	123
M00128	M00128: Ubiquinone biosynthesis, eukaryotes, chorismate => ubiquinone	0	0	0	0	0	-1	0	0	0	0	65	74	53	9	99	2	84	18	14	0	14	25	112	30	3	1	0	12	4	103	9
M00129	M00129: Ascorbate biosynthesis, animals, glucose-1P => ascorbate	0	0	0	0	0	-1	0	-1	0	-1	78	76	51	13	128	14	115	7	23	1	10	3	99	7	1	5	0	0	0	86	2
M00130	M00130: Inositol phosphate metabolism, PI=> PIP2 => Ins(1,4,5)P3 => Ins(1,3,4,5)P4	0	0	0	-1	-1	-1	0	0	-1	-1	81	101	52	10	99	113	120	0	1	1	15	20	1	3	0	0	0	6	2	0	0
M00131	M00131: Inositol phosphate metabolism, Ins(1,3,4,5)P4 => Ins(1,3,4)P3 => myo-inositol	0	0	0	-1	-1	-1	-1	-1	-1	-1	87	109	53	26	133	114	123	0	0	0	0	1	0	0	0	0	0	0	0	0	0
M00133	M00133: Polyamine biosynthesis, arginine => agmatine => putrescine => spermidine	0	0	0	0	1	0	0	1	1	1	39	0	32	4	0	0	0	41	108	18	20	136	115	123	8	103	3	7	136	115	123
M00135	M00135: GABA biosynthesis, eukaryotes, putrescine => GABA	0	0	0	0	0	0	0	1	1	1	20	13	24	1	0	0	0	61	86	22	24	136	115	123	28	35	7	23	131	115	123
M00136	M00136: GABA biosynthesis, prokaryotes, putrescine => GABA	0	0	0	0	0	-1	-1	0	0	0	76	80	51	26	86	69	22	10	18	1	0	41	35	86	0	2	0	0	27	13	60
M00141	M00141: C1-unit interconversion, eukaryotes	0	0	0	0	0	0	1	1	1	1	10	2	0	0	0	0	0	72	104	46	26	136	115	123	36	87	17	26	136	115	123
M00143	M00143: Complex I (NADH dehydrogenase), NADH dehydrogenase (ubiquinone) Fe-S protein/flavoprotein	0	0	0	-1	-1	-1	0	-1	-1	-1	87	109	53	20	136	115	123	0	0	0	6	0	0	0	0	0	0	6	0	0	0
M00144	M00144: Complex I (NADH dehydrogenase), NADH dehydrogenase I	0	0	0	1	1	0	1	1	1	1	5	0	41	0	0	0	0	82	109	12	26	136	115	123	80	108	9	26	136	115	123
M00148	M00148: Complex II (succinate dehydrogenase / fumarate reductase), succinate dehydrogenase (ubiquinone)	0	0	0	0	-1	-1	0	0	-1	-1	65	105	51	4	107	113	115	21	3	2	21	26	1	8	10	0	1	20	13	0	7
M00149	M00149: Complex II (succinate dehydrogenase / fumarate reductase), succinate dehydrogenase	0	0	0	0	1	0	0	0	1	1	23	0	40	3	25	0	0	64	109	13	23	111	115	123	64	109	9	23	111	115	123
M00151	M00151: Complex III (Cytochrome bc1 complex)	0	0	0	0	1	0	1	0	1	1	6	3	44	0	53	0	0	81	106	9	26	72	115	123	78	105	3	26	28	115	123
M00152	M00152: Complex III (Cytochrome bc1 complex)	0	0	0	-1	-1	-1	-1	-1	-1	-1	87	109	53	25	136	114	123	0	0	0	0	0	0	0	0	0	0	0	0	0	0
M00154	M00154: Complex IV (Cytochrome c oxidase), cytochrome c oxidase	0	0	0	-1	-1	-1	-1	-1	-1	-1	87	109	53	26	136	115	123	0	0	0	0	0	0	0	0	0	0	0	0	0	0
M00155	M00155: Complex IV (Cytochrome c oxidase), cytochrome o ubiquinol oxidase/cytochrome c oxidase/quinol oxidase polypeptide	0	0	0	-1	-1	-1	-1	-1	-1	-1	87	109	53	26	136	115	123	0	0	0	0	0	0	0	0	0	0	0	0	0	0
M00159	M00159: V-type ATPase, prokaryotes	0	0	0	0	1	0	0	1	1	1	48	0	46	13	0	0	0	38	109	7	12	136	115	123	30	109	6	11	136	115	123
M00160	M00160: V-type ATPase, eukaryotes	0	0	0	-1	-1	-1	0	-1	-1	-1	80	109	52	9	136	115	123	5	0	1	17	0	0	0	3	0	0	13	0	0	0
M00165	M00165: Reductive pentose phosphate cycle (Calvin cycle)	0	0	0	-1	-1	-1	-1	0	-1	-1	86	102	53	26	118	106	121	1	3	0	0	13	4	1	0	0	0	0	3	0	0
M00166	M00166: Reductive pentose phosphate cycle, RuBP + CO2 => glyceraldehyde-3P	0	0	0	-1	-1	-1	-1	0	0	0	81	101	53	25	105	79	80	5	5	0	0	24	19	40	0	0	0	0	5	2	22
M00167	M00167: Reductive pentose phosphate cycle, glyceraldehyde-3P => RuBP	0	0	0	0	0	-1	-1	0	0	0	64	25	49	24	44	60	78	20	74	3	1	79	45	40	4	34	1	0	56	28	31
M00168	M00168: CAM (Crassulacean acid metabolism), dark	0	0	0	0	1	0	0	1	1	1	9	0	3	0	0	0	0	72	109	50	25	136	115	123	39	109	43	23	134	115	123
M00170	M00170: C4-dicarboxylic acid cycle, phosphoenolpyruvate carboxykinase type	0	0	0	0	1	0	0	1	1	1	9	0	4	4	0	0	0	73	109	49	19	135	115	123	36	109	42	13	134	115	123
M00171	M00171: C4-dicarboxylic acid cycle, NAD+ -malic enzyme type	0	0	0	0	0	0	0	0	0	0	53	17	44	15	21	2	6	25	75	7	6	108	108	113	2	17	2	2	80	75	91
M00173	M00173: Reductive citric acid cycle (Arnon-Buchanan cycle)	0	0	0	0	0	-1	0	0	0	0	70	85	53	22	95	85	19	13	16	0	2	33	28	102	1	5	0	0	19	23	88
M00174	M00174: Methane oxidation, methylotroph, methane => CO2	0	0	0	0	0	0	0	0	0	0	65	62	40	10	61	8	12	17	32	13	15	57	105	102	1	6	1	5	19	89	50
M00175	M00175: Nitrogen fixation, N2 => ammonia	0	0	0	0	1	0	0	1	1	1	51	0	24	19	0	0	0	29	109	28	4	136	115	123	12	106	22	3	136	115	123
M00176	M00176: Sulfur reduction, sulfate => H2S	0	0	0	0	0	-1	-1	0	0	0	73	91	52	26	23	41	47	11	6	1	0	105	63	61	1	2	0	0	68	24	31
M00177	M00177: Ribosome, eukaryotes	0	0	0	0	-1	-1	0	-1	-1	-1	78	109	53	6	136	115	123	9	0	0	20	0	0	0	7	0	0	19	0	0	0
M00179	M00179: Ribosome, archaea	0	0	0	-1	-1	-1	-1	-1	-1	-1	87	109	53	25	129	115	123	0	0	0	1	7	0	0	0	0	0	1	7	0	0
M00180	M00180: RNA polymerase II, eukaryotes	0	0	0	-1	-1	-1	0	-1	-1	-1	79	109	52	6	135	114	123	8	0	1	20	0	0	0	8	0	0	18	0	0	0
M00181	M00181: RNA polymerase III, eukaryotes	0	0	0	0	-1	-1	0	-1	-1	-1	69	108	52	2	134	114	123	17	0	1	24	1	1	0	9	0	0	21	0	0	0
M00184	M00184: RNA polymerase, archaea	0	0	0	-1	-1	-1	-1	-1	-1	-1	87	109	53	26	132	115	123	0	0	0	0	4	0	0	0	0	0	0	4	0	0
M00185	M00185: Sulfate transport system	0	0	0	0	1	0	0	1	1	1	34	0	27	5	0	0	0	51	109	22	18	136	115	123	18	109	7	11	136	115	123
M00189	M00189: Molybdate transport system	0	0	0	1	1	0	1	1	1	1	0	0	20	0	0	0	0	87	109	30	26	136	115	123	82	109	12	26	136	115	123
M00193	M00193: Putative spermidine/putrescine transport system	0	0	0	0	1	0	0	1	1	1	25	0	12	3	0	0	0	59	109	37	20	136	115	123	11	105	28	15	136	115	123
M00194	M00194: Maltose/maltodextrin transport system	0	0	0	0	1	1	1	1	1	1	10	0	0	0	0	0	0	77	109	53	26	136	115	123	75	109	53	26	136	115	123
M00199	M00199: Lactose/L-arabinose transport system	0	0	0	0	0	0	0	1	1	1	65	28	37	5	0	1	0	14	72	14	19	136	114	123	1	43	4	14	136	111	121
M00200	M00200: Sorbitol/mannitol transport system	0	0	0	0	0	0	0	0	0	0	78	64	40	11	9	28	2	8	17	10	11	120	78	117	0	0	1	7	86	37	99
M00201	M00201: alpha-Glucoside transport system	0	0	0	0	0	-1	0	0	0	0	68	56	52	7	3	8	12	11	33	0	16	129	98	90	0	0	0	13	106	44	42
M00203	M00203: Glucose/arabinose transport system	0	0	0	-1	-1	-1	-1	-1	-1	-1	87	109	53	26	134	115	123	0	0	0	0	1	0	0	0	0	0	0	0	0	0
M00204	M00204: Trehalose/maltose transport system	0	0	0	-1	0	-1	-1	0	0	0	81	90	52	24	52	9	100	3	5	1	2	67	100	8	0	0	0	0	32	86	1
M00206	M00206: Cellobiose transport system	0	0	0	0	0	-1	0	0	0	0	38	86	50	4	28	10	27	37	12	3	21	97	97	74	7	1	3	20	66	68	25
M00220	M00220: Rhamnose transport system	0	0	0	-1	-1	-1	-1	0	0	0	85	99	49	26	28	102	7	1	4	3	0	95	10	109	0	0	1	0	58	2	83
M00225	M00225: Lysine/arginine/ornithine transport system	0	0	0	0	0	0	-1	0	0	0	70	16	40	24	27	2	3	13	75	13	0	94	110	119	2	24	5	0	59	93	109
M00226	M00226: Histidine transport system	0	0	0	0	0	0	-1	0	0	0	73	20	41	26	27	2	3	11	73	12	0	93	112	117	1	19	3	0	58	102	103
M00230	M00230: Glutamate/aspartate transport system	0	0	0	0	0	0	0	1	0	0	72	10	8	21	1	5	6	13	81	45	3	133	101	110	0	34	38	0	124	62	52
M00231	M00231: Octopine/nopaline transport system	0	0	0	0	-1	-1	-1	-1	-1	-1	77	109	52	26	135	113	123	8	0	1	0	0	1	0	2	0	0	0	0	1	0
M00232	M00232: General L-amino acid transport system	0	0	0	0	0	0	0	1	1	1	59	18	25	8	0	0	0	20	88	27	16	134	115	123	2	45	7	8	133	115	123
M00233	M00233: Glutamate transport system	0	0	0	0	1	0	0	0	1	1	72	3	16	17	11	0	0	10	106	34	8	118	115	123	3	100	19	6	85	115	123
M00235	M00235: Arginine/ornithine transport system	0	0	0	-1	0	-1	-1	-1	0	0	79	83	50	26	131	17	64	5	10	3	0	3	82	44	0	0	0	0	1	50	3
M00237	M00237: Branched-chain amino acid transport system	0	0	0	0	1	0	0	1	1	1	12	0	9	5	0	0	0	72	109	43	19	136	115	123	35	109	27	17	136	115	123
M00245	M00245: Cobalt transport system	0	0	0	0	1	0	1	1	1	1	10	2	46	0	0	0	0	77	107	7	26	136	115	123	75	107	4	26	136	115	123
M00260	M00260: DNA polymerase III complex, bacteria	0	0	0	-1	-1	-1	-1	0	-1	-1	82	107	53	25	114	115	122	4	2	0	0	20	0	1	2	1	0	0	11	0	0
M00261	M00261: DNA polymerase alpha / primase complex	0	0	0	0	-1	-1	0	-1	-1	-1	58	106	51	2	132	110	123	26	1	2	24	3	3	0	13	0	0	20	2	0	0
M00262	M00262: DNA polymerase delta complex	0	0	0	0	-1	-1	0	-1	0	-1	72	108	53	5	131	100	123	14	0	0	21	4	5	0	9	0	0	18	1	0	0
M00263	M00263: DNA polymerase epsilon complex	0	0	0	0	-1	-1	0	-1	0	-1	67	101	51	2	127	73	115	17	0	2	21	6	26	3	1	0	0	15	0	4	0
M00277	M00277: PTS system, N-acetylgalactosamine-specific II component	0	0	0	0	0	0	0	1	1	1	71	6	26	16	0	0	0	16	102	27	10	135	115	123	8	88	14	8	133	114	123
M00278	M00278: PTS system, sorbose-specific II component	0	0	0	-1	0	-1	-1	0	0	0	87	95	51	26	104	48	61	0	6	2	0	25	55	59	0	0	1	0	14	44	38
M00284	M00284: Origin recognition complex	0	0	0	-1	-1	-1	-1	-1	-1	-1	87	108	52	25	136	113	123	0	1	1	1	0	2	0	0	0	0	1	0	1	0
M00285	M00285: MCM complex	0	0	0	0	-1	-1	0	-1	-1	-1	56	109	50	2	132	112	123	31	0	3	24	4	2	0	17	0	0	22	2	0	0
M00286	M00286: GINS complex	0	0	0	-1	-1	-1	0	-1	-1	-1	80	109	52	10	136	113	122	6	0	1	12	0	1	1	1	0	0	9	0	1	0
M00290	M00290: Holo-TFIIH complex	0	0	0	-1	-1	-1	0	-1	-1	-1	79	109	52	4	136	114	123	8	0	1	21	0	1	0	8	0	0	18	0	0	0
M00295	M00295: BRCA1-associated genome surveillance complex (BASC)	0	0	0	-1	-1	-1	-1	-1	-1	-1	87	109	53	26	136	115	123	0	0	0	0	0	0	0	0	0	0	0	0	0	0
M00296	M00296: BER complex	0	0	0	-1	-1	-1	-1	-1	0	-1	86	105	52	25	131	91	111	1	1	1	0	4	18	3	0	0	0	0	0	2	0
M00300	M00300: Putrescine transport system	0	0	0	0	1	0	0	1	1	1	40	0	34	8	0	0	0	38	109	17	17	136	115	123	6	103	8	11	136	115	123
M00301	M00301: Mannopine transport system	0	0	0	-1	-1	-1	-1	-1	-1	-1	87	109	53	26	136	115	123	0	0	0	0	0	0	0	0	0	0	0	0	0	0
M00302	M00302: 2-Aminoethylphosphonate transport system	0	0	0	-1	-1	-1	-1	-1	-1	-1	81	108	50	25	129	115	122	5	0	2	1	7	0	0	1	0	0	1	3	0	0
M00304	M00304: PTS system, fructose-specific II component	0	0	0	-1	0	-1	-1	-1	0	0	87	60	53	26	135	37	27	0	36	0	0	0	71	89	0	13	0	0	0	40	63
M00307	M00307: Pyruvate oxidation, pyruvate => acetyl-CoA	0	0	0	1	1	0	1	1	1	1	0	0	7	0	0	0	0	87	109	40	26	136	115	123	86	109	19	26	136	115	123
M00311	M00311: 2-oxoglutarate:ferredoxin oxidoreductase	0	0	0	0	1	0	0	1	1	1	40	3	43	9	0	4	0	46	106	10	17	136	111	123	33	100	8	16	136	110	123
M00319	M00319: Manganese/zinc/iron transport system	0	0	0	0	1	0	0	0	1	1	23	0	43	3	60	0	0	60	109	10	23	70	115	123	41	106	4	20	54	115	123
M00321	M00321: Bicarbonate transport system	0	0	0	-1	-1	-1	-1	-1	0	0	87	100	53	26	135	75	56	0	5	0	0	0	26	63	0	0	0	0	0	10	54
M00322	M00322: Neutral amino acid transport system	0	0	0	-1	-1	-1	-1	-1	-1	-1	87	109	53	26	136	115	123	0	0	0	0	0	0	0	0	0	0	0	0	0	0
M00323	M00323: Urea transport system	0	0	0	-1	-1	-1	-1	-1	-1	-1	87	108	53	26	127	115	123	0	0	0	0	5	0	0	0	0	0	0	2	0	0
M00324	M00324: Dipeptide transport system	0	0	0	0	1	0	0	1	1	1	20	0	23	0	0	0	0	60	109	26	25	136	115	123	26	109	11	22	136	115	123
M00331	M00331: Type II general secretion system	0	0	0	-1	-1	-1	-1	-1	-1	-1	87	109	53	26	130	115	123	0	0	0	0	6	0	0	0	0	0	0	5	0	0
M00332	M00332: Type III secretion system	0	0	0	-1	-1	-1	-1	-1	-1	-1	87	109	53	26	128	115	123	0	0	0	0	4	0	0	0	0	0	0	0	0	0
M00333	M00333: Type IV secretion system	0	0	0	-1	-1	-1	-1	-1	0	0	86	102	53	26	132	47	96	1	7	0	0	4	67	27	0	4	0	0	0	61	20
M00335	M00335: Sec (secretion) system	0	0	0	0	0	-1	0	0	0	0	74	72	50	19	74	24	59	13	37	3	7	62	91	64	13	37	1	6	62	91	64
M00337	M00337: Immunoproteasome	0	0	0	-1	-1	-1	-1	-1	-1	-1	87	109	53	26	136	115	123	0	0	0	0	0	0	0	0	0	0	0	0	0	0
M00340	M00340: Proteasome, 20S core particle	0	0	0	0	-1	-1	0	-1	-1	-1	68	109	52	3	133	115	123	17	0	1	23	2	0	0	10	0	0	21	1	0	0
M00341	M00341: Proteasome, 19S regulatory particle (PA700)	0	0	0	-1	-1	-1	0	-1	-1	-1	83	109	53	10	136	114	123	4	0	0	16	0	1	0	2	0	0	16	0	0	0
M00345	M00345: Formaldehyde assimilation, ribulose monophosphate pathway	0	0	0	0	0	0	1	0	0	0	12	62	47	0	15	94	17	73	35	6	26	117	13	96	64	8	3	26	80	8	52
M00346	M00346: Formaldehyde assimilation, serine pathway	0	0	0	-1	-1	-1	-1	-1	-1	0	87	103	53	26	133	109	30	0	2	0	0	1	4	81	0	0	0	0	0	0	45
M00348	M00348: Glutathione transport system	0	0	0	0	0	0	0	1	1	1	39	10	35	2	0	0	0	38	87	12	23	136	115	123	7	45	3	17	136	108	123
M00349	M00349: Microcin C transport system	0	0	0	0	0	0	0	0	1	1	39	1	32	7	1	0	0	38	105	19	13	133	115	123	6	94	5	6	121	115	123
M00351	M00351: Spliceosome, U1-snRNP	0	0	0	-1	-1	-1	0	-1	-1	-1	83	109	53	8	131	115	123	4	0	0	16	4	0	0	2	0	0	15	0	0	0
M00352	M00352: Spliceosome, U2-snRNP	0	0	0	-1	-1	-1	0	-1	-1	-1	80	109	53	6	130	115	123	6	0	0	19	3	0	0	1	0	0	16	2	0	0
M00353	M00353: Spliceosome, Prp19/CDC5L complex	0	0	0	0	-1	-1	0	-1	-1	-1	74	109	53	3	136	114	123	8	0	0	23	0	0	0	0	0	0	19	0	0	0
M00354	M00354: Spliceosome, U4/U6.U5 tri-snRNP	0	0	0	-1	-1	-1	0	-1	-1	-1	79	109	53	6	136	115	123	8	0	0	20	0	0	0	6	0	0	19	0	0	0
M00355	M00355: Spliceosome, 35S U5-snRNP	0	0	0	-1	-1	-1	0	-1	-1	-1	81	109	53	9	134	115	123	3	0	0	16	2	0	0	0	0	0	9	0	0	0
M00357	M00357: Methanogenesis, acetate => methane	0	0	0	-1	-1	-1	-1	-1	-1	-1	87	109	53	26	136	115	123	0	0	0	0	0	0	0	0	0	0	0	0	0	0
M00358	M00358: Coenzyme M biosynthesis	0	0	0	-1	-1	-1	-1	0	-1	-1	87	109	53	26	122	115	122	0	0	0	0	11	0	1	0	0	0	0	5	0	1
M00359	M00359: Aminoacyl-tRNA biosynthesis, eukaryotes	0	0	0	1	1	0	1	1	1	1	1	0	9	0	0	0	0	86	109	43	26	136	115	123	85	109	39	26	136	115	123
M00366	M00366: C10-C20 isoprenoid biosynthesis, plants	0	0	0	0	0	-1	0	0	0	0	76	77	50	4	18	34	22	9	14	3	20	106	66	92	6	1	2	20	81	32	70
