# Supplementary material for: Metabolic Reconstruction for Metagenomic Data and Its Application to the Human Microbiome
Source: PLoS Comput Biol. 2012 Jun 13;8(6):e1002358. doi: 10.1371/journal.pcbi.1002358 (PMC3374609; doi:10.1371/journal.pcbi.1002358)
Supplement: Table S7 — Modules and pathways differentially abundant in at least one body site as determined by LEfSe. We applied the LEfSe [23] biomarker discovery tool separately to functional module and pathway abundances from HUMAnN to determine those over- or under-enriched in at least one body site. Default statistical parameters of α = 0.05 and LDA score 2.0 were used. This table reports features found to be differential in at least one body site and the site at which they were most abundant. (XLSX) [file pcbi.1002358.s012.xlsx]

## Sheet: lefse_abundances
ID	Name	Site	Ave. abundance	LEfSe LDA score
M00222	Phosphate transport system	Posterior fornix	0.0603588	4.45496
M00194	Maltose/maltodextrin transport system	Posterior fornix	0.054228	4.40902
M00197	Putative sugar transport system	Posterior fornix	0.0538927	4.39964
M00276	PTS system, mannose-specific II component	Posterior fornix	0.0441828	4.32835
M00183	RNA polymerase, bacteria	Posterior fornix	0.0516355	4.31677
ko00473	D-Alanine metabolism	Posterior fornix	0.0550047	4.28875
M00299	Spermidine/putrescine transport system	Posterior fornix	0.0400382	4.27001
M00239	Peptides/nickel transport system	Posterior fornix	0.0364217	4.20295
M00006	Pentose phosphate pathway, oxidative phase, glucose 6P => ribulose 5P	Posterior fornix	0.045017	4.19441
M00207	Multiple sugar transport system	Posterior fornix	0.0319503	4.17775
M00048	Inosine monophosphate biosynthesis, PRPP + glutamine => IMP	Buccal mucosa	0.0308477	4.14243
M00360	Aminoacyl-tRNA biosynthesis, prokaryotes	Posterior fornix	0.0477612	4.12966
M00178	Ribosome, bacteria	Posterior fornix	0.0541169	4.12555
M00003	Gluconeogenesis, oxaloacetate => fructose-6P	Stool	0.0309533	4.12004
M00359	Aminoacyl-tRNA biosynthesis, eukaryotes	Stool	0.0321376	4.1025
M00021	Cysteine biosynthesis, serine => cysteine	Buccal mucosa	0.0262015	4.08337
M00115	NAD biosynthesis, aspartate => NAD	Stool	0.0251439	4.07022
ko00785	Lipoic acid metabolism	Retroauricular crease	0.0246832	4.06645
M00010	Citrate cycle, first carbon oxidation	Retroauricular crease	0.0237046	4.06499
M00149	Complex II (succinate dehydrogenase / fumarate reductase), succinate dehydrogenase	Retroauricular crease	0.0232457	4.06345
M00123	Biotin biosynthesis, pimeloyl-CoA => biotin	Retroauricular crease	0.0234154	4.06239
M00311	2-oxoglutarate:ferredoxin oxidoreductase	Stool	0.0236035	4.06155
ko02060	Phosphotransferase system (PTS)	Posterior fornix	0.0242636	4.05195
M00023	Tryptophan biosynthesis, chorismate => tryptophan	Buccal mucosa	0.0229154	4.04925
M00120	Coenzyme A biosynthesis, pantothenate => CoA	Posterior fornix	0.0382333	4.03534
M00051	Uridine monophosphate biosynthesis, glutamine (+ PRPP) => UMP	Stool	0.0259558	4.03407
M00002	Glycolysis, core module involving three-carbon compounds	Posterior fornix	0.0465068	4.03206
M00245	Cobalt transport system	Retroauricular crease	0.0203889	4.01991
M00083	Fatty acid biosynthesis, elongation	Stool	0.0274035	4.01927
M00096	C5 isoprenoid biosynthesis, non-mevalonate pathway	Retroauricular crease	0.0217776	4.0135
ko00660	C5-Branched dibasic acid metabolism	Buccal mucosa	0.0218253	4.00837
M00015	Proline biosynthesis, glutamate => proline	Stool	0.022625	4.00789
M00164	ATP synthase	Posterior fornix	0.0414385	3.99655
M00157	F-type ATPase, bacteria	Posterior fornix	0.0414385	3.99655
M00121	Heme biosynthesis, glutamate => protoheme/siroheme	Retroauricular crease	0.0194614	3.99558
M00053	Pyrimidine deoxyribonuleotide biosynthesis, CDP/CTP => dCDP/dCTP,dTDP/dTTP	Supragingival plaque	0.0224975	3.99319
M00151	Complex III (Cytochrome bc1 complex)	Retroauricular crease	0.0188094	3.97895
M00007	Pentose phosphate pathway, non-oxidative phase, fructose 6P => ribose 5P	Stool	0.0260852	3.97305
M00060	Lipopolysaccharide biosynthesis, KDO2-lipid A	Stool	0.0187685	3.96759
M00119	Pantothenate biosynthesis, valine/L-aspartate => pantothenate	Stool	0.0193872	3.96516
M00022	Shikimate pathway, phosphoenolpyruvate + erythrose-4P => chorismate	Buccal mucosa	0.0203743	3.95671
M00307	Pyruvate oxidation, pyruvate => acetyl-CoA	Retroauricular crease	0.0185366	3.95452
ko00471	D-Glutamine and D-glutamate metabolism	Posterior fornix	0.0423376	3.95128
ko00780	Biotin metabolism	Retroauricular crease	0.0231356	3.9465
M00061	Uronic acid metabolism	Stool	0.0169703	3.93708
M00045	Histidine degradation, histidine => N-formiminoglutamate => glutamate	Stool	0.0166393	3.92681
M00126	Tetrahydrofolate biosynthesis, GTP => THF	Stool	0.0198999	3.9201
ko00290	Valine, leucine and isoleucine biosynthesis	Buccal mucosa	0.0293894	3.91199
ko00540	Lipopolysaccharide biosynthesis	Tongue dorsum	0.0173278	3.91179
M00019	Leucine biosynthesis, pyruvate => 2-oxoisovalerate => leucine	Buccal mucosa	0.0160804	3.90888
ko03010	Ribosome	Posterior fornix	0.038193	3.90326
M00017	Methionine biosynthesis, apartate => homoserine => methionine	Buccal mucosa	0.0166719	3.88942
M00011	Citrate cycle, second carbon oxidation	Supragingival plaque	0.0151008	3.87872
M00097	beta-Carotene biosynthesis, GGAP => beta-carotene	Supragingival plaque	0.000253444	3.87213
ko03430	Mismatch repair	Posterior fornix	0.0278895	3.86186
ko00970	Aminoacyl-tRNA biosynthesis	Posterior fornix	0.0349111	3.8503
M00125	Riboflavin biosynthesis, GTP => riboflavin/FMN/FAD	Posterior fornix	0.0266671	3.84547
M00028	Ornithine biosynthesis, glutamate => ornithine	Anterior nares	0.0141865	3.84293
ko00072	Synthesis and degradation of ketone bodies	Posterior fornix	0.0143933	3.82702
M00001	Glycolysis (Embden-Meyerhof pathway), glucose => pyruvate	Posterior fornix	0.0357023	3.82356
ko00340	Histidine metabolism	Stool	0.0175475	3.82221
M00009	Citrate cycle (TCA cycle, Krebs cycle)	Supragingival plaque	0.0129422	3.8103
M00004	Pentose phosphate pathway (Pentose phosphate cycle)	Retroauricular crease	0.0208917	3.80328
M00049	Adenine nucleotide biosynthesis, IMP => ADP/dADP,ATP/dATP	Posterior fornix	0.0322957	3.80303
M00127	Thiamine biosynthesis, AIR => thiamine-P/thiamine-2P	Anterior nares	0.0135276	3.79803
ko00860	Porphyrin and chlorophyll metabolism	Retroauricular crease	0.0130954	3.79714
M00026	Histidine biosynthesis, PRPP => histidine	Stool	0.012173	3.79671
M00050	Guanine nucleotide biosynthesis, IMP => GDP/dGDP,GTP/dGTP	Posterior fornix	0.0315986	3.79163
M00124	Pyridoxal biosynthesis, erythrose-4P => pyridoxal-5P	Stool	0.0124307	3.79115
ko00400	Phenylalanine, tyrosine and tryptophan biosynthesis	Buccal mucosa	0.0150243	3.79047
M00170	C4-dicarboxylic acid cycle, phosphoenolpyruvate carboxykinase type	Posterior fornix	0.0125321	3.78428
M00064	ADP-L-glycero-D-manno-heptose biosynthesis	Tongue dorsum	0.0123297	3.78426
ko00061	Fatty acid biosynthesis	Buccal mucosa	0.0214769	3.7666
M00018	Threonine biosynthesis, apartate => homoserine => threonine	Anterior nares	0.023321	3.76649
ko00550	Peptidoglycan biosynthesis	Posterior fornix	0.0297298	3.76577
M00052	Pyrimidine ribonucleotide biosynthesis, UMP => UDP/UTP,CDP/CTP	Buccal mucosa	0.0251714	3.76413
M00237	Branched-chain amino acid transport system	Buccal mucosa	0.0119341	3.76358
M00168	CAM (Crassulacean acid metabolism), dark	Supragingival plaque	0.0119011	3.75896
M00336	Twin-arginine translocation (Tat) system	Supragingival plaque	0.0112536	3.75112
M00189	Molybdate transport system	Retroauricular crease	0.0112849	3.74651
ko00750	Vitamin B6 metabolism	Stool	0.01721	3.74514
ko00511	Other glycan degradation	Retroauricular crease	0.014736	3.71161
M00246	Nickel transport system	Tongue dorsum	0.00990841	3.70472
ko00020	Citrate cycle (TCA cycle)	Retroauricular crease	0.0172832	3.70061
ko00052	Galactose metabolism	Posterior fornix	0.0177017	3.69678
ko00790	Folate biosynthesis	Buccal mucosa	0.0180454	3.68699
M00008	Entner-Doudoroff pathway, glucose-6P => glyceraldehyde-3P + pyruvate	Stool	0.011037	3.67601
ko00040	Pentose and glucuronate interconversions	Stool	0.0129407	3.66975
ko03440	Homologous recombination	Posterior fornix	0.02556	3.66874
ko00521	Streptomycin biosynthesis	Stool	0.0188746	3.66829
M00035	Methionine degradation	Stool	0.0114089	3.66209
ko00051	Fructose and mannose metabolism	Posterior fornix	0.0204245	3.65444
ko00720	Carbon fixation pathways in prokaryotes	Stool	0.0151776	3.65088
M00016	Lysine biosynthesis, aspartate => lysine	Tongue dorsum	0.0133268	3.64694
ko03030	DNA replication	Posterior fornix	0.0219146	3.63887
M00335	Sec (secretion) system	Supragingival plaque	0.0079792	3.59573
ko00030	Pentose phosphate pathway	Posterior fornix	0.0247271	3.59435
M00024	Phenylalanine biosynthesis, chorismate => phenylalanine	Tongue dorsum	0.00840208	3.58045
M00172	C4-dicarboxylic acid cycle, NADP+ -malic enzyme type	Tongue dorsum	0.00760665	3.57025
M00012	Glyoxylate cycle	Anterior nares	0.00736212	3.56819
ko00450	Selenocompound metabolism	Tongue dorsum	0.0152679	3.56431
ko00260	Glycine, serine and threonine metabolism	Retroauricular crease	0.0139803	3.55818
ko00920	Sulfur metabolism	Supragingival plaque	0.010214	3.55807
M00025	Tyrosine biosynthesis, chorismate => tyrosine	Tongue dorsum	0.00786999	3.55445
ko00240	Pyrimidine metabolism	Posterior fornix	0.0211499	3.5504
ko00010	Glycolysis / Gluconeogenesis	Posterior fornix	0.0194498	3.542
ko00520	Amino sugar and nucleotide sugar metabolism	Posterior fornix	0.0191063	3.52765
ko00250	Alanine, aspartate and glutamate metabolism	Stool	0.0230094	3.52688
ko00730	Thiamine metabolism	Posterior fornix	0.020644	3.52287
ko00500	Starch and sucrose metabolism	Posterior fornix	0.0154463	3.51903
M00029	Urea cycle	Stool	0.0063953	3.51013
M00176	Sulfur reduction, sulfate => H2S	Stool	0.000161759	3.50639
M00319	Manganese/zinc/iron transport system	Tongue dorsum	0.00635215	3.50512
M00345	Formaldehyde assimilation, ribulose monophosphate pathway	Anterior nares	0.00623922	3.50432
ko00623	Toluene degradation	Supragingival plaque	0.00616546	3.48927
ko00670	One carbon pool by folate	Stool	0.0230177	3.4875
M00193	Putative spermidine/putrescine transport system	Posterior fornix	0.00612385	3.48635
M00364	C10-C20 isoprenoid biosynthesis, bacteria	Buccal mucosa	0.00864403	3.48583
M00361	Nucleotide sugar biosynthesis, eukaryotes	Stool	0.00368152	3.48212
M00150	Complex II (succinate dehydrogenase / fumarate reductase), fumarate reductase	Buccal mucosa	0.00607669	3.47796
ko00770	Pantothenate and CoA biosynthesis	Tongue dorsum	0.0199689	3.45852
ko00460	Cyanoamino acid metabolism	Stool	0.00898338	3.45556
ko04120	Ubiquitin mediated proteolysis	Anterior nares	0.00551523	3.4521
ko00330	Arginine and proline metabolism	Stool	0.00990216	3.45001
ko00190	Oxidative phosphorylation	Retroauricular crease	0.00984183	3.4423
ko00130	Ubiquinone and other terpenoid-quinone biosynthesis	Retroauricular crease	0.00824038	3.4377
M00342	Bacterial proteasome	Anterior nares	0.00507264	3.42251
M00133	Polyamine biosynthesis, arginine => agmatine => putrescine => spermidine	Supragingival plaque	0.00411726	3.4169
ko00270	Cysteine and methionine metabolism	Tongue dorsum	0.0153876	3.41333
M00175	Nitrogen fixation, N2 => ammonia	Buccal mucosa	0.00215085	3.4111
ko02010	ABC transporters	Posterior fornix	0.00917872	3.40203
ko00561	Glycerolipid metabolism	Posterior fornix	0.00830405	3.3992
ko00410	beta-Alanine metabolism	Stool	0.00595092	3.39464
ko00480	Glutathione metabolism	Posterior fornix	0.00996824	3.3935
ko04122	Sulfur relay system	Anterior nares	0.012925	3.38894
M00027	GABA (gamma-Aminobutyrate) shunt	Retroauricular crease	0.00233356	3.3835
ko00230	Purine metabolism	Posterior fornix	0.0154305	3.3824
M00198	sn-Glycerol 3-phosphate transport system	Retroauricular crease	0.00530958	3.38182
M00324	Dipeptide transport system	Buccal mucosa	0.0047578	3.37144
M00229	Arginine transport system	Buccal mucosa	0.0046966	3.36644
ko00430	Taurine and hypotaurine metabolism	Stool	0.0110811	3.36396
M00159	V-type ATPase, prokaryotes	Stool	0.00509733	3.36176
ko03420	Nucleotide excision repair	Posterior fornix	0.012969	3.34824
ko00630	Glyoxylate and dicarboxylate metabolism	Stool	0.00772085	3.34545
ko03410	Base excision repair	Posterior fornix	0.0159199	3.34018
ko04112	Cell cycle - Caulobacter	Posterior fornix	0.0130011	3.3282
M00156	Complex IV (Cytochrome c oxidase), cytochrome c oxidase, cbb3-type	Supragingival plaque	0.0042003	3.32223
ko00562	Inositol phosphate metabolism	Retroauricular crease	0.00626496	3.31899
ko03060	Protein export	Posterior fornix	0.0201837	3.31718
M00185	Sulfate transport system	Supragingival plaque	0.00420801	3.31655
M00270	PTS system, trehalose-specific II component	Supragingival plaque	0.00487418	3.31525
ko00900	Terpenoid backbone biosynthesis	Posterior fornix	0.0179948	3.31197
ko00621	Dioxin degradation	Buccal mucosa	0.00422613	3.30613
ko00531	Glycosaminoglycan degradation	Stool	0.00383199	3.27826
M00046	beta-Alanine biosynthesis, cytosine / uracil => beta-alanine	Stool	0.00031476	3.27388
ko03020	RNA polymerase	Posterior fornix	0.0101681	3.26745
M00118	Glutathione biosynthesis, glutamate => glutathione	Supragingival plaque	0.00375585	3.26599
M00098	Acylglycerol degradation	Retroauricular crease	0.00358557	3.2561
ko00625	Chloroalkane and chloroalkene degradation	Buccal mucosa	0.00631957	3.25448
ko00620	Pyruvate metabolism	Buccal mucosa	0.0145959	3.24621
ko00626	Naphthalene degradation	Buccal mucosa	0.00668607	3.23425
M00287	PTS system, galactosamine-specific II component	Posterior fornix	0.00441384	3.2288
ko00300	Lysine biosynthesis	Stool	0.018312	3.22543
M00362	Nucleotide sugar biosynthesis, prokaryotes	Stool	0.000867675	3.20816
ko00903	Limonene and pinene degradation	Anterior nares	0.00375063	3.19348
ko00053	Ascorbate and aldarate metabolism	Retroauricular crease	0.0049966	3.19077
ko00564	Glycerophospholipid metabolism	Buccal mucosa	0.00855996	3.1884
ko00281	Geraniol degradation	Anterior nares	0.00324148	3.18724
M00295	BRCA1-associated genome surveillance complex (BASC)	Supragingival plaque	0	3.17706
ko00910	Nitrogen metabolism	Tongue dorsum	0.00833046	3.17239
ko05150	Staphylococcus aureus infection	Posterior fornix	0.00311907	3.17148
ko00740	Riboflavin metabolism	Posterior fornix	0.0104826	3.16851
ko00908	Zeatin biosynthesis	Posterior fornix	0.00924218	3.16499
ko00600	Sphingolipid metabolism	Stool	0.00394986	3.15731
ko00280	Valine, leucine and isoleucine degradation	Anterior nares	0.00573328	3.14833
M00300	Putrescine transport system	Tongue dorsum	0.00278058	3.13086
ko00930	Caprolactam degradation	Retroauricular crease	0.00271773	3.12965
M00141	C1-unit interconversion, eukaryotes	Retroauricular crease	0.00293066	3.11758
ko00360	Phenylalanine metabolism	Stool	0.00374663	3.11553
ko00440	Phosphonate and phosphinate metabolism	Stool	0.00321084	3.11191
ko00633	Nitrotoluene degradation	Tongue dorsum	0.00267644	3.11032
M00077	Chondroitin sulfate degradation	Stool	0.00257968	3.10793
ko03050	Proteasome	Retroauricular crease	0.00252045	3.10354
M00079	Keratan sulfate degradation	Stool	0.00252225	3.0982
ko00760	Nicotinate and nicotinamide metabolism	Stool	0.0134105	3.09342
M00233	Glutamate transport system	Posterior fornix	0.00259573	3.08969
M00142	Complex I (NADH dehydrogenase), NADH dehydrogenase I	Retroauricular crease	0.00236529	3.06743
M00310	Pyruvate:ferredoxin oxidoreductase	Anterior nares	0.00210177	3.06109
ko00362	Benzoate degradation	Posterior fornix	0.00351795	3.05519
M00135	GABA biosynthesis, eukaryotes, putrescine => GABA	Retroauricular crease	0.00119725	3.05056
M00087	beta-Oxidation	Anterior nares	0.00224303	3.0153
ko00380	Tryptophan metabolism	Retroauricular crease	0.00387346	3.01247
ko03070	Bacterial secretion system	Supragingival plaque	0.0107735	3.00918
M00349	Microcin C transport system	Supragingival plaque	0.00177045	2.98472
ko00310	Lysine degradation	Anterior nares	0.00369217	2.98078
ko04270	Vascular smooth muscle contraction	Supragingival plaque	1.28197e-05	2.97756
ko00363	Bisphenol degradation	Anterior nares	0.00186841	2.97733
ko04260	Cardiac muscle contraction	Retroauricular crease	2.30121e-05	2.97714
ko00680	Methane metabolism	Stool	0.00609991	2.97486
M00044	Tyrosine degradation, tyrosine => homogentisate	Anterior nares	0	2.97239
ko00312	beta-Lactam resistance	Anterior nares	0.00175043	2.93023
ko02040	Flagellar assembly	Stool	0.00181379	2.92995
ko02030	Bacterial chemotaxis	Stool	0.0042168	2.91564
M00136	GABA biosynthesis, prokaryotes, putrescine => GABA	Tongue dorsum	5.47702e-05	2.9132
ko00627	Aminobenzoate degradation	Posterior fornix	0.00331871	2.90912
ko01053	Biosynthesis of siderophore group nonribosomal peptides	Buccal mucosa	0.0015898	2.88199
ko00071	Fatty acid metabolism	Anterior nares	0.0041362	2.88197
ko01040	Biosynthesis of unsaturated fatty acids	Anterior nares	0.00278297	2.87648
M00290	Holo-TFIIH complex	Retroauricular crease	0.000633108	2.87547
ko00650	Butanoate metabolism	Anterior nares	0.0083875	2.8751
ko03018	RNA degradation	Supragingival plaque	0.00915988	2.87031
ko00640	Propanoate metabolism	Anterior nares	0.00766091	2.84766
ko00311	Penicillin and cephalosporin biosynthesis	Buccal mucosa	0.00197563	2.84149
M00317	Manganese/iron transport system	Supragingival plaque	0.00115093	2.83682
ko00590	Arachidonic acid metabolism	Buccal mucosa	0.00145911	2.83042
ko04146	Peroxisome	Anterior nares	0.00137134	2.82784
M00199	Lactose/L-arabinose transport system	Stool	0.001364	2.82536
M00296	BER complex	Supragingival plaque	1.18183e-05	2.81043
ko04210	Apoptosis	Posterior fornix	0.00126532	2.80286
ko00624	Polycyclic aromatic hydrocarbon degradation	Buccal mucosa	0.00279624	2.78697
M00230	Glutamate/aspartate transport system	Posterior fornix	0.0011468	2.78259
ko00350	Tyrosine metabolism	Buccal mucosa	0.00541663	2.78241
ko02020	Two-component system	Posterior fornix	0.00411748	2.78066
M00117	Ubiquinone biosynthesis, prokaryotes, chorismate => ubiquinone	Supragingival plaque	0.00122189	2.77715
ko00140	Steroid hormone biosynthesis	Stool	0.00118021	2.76392
M00076	Dermatan sulfate degradation	Stool	0.0011467	2.75645
ko03040	Spliceosome	Retroauricular crease	0.00116369	2.73801
M00277	PTS system, N-acetylgalactosamine-specific II component	Posterior fornix	0.00174011	2.72803
ko04930	Type II diabetes mellitus	Retroauricular crease	3.56935e-05	2.72041
ko04940	Type I diabetes mellitus	Retroauricular crease	6.71909e-06	2.71809
ko05120	Epithelial cell signaling in Helicobacter pylori infection	Tongue dorsum	0.00112663	2.71794
ko04950	Maturity onset diabetes of the young	Supragingival plaque	6.12442e-05	2.71702
M00206	Cellobiose transport system	Retroauricular crease	0.000950635	2.70927
ko03008	Ribosome biogenesis in eukaryotes	Retroauricular crease	0.00173391	2.70562
M00285	MCM complex	Retroauricular crease	0.000996994	2.69772
M00340	Proteasome, 20S core particle	Retroauricular crease	0.000950132	2.69483
ko04966	Collecting duct acid secretion	Retroauricular crease	0.000808961	2.68535
M00072	Oligosaccharyltransferase	Retroauricular crease	0.00054968	2.68106
ko04974	Protein digestion and absorption	Stool	0.000883663	2.67731
ko03022	Basal transcription factors	Retroauricular crease	0.000894796	2.67337
M00366	C10-C20 isoprenoid biosynthesis, plants	Retroauricular crease	0.000968005	2.66757
ko00565	Ether lipid metabolism	Buccal mucosa	0.000919539	2.66084
M00032	Lysine degradation, lysine => saccharopine => acetoacetyl-CoA	Retroauricular crease	0.000680453	2.6599
ko00510	N-Glycan biosynthesis	Stool	0.0011971	2.6422
M00177	Ribosome, eukaryotes	Retroauricular crease	0.000864491	2.63744
M00180	RNA polymerase II, eukaryotes	Retroauricular crease	0.000857995	2.63635
ko00592	alpha-Linolenic acid metabolism	Anterior nares	0.000880403	2.63438
M00181	RNA polymerase III, eukaryotes	Retroauricular crease	0.00082281	2.61367
M00341	Proteasome, 19S regulatory particle (PA700)	Retroauricular crease	0.000747751	2.60684
M00202	Oligogalacturonide transport system	Stool	0.000671551	2.59693
M00261	DNA polymerase alpha / primase complex	Retroauricular crease	0.000784284	2.59664
M00354	Spliceosome, U4/U6.U5 tri-snRNP	Retroauricular crease	0.000720211	2.59045
ko04512	ECM-receptor interaction	Retroauricular crease	7.16188e-05	2.59001
ko00100	Steroid biosynthesis	Retroauricular crease	0.000728453	2.58289
M00148	Complex II (succinate dehydrogenase / fumarate reductase), succinate dehydrogenase (ubiquinone)	Retroauricular crease	0.000772943	2.58175
ko04060	Cytokine-cytokine receptor interaction	Stool	1.23729e-05	2.57312
ko04514	Cell adhesion molecules (CAMs)	Supragingival plaque	2.55278e-05	2.57022
ko04080	Neuroactive ligand-receptor interaction	Retroauricular crease	4.03504e-05	2.56938
M00348	Glutathione transport system	Stool	0.000480959	2.55663
ko00643	Styrene degradation	Supragingival plaque	0.00069664	2.5357
ko00563	Glycosylphosphatidylinositol(GPI)-anchor biosynthesis	Retroauricular crease	0.000657371	2.52266
M00030	Lysine biosynthesis, 2-oxoglutarate => 2-aminoadipate => lysine	Retroauricular crease	0.000437614	2.51852
ko00983	Drug metabolism - other enzymes	Anterior nares	0.000648381	2.49906
M00102	Ergocalciferol biosynthesis	Retroauricular crease	0.000583563	2.49665
ko00361	Chlorocyclohexane and chlorobenzene degradation	Anterior nares	0.000586332	2.47752
M00351	Spliceosome, U1-snRNP	Retroauricular crease	0.000531557	2.46748
M00055	N-glycan precursor biosynthesis	Retroauricular crease	0.000585558	2.46709
ko03015	mRNA surveillance pathway	Retroauricular crease	0.000581789	2.46571
ko04530	Tight junction	Anterior nares	0.000241614	2.45955
M00262	DNA polymerase delta complex	Retroauricular crease	0.00056969	2.45667
M00014	Glucuronate pathway (uronate pathway)	Supragingival plaque	0.000100493	2.42914
M00173	Reductive citric acid cycle (Arnon-Buchanan cycle)	Tongue dorsum	0.00053099	2.42
M00353	Spliceosome, Prp19/CDC5L complex	Retroauricular crease	0.000470883	2.4187
ko04910	Insulin signaling pathway	Stool	0.000327481	2.41861
ko03013	RNA transport	Posterior fornix	0.00107068	2.41303
M00036	Leucine degradation, leucine => acetoacetate + acetyl-CoA	Supragingival plaque	0.000318805	2.41208
ko04621	NOD-like receptor signaling pathway	Posterior fornix	0.000281632	2.40909
M00352	Spliceosome, U2-snRNP	Retroauricular crease	0.000457869	2.40338
M00232	General L-amino acid transport system	Supragingival plaque	0.000572711	2.40279
ko04144	Endocytosis	Retroauricular crease	0.000446017	2.39414
ko04140	Regulation of autophagy	Retroauricular crease	0.000474182	2.38718
ko04320	Dorso-ventral axis formation	Anterior nares	0.000123583	2.38456
ko04145	Phagosome	Retroauricular crease	0.00040717	2.37719
ko04113	Meiosis - yeast	Retroauricular crease	0.000416214	2.3764
M00160	V-type ATPase, eukaryotes	Retroauricular crease	0.000465278	2.36799
ko04150	mTOR signaling pathway	Retroauricular crease	0.000446783	2.36616
ko00906	Carotenoid biosynthesis	Anterior nares	0.000516548	2.36409
M00013	Malonate semialdehyde pathway, propanoyl-CoA => Acetyl-CoA	Anterior nares	0	2.36334
ko05110	Vibrio cholerae infection	Retroauricular crease	0.000431397	2.36263
ko04141	Protein processing in endoplasmic reticulum	Stool	0.000483558	2.3538
ko04626	Plant-pathogen interaction	Tongue dorsum	0.00137406	2.33521
M00219	AI-2 transport system	Supragingival plaque	0.00031379	2.32748
ko04962	Vasopressin-regulated water reabsorption	Retroauricular crease	0.000313145	2.31867
ko04520	Adherens junction	Retroauricular crease	9.25843e-05	2.31774
ko00791	Atrazine degradation	Anterior nares	0.00110693	2.31723
ko04360	Axon guidance	Retroauricular crease	2.47419e-05	2.30975
ko03450	Non-homologous end-joining	Retroauricular crease	0.000379335	2.30614
M00312	2-oxoisovalerate:ferredoxin oxidoreductase	Stool	0.000300652	2.3016
ko04380	Osteoclast differentiation	Supragingival plaque	9.03525e-06	2.30032
M00031	Lysine biosynthesis, archaea, 2-aminoadipate => lysine	Stool	5.59902e-05	2.29347
ko05111	Vibrio cholerae pathogenic cycle	Stool	0.000417818	2.29293
ko04510	Focal adhesion	Supragingival plaque	3.95536e-05	2.2875
ko04540	Gap junction	Retroauricular crease	2.81958e-06	2.28557
ko04964	Proximal tubule bicarbonate reclamation	Retroauricular crease	0.00025873	2.27722
ko04130	SNARE interactions in vesicular transport	Retroauricular crease	0.000363551	2.27693
M00042	Catecholamine biosynthesis, tyrosine => dopamine => noradrenaline => adrenaline	Retroauricular crease	0	2.27388
M00167	Reductive pentose phosphate cycle, glyceraldehyde-3P => RuBP	Anterior nares	0.000374574	2.24709
M00355	Spliceosome, 35S U5-snRNP	Retroauricular crease	0.000305793	2.24269
ko04744	Phototransduction	Retroauricular crease	8.74674e-05	2.24058
ko04142	Lysosome	Retroauricular crease	0.000296221	2.23723
ko04011	MAPK signaling pathway - yeast	Retroauricular crease	0.000350645	2.23254
ko00710	Carbon fixation in photosynthetic organisms	Posterior fornix	0.000309785	2.21112
ko05100	Bacterial invasion of epithelial cells	Retroauricular crease	0.000312214	2.19987
ko04742	Taste transduction	Anterior nares	1.47308e-05	2.1963
ko04740	Olfactory transduction	Anterior nares	1.51626e-05	2.19171
ko05143	African trypanosomiasis	Anterior nares	0.000304485	2.18643
M00174	Methane oxidation, methylotroph, methane => CO2	Supragingival plaque	0.000349038	2.18642
ko04745	Phototransduction - fly	Retroauricular crease	1.24528e-05	2.1845
ko05323	Rheumatoid arthritis	Retroauricular crease	0.000286655	2.18334
M00129	Ascorbate biosynthesis, animals, glucose-1P => ascorbate	Supragingival plaque	0.000296673	2.17879
ko04650	Natural killer cell mediated cytotoxicity	Retroauricular crease	0.000111259	2.1678
ko00941	Flavonoid biosynthesis	Supragingival plaque	0.000292158	2.16142
M00034	Methionine salvage pathway	Retroauricular crease	7.94283e-05	2.15973
M00334	Type VI secretion system	Supragingival plaque	0.000283718	2.15677
M00203	Glucose/arabinose transport system	Stool	0	2.15541
M00128	Ubiquinone biosynthesis, eukaryotes, chorismate => ubiquinone	Retroauricular crease	0.000253526	2.15357
M00094	Ceramide biosynthesis	Retroauricular crease	0.000283098	2.15034
ko04111	Cell cycle - yeast	Retroauricular crease	0.000213451	2.14955
ko04622	RIG-I-like receptor signaling pathway	Retroauricular crease	0.000102038	2.14484
ko05142	Chagas disease (American trypanosomiasis)	Supragingival plaque	0.000272389	2.13575
ko04722	Neurotrophin signaling pathway	Supragingival plaque	6.00305e-06	2.13293
ko04612	Antigen processing and presentation	Retroauricular crease	8.07423e-05	2.1324
ko04720	Long-term potentiation	Supragingival plaque	0	2.13087
ko04730	Long-term depression	Anterior nares	0	2.12977
ko04914	Progesterone-mediated oocyte maturation	Retroauricular crease	9.94361e-05	2.12265
M00122	Cobalamin biosynthesis, cobinamide => cobalamin	Supragingival plaque	0.000255677	2.12068
ko04712	Circadian rhythm - plant	Retroauricular crease	0.000208635	2.1195
ko04610	Complement and coagulation cascades	Anterior nares	1.52288e-05	2.11658
ko04660	T cell receptor signaling pathway	Supragingival plaque	3.99346e-06	2.11425
ko04623	Cytosolic DNA-sensing pathway	Supragingival plaque	3.60247e-05	2.114
ko04672	Intestinal immune network for IgA production	Supragingival plaque	1.28504e-05	2.11315
ko04620	Toll-like receptor signaling pathway	Supragingival plaque	2.28981e-05	2.11298
ko04640	Hematopoietic cell lineage	Supragingival plaque	8.53719e-06	2.11258
ko04670	Leukocyte transendothelial migration	Supragingival plaque	8.5301e-06	2.11258
ko04330	Notch signaling pathway	Retroauricular crease	0.000283915	2.11114
ko04664	Fc epsilon RI signaling pathway	Supragingival plaque	3.50666e-06	2.11108
ko04666	Fc gamma R-mediated phagocytosis	Supragingival plaque	8.06165e-06	2.11074
M00263	DNA polymerase epsilon complex	Retroauricular crease	0.00025409	2.10958
ko04062	Chemokine signaling pathway	Retroauricular crease	5.08244e-06	2.10586
ko04662	B cell receptor signaling pathway	Supragingival plaque	6.49765e-06	2.1042
M00112	Tocopherol biosynthesis	Buccal mucosa	1.01607e-06	2.09756
ko04614	Renin-angiotensin system	Anterior nares	9.26851e-05	2.09352
M00085	Fatty acid biosynthesis, elongation, mitochondria	Retroauricular crease	0.000252842	2.09114
M00089	Triacylglycerol biosynthesis	Retroauricular crease	0.000246074	2.08754
M00204	Trehalose/maltose transport system	Supragingival plaque	0.000141512	2.08604
ko03320	PPAR signaling pathway	Retroauricular crease	8.06115e-05	2.08234
M00201	alpha-Glucoside transport system	Stool	0.000111043	2.08126
ko00622	Xylene degradation	Anterior nares	0.000211212	2.06737
M00333	Type IV secretion system	Supragingival plaque	0.000225936	2.06222
ko04920	Adipocytokine signaling pathway	Retroauricular crease	6.85663e-05	2.05827
M00171	C4-dicarboxylic acid cycle, NAD+ -malic enzyme type	Supragingival plaque	0.000263405	2.05804
M00220	Rhamnose transport system	Tongue dorsum	6.0622e-05	2.04551
ko00514	Other types of O-glycan biosynthesis	Retroauricular crease	0.000208637	2.03069
ko04916	Melanogenesis	Supragingival plaque	1.61522e-05	2.00667
