# Supplementary material for: Metabolic Reconstruction for Metagenomic Data and Its Application to the Human Microbiome
Source: PLoS Comput Biol. 2012 Jun 13;8(6):e1002358. doi: 10.1371/journal.pcbi.1002358 (PMC3374609; doi:10.1371/journal.pcbi.1002358)
Supplement: Table S9 — HUMAnN relative abundance estimates for metabolic pathways in the human microbiome. Inferred pathway abundance values for each of 297 KEGG pathways in 649 samples spanning seven body sites across the human microbiome. (XLSX) [file pcbi.1002358.s014.xlsx]

## Sheet: humann-mpt-abd_subset
ID	NAME	SRS011132_vs_KEGG_v54-mpt-cop-nul-nve-nul-nve	SRS011263_vs_KEGG_v54-mpt-cop-nul-nve-nul-nve	SRS011397_vs_KEGG_v54-mpt-cop-nul-nve-nul-nve	SRS012291_vs_KEGG_v54-mpt-cop-nul-nve-nul-nve	SRS012663_vs_KEGG_v54-mpt-cop-nul-nve-nul-nve	SRS013155_vs_KEGG_v54-mpt-cop-nul-nve-nul-nve	SRS013269_vs_KEGG_v54-mpt-cop-nul-nve-nul-nve	SRS013637_vs_KEGG_v54-mpt-cop-nul-nve-nul-nve	SRS013876_vs_KEGG_v54-mpt-cop-nul-nve-nul-nve	SRS013956_vs_KEGG_v54-mpt-cop-nul-nve-nul-nve	SRS014464_vs_KEGG_v54-mpt-cop-nul-nve-nul-nve	SRS014682_vs_KEGG_v54-mpt-cop-nul-nve-nul-nve	SRS014901_vs_KEGG_v54-mpt-cop-nul-nve-nul-nve	SRS015051_vs_KEGG_v54-mpt-cop-nul-nve-nul-nve	SRS015269_vs_KEGG_v54-mpt-cop-nul-nve-nul-nve	SRS015430_vs_KEGG_v54-mpt-cop-nul-nve-nul-nve	SRS015450_vs_KEGG_v54-mpt-cop-nul-nve-nul-nve	SRS015640_vs_KEGG_v54-mpt-cop-nul-nve-nul-nve	SRS015752_vs_KEGG_v54-mpt-cop-nul-nve-nul-nve	SRS015793_vs_KEGG_v54-mpt-cop-nul-nve-nul-nve	SRS015937_vs_KEGG_v54-mpt-cop-nul-nve-nul-nve	SRS015996_vs_KEGG_v54-mpt-cop-nul-nve-nul-nve	SRS016033_vs_KEGG_v54-mpt-cop-nul-nve-nul-nve	SRS016188_vs_KEGG_v54-mpt-cop-nul-nve-nul-nve	SRS016292_vs_KEGG_v54-mpt-cop-nul-nve-nul-nve	SRS016434_vs_KEGG_v54-mpt-cop-nul-nve-nul-nve	SRS016513_vs_KEGG_v54-mpt-cop-nul-nve-nul-nve	SRS016553_vs_KEGG_v54-mpt-cop-nul-nve-nul-nve	SRS016581_vs_KEGG_v54-mpt-cop-nul-nve-nul-nve	SRS016752_vs_KEGG_v54-mpt-cop-nul-nve-nul-nve	SRS017044_vs_KEGG_v54-mpt-cop-nul-nve-nul-nve	SRS017156_vs_KEGG_v54-mpt-cop-nul-nve-nul-nve	SRS017244_vs_KEGG_v54-mpt-cop-nul-nve-nul-nve	SRS017451_vs_KEGG_v54-mpt-cop-nul-nve-nul-nve	SRS017697_vs_KEGG_v54-mpt-cop-nul-nve-nul-nve	SRS017820_vs_KEGG_v54-mpt-cop-nul-nve-nul-nve	SRS018312_vs_KEGG_v54-mpt-cop-nul-nve-nul-nve	SRS018369_vs_KEGG_v54-mpt-cop-nul-nve-nul-nve	SRS018463_vs_KEGG_v54-mpt-cop-nul-nve-nul-nve	SRS018585_vs_KEGG_v54-mpt-cop-nul-nve-nul-nve	SRS018671_vs_KEGG_v54-mpt-cop-nul-nve-nul-nve	SRS018784_vs_KEGG_v54-mpt-cop-nul-nve-nul-nve	SRS018981_vs_KEGG_v54-mpt-cop-nul-nve-nul-nve	SRS019019_vs_KEGG_v54-mpt-cop-nul-nve-nul-nve	SRS019039_vs_KEGG_v54-mpt-cop-nul-nve-nul-nve	SRS019067_vs_KEGG_v54-mpt-cop-nul-nve-nul-nve	SRS019087_vs_KEGG_v54-mpt-cop-nul-nve-nul-nve	SRS019119_vs_KEGG_v54-mpt-cop-nul-nve-nul-nve
RANDSID	Random subject ID	158479027	158742018	158984779	158337416	158398106	159571453	159591683	159207311	763435843	763496533	763577454	763961826	763860675	763901136	763982056	764083206	764083206	764487809	764224817	763435843	764325968	764447348	764508039	764649650	765074482	159672603	159753524	159753524	159915365	160421117	159490532	159551223	159814214	160319967	160582958	160603188	160380657	160178356	160218816	765094712	765013792	765135172	764305738	763961826	763961826	764083206	764083206	763496533
START	Recruitment date	Q1_2009	Q1_2009	Q1_2009	Q1_2009	Q1_2009	Q2_2009	Q2_2009	Q2_2009	Q1_2009	Q1_2009	Q1_2009	Q1_2009	Q1_2009	Q1_2009	Q2_2009	Q2_2009	Q2_2009	Q2_2009	Q2_2009	Q1_2009	Q2_2009	Q2_2009	Q2_2009	Q2_2009	Q2_2009	Q2_2009	Q2_2009	Q2_2009	Q2_2009	Q2_2009	Q2_2009	Q2_2009	Q2_2009	Q2_2009	Q2_2009	Q2_2009	Q2_2009	Q2_2009	Q2_2009	Q2_2009	Q2_2009	Q2_2009	Q2_2009	Q1_2009	Q1_2009	Q2_2009	Q2_2009	Q1_2009
SITE	Recruitment location	Houston	Houston	Houston	Houston	Houston	Houston	Houston	Houston	St. Louis	St. Louis	St. Louis	St. Louis	St. Louis	St. Louis	St. Louis	St. Louis	St. Louis	St. Louis	St. Louis	St. Louis	St. Louis	St. Louis	St. Louis	St. Louis	St. Louis	Houston	Houston	Houston	Houston	Houston	Houston	Houston	Houston	Houston	Houston	Houston	Houston	Houston	Houston	St. Louis	St. Louis	St. Louis	St. Louis	St. Louis	St. Louis	St. Louis	St. Louis	St. Louis
GENDER	Gender	male	female	female	female	male	male	male	male	male	male	female	male	male	female	male	male	male	male	male	male	male	male	male	female	male	male	female	female	female	male	male	male	male	female	female	male	male	male	male	male	female	male	male	male	male	male	male	male
VISNO	Visit number	1	1	1	1	1	1	1	1	1	1	1	1	1	1	1	1	1	1	1	2	1	1	1	1	1	1	1	1	1	1	1	1	1	1	1	1	1	1	1	1	1	1	2	2	2	2	2	2
STSite	Body site	Anterior_nares	Anterior_nares	Anterior_nares	Anterior_nares	Anterior_nares	Anterior_nares	Anterior_nares	Anterior_nares	Anterior_nares	Anterior_nares	Anterior_nares	Anterior_nares	Anterior_nares	Anterior_nares	Anterior_nares	Anterior_nares	Anterior_nares	Anterior_nares	Anterior_nares	Anterior_nares	Anterior_nares	Anterior_nares	Anterior_nares	Anterior_nares	Anterior_nares	Anterior_nares	Anterior_nares	Anterior_nares	Anterior_nares	Anterior_nares	Anterior_nares	Anterior_nares	Anterior_nares	Anterior_nares	Anterior_nares	Anterior_nares	Anterior_nares	Anterior_nares	Anterior_nares	Anterior_nares	Anterior_nares	Anterior_nares	Anterior_nares	Anterior_nares	Anterior_nares	Anterior_nares	Anterior_nares	Anterior_nares
StudyDay_Processed	Days processed after collection	28	7	3	14	20	1	1	8	1	2	3	3	7	6	2	1	1	2	5	85	2	9	6	7	2	1	1	1	1	1	2	5	1	29	44	44	28	36	28	3	2	7	106	153	153	126	126	222
Current_site	Sequencing location	95BIS	95BIS	95BIS	95BIS	95BIS	95BIS	95BIS	95BIS	94WAS	94WAS	94WAS	94WAS	94WAS	94WAS	94WAS	94WAS	94WAS	94WAS	94WAS	94WAS	94WAS	94WAS	94WAS	94WAS	94WAS	95BIS	93BAS	95BIS	95BIS	95BIS	95BIS	95BIS	95BIS	95BIS	95BIS	95BIS	95BIS	95BIS	95BIS	94WAS	94WAS	94WAS	94WAS	94WAS	94WAS	94WAS	94WAS	94WAS
Parent_Specimen	Parent DNA sample	700014797	700015233	700015756	700013733	700014445	700015784	700015976	700016715	700021128	700021311	700023118	700023336	700023556	700023706	700023924	700024085	700024085	700024295	700024407	700024448	700024592	700024651	700024688	700024851	700024955	700032086	700032240	700032240	700032334	700032943	700033556	700033718	700033850	700034184	700034790	700034925	700035746	700035803	700035860	700037031	700037138	700037251	700037450	700037490	700037490	700037538	700037538	700037590
Run ID	Sequencing run	61GT9AAXX	61JGUAAXX	61JCUAAXX	61JFTAAXX	61KYJAAXX	61JHCAAXX	61JFDAAXX	61KTPAAXX	620DK	61NTG	704TB	704JY	618HP	61WC7	704HN	61NMA	61VKJ	620CV	61U50	704UD	704UD	61PER	61U72	61NM5	7055E	61JDBAAXX	621H3AAXX	61JGVAAXX	61GUKAAXX	61JCWAAXX	61GT9AAXX	61JD0AAXX	61NLYAAXX	61JD7AAXX	61JHHAAXX	61JHKAAXX	61GUJAAXX	61JFLAAXX	61JBPAAXX	618H1	618HP	7055E	61TR2	704TU	61WFG	61NM5	61WFG	621F5
Lane	Sequencing lane	2	2	6	4	5	8	6	1	7	7	1	2	7	1	2	1	8	4	5	6	3	5	7	4	6	8	2	4	4	8	8	4	2	2	2	2	2	8	6	5	4	3	6	1	6	7	4	7
SRS	SRS	700014827	700015235	700015758	700013733	700014447	700015784	700015976	700016715	700021128	700021311	700023118	700023336	700023556	700023706	700023924	700024085	700024105	700024295	700024407	700024448	700024592	700024651	700024688	700024851	700024955	700032123	700032240	700032280	700032334	700032943	700033557	700033718	700033850	700034184	700034790	700034925	700035746	700035803	700035897	700037052	700037138	700037251	700037450	700037490	700037510	700037538	700037558	700037590
Mean Quality	Mean base quality	29	28	27	30	32	31	29	32		31.97	33.16	32.9	33.34	35.23	32.32	34.3	32.69	33.73		34.77	33.58	28.67	32.98		34	26	31	29	32	30	30	31	25	32	29	29	32	30	31	33.81	33.59	32.66	33.91	28.98	29.78	33.55	32.02	33.37
Number of Quality Bases	Number of quality bases	6436282718	6536545743	5594306732	5783482683	6167227706	6020124811	5944496056	5507851249		6992140153	4560518567	3607280996	5100855893	1634937318	4761305127	4784068347	5814755527	4172026984		1858199497	3624316967	5086969569	5351930413		4886811989	5842767644	5307734858	5693895947	6079144182	5663735712	6183056528	6225141145	5029635187	5686544063	5979557681	5495658663	6165914554	6174762839	6114760938	4333286848	5102526438	5577193244	3503645475	4002665215	5737758406	5207502936	4829551174	5517831431
Percent of Human Reads	Percent of human reads pre-screening	0.9386	0.9502	0.8887	0.9419	0.9405	0.9429	0.9445	0.9474		0.8197	0.8114	0.7281	0.7784	0.8209	0.8281	0.7526	0.8326	0.8387		0.8064	0.7771	0.6664	0.8238		0.813	0.9392	0.8447	0.9312	0.9452	0.9383	0.9212	0.9412	0.9039	0.9421	0.9448	0.9394	0.9477	0.9478	0.9301	0.8461	0.8326	0.8341	0.785	0.78	0.7626	0.8353	0.7921	0.8317
Unique Non-Human Bases	Number of quality bases post-human-screening	788666276	748516359	885701485	478476081	578576029	560005670	482834806	461284719		420488699	584576790	842587674	710098947	277181274	879306427	1228414505	944735349	694981463		339811618	722077142	896128008	1003957389		953309751	1312867053	5280134637	695562615	482232764	553137895	853815069	549798639	685701996	505268783	552152998	514795984	474801224	608893268	744460203	691370609	844399746	988454661	441433374	849441677	1196391849	732396100	801864492	957283532
ko00900	ko00900: Terpenoid backbone biosynthesis	0.0168398	0.0169273	0.0147529	0.0191049	0.0144111	0.0150751	0.0170161	0.0146519	0.0159777	0.0170447	0.0163752	0.014873	0.0133495	0.0163155	0.0151646	0.0168881	0.0177734	0.0132863	0.0154445	0.0134291	0.01584	0.0160171	0.0148118	0.0149878	0.0152731	0.0157544	0.0130937	0.0139166	0.0149156	0.0140945	0.0148249	0.0160008	0.0127109	0.0146277	0.0150979	0.0145652	0.0132963	0.0153749	0.0152113	0.0163252	0.0170424	0.0152877	0.0161616	0.014004	0.0139826	0.0161955	0.0154997	0.0145058
ko03018	ko03018: RNA degradation	0.0085352	0.00750787	0.00845209	0.00745204	0.00830396	0.0092316	0.0078904	0.00890718	0.00775606	0.00834289	0.0102967	0.00846675	0.0101916	0.00812238	0.00977794	0.00928659	0.00890807	0.00918526	0.00783894	0.0109035	0.0078118	0.00846129	0.00792466	0.00943873	0.00808315	0.00891495	0.00846711	0.00754471	0.00778768	0.00813998	0.00814971	0.00780778	0.00854778	0.00834059	0.00760874	0.0089188	0.00906136	0.00810788	0.00960892	0.00849054	0.00767916	0.0092053	0.00810125	0.00991767	0.00989641	0.00876633	0.00900089	0.0101887
ko00620	ko00620: Pyruvate metabolism	0.01126	0.0106612	0.0134612	0.0100942	0.01568	0.013619	0.0126898	0.0119036	0.0123039	0.0114815	0.0116007	0.013134	0.0124696	0.0108142	0.0140527	0.0126475	0.0122929	0.0121775	0.0128619	0.0109946	0.0123025	0.0121296	0.0137904	0.0121851	0.0131501	0.0124079	0.0138382	0.0125862	0.0139807	0.0136134	0.0135682	0.0124935	0.0164182	0.0129464	0.0121103	0.0143327	0.0136594	0.0142122	0.0128662	0.0145021	0.0130999	0.0127594	0.0115562	0.0118767	0.0118029	0.0127465	0.0123843	0.0113805
ko00760	ko00760: Nicotinate and nicotinamide metabolism	0.0150107	0.0138897	0.0116838	0.0147706	0.012885	0.0130665	0.0124559	0.0135739	0.0131065	0.0166163	0.0123598	0.0143279	0.0123702	0.0139414	0.0138823	0.0146391	0.0104424	0.0104502	0.0127391	0.0121704	0.0138999	0.014428	0.0129854	0.0118044	0.01481	0.0133121	0.0113605	0.0114086	0.0121728	0.0117043	0.0120245	0.0123592	0.0131167	0.0130195	0.0131404	0.0133851	0.0119317	0.0119393	0.0118615	0.0124504	0.0123992	0.0140868	0.0156448	0.0131269	0.0117862	0.0152626	0.014288	0.0115224
ko00670	ko00670: One carbon pool by folate	0.0205425	0.0177456	0.0205934	0.0203326	0.0206389	0.0184274	0.0201253	0.0181063	0.0205883	0.0224315	0.018399	0.0200312	0.0197684	0.0197633	0.0164234	0.0206933	0.0196084	0.0202604	0.0190135	0.0182867	0.0197092	0.0199663	0.0208015	0.0174698	0.0202743	0.0189385	0.0164489	0.0180261	0.01902	0.0194015	0.0197694	0.0198352	0.0195074	0.0205129	0.0196693	0.0211605	0.0166016	0.0175551	0.0194937	0.0216073	0.0206315	0.0187847	0.0199248	0.0192204	0.0176792	0.0203726	0.0200837	0.018636
ko03060	ko03060: Protein export	0.0206792	0.0203143	0.0192091	0.0196803	0.0161257	0.0192067	0.0177064	0.0200674	0.018941	0.0157496	0.0150542	0.0182475	0.0158042	0.0188982	0.0194324	0.0217198	0.0221215	0.0210802	0.0180513	0.0133157	0.0171583	0.0167788	0.0193964	0.0189564	0.0199716	0.0222708	0.0198861	0.01584	0.0175615	0.0169616	0.0173414	0.0183929	0.019361	0.0178268	0.0199499	0.018391	0.0231511	0.0198262	0.0188299	0.0203404	0.0187015	0.0187248	0.0171829	0.0185138	0.0229916	0.0184784	0.0195734	0.0185397
ko00640	ko00640: Propanoate metabolism	0.00792733	0.00774907	0.00711537	0.00724036	0.00851512	0.007611	0.00824263	0.00785419	0.00739744	0.00687364	0.00717174	0.00770563	0.00706925	0.00717601	0.00738149	0.00826938	0.00857638	0.00648475	0.00770261	0.00675114	0.00773881	0.00758444	0.00799176	0.00730128	0.0078324	0.00735773	0.00700828	0.0073095	0.00965386	0.00752798	0.00794525	0.00850857	0.00905273	0.00786896	0.00721529	0.00775034	0.00787951	0.00903437	0.00724662	0.00775127	0.00752001	0.00802125	0.00746258	0.00712224	0.00710952	0.00807414	0.00772677	0.00736479
ko00770	ko00770: Pantothenate and CoA biosynthesis	0.0200779	0.0192225	0.0199962	0.0196015	0.0182538	0.0181729	0.0196392	0.0173904	0.0199037	0.0190838	0.014793	0.0185872	0.0176285	0.0164469	0.0201462	0.0216182	0.0247299	0.0197575	0.0180035	0.016677	0.0174767	0.0184923	0.0173224	0.0165628	0.0198182	0.0205221	0.0178534	0.0181287	0.0215057	0.0187925	0.0190413	0.0190271	0.0168614	0.0184961	0.0187532	0.0187346	0.0214812	0.0209919	0.0206691	0.0180325	0.0172044	0.0181568	0.0175747	0.0169908	0.0189628	0.0199143	0.0209064	0.0178529
ko00650	ko00650: Butanoate metabolism	0.00771316	0.00766919	0.00896215	0.00741041	0.00858573	0.00879965	0.00874753	0.00798549	0.0089043	0.00660386	0.00737822	0.00933878	0.00761903	0.006504	0.0104794	0.00800871	0.00750888	0.00915066	0.00848602	0.00775453	0.00771326	0.00835132	0.0078236	0.00807439	0.00934662	0.00938332	0.00945853	0.00840678	0.00855373	0.00905711	0.00855592	0.00801686	0.00854615	0.00834913	0.00826854	0.0087226	0.0087766	0.00903027	0.00937873	0.00891149	0.00868782	0.0110295	0.00706823	0.00829587	0.0094561	0.00790853	0.00951106	0.0078191
ko03410	ko03410: Base excision repair	0.0111271	0.0112523	0.0128804	0.0129716	0.0130569	0.011525	0.0105796	0.010824	0.0117626	0.0127721	0.0119044	0.0125862	0.0127459	0.0111862	0.012678	0.0114342	0.0100576	0.0123075	0.0124124	0.0119488	0.012574	0.0123944	0.011978	0.0123228	0.0120365	0.012309	0.0107419	0.0108471	0.0130961	0.0116772	0.0122606	0.011705	0.0127219	0.012083	0.0111324	0.0130801	0.0109922	0.0110525	0.011541	0.0133912	0.0114876	0.0118206	0.0121535	0.0120039	0.0109874	0.0120208	0.0132658	0.0115467
ko00230	ko00230: Purine metabolism	0.0114146	0.0110293	0.011732	0.0103959	0.0119109	0.0114091	0.0111416	0.0109427	0.0113782	0.0111191	0.0114491	0.011428	0.0115211	0.0103346	0.0107464	0.0118517	0.0119491	0.00996019	0.0113841	0.0111531	0.0109661	0.0117644	0.0107844	0.0107625	0.0119071	0.011757	0.0109793	0.0100963	0.0107352	0.0112364	0.0115883	0.0110925	0.0120177	0.0118114	0.0114286	0.0120606	0.00937222	0.0116482	0.0109815	0.0124284	0.0111085	0.0114009	0.0107611	0.0115373	0.0110223	0.012291	0.0120186	0.0114586
ko04112	ko04112: Cell cycle - Caulobacter	0.009119	0.0103464	0.0105193	0.00877682	0.0101796	0.00943847	0.00929608	0.00927403	0.00892778	0.00973723	0.0073804	0.00889895	0.0080158	0.0100109	0.0102578	0.0103885	0.0124442	0.00976631	0.00949465	0.00646765	0.00869117	0.00745197	0.0105396	0.00948193	0.00874123	0.00945716	0.00891771	0.00852138	0.0113169	0.00904853	0.00941922	0.00901813	0.0104003	0.00981542	0.00913524	0.0111481	0.00922542	0.0089389	0.0119478	0.00982341	0.00939605	0.00843742	0.00913242	0.00924406	0.00997377	0.00988266	0.0105653	0.00809151
ko03070	ko03070: Bacterial secretion system	0.00980298	0.0101281	0.00957821	0.0091724	0.00776231	0.00957442	0.00864292	0.0100775	0.00903657	0.00797207	0.00673196	0.00925869	0.00714371	0.00945292	0.00974205	0.0107974	0.0107544	0.0108684	0.00872842	0.00560335	0.00831629	0.0079428	0.00909676	0.00929537	0.00929767	0.0106308	0.00997191	0.00832887	0.00833508	0.0081943	0.00832365	0.00899623	0.00993204	0.00855602	0.00947091	0.00932148	0.0116212	0.00969819	0.0108671	0.00929768	0.00879585	0.00866191	0.0084956	0.00889968	0.0111672	0.0094013	0.00994785	0.00853748
ko00240	ko00240: Pyrimidine metabolism	0.0155056	0.0148852	0.0152019	0.0145466	0.016272	0.0144126	0.0143719	0.0143559	0.0137109	0.0151651	0.014273	0.0138459	0.0144968	0.0139287	0.0142529	0.014905	0.0162041	0.0130743	0.0145081	0.0134967	0.0144709	0.0140172	0.0138208	0.014014	0.0147376	0.0146697	0.0139588	0.0130623	0.0134048	0.013981	0.0147918	0.0141343	0.016213	0.0150414	0.0147606	0.0156759	0.0126637	0.0148595	0.013459	0.0156971	0.0142086	0.0143592	0.0147296	0.0143734	0.0147902	0.0151734	0.0147862	0.0143747
ko00030	ko00030: Pentose phosphate pathway	0.0178766	0.0188452	0.0161719	0.0170919	0.0200884	0.0157202	0.0176993	0.0175142	0.0165773	0.0185588	0.0179608	0.0167593	0.017988	0.0200199	0.0130502	0.0168854	0.0175615	0.0122775	0.0194539	0.0167058	0.0189835	0.0172628	0.0181775	0.0181984	0.0173702	0.0178405	0.0175891	0.0191459	0.0181047	0.0179515	0.0178512	0.0189836	0.0185575	0.0185678	0.0188593	0.0177933	0.012342	0.0183783	0.0144603	0.0186542	0.0195496	0.0174558	0.018534	0.0165095	0.016939	0.0168545	0.0176948	0.0174783
ko00300	ko00300: Lysine biosynthesis	0.0196555	0.0167109	0.0177032	0.0171498	0.0131956	0.0165351	0.0164902	0.0167305	0.0166422	0.0179353	0.0150193	0.0160654	0.0141938	0.0179552	0.0162562	0.0192506	0.0223696	0.017786	0.0148863	0.013728	0.0160636	0.0161088	0.0157342	0.0140518	0.0170673	0.0142341	0.0126982	0.0142796	0.0159067	0.0156243	0.0147349	0.0173286	0.0130272	0.0153829	0.0171045	0.01565	0.0173582	0.0157088	0.0165405	0.0168793	0.0159029	0.0147633	0.0170303	0.0158447	0.0162032	0.0188985	0.0180864	0.0160623
ko00250	ko00250: Alanine, aspartate and glutamate metabolism	0.0196209	0.0184584	0.0167991	0.0206441	0.0168422	0.0189904	0.0186852	0.0205592	0.0195898	0.0197142	0.0183683	0.01986	0.0169108	0.0181292	0.0173921	0.0191986	0.020527	0.0180504	0.0180614	0.017193	0.0177092	0.0194226	0.0161473	0.017048	0.0198833	0.0192029	0.0169754	0.016824	0.0174418	0.0184462	0.0179586	0.0177956	0.0160283	0.0180647	0.0198125	0.0181455	0.0151303	0.0182928	0.0177938	0.01832	0.0184282	0.0188592	0.0172976	0.0191569	0.0193657	0.020175	0.0202454	0.0170725
ko00680	ko00680: Methane metabolism	0.00449443	0.00449721	0.00446558	0.00402941	0.00484443	0.00464677	0.00431783	0.00441387	0.0042051	0.0047748	0.00417892	0.00446461	0.00429988	0.00411473	0.00496918	0.00467186	0.00450421	0.005135	0.00444287	0.00374972	0.00444188	0.00442557	0.00441431	0.00439124	0.00451967	0.00480355	0.00439077	0.00444514	0.00428894	0.00447747	0.0047805	0.00441241	0.00511283	0.0046584	0.00427436	0.004959	0.00503575	0.00490324	0.00505404	0.00465633	0.00443967	0.00412198	0.00438113	0.00452351	0.00456188	0.00488361	0.0049696	0.00433964
ko00270	ko00270: Cysteine and methionine metabolism	0.00967566	0.0100604	0.0139525	0.0110594	0.011694	0.0127985	0.0107786	0.0105881	0.0115055	0.0116746	0.0114018	0.0129607	0.0125521	0.0103743	0.0126024	0.010889	0.00979106	0.0129895	0.011348	0.0109916	0.0108022	0.0122944	0.0107466	0.0109642	0.0123128	0.0114595	0.0107458	0.00974485	0.0108441	0.0113998	0.0108947	0.0105406	0.012039	0.0125041	0.0112633	0.0121588	0.0112126	0.0122156	0.0135281	0.0129717	0.0113203	0.0125815	0.00926285	0.0116181	0.0113271	0.011496	0.0106824	0.0111171
ko00010	ko00010: Glycolysis / Gluconeogenesis	0.0149552	0.0138305	0.0144276	0.0137383	0.0183521	0.0143801	0.0167894	0.0147816	0.013879	0.0148903	0.0145709	0.0131537	0.0145574	0.0155834	0.0113264	0.0139569	0.0130296	0.0114907	0.0156151	0.0120291	0.015755	0.0131835	0.0150271	0.0149318	0.0143635	0.0144865	0.0154301	0.0154475	0.0156168	0.0155632	0.0164854	0.0163422	0.0185159	0.0144188	0.015809	0.0149848	0.0104019	0.0157326	0.0116722	0.0160719	0.0156978	0.0130964	0.0153547	0.0135473	0.0141106	0.0141418	0.0142408	0.0145665
ko03420	ko03420: Nucleotide excision repair	0.010369	0.0114575	0.00966769	0.0112569	0.0101409	0.00872796	0.00931488	0.0106874	0.00944719	0.010287	0.010526	0.00957509	0.0113376	0.00893038	0.00850688	0.0103259	0.0117672	0.0083325	0.00978833	0.0114283	0.00936389	0.0101009	0.00966009	0.0107293	0.0100145	0.0104026	0.00983991	0.00960616	0.00896293	0.00966014	0.00949807	0.00975908	0.00911052	0.0100425	0.0102719	0.0101113	0.00854328	0.00926839	0.00804205	0.0112554	0.00965035	0.0106765	0.00939655	0.0108627	0.0117251	0.00997095	0.0114461	0.0121883
ko00910	ko00910: Nitrogen metabolism	0.00633676	0.00734057	0.00627867	0.00820609	0.00658054	0.00786866	0.0073526	0.0079843	0.00845908	0.00641904	0.00713877	0.00792484	0.00628387	0.00794735	0.00743606	0.00597854	0.00501094	0.00662628	0.00780476	0.00629151	0.00731886	0.00726239	0.00816512	0.00711142	0.00700726	0.00756491	0.00768862	0.00843375	0.00756558	0.007427	0.00786789	0.00735645	0.00657104	0.00754393	0.0079717	0.00686267	0.00648	0.00760801	0.00840366	0.00742238	0.00761902	0.00818782	0.00637339	0.00713208	0.00704691	0.00569886	0.00549263	0.00611729
ko03440	ko03440: Homologous recombination	0.0179753	0.0176551	0.0175073	0.017873	0.0170626	0.0162481	0.0165822	0.0178292	0.0158078	0.0176956	0.0143821	0.0150573	0.0138367	0.0170376	0.0147984	0.0159756	0.0155177	0.0150474	0.0169997	0.0124556	0.0163267	0.0159557	0.0160588	0.015514	0.0157952	0.0168347	0.0162268	0.0165861	0.0152658	0.0156365	0.0172315	0.0159408	0.0169632	0.0165724	0.0173812	0.0172012	0.0134418	0.0163082	0.0158559	0.0159388	0.0160559	0.0150277	0.0169732	0.0146029	0.0152105	0.0166987	0.0173617	0.0152293
ko00908	ko00908: Zeatin biosynthesis	0.00999133	0.00635001	0.00596394	0.00880387	0.00584963	0.00589031	0.00655022	0.00880352	0.00599962	0.00638727	0.00838467	0.00590926	0.00546227	0.00631341	0.00534573	0.0072127	0.00780509	0.0057625	0.00606028	0.00444469	0.00638022	0.00604138	0.00660637	0.00695447	0.00616182	0.00720538	0.00707631	0.00598718	0.00570892	0.00632879	0.00682795	0.00749492	0.00662843	0.00796425	0.00672519	0.00636045	0.00475165	0.00767947	0.00726926	0.0075813	0.00575682	0.00612118	0.0084976	0.00515585	0.00510054	0.00554798	0.00648796	0.00559799
ko00520	ko00520: Amino sugar and nucleotide sugar metabolism	0.0128972	0.0125759	0.0127871	0.0139971	0.0169069	0.0117773	0.01428	0.0131395	0.0121635	0.0126051	0.0128397	0.0124963	0.0121658	0.0151822	0.0094424	0.0111465	0.00941544	0.00970102	0.0140037	0.0106905	0.0145019	0.0122096	0.0133813	0.0129586	0.0115798	0.0119652	0.0116011	0.0135175	0.0128413	0.0125379	0.0141395	0.0134517	0.0161355	0.0130099	0.0138833	0.0134668	0.00968379	0.0132614	0.00931744	0.0130918	0.0127163	0.011528	0.0128894	0.0120147	0.0108462	0.0113049	0.011055	0.0114576
ko03020	ko03020: RNA polymerase	0.00756536	0.0068525	0.00749636	0.00615811	0.00848926	0.00738098	0.00639936	0.00651327	0.00671936	0.00767518	0.00781875	0.00737747	0.00886762	0.00515327	0.00750602	0.00748232	0.00839817	0.00716086	0.00695296	0.00954733	0.00650788	0.00688765	0.00652942	0.00767363	0.00783249	0.00801611	0.0074685	0.00557406	0.00646988	0.00724803	0.00766914	0.00666129	0.00843357	0.00769707	0.00694829	0.00806056	0.00758959	0.00742719	0.00690134	0.007578	0.00636655	0.00880099	0.00580787	0.00871444	0.00934159	0.00755917	0.00856107	0.00923488
ko00730	ko00730: Thiamine metabolism	0.0207472	0.0180463	0.0183859	0.0184746	0.0223891	0.0201228	0.0166399	0.0181317	0.019724	0.0206284	0.0190542	0.019703	0.0161867	0.0207821	0.0195662	0.0187409	0.0127877	0.0213543	0.020075	0.0142686	0.0218131	0.0203571	0.0184875	0.0192457	0.018607	0.0173611	0.0181762	0.0175973	0.0155468	0.0192033	0.0189723	0.0178907	0.018421	0.0179177	0.019628	0.0216579	0.0194788	0.0179952	0.0183103	0.0190229	0.0189465	0.0166886	0.0213458	0.0175476	0.0158428	0.0182666	0.0171568	0.0163534
ko00550	ko00550: Peptidoglycan biosynthesis	0.0203207	0.0188019	0.0213367	0.0166048	0.0198034	0.0190606	0.0183769	0.0205864	0.0172783	0.017305	0.0153513	0.0166165	0.0148394	0.0181571	0.0180771	0.0185868	0.0201464	0.0193674	0.0177669	0.0118078	0.0184273	0.0161559	0.018255	0.0170294	0.0166857	0.0173944	0.0176509	0.0168068	0.0172785	0.0166997	0.0182403	0.0181384	0.018312	0.0176824	0.0177296	0.0204681	0.0213512	0.0193118	0.0218421	0.0186837	0.015983	0.0144961	0.0188811	0.0154499	0.0161823	0.0179953	0.0183678	0.0153797
ko00450	ko00450: Selenocompound metabolism	0.0090134	0.0108151	0.0119142	0.0102872	0.0152052	0.0109433	0.0103064	0.0105631	0.0150225	0.00758184	0.0127899	0.0157368	0.0129268	0.00714679	0.0135614	0.0121312	0.00969182	0.0106293	0.0132179	0.0114697	0.0108038	0.0151114	0.0099593	0.00915067	0.0146417	0.0131575	0.011739	0.00886233	0.00993953	0.0121103	0.0145563	0.00875269	0.0134406	0.014372	0.0104498	0.0129843	0.00728696	0.0126107	0.013429	0.0135209	0.0114693	0.0152243	0.00723582	0.0119477	0.0105332	0.0129597	0.0115675	0.0106811
ko03030	ko03030: DNA replication	0.0138289	0.0143799	0.0138844	0.0149776	0.0141471	0.0121688	0.0141417	0.0132177	0.0130002	0.0146767	0.0144219	0.0125368	0.0126344	0.0128102	0.0112974	0.01412	0.0145573	0.0119226	0.0131389	0.0124815	0.0135362	0.0140751	0.0137637	0.0129506	0.0133785	0.0143055	0.0141241	0.0133384	0.0134507	0.0131177	0.0134809	0.0129236	0.0133367	0.01365	0.0137821	0.0135006	0.0107733	0.0134245	0.0116634	0.0142651	0.01303	0.0133522	0.0131453	0.012679	0.0131779	0.0143539	0.0144415	0.0132074
ko00260	ko00260: Glycine, serine and threonine metabolism	0.0137861	0.0142259	0.0139372	0.0141919	0.0131083	0.0147014	0.014019	0.0134876	0.0147066	0.0144184	0.0144418	0.0149518	0.0133492	0.0144816	0.0147685	0.0129144	0.0109107	0.0155879	0.0137203	0.0138263	0.0139899	0.0145978	0.0127363	0.0139761	0.0143656	0.0127411	0.0128939	0.0133931	0.0134831	0.0140818	0.0135209	0.0141347	0.0135355	0.0134461	0.0147544	0.0138419	0.0156284	0.0127971	0.0135936	0.0142163	0.0142897	0.0135255	0.0126244	0.0143999	0.0131821	0.0140451	0.013089	0.0131472
ko03010	ko03010: Ribosome	0.0242136	0.0221862	0.0280143	0.0219339	0.0315098	0.0263613	0.0226369	0.0244284	0.025648	0.0264473	0.0234392	0.0258107	0.0231218	0.0222131	0.0275338	0.0276447	0.0264885	0.0315472	0.0261271	0.0191847	0.0250967	0.025094	0.0218992	0.0238773	0.0256523	0.0256944	0.022206	0.0206728	0.0207752	0.0237517	0.0274844	0.0228103	0.03483	0.0275833	0.0242045	0.0323965	0.0294777	0.0243372	0.0277892	0.0306659	0.0237713	0.0270964	0.0246922	0.0243452	0.0268142	0.0283611	0.0285406	0.0233729
ko00970	ko00970: Aminoacyl-tRNA biosynthesis	0.0219323	0.021271	0.02517	0.0225389	0.0260941	0.0226984	0.0191946	0.0215283	0.0211246	0.0207738	0.0192024	0.0211182	0.0213986	0.0190348	0.0238776	0.0225997	0.0238102	0.0247911	0.0218495	0.0186889	0.0210395	0.0210744	0.0220463	0.0203255	0.0215687	0.0228511	0.0200268	0.0178152	0.0196312	0.0210771	0.0237468	0.0212848	0.0269308	0.022494	0.0207873	0.0260897	0.0221396	0.0215399	0.0228502	0.0229707	0.020717	0.0210009	0.0214248	0.0218037	0.022949	0.0223851	0.0232639	0.0213413
ko02020	ko02020: Two-component system	0.00343059	0.0036227	0.00433928	0.00356288	0.00360441	0.00458931	0.00433472	0.00404993	0.00364511	0.00399729	0.00314982	0.0034653	0.00285918	0.00402038	0.00365058	0.00324166	0.00370901	0.00438916	0.00396521	0.00266818	0.00394321	0.00303887	0.00469362	0.00377358	0.00378186	0.00423748	0.00537611	0.00492649	0.00524521	0.00410951	0.0039257	0.00416373	0.0039721	0.00348094	0.00420503	0.00404531	0.00453713	0.00450259	0.00292058	0.0041349	0.00462259	0.00341959	0.00379267	0.00335588	0.00365019	0.00333937	0.00374923	0.00310903
ko00471	ko00471: D-Glutamine and D-glutamate metabolism	0.0239569	0.0231929	0.0281451	0.0224745	0.0276152	0.0217872	0.0243404	0.029045	0.0241512	0.0246178	0.0231769	0.0226451	0.0189242	0.0300026	0.0209984	0.024177	0.0245909	0.0231427	0.0257546	0.0178841	0.0256357	0.0227635	0.0234102	0.0233221	0.0220922	0.0247731	0.0248321	0.0255535	0.0279681	0.0229695	0.0259233	0.0246134	0.0247045	0.024822	0.0248877	0.0265926	0.0242141	0.0253462	0.0311916	0.0243593	0.0226706	0.0182374	0.0255331	0.0216514	0.019934	0.0230091	0.0276406	0.0222405
ko00350	ko00350: Tyrosine metabolism	0.00326259	0.00468077	0.00510821	0.00503028	0.00451566	0.00504526	0.00469622	0.00373765	0.0049761	0.00513309	0.00460634	0.0046233	0.0046607	0.00450496	0.00559775	0.00404728	0.0036586	0.00483859	0.0048051	0.00457739	0.00470088	0.00425118	0.00497717	0.00465093	0.00481809	0.0047048	0.00493595	0.00521296	0.00594237	0.00501471	0.00557196	0.00486301	0.00553959	0.00454808	0.0045412	0.00449089	0.00549476	0.00454943	0.00501926	0.00504627	0.00477302	0.0051656	0.00449508	0.00440941	0.00442491	0.00387959	0.0044188	0.00459578
ko00290	ko00290: Valine, leucine and isoleucine biosynthesis	0.0284471	0.0238357	0.0297654	0.0275727	0.0224023	0.0255231	0.0247616	0.025203	0.0283155	0.0240074	0.0231476	0.0285589	0.0226476	0.0206609	0.0297146	0.0289807	0.0358889	0.0297728	0.0240681	0.0219217	0.0229377	0.0267045	0.024619	0.0230132	0.0282446	0.0287026	0.0216089	0.0232517	0.0232905	0.0248465	0.0236412	0.0249934	0.0244338	0.0260126	0.0259997	0.0264912	0.0281856	0.025494	0.0267129	0.0251324	0.0241681	0.0264674	0.0243253	0.0262108	0.0273042	0.0313602	0.0314802	0.0256377
ko00790	ko00790: Folate biosynthesis	0.0158849	0.014727	0.0168986	0.0180562	0.0172789	0.0166186	0.019698	0.0158205	0.0164518	0.0162915	0.0158882	0.0173819	0.0156632	0.0162208	0.0162664	0.0166148	0.0124575	0.0189782	0.0181437	0.0130882	0.0177617	0.0182963	0.0206539	0.0170808	0.0172928	0.0182023	0.0171492	0.0178655	0.0151777	0.016512	0.0165012	0.0190686	0.0183803	0.0162537	0.0164744	0.0164059	0.018571	0.0165824	0.016391	0.0152792	0.0194021	0.0170512	0.0147403	0.0159231	0.0131842	0.0161671	0.0164295	0.0147431
ko00564	ko00564: Glycerophospholipid metabolism	0.00522675	0.00530719	0.00677487	0.00620899	0.00539834	0.00602706	0.00505118	0.00555395	0.00483967	0.0058981	0.00577774	0.00494997	0.00616125	0.00602081	0.00567182	0.00554068	0.00538246	0.00545908	0.00569605	0.00626183	0.00572889	0.00461052	0.00744076	0.00661161	0.00482809	0.00557872	0.00770452	0.00684198	0.005709	0.00596758	0.00558104	0.00587292	0.00569673	0.00572142	0.00585117	0.005854	0.0061366	0.0062883	0.00598572	0.00552381	0.00600072	0.00525817	0.00571634	0.0057792	0.00618784	0.00485001	0.00515689	0.00654532
ko00430	ko00430: Taurine and hypotaurine metabolism	0.00875201	0.00657173	0.00752446	0.00911702	0.0113885	0.00706824	0.00881677	0.00886659	0.00734683	0.0076082	0.00788528	0.00955091	0.00843387	0.00510176	0.00871879	0.0106093	0.00943506	0.00589571	0.00893476	0.00690581	0.00800909	0.0090635	0.00981186	0.0079706	0.0102592	0.00922292	0.0073839	0.00680013	0.0105164	0.00798652	0.00793607	0.00816617	0.0113631	0.00907477	0.00721752	0.00981688	0.00573366	0.0108897	0.00805045	0	0.00776375	0.00766235	0.00755923	0.00761326	0.00852854	0.0109897	0.0102046	0.00710314
ko00500	ko00500: Starch and sucrose metabolism	0.0099835	0.0094846	0.00914998	0.011517	0.0101847	0.0075714	0.0104044	0.00995559	0.00665777	0.0091753	0.00888805	0.00711266	0.00844531	0.0121008	0.00495494	0.00680578	0.00587954	0.00439037	0.0103749	0.00631875	0.0101888	0.00758417	0.0103897	0.00937932	0.00669876	0.00902506	0.00818577	0.0100684	0.00937875	0.0085507	0.0109662	0.00995826	0.0119807	0.00906468	0.0105697	0.00965699	0.00510962	0.00917487	0.00572752	0.0104196	0.0101326	0.00586606	0.00980201	0.00787059	0.00804839	0.00728499	0.00731688	0.00855321
ko03430	ko03430: Mismatch repair	0.014079	0.0142022	0.0155431	0.0155426	0.0157023	0.0130393	0.0139409	0.0148272	0.013707	0.0133594	0.0157484	0.0131269	0.0132138	0.0127574	0.0109957	0.01486	0.0155987	0.0136162	0.0142752	0.012176	0.0142402	0.0144874	0.0137886	0.0132499	0.0140822	0.0154468	0.0144303	0.0143082	0.0146241	0.0134547	0.0145954	0.0137303	0.015767	0.0147327	0.0148504	0.0146243	0.00882467	0.0152019	0.0139306	0.015097	0.0143592	0.0135643	0.0127544	0.0124856	0.0132576	0.0154081	0.0155694	0.0131406
ko04626	ko04626: Plant-pathogen interaction	0.00126259	0.000920645	0.00111685	0.000692396	0.00135404	0.00133294	0.000733466	0.000874333	0.000985531	0.00110982	0.000882154	0.0011546	0.000951551	0.000947344	0.00133676	0.000801344	0.00127303	0.00152538	0.00101018	0.000934676	0.000967227	0.00100318	0.000901951	0.00103207	0.000955552	0.0011602	0.000714868	0.000947164	0.000911555	0.00108189	0.0010618	0.00088744	0.00193175	0.00119199	0.00103925	0.00145323	0.0013726	0.00110347	0.00159443	0.0010132	0.000943008	0.00125763	0.000899835	0.00110571	0.00136609	0.000947376	0.00127287	0.000869554
ko00280	ko00280: Valine, leucine and isoleucine degradation	0.00493053	0.00632264	0.00529204	0.00699967	0.00583451	0.00561963	0.00592068	0.00563119	0.00585673	0.00494911	0.00563332	0.005697	0.00551279	0.00565171	0.00671989	0.00489551	0.00458955	0.00638231	0.0059258	0.00612456	0.0053318	0.0053631	0.00676633	0.0061377	0.00520321	0.00573319	0.00693705	0.00609339	0.00670857	0.00587936	0.00599779	0.00579198	0.0058908	0.00526801	0.00554279	0.00520174	0.00728156	0.00645899	0.00568306	0.00586136	0.00545338	0.00758019	0.00498954	0.00571229	0.00579701	0.00479121	0.00481957	0.00500742
ko00051	ko00051: Fructose and mannose metabolism	0.0135321	0.0132685	0.0111742	0.0131552	0.0157416	0.0105025	0.0138977	0.0129977	0.0121108	0.0137132	0.013524	0.0111871	0.0118906	0.0155157	0.00687224	0.0101783	0.00947104	0.00793747	0.0135883	0.010559	0.0150002	0.0126168	0.013867	0.0137619	0.0107038	0.0112575	0.0131432	0.0138634	0.013409	0.0126136	0.0140085	0.0142153	0.0145481	0.0121656	0.0145487	0.012578	0.00625171	0.0134052	0.0071424	0.011718	0.0144642	0.0112549	0.0147439	0.0116046	0.0103078	0.0111116	0.0105588	0.0113889
ko00740	ko00740: Riboflavin metabolism	0.00995533	0.00978521	0.00842459	0.00971103	0.00583623	0.0107129	0.00938569	0.00929326	0.00868017	0.00987624	0.00747148	0.00950668	0.00918926	0.0103812	0.0128832	0.0107811	0.011629	0.013881	0.00776284	0.00955104	0.00919738	0.009163	0.00778234	0.0102227	0.00980023	0.00788677	0.00759153	0.00906336	0.00939849	0.00957568	0.00715209	0.00903841	0.00646839	0.00828884	0.00978434	0.00887986	0.0118675	0.0103622	0.0117609	0.00957512	0.0095786	0.00778927	0.00989009	0.0100264	0.00888007	0.0108186	0.0103906	0.00957139
ko04122	ko04122: Sulfur relay system	0.0112021	0.012117	0.0118608	0.011779	0.0123398	0.0134961	0.0111968	0.0118279	0.0140906	0.0107661	0.0130794	0.0131845	0.0117928	0.0129963	0.018621	0.0108532	0.0107718	0.0198688	0.013177	0.0118357	0.0129739	0.0125315	0.0128315	0.0138857	0.0134799	0.0123233	0.0167111	0.01188	0.0123285	0.0134091	0.0128433	0.0124722	0.0121485	0.0118264	0.0112033	0.0138862	0.0201017	0.0118702	0.0140675	0.0136546	0.0149706	0.0109511	0.0120914	0.0110378	0.0102251	0.0115043	0.0110288	0.0112667
ko00720	ko00720: Carbon fixation pathways in prokaryotes	0.015146	0.0129771	0.0118554	0.0130926	0.0131271	0.0143437	0.0125891	0.0133758	0.0128954	0.0141054	0.0119683	0.0117975	0.0111972	0.0141363	0.0149055	0.01493	0.0133444	0.0132137	0.0124027	0.00999401	0.0135641	0.0125286	0.0121279	0.0126488	0.0123157	0.0118646	0.0113349	0.0126937	0.0144396	0.0129977	0.0126936	0.0139566	0.0129723	0.0120054	0.0130464	0.0136611	0.0164382	0.0139478	0.0143855	0.0139128	0.0133598	0.0125447	0.0146106	0.0123664	0.0123603	0.0143065	0.0138595	0.0119966
ko00330	ko00330: Arginine and proline metabolism	0.00856055	0.00886808	0.00662094	0.00804661	0.00689116	0.0082655	0.00920243	0.00850984	0.00837381	0.00780447	0.00841843	0.00766286	0.00748488	0.00915946	0.00715769	0.00842961	0.00913812	0.00660497	0.00818495	0.00780238	0.00818178	0.00772782	0.00864221	0.00812129	0.00855286	0.00881926	0.00971259	0.00953218	0.00896231	0.00881666	0.00856109	0.00960279	0.00751961	0.00739788	0.00916094	0.00713792	0.00689594	0.00898972	0.00784147	0.00833428	0.00874274	0.00847068	0.00838734	0.00795133	0.00790132	0.00809874	0.00828264	0.00797107
ko00750	ko00750: Vitamin B6 metabolism	0.0177449	0.0157976	0.0148366	0.015518	0.0122418	0.0158121	0.014795	0.018989	0.0162282	0.0213048	0.0171996	0.0158272	0.0151131	0.0188996	0.0167514	0.0188752	0.0202103	0.0161949	0.0146299	0.0167934	0.0154716	0.0172605	0.0178171	0.0148959	0.0169591	0.0123552	0.0139169	0.0147723	0.0170157	0.0152431	0.0134064	0.0183953	0.0125793	0.0142489	0.0153273	0.0141325	0.0150783	0.0151146	0.0155987	0.0157322	0.0148295	0.0126047	0.0164131	0.016509	0.0137392	0.0183338	0.0168038	0.015322
ko00480	ko00480: Glutathione metabolism	0.00802364	0.00833911	0.00897284	0.00708936	0.00790329	0.00929276	0.00720349	0.00742032	0.00809616	0.00960917	0.00891912	0.00900478	0.0104827	0.00817922	0.0124214	0.00804308	0.00659845	0.00980919	0.00822085	0.0106002	0.00807557	0.00838198	0.00875386	0.00830306	0.00882712	0.00801428	0.00875113	0.00895716	0.00690936	0.00866086	0.00770601	0.00874835	0.00818628	0.00880562	0.00827391	0.00934867	0.00774818	0.00803817	0.0109871	0.00745816	0.00802782	0.00918837	0.00770901	0.00908169	0.00990442	0.00771062	0.0075673	0.00999147
ko00920	ko00920: Sulfur metabolism	0.00578283	0.00575464	0.00887882	0.00657882	0.0058684	0.00945948	0.00714835	0.00617474	0.00945376	0.00832579	0.0100268	0.0113775	0.0102735	0.00484016	0.0134596	0.00839204	0.00791477	0.00717028	0.00812333	0.00984906	0.00711416	0.0107389	0.00762135	0.00748213	0.0107841	0.00993705	0.0111007	0.007607	0.00808282	0.00992288	0.00795578	0.00727794	0.0066536	0.00900164	0.00778931	0.00733408	0.00706451	0.0112548	0.0123798	0.00906294	0.00998236	0.0112748	0.00515424	0.00875616	0.00818708	0.00920677	0.00848421	0.00900032
ko00521	ko00521: Streptomycin biosynthesis	0.0149576	0.0143072	0.0121719	0.0153095	0.0139129	0.0107787	0.0120988	0.0147012	0.019824	0.0126375	0.0155084	0.019311	0.0148561	0.0114701	0.00829116	0.0189861	0.0180568	0.00891325	0.0148762	0.0138714	0.013954	0.0183938	0.0121723	0.00912061	0.0194048	0.0162184	0.00805389	0.00936127	0.00880077	0.0120928	0.014138	0.0135982	0.0113553	0.0168218	0.0160615	0.0130876	0.00548115	0.0134725	0.0113434	0.0150402	0.0128655	0.0181594	0.0137638	0.0144253	0.0155641	0.0202789	0.0201518	0.0140876
ko00190	ko00190: Oxidative phosphorylation	0.00872968	0.00840044	0.00689654	0.00896161	0.00659752	0.00884495	0.00753631	0.00916661	0.00705349	0.00941905	0.00939163	0.00739178	0.00998863	0.010008	0.00924373	0.00747943	0.00865388	0.00883954	0.00710144	0.0112561	0.0080522	0.00749405	0.0078944	0.0108062	0.00782696	0.00950805	0.0089588	0.00914813	0.00734042	0.00811235	0.00703488	0.00861089	0.0067304	0.00776662	0.00834775	0.00742816	0.0089555	0.00719184	0.00844756	0.00807694	0.00752587	0.00850969	0.00937494	0.0118077	0.016654	0.00773676	0.00832165	0.0120307
ko02010	ko02010: ABC transporters	0.00559598	0.00597765	0.00704727	0.00640418	0.00790818	0.00603997	0.00634705	0.00637715	0.00571523	0.0053842	0.00528721	0.00546784	0.00533414	0.00665711	0.00639633	0.00519874	0.00445252	0.00554333	0.0069401	0.00422881	0.00649417	0.00492107	0.00721261	0.00632679	0.00514853	0.00622645	0.0074956	0.00752545	0.00641259	0.00587201	0.00736682	0.00597347	0.0074809	0.00659619	0.00639086	0.00696934	0.00539158	0.00624289	0.00576633	0.00690645	0.00617735	0.00565292	0.00591142	0.00524592	0.00561118	0.00509369	0.00508668	0.00500604
ko00020	ko00020: Citrate cycle (TCA cycle)	0.0184409	0.016863	0.0130793	0.0152306	0.0144818	0.0180794	0.0161334	0.0167906	0.0178192	0.0177228	0.0168046	0.0163147	0.0161054	0.0179546	0.0175927	0.0171172	0.0164847	0.0170697	0.0160849	0.0159837	0.0173493	0.0167771	0.0158789	0.0164054	0.0169631	0.015765	0.0152396	0.0174958	0.0158563	0.0174828	0.0162432	0.0176035	0.0147699	0.0149265	0.0174203	0.0163578	0.0187551	0.0166447	0.0172077	0.0168591	0.0177303	0.0174809	0.0188094	0.0170162	0.0170056	0.017209	0.0173419	0.0159456
ko00400	ko00400: Phenylalanine, tyrosine and tryptophan biosynthesis	0.0102127	0.0119079	0.0144379	0.0103709	0.00810593	0.0129636	0.0108349	0.0119441	0.0141291	0.0119473	0.0113554	0.0142535	0.0107649	0.0110064	0.0125114	0.0121378	0.011762	0.0128552	0.0102808	0.012096	0.0109119	0.0132083	0.0119394	0.0114574	0.0137864	0.0127091	0.00997657	0.00979017	0.0111878	0.0112841	0.0101593	0.0107524	0.00764121	0.0119417	0.0123563	0.0104187	0.0139801	0.0120083	0.0123492	0.0117353	0.0114595	0.0136175	0.0118557	0.0114102	0.0102697	0.0132779	0.0125603	0.0108725
ko00071	ko00071: Fatty acid metabolism	0	0.00374384	0.00412005	0.00259559	0.00487241	0.00532097	0.00441929	0.00256071	0.00561079	0.00289411	0.00403865	0.0037749	0.00436772	0.00277559	0.00579673	0.00318172	0.00372114	0.00599363	0.00448994	0.00472249	0.00341485	0.0036396	0.00410093	0.00405121	0.00369104	0.00321799	0.00516728	0.00415686	0.0064348	0.00458829	0.00552467	0.00401527	0.00570839	0.00378337	0.00305035	0.00466979	0.00533805	0.00435414	0.00476643	0.00405238	0.00371135	0.00547071	0.00250468	0.00403043	0.00400222	0.00294163	0.003138	0.00381061
ko00630	ko00630: Glyoxylate and dicarboxylate metabolism	0.0063557	0.00748476	0.00486107	0.00645124	0.00558078	0.00652273	0.00614311	0.00679051	0.00754178	0.00678601	0.00681297	0.00633995	0.00587961	0.00766494	0.00687469	0.00654046	0.00545261	0.00690111	0.00677814	0.00621613	0.00687392	0.00663718	0.00596637	0.00620797	0.00619333	0.00638922	0.00571741	0.00711173	0.0063688	0.00644835	0.00701132	0.00618495	0.00602673	0.00631463	0.00671475	0.00603874	0.00750423	0.00580068	0.00686836	0.00619056	0.00688945	0.00738608	0.00698974	0.0065093	0.00649714	0.00604223	0.00678041	0.00554994
ko00380	ko00380: Tryptophan metabolism	0.00306694	0.00468095	0.00354355	0	0.00369923	0.00464926	0.00372043	0.00330793	0.00454668	0.00357383	0.00343756	0.00361936	0.00388774	0.00379978	0.00465143	0.00339075	0.0034513	0.00583631	0.0039393	0.00405839	0.0034327	0.00367882	0.00385314	0.00408468	0.00360679	0.00379129	0.00410448	0.00364025	0.00435712	0.0043851	0.00468672	0.00389618	0.00387412	0.003634	0.0036113	0.00400534	0.00472249	0.00400615	0.00380541	0.00403057	0.00370364	0.0045596	0.00357195	0.00391705	0.0043159	0.00370108	0.00333167	0.00366728
ko00310	ko00310: Lysine degradation	0.00234303	0.00311772	0.00358701	0.00304329	0.00267262	0.00496958	0.00409347	0.00297539	0.00430589	0.00335487	0.00402895	0.003804	0.00446411	0.00269255	0.00545446	0.00314178	0.00359123	0.00559962	0.00352404	0.00508953	0.00292933	0.00366561	0.00352449	0.0040584	0.00361791	0.00326237	0.00381052	0.00345799	0.00494447	0.0038303	0.00383004	0.00354041	0.00279322	0.00330388	0.00289785	0.003282	0.00517217	0.0043487	0.00457057	0.00337218	0.00317619	0.00475355	0.00278572	0.00420297	0.00398891	0.00297992	0.00271333	0.00413174
ko00061	ko00061: Fatty acid biosynthesis	0.00702701	0.00825231	0.0174826	0.00819484	0.0153737	0.014799	0.00931705	0.00929668	0.00629745	0.00903497	0.00807585	0.007574	0.00919867	0.0106672	0.0183668	0.00794075	0.00998217	0.014184	0.0103645	0.00591425	0.00989154	0.00657395	0.013201	0.0112699	0.00606871	0.00881417	0.0117274	0.0114215	0.0147954	0.0110421	0.0129367	0.00945456	0.0166501	0.0100429	0.00867825	0.0143957	0.0200931	0.0106545	0.0174189	0.010095	0.00943959	0.00548028	0.00868068	0.0075717	0.00883793	0.00794087	0.0080746	0.00913834
ko00660	ko00660: C5-Branched dibasic acid metabolism	0.0272687	0.0230076	0.0215248	0.0262128	0.0139704	0.0177576	0.0231029	0.0247619	0.022692	0.0171295	0.0171882	0.0200784	0.0143776	0.020038	0.0181536	0.0248177	0.0367124	0.023061	0.0174147	0.0150981	0.0185291	0.0186985	0.0199694	0.0170971	0.0215873	0.023067	0.0188538	0.0188741	0.021636	0.0199641	0.0187872	0.0228318	0.0163734	0.0181871	0.0198716	0.0165789	0.0204502	0.0229091	0.0216285	0.0198793	0.021401	0.0210247	0.022484	0.019247	0.0245161	0.0231211	0.02575	0.021184
ko00561	ko00561: Glycerolipid metabolism	0.0057463	0.00485048	0.00613036	0.00601948	0.00645019	0.0051053	0.00626588	0.00568829	0.00475581	0.00623327	0.00511919	0.00468043	0.00518947	0.00682559	0.00351161	0.00487768	0.00368994	0.00301536	0.00593492	0.0050879	0.00689124	0.00496234	0.0074766	0.00631256	0.00537036	0.00643079	0.00840757	0.00737026	0.00705781	0.00609787	0.00660707	0.00677007	0.0068716	0.00554922	0.0064408	0.00557834	0.00432063	0.00669084	0.00427761	0.00615384	0.00692031	0.00482659	0.00616829	0.00545682	0.00494913	0.00457424	0.00491966	0.00575036
ko01040	ko01040: Biosynthesis of unsaturated fatty acids	0.00194631	0.00234475	0.00340984	0.0022488	0.0023601	0.003641	0.00198205	0.00232935	0.00265681	0.00221681	0.00341268	0.00298028	0.00349413	0.00273406	0.00659066	0.00189207	0.000932563	0.00514905	0.00285411	0.00365405	0.00229165	0.00257249	0.00273346	0.00388192	0.00212517	0.00194046	0.00294075	0.00303328	0.00200148	0.00293952	0.00280092	0.00180535	0.00242522	0.00263737	0.00224609	0.00332834	0.00604056	0.00167869	0.00527852	0.00211332	0.00263466	0.00307298	0.0018353	0.0033884	0.0032957	0.00220633	0.00170487	0.00266805
ko00627	ko00627: Aminobenzoate degradation	0.0017748	0.00207384	0.00263085	0.00266007	0.00267858	0.00247671	0.00324465	0.00206229	0.00268062	0.00239063	0.00293168	0.00275418	0.00276222	0.00212054	0.00183322	0.00348198	0.00325677	0.00136141	0.00295572	0.00238919	0.00266676	0.00271769	0.00286714	0.00208547	0.00323737	0.00270637	0.00291371	0.00267431	0.00361963	0.00264031	0.00278284	0.00279311	0.00220271	0.00285357	0.00280674	0.00236167	0.00134841	0.00292618	0.00169469	0.00377706	0.00308983	0.00275786	0.00285491	0.00229059	0.00215705	0.00302315	0.00315264	0.00282043
ko00624	ko00624: Polycyclic aromatic hydrocarbon degradation	0.00173811	0	0.00241591	0.00269145	0.00225976	0.00183414	0.00220494	0.00158003	0.00230379	0.00197406	0.00207916	0.00215863	0.00195559	0.00246141	0.00100437	0.0020288	0.00154031	0.00119731	0.00228316	0.00203468	0.00240034	0.00209915	0.0025144	0.00208096	0.00210998	0.00255749	0.00313484	0.00273786	0.00276947	0.00220361	0.00229347	0	0.00211956	0.00184489	0.00226098	0.00195583	0.00121432	0.0022013	0.00199558	0.00229198	0.00238169	0.00215948	0.00231839	0.00189284	0.00163932	0.00160672	0.00167865	0.00209177
ko02030	ko02030: Bacterial chemotaxis	0.00314066	0.0044083	0.00334843	0	0.00346195	0.00367089	0.00337798	0.00302737	0.00193452	0.00341108	0.0030748	0.00168763	0.00225133	0.00533032	0.00144189	0.00135517	0.00127611	0.00427783	0.00288597	0.000134819	0.00384348	0.0018443	0	0.00405108	3.17286e-05	0	0.00258531	0.00448502	0.00266693	0.00285122	0.00268444	0.00290353	0.00298025	0.00224239	0.00342015	0.00307241	0.00530796	0.00248442	0.00159754	0	0.00334464	9.60298e-06	0.00392236	0.00248943	0.00270393	0.00164952	0.00148643	0.0024145
ko00130	ko00130: Ubiquinone and other terpenoid-quinone biosynthesis	0.00828521	0.00689444	0.00553587	0.00913809	0.00470751	0.00683486	0.00871204	0.00770449	0.0096419	0.0100231	0.00823835	0.00914882	0.00785323	0.00931486	0.00817561	0.0095222	0.00743167	0.00807252	0.00718293	0.00775933	0.00920047	0.0103523	0.00747572	0.00720763	0.00842997	0.00632374	0.00622434	0.00825069	0.00759589	0.00811889	0.00608803	0.00848521	0.0046974	0.00702577	0.00814083	0.00580233	0.00697545	0.00717249	0.00773012	0.00776777	0.00906797	0.00752494	0.010501	0.00785002	0.00589152	0.0101618	0.00929088	0.00691442
ko00562	ko00562: Inositol phosphate metabolism	0.00549698	0.00532088	0.00356489	0.00550586	0.00412679	0.00443597	0.00546779	0.00558278	0.00466222	0.00673688	0.00605976	0.00448761	0.00573939	0.00669471	0.00276827	0.00436223	0.00339794	0.00240861	0.00466485	0.00617827	0.00570397	0.00499315	0.00565316	0.00650097	0.0044518	0.00468404	0.0048479	0.00554727	0.00491681	0.00517103	0.00451664	0.00598984	0.00474021	0.00476717	0.00573117	0.00401249	0.00265545	0.00451514	0.00312344	0.00482508	0.00513326	0.00467567	0.00648459	0.00518445	0.00544254	0.00477727	0.00395568	0.00566423
ko00362	ko00362: Benzoate degradation	0.000906964	0.00144148	0.0018525	0.0014791	0.00164505	0.00159077	0.00199859	0.000936425	0.00159712	0.000962767	0.00128495	0.000984789	0.00159548	0.00132219	0.00153783	0.00159065	0.00124528	0.0012496	0.0020501	0.00161311	0.0013227	0.00136268	0.00149495	0.00160554	0.0011662	0.00161775	0.00246931	0.00229848	0.00301788	0.0017664	0.00270845	0.00188023	0.0017766	0.00157889	0.00120125	0.00142791	0.00177768	0.00206317	0.00159228	0.00190351	0.0016043	0.00198734	0.00137508	0.00124304	0.00149761	0.00136011	0.00163486	0.00173057
ko00440	ko00440: Phosphonate and phosphinate metabolism	0.00137633	0.00200592	0.00277311	0.000923698	0.00215359	0.00315625	0.00224208	0.00223431	0.00363185	0.0022963	0.00152489	0.00318323	0.00175468	0.00114354	0.00289714	0.00206871	0.00226877	0.0033703	0.00239815	0.0013012	0.00203806	0.00231454	0.00232163	0.00192923	0.0026522	0.00239954	0.00194867	0.00133489	0.00137303	0.0022627	0.002002	0.00187837	0.00204442	0.0022923	0.00213039	0.00248363	0.00377245	0.00144902	0.00337313	0.00185971	0.00290142	0.00221755	0.00134117	0.00209081	0.00264374	0.0018572	0.0025001	0.00124645
ko00780	ko00780: Biotin metabolism	0.0254016	0.0230395	0.016616	0.0212378	0.0129292	0.0224788	0.0227691	0.0208552	0.023185	0.0259369	0.0212649	0.0222798	0.0196894	0.0202889	0.0214934	0.0190098	0.0203671	0.0190241	0.018646	0.0196603	0.0223331	0.0225404	0.025029	0.0230358	0.0217403	0.0204789	0.024825	0.0229168	0.0209579	0.0221245	0.0180608	0.024663	0.0149133	0.0200284	0.0240432	0.0177079	0.0218732	0.0224258	0.0222358	0.0193553	0.0237905	0.0194673	0.0234966	0.0206946	0.0153272	0.0197768	0.0171519	0.0164109
ko00791	ko00791: Atrazine degradation	0.0012837	0.000801459	0.000850524	0.000643528	0.00179037	0.000604449	0.000422508	0.000746149	0.00148689	0.0018823	0.000999113	0.00154182	0.00114821	0.00117125	0.00164363	0.00132462	0.000456607	0.00386607	0.00142155	0.000761817	0.00156357	0.00204735	0.000504317	0.000847443	0.00151901	0.000861811	0.000472793	0.000474526	0.000676886	0.00100223	0.00145778	0.0009416	0.000774637	0.00145759	0.000684005	0.00152167	0.000431067	0.000947789	0.000863829	0.00133743	0.00121491	0.000803447	0.00179438	0.000907708	0.000733414	0.00148217	0.00111771	0.000779118
ko00052	ko00052: Galactose metabolism	0.009295	0.00751863	0.00969552	0.008996	0.0117688	0.00739309	0.0109314	0.00835946	0.00712522	0.00816163	0.00787905	0.00613405	0.00724983	0.0090479	0.00496932	0.00706684	0.00696723	0.00569598	0.00955582	0.00632324	0.00984242	0.00650389	0.0102822	0.00835605	0.00705864	0.00903195	0.00841843	0.0101477	0.010516	0.00873043	0.0112464	0.0107262	0.0133795	0.00808981	0.0101028	0.00931659	0.00489892	0.0100858	0.00468141	0.0110456	0.0092623	0.0067595	0.00829547	0.0067518	0.00749665	0.00683297	0.00692444	0.00844752
ko00626	ko00626: Naphthalene degradation	0	0.00405509	0.00535116	0	0.00543593	0	0	0	0.00497355	0.00452046	0.00427966	0.00389003	0.00416721	0.00412688	0.00474466	0	0	0	0.00467371	0.00378845	0.00505737	0.00345291	0	0.00477577	0.00494787	0	0.00797382	0.00602442	0	0.00593295	0.0053621	0	0	0.00421576	0	0.00482294	0	0	0.00497941	0.004764	0.00563224	0.00397057	0.00448805	0.00415086	0.00427908	0.00306803	0	0.00474532
ko03008	ko03008: Ribosome biogenesis in eukaryotes	0.00141143	0.00147595	0.00114689	0.00141125	0.00133189	0.00142658	0.00159669	0.00176014	0.00142147	0.0020476	0.00270067	0.00169152	0.00342926	0.00134026	0.00129978	0.00157577	0.00205579	0.00187712	0.00125686	0.00396375	0.00131811	0.00192427	0.000977839	0.00238833	0.00185096	0.00173385	0.000979636	0.00169377	0.000982539	0.00153208	0.00124945	0.00129139	0.00178134	0.00190554	0.00130999	0.00138933	0.00149232	0.0014753	0.00123149	0.00202583	0.0012925	0.00222321	0.00169426	0.00268077	0.00290199	0.00171424	0.00182914	0.0033381
ko00903	ko00903: Limonene and pinene degradation	0.00229354	0.00296739	0.00406308	0.00448685	0.00281838	0.00453298	0.00492634	0.00262694	0.00437365	0.00275375	0.00379594	0.00434791	0.00346447	0.00286148	0.00545735	0.00323071	0.00293913	0.00513419	0.00398419	0.00346351	0.003391	0.00367497	0.00392324	0.00387232	0.0039864	0.00448647	0.00507256	0.00390318	0.00641201	0.00404741	0.00389288	0.0043365	0.00287779	0.00355376	0.003591	0.00346621	0.00573213	0.0043332	0.00435937	0.00362143	0.00433114	0.00468544	0.00330023	0.00344983	0.00340546	0.00365987	0.00340651	0.00341011
ko00360	ko00360: Phenylalanine metabolism	0.00192842	0.00294208	0.00206852	0.00231678	0.00209361	0.00273378	0.00198459	0.00229781	0.00306533	0.00357113	0.00275517	0.00257428	0.00294377	0.0033347	0.00366824	0.00203406	0.00172988	0.00303405	0.0027711	0.00280603	0.00264835	0.00260758	0.00248117	0.00275949	0.00234862	0.00220643	0.00229525	0.00302222	0.00229476	0.00240015	0.00323376	0.0022491	0.00222119	0.00260499	0.00223799	0.0020512	0.00258938	0.00226636	0.00305584	0.00274094	0.00253599	0.00318823	0.00275145	0.00261304	0.00222952	0.00259573	0.00196039	0.0022356
ko00460	ko00460: Cyanoamino acid metabolism	0.00459546	0.00497291	0.00539018	0.00472891	0.00554167	0.00418547	0.00395585	0.00400581	0.00343804	0	0.00416089	0.00371876	0.0044223	0	0.0046518	0.00392525	0	0.0044613	0.00495363	0.00423385	0.00515377	0.0041154	0	0.00512901	0.00384994	0.00398605	0.00457348	0	0	0.00442982	0.0047962	0.00510115	0	0.00449337	0.00420282	0	0	0	0	0	0.00481535	0.0029232	0.00533819	0.00398106	0.00372816	0.00410623	0	0.00443637
ko00410	ko00410: beta-Alanine metabolism	0.00206687	0.00351439	0.00391384	0.00161325	0.0028723	0.00485297	0	0.00211585	0.00445737	0.0028391	0.00337092	0.00494574	0.00431942	0.0017399	0.00652585	0.00399511	0.00351397	0.00592687	0.00366162	0.00445377	0.00299769	0.00425007	0.00378539	0.00379638	0.00423659	0.00539738	0.0052422	0.00318002	0.00413456	0.00412681	0.00423413	0.00323964	0.00312686	0.00360164	0.00255667	0.00407999	0.00697163	0.00411193	0.00670052	0.0027026	0.00269109	0.00469566	0.00284866	0.00368616	0.0038697	0.00376355	0.00461998	0.00381125
ko00340	ko00340: Histidine metabolism	0.0196084	0.0187318	0.012661	0.0194591	0.0126732	0.0202304	0.0188591	0.0176512	0.0195972	0.0155539	0.0159932	0.0186008	0.0150739	0.019325	0.0208596	0.0177722	0.017981	0.0202072	0.016574	0.0163352	0.0176348	0.0184171	0.0145595	0.015693	0.0182888	0.0185895	0.0172767	0.018747	0.0174195	0.0179119	0.0155471	0.0201997	0.011438	0.0147784	0.0182618	0.0159636	0.0210025	0.01662	0.0179697	0.0173729	0.0163386	0.0163286	0.0174736	0.0172987	0.0157449	0.0172283	0.0150116	0.0127381
ko00785	ko00785: Lipoic acid metabolism	0.0272747	0.0254399	0.0144988	0.0178626	0.0280104	0.0268422	0.0290415	0.0237418	0.0261893	0.0171485	0.0236055	0.0282379	0.0225539	0.023841	0.0201238	0.0289645	0.0359325	0.0332736	0.0235457	0.0220298	0.0250204	0.0297405	0.0190759	0.0175844	0.028493	0.0213083	0.0175741	0.018214	0.0208066	0.0227774	0.0206526	0.0245344	0.0243701	0.0253613	0.0239872	0.0241238	0.0220583	0.0161918	0.016016	0.0210989	0.022737	0.0250484	0.0268532	0.0275105	0.0186576	0.0290073	0.0342565	0.021565
ko00473	ko00473: D-Alanine metabolism	0.0203221	0.0203698	0.0217531	0.0198082	0.0160292	0.0186779	0.0218001	0.021353	0.0167149	0.016396	0.0160339	0.0142831	0.013908	0.0176307	0.0119897	0.0177667	0.021337	0.0139807	0.0183167	0.010829	0.0177309	0.0136403	0.0204313	0.0169151	0.0169199	0.0178213	0.0219509	0.0213364	0.0233312	0.0176816	0.0187466	0.0207917	0.0175118	0.0170718	0.0184332	0.0166634	0.0201858	0.0243202	0.0173797	0.0182404	0.0191484	0.0149089	0.0193254	0.0153884	0.0173331	0.0159453	0.0152068	0.0164661
ko00860	ko00860: Porphyrin and chlorophyll metabolism	0.0102314	0.00990768	0.00564291	0.0116905	0.00493258	0.00886923	0.00942082	0.0106381	0.00939403	0.0111491	0.0102537	0.00807351	0.00849629	0.0157945	0.0066064	0.00590296	0.00443522	0.00589123	0.00866255	0.00946143	0.0111435	0.00928026	0.0109835	0.0112517	0.00700269	0.00754692	0.00807536	0.0121143	0.0085814	0.00880884	0.00790992	0.0100919	0.00540743	0.00721008	0.0103764	0.00555839	0.00753687	0.00863332	0.00769014	0.00729963	0.0116865	0.00823099	0.0130802	0.00907172	0.00603034	0.00701303	0.00521441	0.0075148
ko00625	ko00625: Chloroalkane and chloroalkene degradation	0	0	0.00454664	0	0.00606514	0	0	0	0.00386357	0	0	0.00326358	0.00376958	0.00256968	0.00390668	0	0.00298724	0	0.00404128	0.00333366	0.00377912	0.00254427	0	0.00384051	0.00411503	0	0	0.00466053	0	0.00489929	0.00506981	0	0.00826193	0.00339901	0.00354143	0.0047663	0	0.00497317	0.00406604	0	0.00445302	0	0.00234255	0.00341889	0.00344188	0.00202173	0.0025819	0.00370703
ko05120	ko05120: Epithelial cell signaling in Helicobacter pylori infection	0.000154538	0.000150297	0.000736071	0.000169411	0.000346837	0.000429862	0.000335651	0.000296562	6.41141e-05	0.000239897	8.68215e-05	0.000103831	7.19815e-05	0.000151124	0.00052932	0.000247815	0.000358949	0.000596645	0.000104651	2.92064e-05	0.000126078	1.91392e-05	0.000365314	0.000320028	0.000152045	0.000379953	0.000558394	0.000409641	0.000746992	0.000905867	0.000147688	0.000287285	0.000352247	0.000703316	0.000245787	0.000342745	0.000530411	0.000733122	0.000612907	0.000109125	0.000357366	4.85511e-05	8.2922e-05	0.000133118	0.000315171	0.000167589	0.000235559	0.000272036
ko03013	ko03013: RNA transport	0.000196826	0.000428621	0.000632118	0.000433523	0.000849972	0.000414746	0.000506898	0.000424987	0.000178032	0.00122282	0.00193279	0.000591806	0.00318261	0.000264566	0.000331228	0.000324026	0.000509315	0.000280884	0.000333753	0.00509733	0.000298778	0.00103725	0.000395737	0.00155507	0.000599887	0.00071882	0.00090495	0.000836996	0.000856428	0.000846839	0.000626318	0.000295989	0.000714474	0.000942946	0.000167021	0.000574715	0.000667082	0.000421974	0.000444138	0.000684992	0.000375516	0.00129285	0.000244774	0.00178756	0.00170752	0.000416846	0.000374093	0.00281673
ko00053	ko00053: Ascorbate and aldarate metabolism	0.00398905	0.00371377	0.00298951	0.0061362	0.00517173	0.0043369	0.00542329	0.00485623	0.00396832	0.00448306	0.00573332	0.00659839	0.00411312	0.00516655	0.00294416	0.00296282	0.001252	0.00220567	0.00674011	0.00341843	0.00533024	0.00516021	0.00461107	0.00440862	0.00380185	0.00369763	0.00387462	0.00557239	0.00559277	0.00405616	0.00353474	0.00429834	0.00549994	0.00496469	0.00451665	0.00422653	0.00300574	0.00405859	0.00242879	0.00472599	0.00481377	0.00520895	0.00434335	0.00494878	0.00367547	0.0029508	0.0030711	0.00318288
ko00590	ko00590: Arachidonic acid metabolism	0.00117412	0.00046211	0.000798615	0	0.001089	0.000834492	0.00127391	0.000613767	0.000342905	0.00134791	0.00112552	0.000415658	0.00120447	0.000401348	0.00133581	0.00159044	0.00143797	0	0.000891517	0.00159446	0.000874948	0.00053099	0.00103111	0.000732185	0.00132683	0.00159456	0	0.00140776	0.00220611	0.0011433	0.00101268	0.00207793	0.00110715	0.000672372	0.00074872	0.0012129	0.000668102	0.00176977	0.0012384	0	0.000974167	0.000630152	0.00104307	0.00101318	0.0013329	0.00122216	0.00173407	0.00178925
ko04146	ko04146: Peroxisome	0.00166589	0.00100797	0.000913652	0.00143874	0.00122525	0.000852813	0.00132584	0.00101821	0.00130072	0.00216281	0.00218145	0.00152181	0.00354952	0.000985357	0.00102115	0.00153025	0.000828144	0.00104131	0.00117249	0.00756619	0.000939799	0.00195504	0.000916907	0.00197521	0.001628	0.00115523	0.00110731	0.00137066	0.000834807	0.00113834	0.00114644	0.000911265	0.00101041	0.00145221	0.000835305	0.00113016	0.00132608	0.00108897	0.000802817	0.00160676	0.00106583	0.00269938	0.00084128	0.00245003	0.00253873	0.00135883	0.001049	0.00293256
ko00511	ko00511: Other glycan degradation	0.00979683	0.0107498	0.00939278	0.0108587	0.0106316	0.00651892	0.0106323	0.0100799	0.00456755	0.0120615	0.00909804	0.00222693	0.00692635	0.0161941	0.00327808	0.00286273	0.00177222	0.00262003	0.00927872	0.00560403	0.0121983	0.00498386	0.0112891	0.012462	0.00242453	0.00784516	0.00809224	0.0133477	0.00731363	0.00747337	0.0106967	0.0109364	0.0111177	0.00615823	0.0119281	0.00791834	0.00347197	0.00709217	0.00353414	0.00596321	0.0100069	0.00273767	0.0134204	0.00665585	0.00547615	0.0035583	0.00470442	0.00784182
ko00040	ko00040: Pentose and glucuronate interconversions	0.00795597	0.00694543	0.00484509	0.00922813	0.00465957	0.00612423	0.00735142	0.00735071	0.00496205	0.00725263	0.0070966	0.00521338	0.00563568	0.0104953	0.00447568	0.00505073	0.00483144	0.00421093	0.00730697	0.00595615	0.00748732	0.00524645	0.00873979	0.00836911	0.00490858	0.00685771	0.00872938	0.00965585	0.00742502	0.00714706	0.00618875	0.00838982	0.00597241	0.00526985	0.00808377	0.00467455	0.00592884	0.0071443	0.00414046	0.0063692	0.00857787	0.00596795	0.00857901	0.0069231	0.00679041	0.00460254	0.00529092	0.00594904
ko00540	ko00540: Lipopolysaccharide biosynthesis	0.00186066	0.00145995	0.00597062	0.00176114	0.000801419	0.00660994	0.000573586	0.00204359	0.0011517	0.00219535	0.00136439	0.00296482	0.00163544	0.00158126	0.011867	0.00583925	0.00780997	0.0103459	0.000836943	0.00123903	0.00107757	0.0013102	0.00214559	0.00300219	0.00140552	0.00209215	0.00102831	0.00194569	0.0054353	0.00202093	0.000581033	0.000748914	0.00338504	0.00325953	0.00105981	0.0042746	0.010936	0.00171363	0.0156991	0.00150456	0.00150717	0.00141418	0.00123342	0.00205541	0.00409523	0.00362194	0.00592393	0.00223618
ko00510	ko00510: N-Glycan biosynthesis	0.000744272	0.00100295	0.000448999	0.00113158	0.000741357	0.00046377	0.000605683	0.000839266	0.000964076	0.00168448	0.00275608	0.00129147	0.0033925	0.000807635	0.000322003	0.000746539	0.00111332	0.000366585	0.000802862	0.0059201	0.000775441	0.00205625	0.000863578	0.00209938	0.00132823	0.00176182	0.000551616	0.000900846	0.000266245	0.0010486	0.000751895	0.000702156	0.000653716	0.00140223	0.000749993	0.000592801	0.000104209	0.000710132	0.000709453	0.00100155	0.000715959	0.00207607	0.000814816	0.00210583	0.00163174	0.000985039	0.00130515	0.00249244
ko00600	ko00600: Sphingolipid metabolism	0.00180127	0.00217826	0.00161276	0.00189457	0.0018728	0.00117845	0.00153966	0.00177595	0.00102311	0.00222674	0.00259418	0.000893272	0.00282988	0.00232067	0.000169217	0.000732524	0.000804361	0.000169119	0.00152944	0.00322326	0.0019753	0.00159666	0.00218969	0.00263009	0.000597417	0.00181527	0.00155255	0.00253063	0.000236205	0.00150116	0.00189608	0.0020694	0.00158083	0.00147306	0.00196648	0.00146691	0.000101908	0.00133097	0.000271046	0.00146567	0.00168396	0.00147585	0.00213965	0.00201083	0.00174751	0.00114362	0.00121697	0.00264786
ko02060	ko02060: Phosphotransferase system (PTS)	0.0127105	0.0123642	0.0100624	0.0149186	0.0158749	0.0101621	0.0167228	0.0136815	0.00886762	0.0125895	0.0115487	0.0107493	0.0102361	0.0172552	0.00503388	0.00804363	0.00651465	0.00462753	0.013914	0.00785585	0.0149272	0.0108038	0.0153248	0.0134483	0.00868048	0.0107296	0.0143083	0.0159094	0.0163366	0.0119468	0.0137877	0.0153077	0.0163389	0.0117211	0.0144518	0.0118246	0.00469974	0.0130091	0.00436371	0.0127851	0.0136712	0.00918172	0.0133913	0.0102261	0.00893135	0.00782958	0.00751246	0.00914725
ko00633	ko00633: Nitrotoluene degradation	0.000754513	0.000489941	0.00081362	0.000207157	0.000376456	0.00137732	0.000421008	0.000497867	0.000971011	0.0002696	0.000520474	0.0010271	0.000645656	0.000527377	0.00218411	0.0035477	0.00416469	0.00122867	0.000697655	0.000601501	0.000505279	0.000793789	0.000874467	0.000562409	0.000706231	0.000687953	0.000227017	0.000585267	0.000144007	0.000642047	0.000406299	0.000394466	0.000353842	0.000759033	0.000520184	0.00174489	0.00190629	0.000398567	0.0026402	0.000775372	0.000468529	0.000871718	0.000720362	0.000881368	0.000811736	0.00368314	0.0047093	0.000534276
ko00311	ko00311: Penicillin and cephalosporin biosynthesis	0.000614282	0.000635815	0.00127288	0.00104659	0.000104537	0.000570497	0.000635144	0.00112732	0.000285565	0.000522861	0.000743407	0.000106855	0.000465515	0.00148241	0.000204859	0.000289833	7.07568e-05	0.000202217	0.000491758	0.000584606	0.000822093	0.000339822	0.000882498	0.000940236	0.000141911	0.000867344	0.000569549	0.000864593	0.000871877	0.000371817	0.000487177	0.00109172	0.000551533	0.000444846	0.000803566	0.000229619	0.000161515	0.000600882	0.000273295	0.000251984	0.000696582	0.000189818	0.000925018	0.000310267	0.000508148	0.000115735	0.000275705	0.000809655
ko04512	ko04512: ECM-receptor interaction	1.21491e-05	8.66823e-05	4.27718e-05	0.00010613	8.3831e-05	4.02843e-05	3.35459e-05	0	0.000113808	3.5781e-05	8.39204e-05	3.94868e-05	5.37698e-05	7.32119e-05	3.16633e-05	5.95902e-05	6.16379e-05	0	2.8134e-05	0.000128584	5.39742e-05	3.56185e-05	0.000146689	0.00010219	2.0467e-05	7.90574e-05	2.90464e-05	5.89806e-05	5.23977e-05	3.78835e-05	5.94242e-05	1.46755e-05	0	4.86408e-05	1.33564e-05	2.48965e-05	1.07988e-05	2.86418e-05	4.61607e-05	1.48034e-05	3.32223e-05	0	8.12289e-05	3.83298e-05	1.90171e-05	8.8312e-05	8.51928e-05	5.56429e-05
ko04614	ko04614: Renin-angiotensin system	0	7.24063e-05	4.26152e-05	5.46555e-05	7.63857e-05	5.81794e-05	9.89482e-05	6.44713e-05	8.53579e-05	0.000188747	8.47494e-05	0.000120587	0.000210386	0.00012643	5.52834e-05	0.000149924	0.000155225	0	8.49376e-05	0.000156375	0.000123757	0.000158128	4.31688e-05	5.30671e-05	0.000209551	8.85401e-05	2.4952e-05	1.55062e-05	5.04811e-05	6.28183e-05	5.35338e-05	0.000122507	6.47938e-05	0.000121075	0.000100662	0.000100028	0	9.25473e-05	9.23022e-05	0.000181404	0.000111193	6.62663e-05	0.000119309	0.000108186	0.00011141	0.000266631	0.000173174	0.000142363
ko04141	ko04141: Protein processing in endoplasmic reticulum	0.000100165	0.00043592	0.00022099	0.000178315	0.000183516	0.000251942	6.9695e-05	0.000238393	0.00010222	0.00056921	0.00096845	0.000364484	0.0015554	0.000158464	0.000439675	0.000239926	0.000282953	0.000331192	5.49603e-05	0.00405637	8.80329e-05	0.000498487	0.000364112	0.000871268	0.000301908	0.000363367	0.000477353	0.000476712	0.000258993	0.000388825	0.000137256	7.48251e-05	6.7772e-05	0.000365196	3.40566e-05	0.000170423	0.000355698	0.000128867	0.000325603	0.000315347	0.000120684	0.000779113	0.000135199	0.00102534	0.000984398	0.000289311	0.000257243	0.00153837
ko04910	ko04910: Insulin signaling pathway	1.13379e-05	0.000104772	3.35708e-05	0.000122125	1.26503e-05	5.43808e-06	1.09002e-05	7.30928e-06	9.13425e-06	6.07228e-05	2.48296e-05	9.41245e-06	2.50418e-05	1.4061e-05	1.87605e-05	2.39268e-05	4.69297e-05	1.17653e-05	7.99635e-06	2.40524e-05	9.46866e-06	7.01893e-06	5.91912e-05	2.40439e-05	9.84602e-06	2.29281e-05	7.28993e-05	8.8974e-06	3.29944e-05	1.39517e-05	6.05215e-06	3.054e-05	8.46723e-07	2.39235e-05	2.3286e-05	2.27328e-05	2.95358e-05	1.59807e-05	3.98332e-05	2.07262e-05	4.68108e-06	1.68614e-05	1.37854e-05	2.35925e-05	2.43505e-05	2.82103e-05	2.31976e-05	3.37514e-05
ko00281	ko00281: Geraniol degradation	0.00171412	0.00335166	0.00413374	0.0031949	0.00223024	0.0051983	0.00257595	0.00277042	0.00268853	0.00286904	0.00269137	0.00295466	0.00325424	0.00344361	0.00839062	0.00184267	0.00172604	0.00772132	0.00273708	0.00330392	0.00230874	0.00251069	0.00234324	0.00412527	0.00178995	0.00239414	0.00267493	0.0037094	0.00356622	0.0027972	0.00331708	0.00221998	0.00288691	0.00245944	0.00249731	0.00385717	0.00854652	0.00199181	0.00647114	0.00211995	0.00197383	0.0030708	0.00225052	0.00364521	0.00423312	0.0021012	0.00199205	0.00242345
ko01053	ko01053: Biosynthesis of siderophore group nonribosomal peptides	0.000147232	0.000486929	0.00113669	0.000165294	0.000220987	0.000679337	0.000518184	0.000324211	0.00268586	0.00038903	0.00122815	0.00165475	0.00029949	0.000185224	0.00163703	0.00206955	0.000991891	0.000860793	0.000916322	0.000712485	0.000447085	0.000281273	0.000415918	0.000427625	0.00140228	0.000271709	0.000497256	0.00105597	0.000608502	0.000350726	0.00133669	0.000361549	0.000107186	0.000624033	0.000163663	0.00144728	0.000524763	0.000683191	0.000723802	0.00101754	0.000150393	0.00207968	0.00323788	0.000254189	0.000451071	0.00227272	0.00194402	0.000479932
ko04060	ko04060: Cytokine-cytokine receptor interaction	0	6.44002e-06	2.09225e-06	4.61273e-05	2.31899e-06	2.43529e-08	0	0	7.96862e-06	2.25779e-06	2.0278e-06	5.16817e-06	1.05422e-05	4.13655e-06	0	1.87866e-06	2.41523e-05	0	9.35372e-06	0	3.75124e-06	2.72663e-06	0	1.17712e-05	1.15228e-05	8.03697e-07	1.23109e-05	1.95173e-06	2.31234e-05	2.52398e-06	3.68749e-06	0	0	5.7847e-06	4.55923e-06	2.36344e-06	1.25613e-05	0	5.85559e-06	4.85863e-06	1.69659e-05	2.11004e-10	6.00199e-07	4.91802e-06	1.41273e-06	1.02734e-05	7.01735e-06	8.3269e-06
ko02040	ko02040: Flagellar assembly	0.000234824	0.000237268	0.000361132	0.000375856	0.000311946	0.000576561	8.99873e-05	0.000427076	0.000221844	0.000490896	0.000502589	0.00011327	0.000622562	0.000539836	0.000901782	0.00060294	0.00122582	0.000521865	0.000398615	0.000264498	0.000654134	0.00013744	0.00064405	0.000500986	0.00036315	0.000286236	0.000524529	0.00053409	0.000489137	0.000632611	0.000280746	0.000337813	0.000825861	0.000472807	0.000632124	0.000236237	0.000178776	0.000875336	0.000837823	0.000218017	0.00091456	0.000397743	0.000839858	0.000228817	0.00021365	0.000720859	0.00085172	0.000399328
ko04080	ko04080: Neuroactive ligand-receptor interaction	1.0222e-05	8.6865e-05	1.52007e-05	4.8479e-05	2.40294e-05	1.09878e-05	2.86982e-05	2.49717e-05	2.605e-05	4.0319e-05	4.36758e-05	2.86735e-05	8.76465e-05	1.87761e-05	8.08573e-06	3.26109e-05	4.71564e-05	6.57633e-06	1.22198e-05	0.000104527	1.88584e-05	4.04184e-05	7.41686e-05	6.97161e-05	3.2309e-05	2.7078e-05	3.44588e-05	4.1087e-05	1.71532e-05	2.45246e-05	1.38528e-05	7.42159e-06	1.47464e-05	4.30692e-05	9.14014e-06	1.75955e-05	3.99164e-05	2.51107e-05	3.15005e-05	1.30868e-05	1.46058e-05	5.81012e-05	1.77667e-05	3.50118e-05	3.3214e-05	5.982e-05	6.59638e-05	5.62465e-05
ko04514	ko04514: Cell adhesion molecules (CAMs)	2.69494e-05	3.42657e-05	1.26557e-05	4.93062e-05	1.36054e-05	2.41103e-05	1.14303e-06	5.73125e-05	5.20244e-06	2.50694e-05	1.3667e-05	7.24729e-06	2.5249e-05	4.81519e-05	5.93632e-06	2.19e-05	1.2935e-05	1.22544e-06	1.04262e-05	3.80165e-05	1.57623e-05	1.7022e-05	4.63546e-05	2.54868e-05	8.027e-06	5.46354e-05	9.98608e-06	3.73374e-05	2.99058e-05	6.89262e-05	4.18315e-06	1.27044e-05	0	2.34813e-05	1.76815e-05	9.32007e-06	1.6101e-05	2.86993e-06	9.02501e-06	1.21903e-07	1.61092e-05	0	2.35581e-05	8.57575e-06	1.31638e-05	3.0636e-05	2.78211e-05	2.07326e-05
ko05150	ko05150: Staphylococcus aureus infection	0.000276842	9.4389e-05	0.00133681	0.000198176	0.000527764	0.000575515	0.00176365	0.000483263	0.000175413	0.000171849	0.000263245	7.50682e-05	0.000252328	0.000160884	0.000139038	0.000360757	0.000745341	3.53339e-05	0.000347056	0.000116822	0.00035461	6.92107e-05	0.00105739	0.000481133	0.000393874	0.00106323	0.00272139	0.000730192	0.00366428	0.000756768	0.000531807	0.00128987	0.00048882	0.000363078	0.000495945	0.000370388	0.000624171	0.00250662	0.000193317	0.000756284	0.000745032	0.000221342	0.00014123	0.000165788	0.000353431	0.000200373	0.000250094	0.00083607
ko00830	ko00830: Retinol metabolism	0	1.33585e-05	1.00005e-05	0	2.0849e-05	1.12642e-05	0	3.07842e-06	1.17819e-06	0	2.03198e-05	1.28862e-05	9.88087e-05	4.49229e-05	2.33162e-05	2.7721e-06	6.98894e-05	1.8393e-06	9.33757e-06	9.47579e-05	3.88694e-06	3.27175e-05	0.000115678	4.99732e-05	1.31219e-05	3.54539e-05	9.77899e-07	8.71443e-08	5.61968e-06	1.65702e-05	9.82492e-06	1.08947e-05	2.86692e-05	3.71949e-05	3.41526e-06	8.6753e-06	2.72019e-06	2.47922e-05	4.53087e-05	0	1.85295e-06	1.45999e-05	1.23433e-05	7.91908e-06	1.84484e-05	2.84806e-06	3.33079e-06	5.23034e-05
ko04974	ko04974: Protein digestion and absorption	4.49725e-05	6.15133e-05	0.000112858	2.69368e-05	4.53151e-05	0.000117535	3.42291e-05	2.41661e-05	7.77998e-05	6.21143e-05	0.000133876	4.94733e-05	8.01646e-05	3.42852e-05	6.87426e-05	8.14453e-05	0.000100059	2.93021e-05	4.08298e-05	9.13783e-05	4.90924e-05	3.36444e-05	9.95731e-05	9.39763e-05	4.12729e-05	0.000187303	4.73877e-05	7.93657e-05	5.64868e-05	3.81633e-05	3.23628e-05	2.67025e-05	8.1054e-05	8.96538e-05	4.96171e-05	3.95291e-05	1.41432e-05	8.15104e-05	0.00021883	6.78353e-05	4.14948e-05	7.78911e-05	3.19657e-05	4.14052e-05	5.85468e-05	6.98725e-05	0.000100303	5.22255e-05
ko00940	ko00940: Phenylpropanoid biosynthesis	2.04329e-06	1.89594e-06	2.2167e-06	1.74076e-06	1.59263e-06	2.97342e-06	5.94372e-06	0	1.53504e-06	1.25202e-06	3.11429e-06	4.39142e-06	5.09824e-06	9.50637e-06	1.77309e-06	4.72516e-07	0	0	8.10052e-06	7.97807e-06	1.12891e-05	7.83552e-06	2.12378e-06	1.62459e-06	1.54386e-06	1.0733e-05	4.14747e-07	5.22305e-06	1.3927e-06	2.28499e-06	2.33307e-06	1.49759e-06	1.29693e-06	1.22683e-05	3.55089e-06	5.92454e-06	1.60572e-06	5.01459e-07	4.13349e-06	1.70864e-05	6.37836e-07	4.64428e-07	4.16219e-06	1.82023e-06	1.21846e-05	9.29995e-07	0	4.69635e-06
ko05111	ko05111: Vibrio cholerae pathogenic cycle	3.20481e-05	0.000174891	4.51593e-05	2.13613e-05	2.0934e-05	8.76686e-05	6.00492e-05	3.92848e-05	1.77039e-05	3.99026e-05	1.60202e-06	2.15941e-05	4.7079e-05	7.09722e-05	3.69521e-05	1.18438e-05	0.000206846	3.28646e-05	4.55831e-05	2.92146e-05	5.21809e-05	3.14151e-05	0.000114901	1.75558e-05	7.3808e-06	7.02412e-05	3.10093e-05	9.16085e-05	9.1749e-05	3.44249e-05	1.85608e-05	4.14806e-05	8.24046e-05	2.91403e-05	5.33851e-05	6.52724e-05	4.38192e-05	4.32201e-05	0.000104454	8.41691e-06	6.42087e-05	2.50499e-05	5.60556e-05	3.11269e-05	7.32238e-05	4.8678e-05	7.13096e-05	5.03075e-05
ko04270	ko04270: Vascular smooth muscle contraction	0	4.10986e-06	2.05222e-06	0	5.90848e-06	2.42277e-06	4.90237e-07	0	5.18452e-06	3.13484e-07	0	1.65826e-05	2.12783e-05	2.12978e-06	2.32882e-07	2.10987e-05	0	0	1.41289e-05	1.02061e-05	1.34668e-05	3.83325e-06	0	2.2457e-05	1.81278e-06	3.17165e-05	6.14296e-06	6.44702e-07	1.10951e-09	1.88487e-06	2.50332e-06	2.54855e-06	1.15224e-05	1.51374e-05	3.068e-08	4.96404e-07	0	3.70748e-06	1.68202e-10	0	2.14049e-07	5.62769e-06	5.31818e-09	6.90852e-06	1.26375e-05	1.95685e-05	2.76716e-06	5.98101e-06
ko04320	ko04320: Dorso-ventral axis formation	4.99297e-05	0.000197781	6.19741e-05	2.25911e-05	5.3479e-05	7.08727e-05	0.000103605	0.00020327	0.00042671	0.00010804	0.000664611	4.6093e-05	5.98715e-05	5.36207e-05	1.58205e-05	0.000195953	0.000224437	3.85433e-05	3.10926e-05	0.000529368	3.35298e-05	4.4293e-05	0.000207459	0.000204304	0.000227749	0.00017281	0.000208525	0.000494963	0.000187725	3.0657e-05	8.69474e-05	4.9222e-05	3.62342e-05	0.000112886	2.26851e-05	5.69824e-05	4.69442e-05	8.4446e-05	3.61474e-05	1.71743e-05	6.99275e-05	7.74746e-05	7.75491e-05	6.53982e-05	0.00025172	0.000120788	0.000260227	0.000257565
ko04630	ko04630: Jak-STAT signaling pathway	1.35702e-05	3.29386e-05	7.4157e-06	9.33122e-07	7.90721e-06	1.31015e-05	1.61888e-06	1.57808e-05	8.25765e-06	1.59026e-05	4.11786e-05	1.71649e-05	3.96008e-05	1.42979e-05	1.16613e-05	1.04174e-05	1.84038e-05	2.6363e-06	7.08102e-06	3.1287e-05	8.62376e-06	1.45925e-05	1.93892e-05	6.76279e-05	1.57613e-05	2.09489e-05	1.71951e-06	1.07712e-05	3.21069e-06	1.79441e-05	2.76233e-06	2.65584e-06	3.27903e-06	1.30733e-05	2.82905e-06	1.47334e-05	6.2251e-05	8.12529e-06	2.53113e-05	4.94428e-06	3.55549e-06	7.03552e-06	8.24975e-06	2.15649e-05	1.29233e-05	9.17467e-06	4.08194e-05	1.52389e-05
ko04610	ko04610: Complement and coagulation cascades	2.79501e-05	3.28076e-05	1.17411e-05	1.92223e-05	3.60284e-05	1.04939e-05	5.24618e-06	2.01725e-06	4.44977e-05	3.72257e-06	2.85452e-05	3.21263e-05	1.87656e-05	2.91455e-06	1.88489e-06	5.88481e-06	5.0496e-05	1.86728e-05	1.02258e-05	1.3659e-05	8.3251e-06	1.05897e-05	7.18352e-05	4.87148e-06	3.4686e-05	4.08696e-05	5.38452e-07	0	1.19298e-05	7.81213e-06	1.74563e-05	6.19345e-06	8.93911e-06	2.09632e-05	6.94737e-06	2.0857e-05	0	1.80323e-05	3.43719e-06	1.43588e-05	1.22522e-06	1.62633e-05	6.37605e-06	1.98783e-05	3.10851e-05	2.79283e-05	1.19641e-05	2.36162e-05
ko04010	ko04010: MAPK signaling pathway	2.94939e-05	0.000104456	1.61185e-05	5.21381e-05	2.93959e-05	2.11379e-05	1.61378e-05	5.72803e-05	2.10305e-05	6.95231e-05	8.94586e-05	4.51418e-05	0.000120464	5.47874e-05	1.10093e-05	5.21598e-05	9.03814e-05	2.87159e-05	1.65583e-05	0.000153756	2.74803e-05	7.53209e-05	0.000115622	0.00011521	4.22284e-05	8.49058e-05	7.06421e-05	6.31633e-05	5.31673e-05	3.38229e-05	1.63677e-05	1.22907e-05	6.21824e-06	6.58204e-05	2.13992e-05	2.33474e-05	2.72798e-05	3.10602e-05	3.57512e-05	4.21787e-05	3.72142e-05	5.48161e-05	2.96644e-05	9.64515e-05	0.000101633	5.64181e-05	8.29025e-05	0.000144052
ko04620	ko04620: Toll-like receptor signaling pathway	0	0	8.5971e-06	0	1.15633e-05	1.50152e-05	2.06163e-05	0	1.39382e-05	5.78766e-06	0	1.59478e-05	1.2562e-05	0	0	7.97097e-06	0	0	6.75745e-06	3.00536e-05	5.48379e-06	8.81952e-06	3.32796e-05	2.62352e-05	1.01605e-05	8.11543e-06	0	7.20991e-06	8.34156e-05	8.5639e-06	9.39849e-06	0	6.51949e-06	3.1703e-05	0	0	0	0	1.50526e-05	1.00038e-05	0	2.18559e-05	0	7.20759e-06	5.67761e-06	1.0362e-05	6.20708e-05	3.88839e-06
ko04012	ko04012: ErbB signaling pathway	3.38782e-05	0	1.07393e-05	0	2.15058e-05	0	7.81042e-06	8.64063e-05	1.57444e-05	2.76691e-05	4.61698e-05	2.69314e-05	0.000110609	4.08029e-05	2.02775e-05	5.18037e-05	0	0	6.80408e-06	7.82829e-05	1.80428e-05	2.52822e-05	0	6.24525e-05	3.5791e-05	0	2.16482e-05	0	0	1.98368e-05	1.13942e-05	2.32527e-05	3.37673e-05	2.42299e-05	5.61719e-06	9.35814e-06	0	1.70836e-05	1.61718e-05	0	1.27307e-05	1.673e-05	3.98349e-05	4.45616e-05	3.09922e-05	2.27411e-05	2.24342e-05	7.05022e-05
ko04640	ko04640: Hematopoietic cell lineage	2.14183e-06	3.16341e-06	0	0	4.32604e-06	2.55377e-06	6.05111e-06	1.34601e-05	1.60014e-07	1.33256e-05	0	2.90451e-06	3.85349e-06	3.57486e-06	0	0	0	0	1.51115e-06	7.30557e-06	8.19594e-07	1.14066e-06	0	6.22978e-06	1.62315e-06	0	0	3.98418e-08	2.26569e-06	4.41615e-06	0	0	0	4.42717e-06	0	3.97856e-07	5.47206e-06	3.36464e-06	1.31088e-06	0	8.02358e-07	1.372e-05	1.08793e-05	5.9036e-08	3.80812e-06	5.84061e-06	0	0
ko04920	ko04920: Adipocytokine signaling pathway	6.25818e-06	4.13923e-05	3.03409e-05	2.13353e-05	1.6127e-05	5.91585e-05	4.16135e-05	5.10446e-05	3.46026e-05	3.82332e-05	0.000322616	5.18765e-05	0.000274911	2.08276e-05	1.85726e-05	6.33086e-05	2.13351e-05	0	1.36014e-05	0.000374249	2.67748e-05	8.17698e-05	0	0.000155069	3.07441e-05	8.35106e-05	5.88442e-05	0.000186663	5.19948e-05	5.56315e-05	3.50021e-05	1.68316e-05	9.88907e-06	7.47258e-05	1.52897e-05	1.12683e-05	3.29692e-05	2.14592e-05	0.000108232	5.6147e-05	4.66971e-05	9.12826e-05	2.23267e-05	0.00013212	0.00012009	7.06642e-05	5.16648e-05	0.00020283
ko00621	ko00621: Dioxin degradation	0	0	0.00356749	0	0	0	0	0	0	0	0	1.37562e-06	4.24338e-09	5.19592e-06	0	0	0	0	0.0021815	1.62031e-05	0.00161848	0	0	0	0.000898933	0	0	0.00229823	0	0.00226043	0.00262473	0.0023629	0	0.00165892	0.00111671	0.002222	0	0	0	0	0	0	0	0	0	0.000340443	0	0
ko04930	ko04930: Type II diabetes mellitus	0	0	2.48209e-06	0	2.01729e-06	0	0	0	5.86577e-05	0	1.95671e-07	2.71034e-05	2.14206e-05	0	0	0	0	0	9.54875e-06	7.49493e-05	3.52532e-05	1.20555e-05	1.13433e-05	0	3.98593e-05	2.14316e-05	0	0	0	3.64937e-05	1.12139e-06	0	0	5.95559e-06	0	3.26964e-06	0	0	0	0	0	2.55469e-06	0	1.4524e-05	6.31109e-06	4.52285e-05	2.90387e-05	2.41443e-05
ko04360	ko04360: Axon guidance	1.54942e-05	2.84036e-05	7.45449e-06	1.97132e-05	1.32356e-05	1.34688e-05	7.26685e-06	1.07948e-05	7.44309e-06	1.62847e-05	2.48149e-05	1.02234e-05	2.86885e-05	2.62053e-05	8.69009e-06	3.45564e-06	3.61692e-05	8.91495e-06	6.05297e-06	3.62386e-05	7.63673e-06	1.32494e-05	4.22803e-05	3.61912e-05	8.93767e-06	3.20002e-05	9.9539e-06	1.04417e-05	1.04019e-05	9.44785e-06	7.66815e-06	1.49632e-05	0	1.36592e-05	7.03325e-06	9.74304e-06	1.66935e-05	9.39982e-06	7.69927e-06	4.84394e-09	7.79951e-06	2.5425e-05	1.01937e-05	9.33632e-06	7.9339e-06	2.68775e-05	3.04883e-05	2.53093e-05
ko00983	ko00983: Drug metabolism - other enzymes	0.000256198	0.000475042	0.000440381	0.000530087	0.000495475	0.000783282	0.00086261	0.000283562	0.00101883	0.000178558	0.00101077	0.00111382	0.000618794	0.000148881	0.000502914	0.000621246	0.000312375	0.0007585	0.000690604	0.000860756	0.000568237	0.000902466	0.000796728	0.000366407	0.0010264	0.00089751	0.00106975	0.000560028	0.000846937	0.000727938	0.000835922	0.000401414	0.000613304	0.000699972	0.000446546	0.000494173	0.000570183	0.00101521	0.000216162	0.000938843	0.000666352	0.000995651	0.000476855	0.000633318	0.000510123	0.000876536	0.000647603	0.000584958
ko04950	ko04950: Maturity onset diabetes of the young	1.10499e-05	7.47497e-05	2.46542e-05	5.95451e-05	3.27485e-05	3.42033e-05	1.5345e-05	0.000119916	1.40684e-05	5.71696e-05	8.69258e-05	1.82009e-05	4.30475e-05	6.80078e-05	5.59606e-05	1.04459e-05	0.00014604	0	8.05438e-06	3.72879e-05	1.04207e-05	3.13174e-05	0.000243057	7.33704e-05	4.17341e-05	2.08311e-05	1.01376e-05	0.00010843	4.28299e-05	2.2153e-05	1.7689e-05	7.96118e-06	6.46899e-05	5.65487e-05	5.48497e-05	1.84473e-05	5.73499e-05	0	7.43975e-05	0	4.92474e-05	2.04831e-05	6.44561e-05	3.20122e-05	3.59961e-05	0.000140217	0.000159848	0.000102119
ko05130	ko05130: Pathogenic Escherichia coli infection	7.814e-05	2.82253e-05	4.39627e-05	0.00028369	0.000102438	0.00011475	0.000255365	8.42499e-05	8.63921e-05	0.000106193	0.000335785	0.000128804	0.000383969	3.94628e-05	4.89085e-05	0.000122738	0.000115844	4.89066e-07	3.96721e-05	0.000493249	7.74574e-05	0.000158854	0.000121093	0.00023428	0.000124219	0.000187626	0.000371699	0.000189804	0.000435557	0.000211426	7.6905e-05	0.000229003	7.8998e-05	8.19213e-05	0.000101676	3.52542e-05	0.000104055	0.000213025	3.87928e-05	0.000181045	9.63539e-05	0.000130551	0.000123937	0.000149356	0.000134226	8.37134e-05	0.000100069	0.000314192
ko04110	ko04110: Cell cycle	7.3434e-05	0.000170196	3.34177e-05	0	1.21196e-05	1.14282e-05	0.000112564	0.000123715	1.24891e-05	9.13021e-05	7.19348e-05	3.36049e-05	0.000174992	2.03156e-05	3.73887e-05	0.000175469	0	1.63583e-05	3.85339e-05	0.000173511	5.35265e-06	7.86828e-05	8.5622e-05	0.000104445	2.75198e-05	6.95393e-05	0	6.93306e-05	0.000194563	2.91727e-05	1.38104e-05	5.69057e-05	4.20273e-05	3.7331e-05	1.8682e-05	3.07933e-05	0	4.64823e-05	5.66592e-05	3.13397e-05	1.3024e-05	4.99738e-05	2.2669e-05	5.73659e-05	4.59233e-05	6.18035e-05	7.78458e-05	0.000120854
ko00072	ko00072: Synthesis and degradation of ketone bodies	0.00132249	0.00359541	0.0102468	0.00495508	0.0100222	0.00527745	0.00588593	0.00241552	0.0097897	0.00329522	0.00427123	0.0105385	0.00691741	0.00228144	0.0138986	0.00568578	0.00440812	0.0109035	0.00826373	0.0101408	0.00475277	0.00853101	0.00675079	0.00500331	0.00805887	0.00587713	0.00755668	0.0037299	0.00750833	0.00630424	0.0066575	0.0044223	0.00769367	0.0081917	0.00542596	0.00726384	0.00321874	0.00625773	0.00558483	0.00823905	0.00459374	0.0169576	0.0021651	0.00728086	0.00831791	0.00558264	0.00551553	0.00595326
ko05016	ko05016: Huntington's disease	5.03762e-06	2.61773e-05	3.44398e-06	2.55708e-05	3.82637e-06	4.94875e-06	7.91213e-06	9.33336e-06	3.29517e-06	1.77787e-05	2.36043e-05	1.11331e-05	6.02865e-05	2.58529e-06	2.85264e-06	6.22283e-06	2.50378e-06	9.76531e-06	3.15856e-06	8.31588e-05	1.8025e-06	2.68366e-05	2.93103e-05	2.19784e-05	1.02096e-05	1.20225e-05	4.31307e-06	6.68643e-06	1.79292e-05	1.23902e-05	3.81957e-06	1.54969e-06	8.36162e-07	1.68274e-05	2.97626e-06	5.23832e-06	4.57924e-06	1.62096e-06	2.26076e-06	9.85003e-06	1.05387e-06	2.43063e-05	1.23078e-05	2.44427e-05	2.29018e-05	8.30279e-06	2.49855e-05	4.01145e-05
ko04380	ko04380: Osteoclast differentiation	0	4.16428e-05	3.50375e-06	0	4.22655e-06	5.95891e-06	0	0	9.96606e-07	0	2.45547e-05	2.11165e-06	4.56451e-06	7.24003e-06	2.25858e-06	0	0	1.26071e-05	3.73491e-06	6.54722e-06	0	5.75499e-06	1.87398e-05	1.75524e-05	3.4216e-07	0	0	1.19048e-05	6.39723e-06	4.41367e-06	0	4.27141e-06	0	0	0	0	0	3.15243e-06	4.58947e-06	0	7.91981e-06	0	0	5.30298e-06	0	0	0	3.47679e-06
ko04622	ko04622: RIG-I-like receptor signaling pathway	3.45681e-05	3.22928e-05	2.57084e-05	2.75354e-05	5.75846e-05	9.08759e-05	2.60089e-05	7.30874e-05	5.66774e-05	0.000139645	0.000291739	0.000107271	0.000366846	1.96286e-05	1.9521e-05	5.74085e-05	4.94244e-05	3.63989e-05	1.65462e-05	0.000621149	4.2939e-05	0.000200714	0.000156832	0.000253879	0.000117147	0.00017197	4.77586e-05	8.70169e-05	2.89912e-05	6.73087e-05	6.84435e-05	8.81375e-06	3.46784e-06	7.70987e-05	2.76369e-05	3.79999e-05	4.46817e-09	5.67304e-05	4.30348e-05	8.07841e-05	8.25094e-05	0.000169169	6.35476e-05	0.000263465	0.000198576	5.11971e-05	5.55082e-05	0.000326729
ko04666	ko04666: Fc gamma R-mediated phagocytosis	1.59374e-06	1.14514e-08	6.61479e-06	1.07542e-08	0	0	0	2.69571e-06	2.01328e-07	1.24265e-06	1.69261e-05	1.43496e-06	2.98866e-06	6.99612e-06	2.94607e-08	3.15164e-06	9.59971e-06	9.24371e-07	5.43243e-08	4.89407e-06	7.364e-07	4.04756e-06	2.36299e-07	3.95635e-06	6.6842e-06	0	0	0	0	1.61369e-06	0	3.43487e-06	0	4.20394e-06	4.96609e-06	3.53711e-06	2.2024e-07	1.23966e-05	9.6684e-06	7.17269e-06	2.66205e-06	3.34733e-06	1.63144e-05	1.90373e-06	3.2205e-08	8.42851e-07	6.72591e-06	4.20823e-06
ko00960	ko00960: Tropane, piperidine and pyridine alkaloid biosynthesis	4.7222e-05	9.16722e-05	1.65185e-06	7.03647e-06	3.68347e-06	1.5596e-05	8.91402e-06	4.21606e-05	1.38218e-06	0	1.14649e-05	1.00416e-06	1.97381e-05	2.19239e-05	9.76539e-06	0	1.4842e-05	0	9.38593e-06	1.02736e-05	4.45727e-06	3.00763e-06	1.70967e-05	6.48102e-06	3.12684e-06	0	2.29152e-06	7.58686e-06	1.97182e-05	1.13092e-05	1.7987e-06	5.19688e-06	0	2.92038e-06	1.12835e-05	3.80763e-06	0	8.96986e-06	3.73037e-05	2.08255e-08	1.63884e-06	0	3.93873e-06	1.54932e-05	2.66457e-06	4.19746e-06	6.17617e-06	1.04941e-05
ko00565	ko00565: Ether lipid metabolism	0	0	0.000466906	0	4.59655e-05	0	8.10175e-05	0.000134921	1.29488e-05	4.04006e-05	0.000332307	6.01238e-05	0.000456589	3.48247e-05	2.48251e-05	5.06881e-05	0	0	4.47649e-05	0.00425623	3.26583e-05	0.000116418	7.02779e-05	0.00012783	5.64501e-05	0.000104157	0.000137694	0.000107337	4.18634e-06	8.26284e-05	3.75514e-05	2.29288e-05	0	0.000183324	3.73808e-05	4.5216e-05	0	5.14221e-05	2.79011e-05	3.81557e-05	6.14979e-05	0.000132332	1.22001e-05	0.000216039	0.00020462	3.78762e-05	0.000109068	0.000681525
ko04210	ko04210: Apoptosis	1.68519e-05	6.41173e-05	0.000418051	0	0.000176962	0.000238256	0	0	1.00128e-05	0.000194953	8.00869e-05	7.57909e-05	0.000256208	6.25558e-05	0.00028893	0	2.81133e-05	0.000376008	2.96972e-05	0.000321847	3.87504e-05	5.02065e-05	0.000115061	0.00011218	1.64849e-05	6.39678e-05	0	1.60113e-05	0	8.72989e-05	4.99351e-05	1.76581e-05	0.000131144	0.000116142	3.17779e-05	0.000143909	0.000228679	2.14838e-05	0.000251676	0.000114305	3.02925e-05	7.08493e-05	3.44118e-05	8.77939e-05	0.000165683	3.06312e-05	2.80344e-05	0.000244159
ko04260	ko04260: Cardiac muscle contraction	7.17861e-06	2.97532e-05	0	2.1466e-05	1.38067e-05	1.51998e-05	0	0	0	0	9.05033e-06	6.00709e-06	4.70731e-05	0	0	0	0	0	0	2.06328e-05	2.45831e-06	7.28083e-06	0.00010484	3.3359e-05	3.96852e-06	2.41784e-05	1.29577e-05	7.91078e-06	1.79977e-05	1.22633e-05	0	0	0	1.1825e-05	0	1.29831e-05	8.84654e-05	0	1.03444e-05	0	0	1.54868e-05	2.15637e-05	1.06088e-05	1.80098e-05	3.53752e-05	2.81087e-05	2.95379e-05
ko04115	ko04115: p53 signaling pathway	3.44168e-05	3.80694e-05	8.48267e-06	9.06904e-05	2.54657e-05	6.75683e-05	9.83558e-06	7.35122e-05	2.83432e-05	3.914e-05	4.93496e-05	5.57681e-05	0.00019988	4.45124e-05	5.97748e-07	1.52086e-05	0.000155927	1.40376e-05	2.41528e-05	0.000292018	3.10413e-05	6.44564e-05	2.60395e-05	8.85462e-05	5.38477e-05	8.2317e-05	8.93884e-05	2.22907e-05	1.13169e-05	5.73581e-05	2.77045e-05	3.87144e-06	7.02587e-06	5.04621e-05	2.3666e-05	1.82806e-05	0	1.18116e-06	5.68777e-06	2.50625e-07	4.04123e-05	0.000106959	3.43397e-05	0.000138533	0.00020087	4.96836e-05	3.56517e-05	0.000223521
ko04660	ko04660: T cell receptor signaling pathway	0	0	3.50347e-06	0	1.25236e-06	0	0	9.85026e-06	7.31236e-07	8.64275e-06	0	7.81134e-07	9.01211e-07	0	0	0	0	0	0	8.9985e-06	8.13941e-07	6.31711e-07	9.52145e-07	0	8.54972e-08	0	1.36951e-05	3.03191e-06	0	9.89518e-07	1.05653e-06	0	0	2.9167e-06	0	6.00332e-06	0	0	0	0	0	0	0	3.29154e-06	0	3.08276e-06	6.45811e-06	5.48151e-07
ko00603	ko00603: Glycosphingolipid biosynthesis - globo series	0	0.000152356	1.66301e-05	0	1.30724e-05	2.05061e-05	0	0	0	0	0	2.48595e-05	9.35039e-06	0	0	0	0	0	1.47557e-05	3.45069e-05	0	1.33774e-05	8.22535e-05	0	1.39404e-05	5.42295e-05	5.71164e-05	0	0	0	0	2.19328e-05	0	1.38338e-05	0	4.37826e-05	1.36345e-05	0	8.56093e-06	0	3.02678e-05	3.78497e-05	2.08849e-05	3.86219e-06	1.38015e-05	0	0	0
ko00941	ko00941: Flavonoid biosynthesis	8.70783e-05	0	6.68281e-06	0	2.26868e-05	1.70378e-05	4.67942e-05	0	1.57865e-06	3.87113e-07	6.58454e-05	7.27883e-06	8.58547e-05	1.81292e-06	0	0	5.03013e-05	0	2.4223e-05	2.09719e-05	9.45718e-06	1.02369e-06	0	0	0	0	0	0	4.73782e-05	6.44349e-06	1.9771e-06	5.80528e-05	0	9.02499e-06	2.21846e-07	1.23758e-05	4.58589e-06	0.000138401	2.06707e-06	0	6.2924e-07	0	3.62198e-05	3.69186e-08	1.49119e-05	4.61421e-07	4.46368e-07	5.66426e-05
ko04722	ko04722: Neurotrophin signaling pathway	1.44888e-09	7.49283e-06	1.19899e-06	4.99774e-05	3.82292e-08	0	5.77649e-06	1.38274e-07	4.31397e-06	5.46498e-06	2.55093e-07	6.63948e-06	4.8492e-06	2.14981e-07	2.53381e-06	9.12543e-06	2.26546e-05	2.82368e-07	4.13956e-06	1.25675e-05	1.76821e-06	1.37367e-06	1.04435e-05	9.24867e-06	3.69467e-07	3.53653e-08	1.07915e-05	1.99734e-07	7.07754e-06	1.77661e-07	4.05679e-06	4.46297e-08	2.00913e-05	4.06982e-06	6.54499e-07	4.29068e-07	2.0546e-05	0	3.68801e-07	7.5798e-06	0	2.00869e-05	5.31491e-09	1.47673e-06	6.55518e-07	3.09633e-05	1.56818e-05	3.70522e-06
ko05142	ko05142: Chagas disease (American trypanosomiasis)	0.000417397	0	0	0.000287638	0	0.000167107	0	0.000349104	0	0.00051296	0.000545665	0	0	3.46299e-05	0.000159343	0	0.000204552	0.000138598	0	0	0.000261764	0.000590188	0.000132052	0.000112875	0	0.00032355	1.87747e-05	2.59848e-05	3.41723e-05	0	0	0.000157181	0.000137862	0	0.000284709	0.00030667	7.40217e-05	0.000252607	0	0	0.000260383	0	0.000304279	0	0.000338895	0	0.000648669	0.000257408
ko04670	ko04670: Leukocyte transendothelial migration	0	2.78106e-05	3.49147e-06	3.88642e-06	5.6142e-06	9.86063e-06	0	9.00694e-06	5.54354e-06	3.5748e-06	2.0792e-07	3.00865e-06	6.54538e-06	0	0	9.93402e-06	2.23183e-07	0	3.80018e-07	1.08791e-05	1.1258e-07	1.58795e-07	1.56706e-05	9.92197e-06	8.76727e-07	9.29909e-06	4.25349e-06	6.44206e-06	3.13084e-07	0	4.62939e-06	3.34709e-08	1.17936e-06	2.89963e-06	5.82394e-08	8.16899e-07	7.67096e-06	1.75415e-07	6.56785e-07	9.99516e-06	6.67727e-06	6.07712e-05	0	7.32463e-06	5.43612e-06	1.37695e-05	2.57302e-06	3.75464e-06
ko04710	ko04710: Circadian rhythm - mammal	4.44516e-05	0	0	2.98518e-05	3.6281e-05	2.54125e-05	1.27331e-05	5.01768e-05	4.50807e-05	3.39868e-05	7.42585e-05	6.48708e-05	0.000204046	4.46119e-06	1.64717e-05	3.89724e-05	0	0	3.2591e-05	0.000217846	1.60951e-05	6.71971e-05	0.000227393	7.19343e-05	5.42471e-05	0	2.20903e-05	4.54439e-05	4.05037e-05	3.49753e-05	2.76299e-05	2.51978e-06	1.16472e-06	0.000110432	7.99536e-06	3.31739e-05	0	0	8.88183e-06	4.42025e-05	2.62225e-05	9.94722e-05	0.000369663	0.000128389	0.000186958	0.000108856	5.06173e-05	0.000162276
ko04623	ko04623: Cytosolic DNA-sensing pathway	7.20992e-06	0	1.99506e-06	1.6567e-05	3.55959e-07	0	0	8.29112e-06	1.03764e-05	5.75581e-06	1.22101e-05	7.84984e-06	4.84691e-06	2.05868e-05	0	0	0	0	5.92389e-06	3.86324e-05	1.52713e-05	1.31166e-05	1.04549e-05	3.64363e-05	1.76575e-06	1.06287e-06	6.51306e-06	3.70571e-06	0	3.19629e-06	5.54925e-06	9.40042e-06	0	1.11959e-05	6.21633e-06	1.34179e-06	4.70456e-05	5.07205e-06	1.11624e-05	5.26816e-06	8.38337e-06	4.5792e-06	5.50809e-06	1.95866e-05	5.52167e-06	2.33771e-06	2.71117e-05	1.37952e-05
ko05014	ko05014: Amyotrophic lateral sclerosis (ALS)	1.1512e-05	3.16013e-07	9.56004e-06	5.05215e-08	1.159e-05	1.69863e-05	1.96466e-08	5.38629e-06	3.18956e-06	0.000242792	6.46849e-05	5.10872e-05	0.000293821	7.26004e-06	7.89329e-06	9.97182e-06	1.13566e-05	0	4.6379e-06	0.000444032	1.51458e-05	0.00012367	0	0.000135129	5.73233e-05	4.24851e-05	2.78871e-05	4.05577e-05	2.17723e-05	4.83516e-05	1.22754e-05	2.33137e-05	6.56305e-06	3.02141e-05	1.06287e-07	6.66662e-06	4.78788e-08	8.03025e-06	3.04009e-05	1.91514e-05	1.03708e-05	7.24144e-05	2.86926e-05	0.000222572	0.000127341	1.65565e-05	2.07472e-05	0.000180961
ko04142	ko04142: Lysosome	5.01041e-05	0.000186628	3.15539e-05	4.98704e-05	0.000244257	6.50056e-05	4.35329e-05	3.02691e-05	3.98278e-05	0.00017149	0.000527239	0.000159124	0.000745746	2.53986e-05	0.00010402	0.00011162	0.000178754	4.96836e-05	0.000117253	0.00105718	7.82002e-05	0.000323149	9.03363e-05	0.000389532	0.000135613	0.000209615	0.000188102	0.00023396	8.97078e-05	0.000298389	0.00015221	2.45152e-05	0.00014136	0.000371614	2.14314e-05	0.000126475	9.13074e-05	5.35983e-05	9.73143e-05	0.000256602	6.01744e-05	0.000421442	5.93844e-05	0.000497162	0.000716812	9.17703e-05	0.000279527	0.000804631
ko00980	ko00980: Metabolism of xenobiotics by cytochrome P450	0	0	3.63386e-06	2.72942e-06	3.01709e-05	0	0	0	8.14453e-05	0	5.25242e-05	4.0831e-05	3.35122e-05	4.77779e-05	4.35256e-07	0	0	0	4.77434e-05	1.48831e-05	4.87901e-05	5.95479e-05	0	2.85479e-06	4.05188e-05	0	0	1.19903e-06	0	3.26213e-05	2.48538e-05	1.23133e-05	9.49438e-05	3.72988e-05	6.77297e-08	2.53253e-05	0	0	4.69622e-05	0	3.20693e-05	2.92264e-05	8.41992e-05	6.91252e-05	1.68418e-05	0	5.25124e-05	1.83968e-05
ko04350	ko04350: TGF-beta signaling pathway	5.09725e-05	8.16397e-06	8.74307e-06	0	1.40166e-05	1.08225e-05	2.76648e-05	1.75388e-05	6.24773e-06	4.40612e-05	1.58517e-05	1.76261e-05	3.75338e-05	2.32075e-05	5.41733e-07	0	7.08136e-05	0	4.53576e-06	7.37025e-06	9.40114e-06	8.65093e-06	0.000230013	5.98295e-05	5.88888e-06	1.99889e-05	0	0	2.94867e-05	1.43107e-05	1.157e-05	1.53674e-05	2.19417e-05	2.85457e-05	1.26368e-05	2.16741e-05	0	7.10788e-06	0	2.27775e-06	0	3.76684e-06	1.25432e-05	1.63687e-05	1.38401e-05	6.73463e-05	0.000106567	3.11015e-05
ko05010	ko05010: Alzheimer's disease	4.88769e-05	3.63228e-05	2.20474e-05	1.45256e-05	7.31055e-05	1.44191e-05	4.65947e-05	2.49945e-05	8.52224e-06	4.09442e-05	0.000155018	2.95453e-05	0.000162067	9.07176e-07	1.41445e-05	2.80487e-05	2.60352e-05	3.46978e-05	2.59688e-05	0.000220484	1.62485e-05	7.85144e-05	5.31749e-05	8.96086e-05	2.63539e-05	3.61656e-05	5.47385e-05	3.61936e-05	4.1554e-05	4.40955e-05	4.97881e-05	2.44578e-05	0.00010048	4.45152e-05	9.15999e-06	4.44892e-05	9.98564e-06	5.90584e-05	7.78766e-06	6.47915e-05	2.33874e-05	9.1138e-05	6.40457e-06	0.000106333	9.48371e-05	9.766e-06	3.0326e-05	9.80766e-05
ko04940	ko04940: Type I diabetes mellitus	0	0	4.25592e-06	0	4.3356e-05	0	0	5.22873e-09	0	0	0	1.65356e-06	5.56899e-06	1.38279e-06	0	0	0	0	4.16036e-06	0	2.55319e-06	9.8454e-08	0	6.33477e-06	1.45977e-10	0	0	0	0	0	0	5.01279e-08	0	1.16864e-05	0	2.26131e-10	0	0	0	0	0	0	0	0	0	0	2.72887e-05	0
ko00601	ko00601: Glycosphingolipid biosynthesis - lacto and neolacto series	0	0	0	0	1.58372e-05	0	0	3.31097e-05	5.46389e-10	0	0	2.57456e-06	0	0	3.38799e-05	0	7.18855e-06	0	3.54819e-10	0	8.9482e-06	2.55069e-10	0	1.47058e-05	0	0	0	1.1741e-09	0	2.97986e-06	0	0	0	8.83953e-06	0	0	0	0	0	0	3.20523e-09	0	1.76565e-06	0	7.64076e-10	8.66095e-06	0.000101961	1.22519e-05
ko00906	ko00906: Carotenoid biosynthesis	0.000219573	0.000271252	0.000232261	0.000593705	0.0001853	0.00100644	0.00154937	0.000209816	0.000656031	0.000362088	0.000427686	0.000640682	0.000453521	0.000278591	0.000109906	0.00059155	0.000503598	0.000377638	0.000441921	0.000417198	0.000248341	0.000502508	0.000109996	0.0001944	0.000549418	0.000464274	5.94996e-05	8.35617e-05	0.0038337	0.000291559	0.000496608	0.00134794	8.62661e-05	0.000437582	0.000286055	0.000430936	0.00138934	0.0012982	0.000368948	0.000547015	0.000313743	0.000664386	0.000196597	0.000364562	0.000161179	0.000490224	0.000644198	0.000699285
ko05322	ko05322: Systemic lupus erythematosus	5.56189e-06	3.4309e-05	1.37637e-05	2.90823e-05	4.21045e-05	2.9329e-05	2.48861e-05	0.000105263	2.14659e-05	0.000397768	0.000248974	9.97977e-05	0.000758028	3.17155e-05	2.35704e-05	0.000134234	0.000102043	0	1.53167e-05	0.000969269	2.78501e-05	0.000256253	3.86443e-05	0.000397754	9.27973e-05	6.92081e-05	0.000207322	0.000200228	1.34263e-05	0.000106228	3.14946e-05	2.46861e-05	1.25558e-05	0.000133649	1.4497e-05	1.65925e-05	6.41115e-06	1.04319e-05	0.000272199	0.000260465	2.80606e-05	0.000417701	8.6494e-05	0.000259493	0.00029415	9.8567e-05	6.5742e-05	0.000626903
ko04114	ko04114: Oocyte meiosis	6.57416e-06	5.37325e-05	4.05397e-06	2.57815e-05	1.3597e-05	9.99111e-06	0	3.10864e-08	8.23194e-06	4.56832e-06	3.67131e-05	8.16853e-06	6.48971e-05	5.75965e-06	1.50431e-05	0	0	0	1.50684e-06	5.56136e-05	1.90081e-06	1.07827e-05	0	2.30706e-05	6.24161e-06	1.113e-05	8.58326e-05	9.65479e-07	2.20109e-05	7.02982e-06	2.94969e-06	1.59081e-07	4.19175e-06	1.22554e-05	2.43914e-06	1.17883e-05	0	1.62345e-05	2.92444e-06	2.23801e-05	1.41262e-08	1.58267e-05	1.68695e-07	3.11008e-05	1.35333e-05	2.31797e-05	0	4.89503e-05
ko04340	ko04340: Hedgehog signaling pathway	1.14874e-05	7.58181e-05	9.63243e-06	0	6.45946e-05	6.92321e-06	0	0	2.32638e-05	8.29196e-05	0.000144837	6.19569e-05	0.000166098	3.99307e-05	9.01541e-06	9.83263e-05	1.19927e-05	4.79948e-06	2.08338e-05	0.000202577	1.12342e-05	5.76193e-05	0.000310441	0.000134532	4.14098e-05	2.85955e-05	9.03672e-05	6.15312e-05	4.84488e-05	3.07992e-05	2.16547e-05	7.73036e-06	0	7.99709e-05	7.06801e-06	1.68416e-05	0	1.4992e-05	3.91834e-05	3.64876e-05	5.00895e-05	6.88968e-05	3.49138e-05	0.000124035	0.00011308	5.68223e-05	4.41952e-05	0.000185915
ko04510	ko04510: Focal adhesion	6.84631e-06	0	5.38711e-06	4.54613e-06	3.7977e-06	4.63134e-06	1.21498e-05	1.88817e-05	5.32303e-06	3.92716e-06	1.42301e-05	9.83152e-06	2.93447e-05	9.05351e-06	0	1.09636e-05	1.93115e-05	0	1.09244e-06	2.2723e-05	8.60206e-06	1.8058e-05	7.81574e-06	5.95154e-05	3.81159e-06	6.81874e-06	4.57228e-06	5.22786e-07	1.0795e-05	6.22609e-06	1.48015e-06	9.44213e-07	0	1.97866e-05	4.49769e-06	2.95596e-06	1.53391e-05	1.23862e-06	1.70001e-06	1.14266e-05	8.38094e-06	1.96016e-05	2.32808e-05	1.2338e-05	7.66637e-07	2.87979e-05	1.22074e-05	1.02125e-05
ko04810	ko04810: Regulation of actin cytoskeleton	2.36028e-05	0.000167677	2.59884e-05	0.000242207	2.94304e-05	6.35437e-05	2.93245e-05	0.000118231	2.24267e-05	2.13618e-05	0.000105399	4.54671e-05	0.000173077	0.00010365	1.6252e-05	2.18506e-05	4.34812e-05	3.70804e-05	4.51419e-05	0.000238455	6.59282e-05	8.47246e-05	3.6124e-05	0.000124134	5.23115e-05	0.000122778	2.12237e-05	6.06027e-05	8.2836e-05	3.96328e-05	2.1902e-05	3.28261e-05	8.83512e-06	5.06755e-05	3.20816e-05	1.6246e-05	7.84506e-05	6.58947e-05	0.000103803	4.83768e-05	3.3442e-05	6.70824e-05	0.000110848	0.000110244	9.5007e-05	0.000113189	0.000128977	0.000132194
ko05140	ko05140: Leishmaniasis	0	0	0	0	0	0	0	0	0	0	0	0	0	0	0	0	0	0	0	0	0	2.51949e-06	0	0	0	0	0	0	0	0	0	0	0	0	0	0	0	8.0299e-07	0	0	0	0	0	0	0	0	0	0
ko00361	ko00361: Chlorocyclohexane and chlorobenzene degradation	0.000233077	0.000694826	0.000294728	0.000190434	0.000205153	0	0.000643206	0.000316194	0.000257327	0.000286034	0.000247768	0.000169124	0.000461613	0.000493705	0.000782716	0.000741255	0.000494304	0	0.00132377	0.000253408	0.000411168	0.000503693	0.000983404	0.000398429	0.000359559	0.000814429	0.00204579	0	0.00126163	0.00084018	0.00234551	0.000632606	0	0.000527799	0.000455353	0.000240693	0	0.000796387	0.000851733	0.0016428	0.000814843	0.00131311	0.000455267	0.000461285	0.000418404	0.0003886	0.000447365	0.000332525
ko04740	ko04740: Olfactory transduction	0.000173428	2.23376e-05	7.75255e-06	3.5981e-06	3.00448e-06	8.82288e-06	7.05888e-06	1.18809e-05	1.70912e-07	1.63519e-06	7.04441e-07	1.61298e-07	3.67237e-06	1.32283e-05	8.09129e-06	1.53388e-05	7.30194e-07	1.4239e-05	2.78051e-05	8.3242e-07	9.83243e-07	1.24896e-06	4.5398e-05	3.45442e-05	5.75078e-05	9.7568e-05	3.8282e-06	3.42385e-05	1.86533e-05	2.69047e-06	5.71414e-07	3.59126e-06	3.84042e-06	4.25505e-05	1.24372e-05	4.62351e-06	6.09864e-06	2.64356e-05	1.66994e-05	2.37113e-06	3.79779e-05	1.83873e-05	1.27715e-05	7.93723e-07	1.2669e-05	8.30737e-06	5.41449e-05	8.47845e-07
ko05216	ko05216: Thyroid cancer	0	0	0	0	5.02757e-06	0	0	0	4.56052e-07	0	0	2.46449e-05	0	0	0	0	0	1.32918e-09	0	0	0	0	0	2.3624e-05	0	0	0	0	0	0	0	0	0	9.09986e-06	0	0	0	0	0	0	0	0	0	0	0	7.66489e-06	0	0
ko05100	ko05100: Bacterial invasion of epithelial cells	0.000121696	0	0	0	0.000201156	0	0.000148998	0	0.000146364	0.000522213	0.000934845	0.000310184	0.00123581	0	6.41677e-05	0.000230081	0	0	0	0.00140806	0	0.000484473	0.000410423	0.000712064	0.000345704	0	0.00043544	0.000430909	0	0.00042694	0.000152061	0	0	0.000198672	0	0.000123391	0	0	0	0.000241024	0.000212981	0.000508112	0	0.000695013	0.000496594	0	0	0.000996314
ko05320	ko05320: Autoimmune thyroid disease	6.3589e-07	3.31975e-07	3.5157e-06	0	0	3.29455e-08	0	5.98809e-10	0	0	0	4.17594e-08	1.08067e-06	1.69804e-06	0	0	0	0	7.3239e-08	0	1.35065e-06	3.18854e-08	0	4.61698e-06	7.28667e-08	0	0	0	0	3.59006e-08	2.91271e-07	1.84539e-07	0	0	3.93783e-06	2.00915e-07	0	6.43173e-06	2.54597e-10	0	0	0	1.7728e-06	0	2.32641e-07	4.65023e-07	2.62152e-07	1.49668e-06
ko05219	ko05219: Bladder cancer	0	0	0	0	0	0	0	0	0	0	0	0	0	0	0	0	0	0	0	0	0	0	0	0	0	0	0	0	0	8.87767e-07	0	0	0	8.40834e-07	0	0	0	0	0	0	0	0	0	0	0	0	0	0
ko00623	ko00623: Toluene degradation	0	0.00670282	0.00616974	0	0	0.00846127	0	0	0.00725773	0	0	0.00717003	0.00503107	0.00644243	0	0.00671475	0	0.00914513	0.00701713	0.00456917	0.00681142	0.00625153	0	0	0.00691434	0	0	0.00720302	0	0.00700292	0	0	0.00625155	0.00646327	0.00724908	0	0	0	0.0088607	0	0	0	0.00669429	0.00627429	0.0075684	0.00688782	0	0.00504446
ko05414	ko05414: Dilated cardiomyopathy	0	0	0	8.19828e-06	0	1.01208e-07	0	0	0	1.92407e-07	0	1.3424e-06	8.0754e-07	0	0	5.9994e-07	0	0	0	1.99625e-07	0	0	0	0	1.80055e-08	1.3758e-07	0	1.04551e-07	1.64707e-07	0	0	1.86902e-10	0	0	0	0	5.71203e-07	0	0	0	0	0	0	6.45306e-07	1.17943e-06	0	1.7299e-06	0
ko05146	ko05146: Amoebiasis	2.19007e-05	2.80538e-05	1.2521e-07	5.4055e-06	9.7683e-06	2.25127e-06	5.24004e-06	1.62679e-05	0	0	0	1.20994e-05	0	0	1.35524e-10	0	5.24883e-05	1.09535e-05	7.71734e-06	0	0	0	5.43311e-06	2.61938e-05	0	3.25301e-05	0	0	0	9.89948e-06	0	0	1.63555e-05	0	0	2.83473e-06	7.84368e-05	0	5.59603e-06	0	0	0	0	1.61094e-05	1.47464e-05	0	5.30815e-05	1.2701e-05
ko00592	ko00592: alpha-Linolenic acid metabolism	7.71948e-05	0.000898425	0.00135337	0.000276905	0.000984046	0.00196907	0.000466953	0	0.00112732	0.000627218	0.000635825	0.000774066	0.00131768	0.000470723	0.00380821	0.000708453	0	0.00383533	0.00104099	0.00151757	0.00028771	0.000840552	0.000362482	0.00119203	0.00024931	0.000136961	0.000372327	0.00074917	0	0.000875935	0.0016296	0.000535056	0.000934389	0.00067008	9.05435e-05	0.00144485	0.00314953	0.000562789	0.00225741	0.000686098	0.000120458	0.0010311	0.000322754	0.000920986	0.00144768	0.000615298	0.000589634	0.00079418
ko05215	ko05215: Prostate cancer	0	0	0	0	2.02154e-06	0	0	0	0	0	0	1.47184e-06	2.54121e-06	0	0	0	0	0	0	1.2397e-05	3.49625e-06	4.81295e-06	0	0	0	0	0	0	0	7.6473e-06	0	0	0	1.78892e-06	0	0	0	0	0	0	0	0	0	5.54379e-06	0	1.22803e-06	0	0
ko05144	ko05144: Malaria	0	0	0	0	4.73257e-06	2.43421e-07	3.94279e-08	0	4.35883e-06	0	0	1.08327e-06	7.86422e-08	0	0	0	0	0	2.31002e-07	2.38116e-06	7.16849e-07	2.48566e-06	0	0	1.32087e-06	0	0	0	0	1.84838e-05	1.10786e-05	0	0	2.83717e-06	0	2.35618e-06	0	0	0	0	0	1.29194e-06	0	1.31533e-06	0	0	0	0
ko04650	ko04650: Natural killer cell mediated cytotoxicity	0	0	0	0	0	0	8.38381e-05	0	4.28722e-05	0	0	0	0	0	0	0	0	0	3.12506e-05	0	0	0	0	0	0	0	0.000226305	0	0	0	7.49844e-05	0	0	0	0	0	0	0	0	0.000144489	0	0.000290755	0	0	0	9.92168e-05	0	0
ko00930	ko00930: Caprolactam degradation	0.00216873	0.00197304	0.00264495	0.00388613	0.00153908	0.00323666	0.00233154	0.00304473	0.00222312	0.00300666	0.00344747	0.00293013	0.00330457	0.00353613	0.00466022	0.00135564	0	0.00487351	0.00235537	0.00367086	0.00222562	0.00225459	0.00230357	0.00406919	0.00206107	0.00207763	0.00222879	0.00253948	0.00196198	0.00244632	0.00242791	0.00216231	0.00136626	0.00206947	0.00241072	0.00252036	0.00564153	0.00160917	0.00306819	0.00226477	0.00203974	0.00305291	0.00208611	0.0033545	0.00367286	0.00191686	0.00244422	0.00326559
ko04916	ko04916: Melanogenesis	0	0	0	0	4.24699e-06	0	0	0	0	0	3.38613e-05	9.57009e-06	0	0	0	0	0	0	3.31105e-06	0	0	0	8.16043e-06	0	0	0	0	2.74216e-05	0	0	0	0	0	1.45973e-05	0	0	0	0	1.08285e-05	0	0	0	0	0	0	1.26732e-05	0	1.28014e-05
ko04330	ko04330: Notch signaling pathway	3.92404e-05	0.000357452	2.64618e-05	0.000144981	0.000223858	7.15e-05	0.00019038	0.000165106	0.000130042	0.000124027	0.000638204	0.000216558	0.000834029	0.000168261	2.75039e-05	7.88632e-05	0.000243445	2.55023e-05	6.08177e-05	0.00112177	0.000114516	0.000321698	0.000255443	0.00045857	0.000235001	0.000355852	8.80826e-05	0.000219212	0.000201329	0.000237335	0.000144526	6.7386e-05	3.99223e-05	0.000277141	4.74425e-05	6.82054e-05	0.00018433	7.54298e-05	0.000100779	0.000156983	9.68224e-05	0.000363202	5.85933e-05	0.000576533	0.000700163	0.000133167	0.000174858	0.000879221
ko04973	ko04973: Carbohydrate digestion and absorption	0	0	1.54043e-06	0	1.09616e-07	0	0	0	1.42831e-06	0	6.26919e-07	1.10683e-06	1.61599e-05	0	0	0	0	0	0	6.80793e-06	1.36449e-06	2.90735e-06	0	0	1.53206e-06	1.08002e-06	0	0	0	6.02789e-07	1.0025e-07	0	0	2.37063e-07	0	0	0	0	0	0	0	2.16121e-05	0	1.83588e-05	8.04939e-06	8.10954e-07	4.42759e-05	1.42752e-06
ko00531	ko00531: Glycosaminoglycan degradation	0	0.000327671	0.000224489	0	0.000175019	5.23797e-05	1.40678e-05	8.54198e-05	3.3265e-05	0	1.40829e-05	4.99782e-05	0.000177833	0.000279872	0.000153615	0	0.000612039	0.000235748	0.000162009	3.82461e-05	5.06705e-05	2.36437e-05	0.000572927	0.00011411	1.14681e-05	0.000492766	3.45765e-05	0.000152823	4.26173e-05	6.077e-05	0.000319378	0.00012546	0.000500219	0.000163396	1.95536e-05	0.00020284	3.21745e-05	2.51707e-05	5.53619e-05	7.10555e-05	0	4.09049e-05	7.38418e-05	0.000102427	5.94492e-05	0.000118057	0.000130718	0.000102642
ko05416	ko05416: Viral myocarditis	0	0	0	2.28691e-06	0	1.15471e-09	0	0	0	0	0	0	0	0	0	0	0	0	0	0	0	0	1.14005e-05	0	0	0	0	0	0	0	0	0	0	5.76428e-06	7.60969e-06	0	0	0	0	0	0	0	0	0	0	0	0	0
ko00513	ko00513: Various types of N-glycan biosynthesis	6.4027e-06	1.59358e-05	1.22783e-06	0	1.40231e-05	1.46178e-07	0	2.87735e-05	4.55347e-06	3.12603e-06	6.29189e-07	4.89007e-06	6.49474e-06	7.01479e-06	1.03781e-05	0	2.35135e-05	0	1.68494e-06	5.90743e-06	2.62559e-06	3.90684e-06	0	4.7019e-07	9.99707e-08	0	0	0	0	1.36204e-06	5.3377e-06	1.73141e-06	0	2.85211e-06	1.1818e-06	2.17427e-06	0	0	6.81589e-08	0	4.21802e-06	0	2.03981e-06	3.27125e-06	3.83474e-06	3.22092e-06	0	1.19305e-05
ko04310	ko04310: Wnt signaling pathway	6.79602e-05	0.00013228	1.66113e-05	0.000177938	7.55048e-05	5.27184e-05	5.15721e-05	0.000120562	3.32213e-05	8.5505e-05	0.000374362	0.000124617	0.000717223	6.49432e-05	5.63816e-05	0.000134611	0.000163223	3.92793e-05	4.11329e-05	0.000888619	5.28856e-05	0.000207503	0.000166476	0.000487457	0.000142822	0.00018637	0.000117664	0.000178037	8.70493e-05	0.000157346	3.78405e-05	6.27071e-05	4.28238e-05	0.000210848	2.01506e-05	4.77044e-05	9.52635e-05	5.57522e-05	5.37169e-05	0.000101636	7.19908e-05	0.000245224	4.01502e-05	0.000413401	0.00046055	0.000111013	0.000173862	0.000715271
ko03040	ko03040: Spliceosome	0.000333084	0.00081342	0.000154956	0.000404233	0.000521065	0.000350197	0.000513825	0.000547541	0.000338949	0.00162581	0.00329913	0.00102907	0.00513624	0.000521668	0.000263187	0.000552137	0.000475905	0.000134979	0.000235164	0.00789015	0.00028228	0.00183417	0.000625745	0.00286889	0.000930747	0.00116222	0.00100381	0.0013547	0.000556128	0.00101464	0.000413023	0.000234127	0.000242044	0.00117208	0.000131206	0.000229931	0.000225327	0.000358982	0.000314497	0.000856574	0.00045708	0.00258907	0.000576449	0.0027665	0.00254873	0.000596517	0.000514304	0.00452286
ko00140	ko00140: Steroid hormone biosynthesis	2.17943e-05	0.000159519	3.15749e-05	4.4513e-06	9.36653e-05	0.000140497	1.25799e-05	1.16288e-05	3.09722e-05	6.99333e-06	0.000124132	5.03136e-05	0.000394174	7.32066e-05	0.00010291	0.000121654	6.3658e-05	0	4.70491e-05	0.000663032	5.31461e-05	0.00013929	0.000303272	0.000111462	0.000115606	0.000179686	7.53502e-05	0.000163611	0.000136894	6.36531e-05	7.75879e-05	7.67981e-05	0.000115656	0.000196772	7.93526e-05	6.68926e-05	0.000204337	0.000116629	7.68911e-05	1.21364e-05	7.74907e-05	0.000265608	3.06723e-05	0.000105877	0.000132586	8.33153e-06	1.68849e-05	0.000295102
ko05200	ko05200: Pathways in cancer	4.8317e-06	2.0678e-05	3.52707e-06	2.33948e-05	4.64938e-06	1.90415e-06	1.0189e-05	1.73782e-06	8.52034e-06	6.28006e-06	4.09221e-05	1.22037e-05	1.94767e-05	9.90788e-06	3.02537e-06	2.22512e-05	1.51825e-05	0	1.82666e-06	3.92251e-05	5.11135e-06	7.82335e-06	5.31987e-05	1.61305e-05	1.49161e-05	8.71548e-06	9.79113e-07	3.23934e-06	7.23683e-06	5.35982e-06	4.91252e-06	1.53423e-06	1.56979e-05	8.84338e-06	1.45114e-06	2.67678e-06	3.18723e-05	1.04291e-05	7.303e-06	1.53281e-06	9.585e-06	9.77857e-06	3.42494e-06	1.43207e-05	9.36352e-06	2.24597e-05	3.80798e-05	1.93096e-05
ko04540	ko04540: Gap junction	0	0	1.17841e-06	0	2.67679e-06	0	0	0	0	0	0	9.21485e-07	4.57343e-06	0	0	0	0	0	0	1.0425e-05	4.27009e-06	2.63513e-06	7.16309e-06	1.26011e-05	0	0	0	0	0	2.13842e-06	2.75084e-06	0	0	1.06921e-05	0	0	0	0	0	0	0	0	0	5.03889e-06	0	5.69659e-06	0	3.2369e-06
ko01056	ko01056: Biosynthesis of type II polyketide backbone	0	0	1.19313e-05	6.75881e-06	4.3361e-06	1.06195e-05	2.55122e-06	6.80472e-06	1.924e-06	4.65789e-06	1.37143e-05	8.94609e-06	3.78613e-05	8.71152e-05	2.55162e-07	8.56934e-05	0	0	1.99943e-05	1.91836e-05	3.58115e-06	8.17177e-06	8.41316e-06	7.19054e-06	2.31149e-05	6.14211e-05	0	2.94983e-06	0	2.66911e-05	8.37965e-06	5.19796e-05	2.61132e-06	6.74863e-06	0	1.62951e-05	0.000136561	8.94981e-07	0	7.58458e-06	7.16017e-05	3.49106e-06	2.24169e-06	1.45096e-06	5.64929e-06	1.94992e-05	4.12582e-05	4.25988e-05
ko04621	ko04621: NOD-like receptor signaling pathway	7.63347e-07	5.71255e-05	0.000158597	0.000100877	4.30204e-05	2.58595e-05	1.22049e-05	4.87971e-05	1.56732e-05	4.37077e-06	2.94664e-05	3.55985e-05	9.842e-05	2.25853e-05	5.89697e-06	3.22891e-05	2.66036e-05	1.90163e-06	4.02727e-05	0.000115524	2.73e-05	4.16707e-05	8.49744e-05	0.00010665	1.05249e-05	3.24744e-05	0	3.57477e-05	7.96979e-05	2.27326e-05	3.45663e-05	2.19998e-05	0.00014646	4.16835e-05	3.1824e-05	3.60679e-05	1.52473e-05	2.67938e-05	1.27078e-05	6.93564e-05	5.38987e-05	5.20068e-05	1.99992e-05	5.13853e-05	1.60973e-05	3.58945e-05	3.5338e-05	0.000117492
ko00533	ko00533: Glycosaminoglycan biosynthesis - keratan sulfate	0	0	0	0	5.95645e-06	8.49836e-08	0	0	8.83495e-07	1.39019e-09	1.5218e-07	3.77877e-07	3.97348e-06	0	3.22427e-07	0	0	0	6.07323e-08	1.5447e-06	1.00414e-06	1.04717e-05	2.04668e-05	5.70713e-05	0	0	0	0	3.44684e-05	2.29849e-09	5.34185e-05	0	0	8.07437e-08	1.37416e-05	5.15744e-06	0	0	1.93825e-05	0	0	0	1.19044e-06	6.95076e-08	0	0	0	0
ko00120	ko00120: Primary bile acid biosynthesis	3.51428e-05	5.28368e-07	0	0	2.25377e-06	0	0	0	7.15218e-06	7.73296e-06	1.17229e-07	2.93331e-06	1.05737e-05	2.61734e-05	0	0	0	0	0	0	2.18111e-06	1.57688e-06	0	1.65999e-08	1.30043e-09	0	0	0	0	0	0	0	0	0	0	0	0	0	0	0	0	0	0	2.86401e-07	2.05423e-09	0	0	0
ko00534	ko00534: Glycosaminoglycan biosynthesis - heparan sulfate	1.64128e-05	0.000219951	2.04054e-05	5.04329e-05	4.91108e-05	2.06321e-05	0	0.000107899	2.33084e-05	0	4.98626e-05	1.32177e-05	1.04754e-05	7.92743e-05	0.000100769	4.26705e-05	0	4.00804e-06	6.67276e-06	1.9986e-05	3.51945e-06	3.79753e-05	2.48351e-05	4.8805e-05	3.53732e-06	1.45758e-09	0.000625584	0.000685669	0	1.35524e-05	1.4053e-05	3.27459e-05	0	4.68274e-05	1.80029e-08	5.50722e-05	7.59566e-06	0	9.12431e-06	3.82893e-07	0	1.0138e-08	3.13101e-05	4.582e-05	5.78208e-05	0.00016167	0.000132015	2.95548e-05
ko05211	ko05211: Renal cell carcinoma	0	0	0	0	0	0	0	0	1.89175e-07	0	0	3.88746e-07	0	0	0	0	0	0	0	9.80717e-09	0	1.4045e-09	0	0	0	0	0	0	0	0	0	0	0	4.30079e-06	0	0	0	0	0	0	0	0	0	1.24881e-06	0	0	0	0
ko04912	ko04912: GnRH signaling pathway	0	0	0	0	2.29309e-06	0	0	0	1.90228e-06	0	0	9.89544e-07	0	0	0	0	0	0	0	2.54035e-06	1.85997e-07	1.70584e-06	0	0	1.79561e-06	0	0	0	0	9.00337e-07	0	0	0	6.95669e-06	0	4.4454e-07	0	0	4.95392e-06	0	9.10767e-08	0	0	1.69245e-06	1.97889e-06	2.16258e-06	0	0
ko05212	ko05212: Pancreatic cancer	0	0	0	0	0	0	0	0	0	0	0	0	0	0	0	0	0	0	0	0	0	0	0	0	0	0	0	0	0	0	0	0	0	0	0	0	0	0	0	0	0	0	0	0	0	0	0	0
ko00522	ko00522: Biosynthesis of 12-, 14- and 16-membered macrolides	1.31018e-05	6.54754e-06	3.64363e-06	3.67657e-06	3.88349e-06	7.32198e-06	8.42863e-07	8.38653e-06	7.30695e-06	1.74767e-05	6.6714e-06	1.03471e-05	1.14326e-05	4.34062e-06	1.13209e-05	5.19524e-06	1.04303e-06	4.58132e-06	6.14348e-06	8.48336e-06	1.03706e-05	1.43244e-05	1.55752e-06	6.28899e-06	1.44566e-05	1.51772e-06	4.19283e-06	7.78442e-06	0	3.17673e-06	6.73037e-06	8.29558e-06	8.80847e-06	1.38574e-05	6.88734e-06	2.01865e-05	2.70579e-06	3.06615e-06	4.7851e-06	1.98626e-05	2.21682e-06	4.58634e-06	1.41895e-05	1.39333e-05	5.65779e-06	2.12798e-05	2.90669e-05	9.65056e-06
ko04662	ko04662: B cell receptor signaling pathway	0	1.12134e-05	0	0	1.86015e-06	0	3.72823e-05	0	1.31742e-06	2.94183e-06	0	0	2.91103e-06	4.20976e-07	0	7.70651e-06	0	0	1.76646e-06	3.60622e-09	9.32698e-07	4.01686e-07	0	6.18936e-07	0	0	0	0	0	0	0	2.42107e-07	0	4.30202e-06	2.95665e-08	0	0	4.60987e-07	0	3.08286e-10	1.22714e-10	0	7.02049e-06	1.32229e-06	5.62504e-06	5.96553e-07	0	0
ko00643	ko00643: Styrene degradation	0.00067859	0	0.00107633	0	0.00124558	0	0	0	0	0	0	0.00119725	0.00114445	0.00100425	0	0	0	0	0.00189885	0	0.000742735	0.00108122	0	0	0	0	0	0	0	0.000926487	0	0	0	0.00128177	0.000460918	0	0	0	0.00174973	0	0	0	0.000757611	0.00097826	0.00170828	0.000797004	0	4.64938e-06
ko05020	ko05020: Prion diseases	3.75002e-05	5.31402e-05	4.04412e-06	0	6.01156e-05	3.58891e-05	9.19116e-05	0	1.18156e-05	0.000111687	0.00053404	7.30624e-05	0.000456772	1.32951e-06	1.09328e-05	3.80238e-05	9.56764e-05	0	3.31135e-05	0.000670604	1.08945e-05	0.000161141	9.4367e-05	0.000206115	7.56699e-05	5.49292e-05	0.000146527	0.00012694	4.19922e-05	0.000108824	2.4524e-05	1.76325e-05	0	0.000136472	3.87467e-07	7.15998e-06	0	0	8.52296e-07	4.93844e-05	4.11231e-05	0.000213201	2.05938e-10	0.000358079	0.000225518	2.46118e-05	6.01369e-05	0.0002931
ko05412	ko05412: Arrhythmogenic right ventricular cardiomyopathy (ARVC)	0	0	3.20992e-06	0	0	0	7.21698e-06	0	0	0	0	3.30259e-07	3.72335e-06	0	0	3.9583e-08	0	0	1.77422e-06	5.12612e-06	2.57642e-10	9.49876e-07	0	7.0413e-07	6.87579e-07	1.26784e-05	0	0	0	2.46741e-07	1.03985e-06	0	8.5649e-06	0	0	0	0	0	0	0	1.96883e-08	0	0	1.12238e-10	7.72426e-07	6.06328e-07	3.06973e-06	3.19929e-08
ko04976	ko04976: Bile secretion	1.22931e-05	4.20165e-05	4.92217e-07	8.74278e-06	1.51533e-06	2.14264e-05	3.86332e-06	1.66576e-05	4.43164e-07	1.44058e-05	0	1.08481e-06	1.79131e-06	5.99895e-06	1.73563e-06	1.54939e-05	1.55192e-05	0	1.14431e-06	1.37556e-06	2.91594e-06	1.77542e-06	2.90456e-05	5.63926e-06	0	0	9.50196e-07	2.02649e-06	1.01849e-05	5.06739e-06	4.92076e-06	8.48449e-06	0	6.15984e-06	4.33305e-06	6.64272e-07	0	8.13898e-06	1.73833e-06	2.34816e-05	3.04546e-06	0	9.11326e-06	1.24943e-06	2.8965e-06	2.92862e-05	2.78546e-06	3.57621e-06
ko05340	ko05340: Primary immunodeficiency	8.47734e-05	0	0	0	0	0	0	0.000116588	0	0	0	0	0	1.77492e-05	2.32376e-05	0	2.14652e-05	3.05704e-07	0	2.17677e-05	0	1.31064e-06	0	0	0	0	0	0	0	0	0	0	8.58667e-05	0	0	0	0	1.58961e-08	0	0	0	0	0	4.65404e-06	0	0	1.43001e-05	0
ko04742	ko04742: Taste transduction	2.87441e-05	0	3.34761e-06	0	1.15076e-09	3.43027e-06	0	3.49652e-05	1.17624e-06	6.69062e-06	2.36811e-05	6.72788e-06	4.06526e-05	0	5.76427e-06	1.35544e-05	3.49591e-05	9.14653e-06	0	7.26292e-05	1.86371e-06	0	5.37195e-05	0.000126337	3.84732e-05	4.19009e-05	0	4.03426e-05	4.05304e-05	9.93097e-06	4.90338e-10	6.67968e-06	1.34453e-05	0	0	7.41092e-06	7.45075e-06	0	0	0	0	1.96943e-06	0	0	3.39847e-05	1.90634e-05	0	2.56911e-05
ko03015	ko03015: mRNA surveillance pathway	0.000121494	0.000244475	4.43238e-05	0	0.000169827	0.000135881	0.000187238	0.000267086	0.000133815	0.000976509	0.00147171	0.000468114	0.00262634	0.000155617	4.33698e-05	0.000205601	0.000227348	0	7.81089e-05	0.00406147	0.000100355	0.000898811	0.000302795	0.0011509	0.000487739	0.000562998	0.000429107	0.000628639	0.000276188	0.000520881	0.000184727	8.82363e-05	0	0.000561277	6.64021e-05	0.000103442	0	0.00012873	0.000109835	0.000590422	0.000141644	0.00131799	0.000166991	0.00170923	0.00178792	0.000193851	0.000246323	0.00239743
ko00710	ko00710: Carbon fixation in photosynthetic organisms	1.35853e-06	3.85626e-05	6.5227e-06	3.49223e-06	1.4256e-05	7.81044e-06	0	5.10474e-07	3.20555e-06	1.60886e-06	1.90787e-06	5.01644e-06	2.22287e-05	3.93249e-05	3.95972e-05	0.000177301	7.26117e-05	0	8.41007e-06	5.26691e-06	8.87228e-06	1.46555e-05	1.00701e-05	1.26688e-05	1.56098e-06	0	0.000151664	0.000126114	5.61123e-06	5.32867e-06	2.79078e-06	5.41073e-06	7.16627e-07	2.37109e-05	0	2.39041e-06	0	1.28417e-06	1.68342e-05	1.99183e-06	2.91544e-06	0	4.78158e-05	4.01382e-06	1.44749e-05	3.57107e-06	0.000210584	5.62873e-06
ko04971	ko04971: Gastric acid secretion	2.98803e-05	0	4.89511e-06	0	1.08462e-05	0	9.48951e-06	0	3.51271e-07	0	0	1.25645e-06	0	0	0	0	0	0	0	0	0	1.00966e-06	0	1.01566e-06	0	0	0	0	0	0	7.7853e-06	3.48127e-06	0	9.30281e-06	0	1.54568e-06	0	1.67808e-05	0	7.02751e-06	0	0	4.75334e-06	2.17859e-06	0	1.89804e-05	3.52715e-05	0
ko05110	ko05110: Vibrio cholerae infection	0	0	5.34342e-05	0	0.000338708	4.3884e-05	0	0	3.43635e-05	0.000216714	0.000440306	3.30719e-05	0.000339485	1.47155e-05	8.68629e-06	3.64411e-05	0	0	1.59518e-06	0.000392615	1.45999e-05	6.8853e-05	0	6.15295e-05	4.96651e-05	5.36927e-05	0.00014598	7.25718e-05	2.82241e-05	0.000636516	3.28078e-05	2.74788e-05	0	0.000640327	1.53595e-05	2.60777e-05	0	1.44306e-05	8.15417e-05	6.75432e-06	2.56131e-05	6.85569e-05	3.56986e-05	9.2694e-05	0.000209499	7.75132e-05	0	0.000371629
ko03050	ko03050: Proteasome	0.00163275	0.00195266	0.00043585	0.0014502	0.000998986	0.000822658	0.001467	0.00218436	0.00109746	0.00292745	0.00566596	0.00162772	0.00599077	0.0017306	0.000507326	0.00153833	0.00199742	0.000665827	0.00099354	0.00827268	0.00139528	0.00277473	0.00224583	0.00430207	0.00174448	0.00231945	0.00202145	0.00276251	0.00158272	0.00203674	0.00101839	0.00150412	0.000555409	0.00207668	0.00121216	0.000608957	0.000318682	0.000985025	0.000343997	0.0018432	0.00136635	0.00358262	0.00176123	0.00429268	0.003952	0.00137641	0.00112186	0.00576832
ko04075	ko04075: Plant hormone signal transduction	0	0	2.6252e-06	0	7.47535e-07	0	0	0	3.58522e-07	0	2.50535e-06	9.65133e-07	9.10538e-07	7.97268e-06	0	0	0	0	0	1.84282e-06	7.24791e-07	2.42187e-07	5.75206e-06	0	0	1.06033e-06	0	3.76508e-07	0	3.91336e-07	0	0	0	0	0	0	0	0	0	0	0	6.14368e-07	0	7.13946e-07	9.73307e-08	3.22706e-06	0	4.72388e-06
ko04672	ko04672: Intestinal immune network for IgA production	0	0	0	0	0	0	4.96258e-05	0	0	0	0	0	0	0	0	0	0	0	0	0	2.33668e-06	0	0	0	0	0	0	0	0	0	0	0	0	0	0	0	0	0	0	0	0	0	0	0	0	0	0	0
ko04020	ko04020: Calcium signaling pathway	1.40667e-06	4.67081e-05	3.93215e-06	0	3.18811e-05	1.49298e-05	7.73705e-06	0	0	0	0	4.61743e-05	0.000260369	3.78205e-06	2.7357e-06	0	3.02832e-05	0	4.31042e-06	0.000258077	8.22957e-06	0	7.06352e-05	0	3.74411e-05	4.53573e-05	0	0	3.07853e-05	4.36613e-05	2.01147e-05	1.75797e-06	0	5.94806e-05	0	1.47308e-05	0	0	1.18552e-05	4.29398e-05	1.54434e-05	0	3.85009e-05	0	0	2.64903e-05	4.86579e-05	0.000204838
ko04960	ko04960: Aldosterone-regulated sodium reabsorption	0	1.47825e-05	3.36821e-06	5.16552e-05	7.31174e-07	0	0	2.89399e-06	3.12134e-06	0	0	2.18085e-06	2.68016e-05	6.71657e-07	0	2.36516e-05	0	3.80146e-05	0	9.34508e-06	9.46769e-08	7.24585e-06	5.67707e-05	1.44686e-05	5.52897e-06	5.71251e-06	0	2.12306e-06	8.8622e-08	1.02976e-05	0	0	5.55407e-05	4.72236e-08	2.76408e-07	5.79434e-06	0	0	0	0	0	2.34452e-05	3.77226e-06	1.98806e-06	5.58815e-06	1.00179e-05	0	1.24323e-05
ko04711	ko04711: Circadian rhythm - fly	5.00991e-05	0.000587283	7.42095e-05	0	4.71529e-05	1.56845e-05	4.19253e-05	0.000122939	3.09506e-05	0.000286557	0.000582615	8.6417e-05	0.000738478	3.58241e-05	2.92217e-05	0.000260648	9.10089e-05	0	9.766e-07	0.000921983	3.84933e-05	0.000222777	6.95756e-05	0.000544589	0.000125629	5.245e-05	0.000412656	0.000202942	9.23827e-05	0.000105844	4.3986e-05	2.21058e-06	0	0.000155924	7.942e-07	1.70381e-05	5.30602e-05	1.98088e-05	0.000114731	0	8.09025e-05	0.000381316	6.59329e-05	0.000484882	0.000539539	7.97046e-06	8.64444e-05	0.000644905
ko00604	ko00604: Glycosphingolipid biosynthesis - ganglio series	0	8.11811e-05	6.08391e-06	0.000116061	1.57355e-05	1.05271e-05	7.06141e-05	6.82066e-05	6.62318e-06	0.000180179	5.51901e-05	3.84596e-05	0.000167059	1.13678e-05	0	3.64487e-05	6.62087e-05	0	7.49827e-06	0.000240002	0	6.17389e-05	0	0.000179065	3.16703e-05	9.28013e-05	0.000113282	8.55672e-05	0	2.65357e-05	0	0	0	4.98296e-05	0	1.36597e-05	0	0	0	6.42835e-05	1.32723e-05	4.83119e-05	0	0.00018484	0.000111342	4.57299e-05	0	0.000152424
ko04011	ko04011: MAPK signaling pathway - yeast	0.000198308	0.000234665	4.99441e-05	0.000135416	0.000131131	8.82836e-05	7.70118e-05	0.000181447	6.75735e-05	0.00111448	0.00182713	0.000406357	0.00206613	7.93685e-05	3.39208e-05	0.00013512	0.000226222	1.50148e-05	6.08567e-05	0.00265382	7.36499e-05	0.000737165	3.24487e-05	0.00113946	0.000368034	0.000197445	0.000417133	0.000479594	0.000103383	0.000358365	0.000139497	6.75317e-05	1.10393e-05	0.000430638	4.22001e-05	0.000107804	0.000253132	0.000119637	7.88056e-05	0.000192094	0.000124361	0.00101416	0.000214318	0.00109576	0.00106981	9.8037e-05	6.84489e-05	0.00167229
ko04530	ko04530: Tight junction	0.000712209	0.000221423	2.41861e-05	0	0.000218353	0.000143582	0.000342744	0.000609015	6.87736e-05	0.000192541	0.000352208	9.77825e-05	0.000576483	1.86168e-05	0.000169714	0.000172237	0.000380772	0.000502663	5.38374e-05	0.000828706	2.57652e-05	0.000163885	0.000622674	0.000323003	0.000148376	0.000655287	0.000179335	0.000213231	0.000104026	0.000131648	9.16244e-05	8.07741e-05	5.94561e-05	0.000161885	1.48574e-05	6.602e-05	0.00073383	0.00011001	5.10595e-05	0.000533722	7.53595e-05	0.000473471	2.45508e-05	0.000351313	0.000317301	9.54987e-05	0.000252889	0.000584412
ko04970	ko04970: Salivary secretion	0	0	0	0	3.81521e-06	0	0	0	3.93012e-06	0	2.73289e-05	8.00492e-07	0	0	0	2.05953e-05	3.08253e-05	0	0	0	2.30302e-06	4.34518e-06	0	0	0	0	0	0	1.48066e-05	0	2.33582e-06	4.47186e-07	0	1.64707e-06	0	3.86964e-06	1.49849e-05	0	0	0	0	0	0	0	0	3.50262e-06	1.83028e-05	8.94491e-06
ko04664	ko04664: Fc epsilon RI signaling pathway	0	0	0	0	5.072e-06	0	0	0	2.31256e-05	0	0	1.47257e-05	4.17943e-06	0	0	0	0	0	0	5.04642e-06	7.7805e-06	9.04247e-06	0	1.91847e-05	0	0	0	0	0	0	1.55342e-05	0	4.48674e-05	1.66143e-05	0	0	0	0	0	0	0	1.86229e-05	0	1.36955e-06	6.60771e-06	6.92392e-06	0	3.7326e-06
ko00523	ko00523: Polyketide sugar unit biosynthesis	0	0	0	0	0	0	0	0	0	0	0	0	0	0.00217357	0	0	0	0	0	0	0	0	0	0	0	0	0	0	0	0	0	0	0	0	0	0	0	0	0	0	0	0	0	0	0	0	0	0
ko05210	ko05210: Colorectal cancer	0	0	0	0	0	0	0	0	0	0	0	0	0	0	0	0	0	0	0	0	0	0	0	0	0	0	0	0	0	0	0	0	0	4.30079e-06	0	0	0	0	0	0	0	0	0	0	0	0	0	0
ko04370	ko04370: VEGF signaling pathway	0	0	3.05015e-06	0	0	3.71056e-06	0	0	0	0	0	1.40973e-08	0	0	0	0	0	0	3.92498e-06	0	0	0	0	0	0	2.86507e-06	0	0	0	1.18698e-06	0	0	0	0	0	0	0	1.80725e-05	0	0	0	0	0	0	0	0	0	0
ko04520	ko04520: Adherens junction	0	0	0	0	2.39373e-05	1.53901e-05	0	0	1.0333e-05	0	0.000270616	6.89072e-05	0.000398077	2.38134e-05	2.617e-05	4.68693e-05	9.99153e-05	0	0	0.000498053	2.09631e-05	0.000111563	2.10618e-05	0.000292807	0	0.000185962	9.32439e-05	0.00014896	7.27314e-06	8.38208e-05	2.08431e-05	0	0	0.000109412	0	1.42876e-05	0	0	0	0	0	0.000220363	0	0.000255804	0.000274535	1.28211e-05	5.42817e-05	0.000383071
ko00514	ko00514: Other types of O-glycan biosynthesis	5.45973e-05	0.000143856	1.20022e-05	8.45864e-05	9.21747e-05	4.49317e-05	5.02513e-05	0.000100084	4.16211e-05	9.44176e-05	0.000495672	0.00016313	0.000796191	2.44246e-05	2.65923e-05	9.96033e-05	0.000199165	0	2.20213e-05	0.000992749	2.73086e-05	0.000283167	0.000257561	0.000420379	0.000142886	0.000251512	0.000309647	0.000169098	2.51805e-05	0.000159609	4.97036e-05	4.64511e-05	2.80223e-05	0.000258374	1.86721e-05	4.45936e-05	0	2.85993e-05	8.79237e-06	0.0001861	3.51309e-05	0.000442163	4.63406e-05	0.000390462	0.000389234	0.00010293	0.000122162	0.000790745
ko04062	ko04062: Chemokine signaling pathway	1.66394e-05	0	0	0	2.93359e-06	0	0	3.67192e-06	5.90126e-06	8.02996e-06	1.07475e-05	3.61764e-06	1.95336e-05	0	4.09879e-06	0	8.33241e-06	0	1.91263e-07	3.34117e-05	1.01838e-06	7.34212e-06	7.41753e-06	1.22577e-05	1.6966e-06	0	8.75139e-06	6.62024e-06	3.47861e-06	1.17504e-06	8.71393e-07	0	0	6.97038e-06	9.4762e-06	1.01447e-06	0	7.09427e-06	4.21623e-06	3.19425e-06	0	1.01304e-05	4.8995e-06	2.25719e-05	1.3733e-05	6.09567e-06	2.11206e-05	2.39386e-05
ko04745	ko04745: Phototransduction - fly	0	4.51337e-08	1.6264e-06	0	3.16996e-06	1.90551e-07	2.53642e-07	0	2.19342e-08	2.51181e-07	1.49199e-06	2.72178e-06	3.09561e-06	0	2.35704e-07	1.00972e-05	0	1.34639e-08	6.24559e-10	6.27199e-06	1.98301e-06	2.12198e-06	1.30134e-05	4.31404e-06	1.0701e-07	0	0	0	0	2.82518e-06	9.77051e-07	0	9.79061e-06	3.92759e-06	8.74505e-08	9.848e-06	0	0	3.72426e-06	0	0	1.26816e-06	0	7.20176e-06	4.7701e-06	1.24595e-05	1.88434e-05	1.66275e-05
ko05160	ko05160: Hepatitis C	0	1.49199e-07	0	0	0	0	0	0	0	0	0	4.00508e-07	0	0	0	0	0	0	0	3.85111e-06	0	0	0	0	0	0	0	0	0	9.49485e-07	0	0	0	0	0	0	0	0	0	0	0	0	0	0	0	0	0	0
ko00195	ko00195: Photosynthesis	5.46232e-05	2.82272e-05	0.00014846	3.45289e-05	0.00016007	5.02424e-05	9.25464e-06	3.09062e-05	1.03881e-05	0	3.18881e-05	4.10536e-05	0.000177149	0.000774602	3.16799e-05	0.000277746	1.35874e-06	0	0.000104012	8.59824e-05	0.00068399	3.43381e-05	0.000279447	0.000163268	3.86024e-05	1.13908e-05	0	7.90434e-06	7.39384e-06	1.04232e-05	7.79723e-05	0.000387718	0	1.31646e-05	2.34302e-05	3.07154e-05	0	0.000185358	2.55054e-05	2.68345e-05	7.59581e-06	4.61158e-05	3.79787e-06	5.56826e-05	9.09844e-05	2.28176e-05	4.2054e-06	0.000116302
ko04144	ko04144: Endocytosis	5.8467e-05	0.000279341	4.15118e-05	0.000191243	0.000124342	9.15323e-05	8.37656e-05	0.000178365	7.50094e-05	0.00063754	0.00147159	0.000359857	0.0020668	0.000129593	5.26518e-05	0.000211363	0.00023455	2.40738e-05	4.78241e-05	0.00297114	8.32e-05	0.000646903	0.000248013	0.00125847	0.000290764	0.000263295	0.000355147	0.000303342	0.000210856	0.000325796	0.000106161	4.99431e-05	2.23503e-05	0.000425643	3.08267e-05	5.35447e-05	5.93518e-05	9.90795e-05	7.73433e-05	0.000188269	0.000125372	0.000950734	0.000158755	0.00111088	0.00125859	0.000199672	0.00031858	0.0018071
ko00363	ko00363: Bisphenol degradation	0.00251537	0.0031391	0	0	0.00300172	0.00330555	0	0.00317995	0.00217201	0.00482077	0.00346198	0.00203179	0	0	0.00261758	0.00168023	0.00208636	0	0.00318533	0	0.00337886	0.00230935	0	0	0.00202163	0.00421251	0	0	0	0.00364959	0.00328177	0.00377091	0	0.00244005	0.0030014	0.00269641	0	0.00334246	0	0.00258709	0.00313108	0.0026874	0.0033544	0.00278045	0.00322815	0.00203369	0.00159879	0
ko03320	ko03320: PPAR signaling pathway	3.07998e-06	8.16137e-05	3.27577e-06	0	2.79281e-05	1.4255e-05	0	8.23705e-05	1.81811e-05	0.0001102	0.000297559	6.22242e-05	0.000345584	2.96675e-06	1.17074e-05	0.000103741	9.19645e-05	1.01513e-05	7.02637e-06	0.000517256	6.42145e-06	9.61549e-05	0.000145786	9.63286e-05	9.03424e-05	7.01613e-05	0.000124659	0.000132643	5.68828e-05	8.02654e-05	1.20564e-05	0	2.94293e-05	8.09135e-05	3.72191e-06	1.04764e-05	0	7.11203e-06	1.22608e-07	6.83184e-05	2.49229e-05	0.000186682	1.12751e-05	0.000142307	0.000188899	8.51996e-06	4.31547e-05	0.000353666
ko04962	ko04962: Vasopressin-regulated water reabsorption	0	0.000160118	3.93986e-05	0	6.45649e-05	7.02984e-05	6.52846e-05	0.000172168	6.15536e-05	0.000551305	0.00142797	0.000236012	0.00138193	2.28584e-05	2.0426e-05	7.15017e-05	5.72847e-05	0	4.31377e-05	0.00200972	4.26146e-05	0.000452797	8.37065e-05	0.00072836	0.000276104	7.76761e-05	0.000205909	0.000351197	0.000136667	0.00025665	5.12538e-05	9.25674e-05	0	0.000266419	2.7871e-05	4.38462e-05	0	1.91374e-05	6.16685e-06	0.000176153	9.83813e-05	0.000699679	2.23424e-05	0.000662454	0.000387313	0.000110523	9.49314e-05	0.00117457
ko00945	ko00945: Stilbenoid, diarylheptanoid and gingerol biosynthesis	0	0	0	0	0	0	0	0	0	0	0	0	0	0	0	0	0	0	0	0	0	0	0	0	0	0	0	0	0	0	0	0	0	0	0	0	0	0	0	0	0	0	0	0	0	0	0	0
ko04013	ko04013: MAPK signaling pathway - fly	0	0	0	0	2.26416e-05	0	0	0	0	0	1.22296e-05	8.42003e-06	1.24764e-05	7.34725e-06	7.80492e-06	3.77167e-05	4.93592e-06	0	4.13272e-07	1.69131e-05	1.64595e-06	1.46869e-06	1.56478e-05	1.4166e-05	8.9518e-06	3.90384e-06	1.03031e-05	0	0	4.28667e-06	3.14344e-06	0	5.12791e-06	2.38034e-05	1.03529e-06	7.71107e-06	0	0	2.25464e-05	0	0	7.54786e-06	5.67974e-06	4.20966e-06	1.92893e-05	1.02595e-05	0	3.13652e-05
ko04140	ko04140: Regulation of autophagy	0.000184342	0.000420353	3.42235e-05	8.81193e-05	0.000155272	9.19706e-05	0.000241386	9.35593e-05	8.52962e-05	0.000710628	0.00169174	0.000282359	0.00177354	0.000183756	5.76219e-05	4.94589e-05	0.000106868	0	9.26244e-05	0.0029144	9.01885e-05	0.000557654	0.000295214	0.000822495	0.00034404	0.000319708	0.00044141	0.000373377	8.80193e-05	0.000384369	0.000112948	8.23703e-05	3.92437e-05	0.000574532	2.08455e-05	3.57435e-05	0.000111815	0.000235112	7.5705e-05	0.000237936	6.90608e-05	0.00105698	0.000131904	0.00138746	0.00171574	0.000177207	0.000133257	0.00214597
ko04113	ko04113: Meiosis - yeast	6.34751e-05	0.000111974	4.07387e-05	0.000251886	0.000121892	0.000153096	6.16358e-05	0.000106292	0.000103527	0.000500416	0.00134485	0.000330677	0.00182428	0.000131112	5.40813e-05	0.000105555	0.000177549	1.90119e-05	7.58095e-05	0.00240713	0.000147328	0.000644915	0.000192518	0.000937958	0.000423973	0.000409104	0.000589095	0.000440589	0.000162926	0.000463857	0.00017905	0.000126964	4.32402e-05	0.000345933	0.000114782	4.96467e-05	0.000117044	0.000121884	2.98614e-05	0.000319429	0.000326883	0.00080608	0.000201885	0.000979756	0.000908424	0.000100768	7.99504e-05	0.00148689
ko01057	ko01057: Biosynthesis of type II polyketide products	6.24393e-05	0	6.99897e-06	2.99259e-05	1.3813e-05	1.94713e-05	0.000116678	0	2.80902e-05	0	0	9.91811e-06	2.23153e-05	0.000175959	1.33506e-06	4.72638e-05	0	0	2.01348e-05	4.71567e-05	6.32233e-05	5.81833e-06	5.43437e-06	4.41327e-05	8.4836e-05	1.26809e-05	7.25893e-05	0	0	4.69816e-05	5.80021e-07	7.61739e-05	0	1.50532e-05	3.63388e-05	1.14559e-05	0	4.93751e-05	9.73074e-06	0	0.000144951	4.24472e-05	0.000151776	1.27766e-05	3.13382e-05	2.69178e-05	8.57797e-05	2.71995e-05
ko00532	ko00532: Glycosaminoglycan biosynthesis - chondroitin sulfate	0	1.69944e-05	2.04675e-06	0	1.4707e-05	0	0	0.000218238	0	7.04865e-06	1.16756e-05	1.97802e-06	1.43933e-06	2.36396e-08	8.08426e-06	9.99802e-06	1.58414e-05	7.58693e-07	1.31689e-06	3.95192e-06	2.33576e-06	1.3002e-06	4.37851e-05	1.34389e-06	0	0	0	0	1.46915e-08	1.88225e-06	0	0	0	3.28563e-10	0	7.79688e-06	0	0	0	0	0	0	1.45548e-06	1.99704e-06	4.81097e-06	0	0	1.91999e-05
ko00943	ko00943: Isoflavonoid biosynthesis	0	0	0	0	0	0	0	0	0	0	0	0	0	0	0	0	0	0	0	0	0	0	0	0	0	0	0	0	0	0	0	0	0	0	0	0	0	0	0	0	0	0	0	0	0	0	0	0
ko00563	ko00563: Glycosylphosphatidylinositol(GPI)-anchor biosynthesis	0.000278223	0.000567008	2.87416e-05	0.000519461	0.000288488	0.000273222	0.000328157	0.000416044	0.00015998	0.00103097	0.0030787	0.000517251	0.00301167	0.000179269	0.000165312	0.000307751	0.000399502	0.000274684	0.0001512	0.00450102	0.000175541	0.00116746	0.000138752	0.00161164	0.000591836	0.000626968	0.000745187	0.000690684	0.000419846	0.000521122	0.000280616	0.000185402	0	0.000630947	6.1963e-05	0.000117831	1.22531e-05	0.000318609	0.000134294	0.000478884	0.000324664	0.00166839	0.000426225	0.00158156	0.00117851	0.000385706	0.000469388	0.00223473
ko00402	ko00402: Benzoxazinoid biosynthesis	0	0	2.35134e-06	0	2.76551e-10	0	0	0	0	0	0	9.76536e-10	2.00644e-06	1.3453e-06	0	1.39664e-06	0	0	1.26792e-05	0	3.64021e-06	0	0	0	0	0	0	0	0	2.92051e-08	0	0	0	0	0	0	0	0	0	0.000118893	0	0	0	2.14125e-06	0	0	2.47536e-06	0
ko04130	ko04130: SNARE interactions in vesicular transport	0.000111613	0.000281493	0	5.40786e-05	0.000166653	2.33398e-05	0.000178251	0.000180318	0.000125127	0.000933361	0.00107416	0.000340123	0.0018173	0.000107492	1.15087e-05	0.000232861	0.000372747	8.9594e-06	4.17647e-05	0.0035759	7.635e-05	0.000766768	0.000263934	0.000757823	0.000345198	0.000356663	0.000542943	0.000551269	0.000131819	0.000312169	0.000108911	9.23678e-05	0	0.000429991	2.35354e-05	6.75718e-05	0	2.79873e-05	2.78628e-05	5.51374e-05	8.40065e-05	0.000729452	0.000126936	0.000845997	0.000864639	0.000168214	0.000387549	0.00161634
ko05310	ko05310: Asthma	0	0	1.32399e-05	0	1.74806e-05	0	0	0	0	0	0	0	0	0	0	0	8.59905e-06	0	0	0	0	2.67688e-06	0	0	0	6.92116e-06	0	0	0	0	6.98053e-06	0	0	1.04156e-05	0	0	0	0	9.71919e-06	0	0	0	0	0	0	3.49084e-06	1.55399e-05	0
ko04612	ko04612: Antigen processing and presentation	0	6.41727e-05	1.37061e-05	0.000184723	4.39546e-05	2.91275e-05	4.39804e-06	0.000125553	1.33412e-05	8.34939e-05	0.000203092	5.32812e-05	0.000406157	0	1.21881e-05	4.37998e-05	6.47837e-06	0	0	0.000407019	1.36565e-05	0.000112646	6.67429e-08	0.000172143	5.93231e-05	4.3035e-05	5.56525e-05	3.41194e-05	0	7.27472e-05	1.03558e-05	2.91282e-05	3.17887e-08	6.34393e-05	3.65835e-06	1.46959e-05	0	7.8566e-06	6.66306e-07	0	1.73985e-05	0.000161629	1.1531e-05	0.000186559	0.000236115	4.00498e-05	3.97901e-05	0.00031687
ko04712	ko04712: Circadian rhythm - plant	0	0	1.39045e-05	0	6.27162e-05	0	0.000114658	0	2.46666e-05	0	0.000549629	0.000150997	0.000958162	4.34938e-05	0	0	0	0	0	0.0012249	2.63147e-05	0.000233005	4.64857e-05	0.000599723	0.000216099	0.000399964	0	0.0003597	0	0.000191728	4.45224e-05	0	0	0.000238371	3.53642e-07	0	0	0	0	0	0.000114246	0.000482725	0	0.000630213	0.000669616	1.5408e-06	9.61888e-05	0.00093281
ko00512	ko00512: Mucin type O-Glycan biosynthesis	0	1.88069e-05	3.51191e-05	0	1.31533e-05	6.75826e-09	0	0	1.00977e-05	0	4.50331e-05	3.36372e-06	4.75101e-06	1.34993e-09	5.91655e-05	7.58072e-06	0	0	2.22987e-05	8.39306e-05	2.26156e-05	5.39453e-07	0.000471882	7.37646e-05	4.71999e-05	7.40463e-05	0	7.47069e-05	1.68124e-05	4.73404e-05	5.84583e-05	5.53755e-05	0	3.17936e-06	0	3.27598e-06	0	2.24559e-06	0	0.000183003	7.64784e-05	0	7.40284e-05	2.77874e-05	2.28393e-05	0.000140381	9.23622e-05	2.56501e-06
ko05145	ko05145: Toxoplasmosis	0	2.78898e-05	0	0	5.73274e-06	0	1.12969e-06	2.56162e-06	6.78122e-06	1.27388e-06	1.05352e-05	5.55269e-06	4.37703e-05	0	0	0	0	0	0	5.17758e-05	1.36657e-06	5.67889e-06	6.31347e-05	2.46228e-05	7.28497e-06	6.18206e-06	6.24192e-06	0	0	6.02785e-06	5.19191e-06	0	0	6.18719e-06	0	0	0	0	0	3.36195e-06	9.75698e-07	3.92164e-05	0	1.6657e-05	2.01338e-05	8.6125e-07	3.17543e-05	2.65249e-05
ko05221	ko05221: Acute myeloid leukemia	0	0	0	0	2.05421e-06	0	0	0	1.17956e-07	0	0	1.91753e-06	4.32929e-06	0	0	0	0	0	0	1.80677e-05	0	6.47595e-07	0	0	0	0	0	0	0	5.05747e-07	5.73813e-08	0	0	0	0	0	0	0	0	0	0	1.17041e-05	0	0	0	0	0	2.74003e-07
ko04914	ko04914: Progesterone-mediated oocyte maturation	0	0	1.18941e-05	0	7.70511e-05	0	0	0	2.73847e-05	0	0.000239122	7.37809e-05	0.000383096	0	0	0	0	0	0	0.000547117	1.55065e-05	0.000101728	8.76061e-05	0.000186654	5.83653e-05	0	0	0	0	0.000147955	2.80484e-05	0	0	8.96391e-05	0	0	4.71229e-05	0	0	0	0	0.000134513	0	0.00019133	0.000185928	5.04421e-05	0	0.000278133
ko04145	ko04145: Phagosome	3.90737e-05	0.00015238	4.55537e-05	0.000149554	0.000259915	2.73144e-05	8.25766e-05	0.000195712	5.09778e-05	0.000263716	0.000770343	0.000167964	0.00104205	7.91898e-05	1.82779e-05	4.60725e-05	0.000158993	2.11808e-06	2.93347e-05	0.00418865	4.53989e-05	0.000336106	0.000203514	0.000553133	0.000136336	0.000190677	0.000202837	0.000125639	8.05629e-05	0.000455058	6.14731e-05	2.0907e-05	1.70983e-05	0.000512712	2.80485e-05	3.41863e-05	0	5.54758e-05	5.54318e-05	7.77e-05	8.78342e-05	0.000498936	6.91533e-05	0.000551427	0.000549791	9.67728e-05	0.000186066	0.000875515
ko03450	ko03450: Non-homologous end-joining	7.64944e-05	0.000398512	3.23331e-05	8.14807e-05	0.000130205	1.62896e-05	2.93116e-05	4.46212e-06	0.000133335	0.000517032	0.00103313	0.000430334	0.00223695	0.000230186	8.34532e-05	0.000108712	0.000322551	0.000114936	8.64404e-05	0.00267874	4.86839e-05	0.000592918	7.99483e-05	0.00101088	0.000397766	0.000215627	9.67726e-05	0.000251548	5.52981e-05	0.000163025	9.51026e-05	1.97904e-05	1.6037e-05	0.000219607	2.59755e-05	2.07232e-05	0	3.29143e-05	0.000208537	0.000110071	4.33738e-05	0.0014094	0.000361487	0.00130901	0.0017107	0.000204043	4.87358e-05	0.00271425
ko05323	ko05323: Rheumatoid arthritis	0	0	1.87473e-05	0	0.000250507	0	0	0	0	0	0	0	0	0	0	0	0	0	0	0	0	0	0	0	0	0	0	0	0	0.000425123	0	0	0	0.000431017	0	0	0	0	0	0	0	0	0	0	0	0	0	0
ko00981	ko00981: Insect hormone biosynthesis	0	1.67991e-05	4.1303e-07	0	3.61041e-06	5.54818e-06	0	0	0	0	1.25504e-09	4.33387e-06	4.72492e-06	1.16399e-05	0	2.28248e-05	3.03962e-06	0	1.27706e-05	9.63081e-06	1.41385e-06	1.05125e-06	1.29507e-05	0	1.35628e-06	0	0	0	0	7.30587e-06	0	1.59486e-06	0	1.62336e-05	0	0	0	0	2.19658e-05	0	1.51342e-06	0	9.52448e-06	2.21732e-06	1.22364e-06	0	1.61439e-06	2.2081e-06
ko00253	ko00253: Tetracycline biosynthesis	0	3.71e-06	0	0	0	0	0	0	0	0	0	0	0	0	0	0	0	0	0	0	0	0	0	0	0	0	0	0	0	0	0	0	0	0	0	0	0	0	0	0	0	0	0	0	0	0	0	0
ko05012	ko05012: Parkinson's disease	6.19604e-06	1.74751e-06	2.52917e-07	0	1.16651e-05	3.36886e-06	5.32734e-06	4.54215e-05	1.34456e-05	7.83816e-05	0.000260838	1.88458e-05	9.8434e-05	4.84911e-06	5.48204e-06	3.64841e-05	6.72866e-06	0	1.28528e-06	0.000117031	9.62792e-07	8.05363e-05	6.94282e-05	0.000154819	8.08133e-06	6.08086e-06	5.00725e-05	7.71958e-05	7.62214e-05	1.37553e-05	3.75247e-06	2.87535e-06	1.42485e-05	1.40734e-05	6.57746e-07	6.56266e-06	0	1.1211e-05	1.76232e-10	1.80993e-05	1.55391e-05	0.000145726	2.03189e-07	0.000151138	0.000125969	8.13711e-06	1.66002e-05	7.95561e-05
ko05143	ko05143: African trypanosomiasis	7.73534e-07	0.000787689	0.000331517	0	0.000682844	0	0.000575662	0	0.00127602	0	1.02945e-06	0.00132732	0.00067724	1.62937e-06	0	0.00114838	0	0	0.000786515	0.000549168	0	0	0	0	0.0015725	0	0	0	0	0.000406229	0.000595505	0	0	0.000932835	1.26316e-09	1.08777e-07	0	0	0.000256959	0.000726132	0	0.00122916	0	0.000801015	0	0.00136361	0	0
ko03022	ko03022: Basal transcription factors	0.000112658	0.000500163	6.92171e-05	0.000738407	0.000174598	0.000180524	0.000328616	0.000441884	0.00016128	0.00191477	0.00294364	0.000729493	0.00438615	0.000193205	0.000119406	0.000314874	0.000241479	2.38703e-05	0.000101479	0.0083674	8.6563e-05	0.00160353	0.000444782	0.00218444	0.000684251	0.0011655	0.00119775	0.00134939	0.000533689	0.000896065	0.000171237	0.000191327	0.000106679	0.000817183	5.39779e-05	8.17998e-05	0.000112216	0.000206677	0.0001538	0.000975469	0.000242569	0.0020393	0.000252613	0.0024048	0.00173565	0.000262515	0.000251346	0.00388306
ko05332	ko05332: Graft-versus-host disease	0	0	0	0	0	0	0	0	0	0	0	0	0	0	0	0	0	0	0	0	0	0	0	0	0	0	0	0	0	0	0	0	0	0	0	0	0	0	0	0	0	0	0	0	0	0	0	0
ko04744	ko04744: Phototransduction	0	0	0	0	8.01019e-05	0	6.07989e-06	0	6.11147e-05	2.48368e-05	0.000440742	5.70977e-05	0.000511835	0	0	0	5.39921e-05	0	0	0.000479391	2.34535e-05	0.000258191	0	0	0	0	0.000144877	0	0	1.94817e-05	2.40674e-05	0	0	0	0	1.16452e-05	0	0	0	5.34341e-05	0	0.000329851	0	0.000192774	0.000223018	4.37595e-05	8.99889e-05	0.000431597
ko04120	ko04120: Ubiquitin mediated proteolysis	0.00994789	0.0164304	0.000861377	0.0186068	0.00361985	0.00215917	0.0120528	0.0144205	0.000747926	0.00233805	0.00375607	0.000532918	0.00289717	0.000929406	0.00342061	0.00467515	0.00547855	0.00591759	0.00131668	0.0043739	0.00027904	0.000870684	0.00904724	0.00293183	0.00165516	0.00799264	0.00889171	0.00677966	0.0105477	0.00165601	0.00200551	0.00245656	0.00655073	0.0030489	0.00182556	0.00141134	0.0384378	0.00558285	0.0046723	0.00315289	0.00293713	0.00604767	0.000847957	0.0018034	0.0021302	0.00138395	0.00197957	0.00375887
ko00100	ko00100: Steroid biosynthesis	0.000198252	0.000435381	2.05331e-05	0.000321247	0.000204368	0.000132514	0.000216845	0.000240083	0.000129469	0.000901295	0.00276522	0.00056773	0.00402308	0.000147203	5.11448e-05	0.000221601	0.000138648	0	4.41357e-05	0.00555467	0.000115271	0.00120429	0.000237712	0.00173678	0.000639159	0.000891741	0.00089566	0.000898822	0.000278898	0.000798105	0.000192086	8.50855e-05	5.69127e-05	0.000735641	7.19116e-06	3.38051e-05	4.04576e-06	0.000203512	6.84173e-05	0.000503943	0.000288227	0.00198684	0.000368583	0.00215891	0.00297377	0.000106477	9.67668e-05	0.00398522
ko04111	ko04111: Cell cycle - yeast	5.15944e-05	0.000155028	1.54857e-06	7.47104e-05	7.76135e-05	3.78306e-05	5.50143e-05	0.000109485	2.98927e-05	0.000296969	0.00063349	0.00017947	0.00104702	3.62024e-05	1.90082e-05	4.0452e-05	7.73257e-05	1.47451e-07	1.61463e-05	0.00144607	2.54456e-05	0.000339962	5.35348e-05	0.000532776	0.000182224	0.000106472	0.000357029	0.000248056	0.000111823	0.000206945	7.08566e-05	3.10249e-05	6.39655e-06	0.000206543	1.41375e-06	1.80346e-05	6.81011e-06	2.3897e-05	1.27224e-05	8.71795e-05	9.51818e-05	0.000427795	8.13177e-05	0.000618797	0.000606202	2.30005e-05	5.26962e-05	0.00104129
ko00312	ko00312: beta-Lactam resistance	0	0	0.00030828	0.000133965	0.000379676	0.00253476	0.00428257	0.00117225	0.000544074	0.000524767	0.000574434	9.30733e-05	0.000608198	0.000199304	0.00049741	0.000773436	0.00121511	0	0.00107784	0.000112592	0.00129255	0.000233035	0.00654659	0.00109347	0.00180076	0.00205031	0.0161528	0.00732627	0.00249839	0.00215849	0.00287169	0.00247855	0.00245694	0.00046245	0.000998067	0.000488968	0.00101125	0.00272238	0.000178852	0.00228844	0.00462147	0.000306048	0.00232648	0.000393688	0.00074932	0.000403668	0.00137471	0.00366371
ko04966	ko04966: Collecting duct acid secretion	0	0	5.68327e-05	0	0.000858251	0	0	0	0	4.49824e-06	3.17539e-05	3.72965e-06	2.54797e-05	9.10773e-07	1.85797e-06	1.31027e-05	1.81775e-05	0	0	3.72539e-05	4.24042e-07	8.47202e-06	0	1.16658e-05	6.80219e-06	3.43395e-05	0	0	0	0.00134382	1.30272e-05	0	0	0.00123796	0	3.11834e-06	0	0	0	0	0	1.61058e-05	0	8.3225e-06	0	0	2.77366e-06	1.74185e-05
ko00364	ko00364: Fluorobenzoate degradation	0	0	0	0	0	0	0	0	3.23439e-05	0	0	3.97405e-05	0	0.000296553	0	0	0	0	0.000172223	0	0.000118167	6.79159e-05	0	0	0	0	0	2.43238e-05	0	0	0	0	0	0	0.000128499	0	0	0	0	0	0	0	0.000338935	0	0.000195204	0	0.00080639	0
ko04975	ko04975: Fat digestion and absorption	0	0	0	0	0	0	0	0	0	0	0	0	0	0	0	0	0	0	0	0	3.5836e-07	0	0	0	0	0	0	0	0	0	0	0	0	0	0	0	0	0	0	0	0	0	0	0	0	0	0	0
ko00901	ko00901: Indole alkaloid biosynthesis	0	0	0	0	0	0	0	0	0	0	0	0	0	0	0	0	0	0	0	0	0	1.6443e-05	0	1.75839e-05	0	0	0	0	0	0	0	0	0	0	0	0	0	0	0	0	0	0	0	0	0	0	0	0
ko04150	ko04150: mTOR signaling pathway	5.9041e-06	0.000168784	1.76222e-05	0	0.000145695	6.64383e-05	0.000131528	0.000182098	5.47373e-05	0.000468281	0.00124677	0.000401006	0.00269565	9.1057e-05	4.6328e-05	0.000102847	0.000431592	0	6.1656e-05	0.00353735	4.63435e-05	0.00083749	0.000296743	0.00121884	0.000352564	0.000179191	0.000500517	0.000744954	0	0.000445173	0.000121257	2.77385e-05	0	0.000499473	2.48398e-05	3.01744e-05	0	0	0	0.000216203	9.17277e-05	0.00107181	0	0.00148244	0.00168701	0.000113485	0.000121727	0.00267102
ko00904	ko00904: Diterpenoid biosynthesis	0	0	0	0	6.57431e-06	0	0	0	9.07944e-06	0	0	6.45268e-06	2.17519e-05	5.30322e-07	0	0	0	0	0	2.01677e-05	1.74339e-06	6.60816e-06	0	5.17628e-06	5.97778e-06	0	0	0	0	6.56558e-06	1.03111e-06	3.62634e-06	0	4.70053e-06	0	3.89466e-06	0	0	0	0	0	0	0	2.22557e-05	3.22995e-05	0	0	5.12726e-05
ko04964	ko04964: Proximal tubule bicarbonate reclamation	0	0.000190115	3.72718e-05	0	6.88646e-05	0	0	0.000467654	1.28865e-05	0	0.000749755	0.00014886	0.00126164	0	0.000113496	3.04398e-05	0.000351632	0	1.00223e-06	0.00134255	3.89572e-05	0.000394493	0.000151542	0.000499375	0.000326677	0	7.88465e-05	0.000186388	0.000299395	0.000296508	6.75863e-05	0	0	0.000197661	0	9.54127e-06	0	1.98224e-05	0	0	0.000101932	0.000870787	2.47537e-05	0.00073035	0.00043787	9.20991e-06	0.000228492	0.000878978
ko05220	ko05220: Chronic myeloid leukemia	0	0	0	0	0	0	0	0	0	0	0	0	0	0	0	0	0	0	0	0	0	0	0	0	0	0	0	0	0	0	0	0	0	0	0	0	0	0	0	0	0	0	0	0	0	0	0	0
ko05410	ko05410: Hypertrophic cardiomyopathy (HCM)	0	1.3393e-05	4.40857e-06	0	6.64787e-07	0	0	9.0708e-07	3.144e-06	0	0	0	0	3.89416e-06	5.788e-07	0	2.66632e-05	1.84085e-05	5.69716e-06	0	5.62011e-07	2.88154e-08	1.62289e-06	0	0	0	0	0	0	1.43213e-06	6.63174e-07	0	0	1.29543e-06	1.55048e-06	1.50001e-07	0	1.6878e-06	6.03589e-06	0	9.13384e-07	1.17361e-05	0	0	0	5.75202e-06	0	4.90555e-07
ko05330	ko05330: Allograft rejection	0	0	0	0	0	0	0	0	0	0	0	0	0	0	0	0	0	0	0	0	0	0	0	0	0	0	0	0	0	0	0	0	0	0	0	0	0	0	0	0	0	0	0	0	0	0	0	0
ko04972	ko04972: Pancreatic secretion	0	0	7.56215e-07	8.91549e-05	6.34742e-06	0	0	0	2.88447e-06	2.10459e-05	1.76681e-05	2.01571e-05	7.2766e-05	0	0	0	2.14003e-05	0	0	5.01719e-05	2.74742e-06	3.64045e-05	8.91303e-05	2.00724e-05	7.90287e-06	0	1.22019e-05	1.08335e-05	8.70031e-06	2.40403e-05	2.36593e-06	0	0	2.9237e-05	0	1.08506e-05	0	8.14775e-06	0	0	0	4.53683e-05	3.74507e-07	7.32534e-05	0.000184063	8.69974e-06	0	0.000155704
ko00062	ko00062: Fatty acid elongation in mitochondria	0	0.000189278	3.46464e-05	0	0	2.90592e-05	0	0.000137205	6.95975e-05	0	0.000177718	9.2375e-05	0.000521925	0	8.43919e-05	8.5856e-05	0.000415852	0	5.61972e-05	0.00302598	2.72174e-05	0.000200883	0.000348302	0.000318	5.43929e-05	0	0	0.000111998	0	0.000124977	7.44379e-05	0	0	5.90832e-05	6.73798e-05	4.22934e-05	0	0.000347897	0	0	6.23504e-05	0.000132057	0	0.000435566	0.000146327	8.94273e-05	0	0.000492693
ko05131	ko05131: Shigellosis	0	0	0	0	0	0	0	1.89967e-06	0	0	0	0	1.8222e-09	8.82947e-09	0	0	0	0	0	0	2.10719e-08	1.14326e-07	0	0	0	0	0	0	0	0	0	0	0	0	0	0	0	0	0	0	0	0	0	0	0	0	0	0
ko00902	ko00902: Monoterpenoid biosynthesis	0	0	0	0	0	0	0	0	0	0	0	0	0	1.13666e-05	0	0	0	0	0	0	0	0	0	0	0	0	0	0	0	0	0	0	0	0	0	0	0	0	0	0	0	0	0	0	0	0	0	0
ko00982	ko00982: Drug metabolism - cytochrome P450	0	0	0	0	0	0	0	0	0	0	0	0	0	0	0	0	0	0	0	0	3.46685e-07	0	0	1.04551e-05	0	0	0	0	0	0	0	9.26444e-08	0	0	0	0	0	0	0	0	0	0	0	0	0	0	0	0
ko00905	ko00905: Brassinosteroid biosynthesis	0	0	0	0	0	0	0	0	0	0	1.25869e-05	5.07711e-07	7.86348e-06	0	0	0	0	0	0	3.43391e-06	0	2.4297e-06	0	0	1.81072e-06	0	0	3.02935e-06	0	0	3.30685e-05	0	0	2.48787e-06	0	0	0	0	0	0	0	3.1935e-06	0	0	8.96371e-07	0	0	0
ko00232	ko00232: Caffeine metabolism	0	0	0	0	0	0	0	0	0	0	0	0	0	0	0	0	0	0	0	0	3.00151e-06	0	0	0	0	0	0	0	0	0	0	0	0	0	0	0	0	0	0	0	0	0	0	0	2.49122e-06	0	0	0
ko00622	ko00622: Xylene degradation	0	0	1.15956e-05	0	2.38683e-06	4.58006e-06	1.79938e-06	3.68376e-06	0.000261779	0	7.03638e-06	0.000176507	6.89065e-06	1.36679e-07	7.67092e-10	0.000335057	0.000477915	0	0.00159177	7.56009e-06	2.38812e-06	0.000465088	0	2.17862e-06	0.000546879	6.34812e-07	0	3.96658e-07	0	2.33923e-06	1.47266e-05	8.22389e-07	0	0.00106421	1.38723e-06	2.20096e-06	0	0	0	0.0017372	5.76227e-06	0.000803006	3.68532e-06	1.63651e-07	1.00332e-05	0.000273713	0.000659328	0
ko04730	ko04730: Long-term depression	0	0	3.11851e-06	0	0	0	0	0	1.29081e-07	3.15513e-06	0	0	1.69438e-06	0	0	1.11229e-05	0	0	0	0	0	2.20858e-06	0	4.44372e-06	0	0	0	0	0	2.35206e-07	0	0	0	0	4.02715e-07	0	0	0	0	0	0	7.17772e-07	0	1.55782e-06	4.58831e-07	0	0	0
ko00966	ko00966: Glucosinolate biosynthesis	0	0	7.21376e-07	0	0	0	0	0	0	0	0	3.55196e-06	2.78063e-05	0	0	0	0	0	0	6.83126e-05	4.4481e-07	2.37051e-05	0	0	0	0	0	3.10999e-05	0	8.42116e-06	0	0	0	0	0	0	0	0	0	0	0	0	0	0	8.29522e-07	0	0	0
ko00591	ko00591: Linoleic acid metabolism	0	0	7.49815e-06	2.18919e-06	1.25391e-05	0	0	7.6371e-05	4.68348e-06	0	9.9696e-06	1.54748e-05	6.93251e-05	5.39805e-05	2.30625e-05	7.38149e-05	6.00873e-05	0	3.57802e-05	4.89058e-06	1.62545e-05	1.01794e-05	0.000170849	3.68474e-06	1.00788e-06	0	0	3.65727e-05	0	5.38067e-07	0	7.62961e-06	0	0	0	0	0	0	0	0	0	0	0.00031338	8.03534e-05	3.05341e-05	0.000221646	0.000128951	5.95737e-06
ko04720	ko04720: Long-term potentiation	0	0	0	0	0	0	0	0	0	0	0	0	0	0	0	0	0	0	0	0	0	0	0	0	0	0	0	0	0	0	0	0	0	0	0	0	0	0	0	0	0	0	0	0	2.74693e-05	0	0	0
ko00196	ko00196: Photosynthesis - antenna proteins	0	0	0	0	1.49906e-05	1.28693e-05	6.95867e-06	0	0	0	0	1.1662e-07	7.03055e-06	0	0	1.09047e-06	1.23687e-07	0	8.52654e-11	0	2.81992e-08	6.62273e-07	7.83562e-10	0	6.54494e-06	0	0	0	0	0	0	0	0	5.25535e-06	0	0	0	0	0	0	0	0	0	2.65887e-06	0	2.53351e-05	0	0
ko00944	ko00944: Flavone and flavonol biosynthesis	0	0	0	0	0	0	0	9.56211e-05	0	0	0	0	0	0	0	0	0	0	0	0	4.26496e-06	0	0	0	1.54052e-06	0	0	0	0	0	0	0	0	0	0	0	0	0	0	0	0	0	0	0	0	0	0	0
ko04070	ko04070: Phosphatidylinositol signaling system	0	0	4.21417e-06	0	3.21123e-05	0	0	0	1.01748e-05	0	0.000191295	6.3104e-05	0.000366963	0	0	0	0	0	0	0.00401534	1.53787e-05	0.000101857	0.000125856	0.000174282	7.2184e-05	0	0	0.000145052	0	9.64575e-05	0	0	0	7.9061e-05	0	6.98694e-06	0	0	0	0	0	6.68179e-05	0	0.000321875	0.000373841	3.69881e-05	4.48586e-05	0.000423546
ko00331	ko00331: Clavulanic acid biosynthesis	0	0	0	0	0	0	0	0	0	0	0	0	0.00013919	0	0	0	0	0	0	0	0	0	0	0	0	0	0	0	0	0	0	0	0	0	0	6.36902e-05	0	0	0	0	0	0	0	0	0	0	0	0
ko00942	ko00942: Anthocyanin biosynthesis	0	0	0	0	0	0	0	0	0	0	0	0	0	0	0	0	0	0	0	0	0	0	0	0	0	0	0	2.11258e-09	0	0	0	0	0	0	0	0	0	0	0	0	0	0	0	0	0	0	0	0
ko00642	ko00642: Ethylbenzene degradation	0	0	3.42902e-06	0	0	0	0	0	2.0968e-07	0	0	1.88556e-08	0	0	0	0	0	0	0	0	6.54024e-06	6.07168e-08	0	0	0	0	0	0	0	4.36161e-08	2.56823e-07	0	0	0	0	0	0	0	0	0	0	8.85735e-07	2.47488e-07	4.17525e-08	0	0	0	0
ko00909	ko00909: Sesquiterpenoid biosynthesis	4.69426e-05	0	0	0	0	0	0	0	0	0	0	0	0	0	0	0	0	0	0	0	0	0	0	0	0	0	0	0	0	0	0	0	0	0	0	0	0	0	0	0	0	0	0	0	0	0	0	0
ko05213	ko05213: Endometrial cancer	0	0	1.18328e-06	0	0	0	0	0	0	0	0	0	0	0	0	0	0	0	0	0	0	0	0	0	0	0	0	0	0	0	0	0	0	0	0	0	0	0	0	0	1.40659e-05	0	0	0	0	0	0	0
ko05223	ko05223: Non-small cell lung cancer	0	0	0	0	0	0	0	0	0	0	0	0	0	0	0	0	0	0	0	0	0	0	0	0	0	0	0	0	0	0	0	0	0	0	0	0	0	0	0	0	0	0	0	0	0	0	0	0
ko00351	ko00351: DDT degradation	0	0	0	0	0	0	0	0	0	0	0	0	0	0	0	0	0	0	0	0	0	0	0	0	0	0	0	0	0	0	0	0	0	0	0	0	0	0	0	0	0	0	0	0	0	0	0	0
ko05217	ko05217: Basal cell carcinoma	0	0	0	0	0	0	0	0	0	0	0	0	0	0	0	0	0	0	0	0	0	0	0	0	0	0	0	0	0	0	0	0	0	0	0	0	0	0	0	0	0	0	0	0	0	0	0	0
ko05214	ko05214: Glioma	0	0	0	0	0	0	0	0	0	0	0	0	0	0	0	0	0	0	0	0	0	0	0	0	0	0	0	0	0	0	0	0	0	0	0	0	0	0	0	0	0	0	0	0	0	0	0	0
ko04977	ko04977: Vitamin digestion and absorption	0	0	0	0	0	0	0	0	0	0	0	0	0	0	0	0	0	0	0	0	0	0	0	0	0	0	0	0	0	0	0	0	0	0	0	0	0	0	0	0	0	0	0	0	0	0	0	0
[truncated: 601 more columns]
