# Supplementary material for: Metabolic Reconstruction for Metagenomic Data and Its Application to the Human Microbiome
Source: PLoS Comput Biol. 2012 Jun 13;8(6):e1002358. doi: 10.1371/journal.pcbi.1002358 (PMC3374609; doi:10.1371/journal.pcbi.1002358)
Supplement: Table S10 — Significant associations between KEGG modules and individual carbohydrate active enzyme (CAZy) gene families. Statistically significant Spearman correlations between module abundances (from HUMAnN) and CAZy abundances (independently generated from the same metagenomic data by [21]) were identified across all body sites (FDR q<0.05). Note that many metabolic functions within every body site correlate strongly with CAZy abundances, even for the many pathways that do not themselves include the correlated CAZys. (XLSX) [file pcbi.1002358.s015.xlsx]

## Sheet: cazy_clinician
Site	ID	Name	CAZy	Spearman r	N	Nominal p	Bonferroni p	Q
Anterior nares	M00317	Manganese_iron_transport_system	GH103	0.753509	87	0	0	0
Buccal mucosa	M00061	Uronic_acid_metabolism	GH26	0.700712	109	0	0	0
Buccal mucosa	M00124	Pyridoxal_biosynthesis__erythrose-4P_=__pyridoxal-5P	GH109	0.702078	109	0	0	0
Buccal mucosa	M00229	Arginine_transport_system	GH102	0.697819	109	0	0	0
Buccal mucosa	M00260	DNA_polymerase_III_complex__bacteria	PL3	0.710373	109	0	0	0
Stool	M00004	Pentose_phosphate_pathway__Pentose_phosphate_cycle_	GH88	0.769146	136	0	0	0
Stool	M00004	Pentose_phosphate_pathway__Pentose_phosphate_cycle_	GH89	0.732138	136	0	0	0
Stool	M00004	Pentose_phosphate_pathway__Pentose_phosphate_cycle_	GH92	0.728998	136	0	0	0
Stool	M00004	Pentose_phosphate_pathway__Pentose_phosphate_cycle_	GH33	0.696633	136	0	0	0
Stool	M00004	Pentose_phosphate_pathway__Pentose_phosphate_cycle_	GH15	0.691254	136	0	0	0
Stool	M00004	Pentose_phosphate_pathway__Pentose_phosphate_cycle_	PL8	0.688782	136	0	0	0
Stool	M00004	Pentose_phosphate_pathway__Pentose_phosphate_cycle_	GH105	0.687224	136	0	0	0
Stool	M00004	Pentose_phosphate_pathway__Pentose_phosphate_cycle_	GH106	0.685572	136	0	0	0
Stool	M00004	Pentose_phosphate_pathway__Pentose_phosphate_cycle_	PL10	0.682028	136	0	0	0
Stool	M00004	Pentose_phosphate_pathway__Pentose_phosphate_cycle_	GH109	0.678103	136	0	0	0
Stool	M00004	Pentose_phosphate_pathway__Pentose_phosphate_cycle_	PL11	0.674329	136	0	0	0
Stool	M00004	Pentose_phosphate_pathway__Pentose_phosphate_cycle_	GH29	0.667806	136	0	0	0
Stool	M00004	Pentose_phosphate_pathway__Pentose_phosphate_cycle_	PL15	0.657272	136	0	0	0
Stool	M00004	Pentose_phosphate_pathway__Pentose_phosphate_cycle_	PL13	0.657126	136	0	0	0
Stool	M00004	Pentose_phosphate_pathway__Pentose_phosphate_cycle_	GH2	0.655773	136	0	0	0
Stool	M00004	Pentose_phosphate_pathway__Pentose_phosphate_cycle_	GH35	0.642269	136	0	0	0
Stool	M00004	Pentose_phosphate_pathway__Pentose_phosphate_cycle_	GH112	-0.691952	136	0	0	0
Stool	M00004	Pentose_phosphate_pathway__Pentose_phosphate_cycle_	GH4	-0.703533	136	0	0	0
Stool	M00004	Pentose_phosphate_pathway__Pentose_phosphate_cycle_	GH1	-0.738678	136	0	0	0
Stool	M00004	Pentose_phosphate_pathway__Pentose_phosphate_cycle_	GH94	-0.749347	136	0	0	0
Stool	M00006	Pentose_phosphate_pathway__oxidative_phase__glucose_6P_=__ribulose_5P	GH20	0.758779	136	0	0	0
Stool	M00006	Pentose_phosphate_pathway__oxidative_phase__glucose_6P_=__ribulose_5P	GH92	0.74562	136	0	0	0
Stool	M00006	Pentose_phosphate_pathway__oxidative_phase__glucose_6P_=__ribulose_5P	GH33	0.72768	136	0	0	0
Stool	M00006	Pentose_phosphate_pathway__oxidative_phase__glucose_6P_=__ribulose_5P	GH15	0.707372	136	0	0	0
Stool	M00006	Pentose_phosphate_pathway__oxidative_phase__glucose_6P_=__ribulose_5P	PL11	0.700168	136	0	0	0
Stool	M00006	Pentose_phosphate_pathway__oxidative_phase__glucose_6P_=__ribulose_5P	PL15	0.686002	136	0	0	0
Stool	M00006	Pentose_phosphate_pathway__oxidative_phase__glucose_6P_=__ribulose_5P	GH78	0.685205	136	0	0	0
Stool	M00006	Pentose_phosphate_pathway__oxidative_phase__glucose_6P_=__ribulose_5P	GH29	0.683049	136	0	0	0
Stool	M00006	Pentose_phosphate_pathway__oxidative_phase__glucose_6P_=__ribulose_5P	PL10	0.681119	136	0	0	0
Stool	M00006	Pentose_phosphate_pathway__oxidative_phase__glucose_6P_=__ribulose_5P	GH109	0.67935	136	0	0	0
Stool	M00006	Pentose_phosphate_pathway__oxidative_phase__glucose_6P_=__ribulose_5P	PL13	0.677943	136	0	0	0
Stool	M00006	Pentose_phosphate_pathway__oxidative_phase__glucose_6P_=__ribulose_5P	GH2	0.66723	136	0	0	0
Stool	M00006	Pentose_phosphate_pathway__oxidative_phase__glucose_6P_=__ribulose_5P	PL12	0.663922	136	0	0	0
Stool	M00006	Pentose_phosphate_pathway__oxidative_phase__glucose_6P_=__ribulose_5P	GH18	0.660869	136	0	0	0
Stool	M00006	Pentose_phosphate_pathway__oxidative_phase__glucose_6P_=__ribulose_5P	GH97	0.639543	136	0	0	0
Stool	M00006	Pentose_phosphate_pathway__oxidative_phase__glucose_6P_=__ribulose_5P	GH112	-0.707982	136	0	0	0
Stool	M00006	Pentose_phosphate_pathway__oxidative_phase__glucose_6P_=__ribulose_5P	GH4	-0.710035	136	0	0	0
Stool	M00006	Pentose_phosphate_pathway__oxidative_phase__glucose_6P_=__ribulose_5P	GH1	-0.748969	136	0	0	0
Stool	M00008	Entner-Doudoroff_pathway__glucose-6P_=__glyceraldehyde-3P___pyruvate	GH89	0.75855	136	0	0	0
Stool	M00008	Entner-Doudoroff_pathway__glucose-6P_=__glyceraldehyde-3P___pyruvate	GH88	0.757509	136	0	0	0
Stool	M00008	Entner-Doudoroff_pathway__glucose-6P_=__glyceraldehyde-3P___pyruvate	GH33	0.750738	136	0	0	0
Stool	M00008	Entner-Doudoroff_pathway__glucose-6P_=__glyceraldehyde-3P___pyruvate	GH20	0.738684	136	0	0	0
Stool	M00008	Entner-Doudoroff_pathway__glucose-6P_=__glyceraldehyde-3P___pyruvate	GH92	0.720249	136	0	0	0
Stool	M00008	Entner-Doudoroff_pathway__glucose-6P_=__glyceraldehyde-3P___pyruvate	GH15	0.715259	136	0	0	0
Stool	M00008	Entner-Doudoroff_pathway__glucose-6P_=__glyceraldehyde-3P___pyruvate	GH105	0.696276	136	0	0	0
Stool	M00008	Entner-Doudoroff_pathway__glucose-6P_=__glyceraldehyde-3P___pyruvate	GH29	0.689838	136	0	0	0
Stool	M00008	Entner-Doudoroff_pathway__glucose-6P_=__glyceraldehyde-3P___pyruvate	GH35	0.688856	136	0	0	0
Stool	M00008	Entner-Doudoroff_pathway__glucose-6P_=__glyceraldehyde-3P___pyruvate	GH106	0.664653	136	0	0	0
Stool	M00008	Entner-Doudoroff_pathway__glucose-6P_=__glyceraldehyde-3P___pyruvate	PL11	0.662498	136	0	0	0
Stool	M00008	Entner-Doudoroff_pathway__glucose-6P_=__glyceraldehyde-3P___pyruvate	GH78	0.661906	136	0	0	0
Stool	M00008	Entner-Doudoroff_pathway__glucose-6P_=__glyceraldehyde-3P___pyruvate	GH109	0.661534	136	0	0	0
Stool	M00008	Entner-Doudoroff_pathway__glucose-6P_=__glyceraldehyde-3P___pyruvate	GH2	0.661138	136	0	0	0
Stool	M00008	Entner-Doudoroff_pathway__glucose-6P_=__glyceraldehyde-3P___pyruvate	PL15	0.646513	136	0	0	0
Stool	M00008	Entner-Doudoroff_pathway__glucose-6P_=__glyceraldehyde-3P___pyruvate	GH18	0.643672	136	0	0	0
Stool	M00008	Entner-Doudoroff_pathway__glucose-6P_=__glyceraldehyde-3P___pyruvate	GH4	-0.654526	136	0	0	0
Stool	M00008	Entner-Doudoroff_pathway__glucose-6P_=__glyceraldehyde-3P___pyruvate	GH1	-0.671785	136	0	0	0
Stool	M00008	Entner-Doudoroff_pathway__glucose-6P_=__glyceraldehyde-3P___pyruvate	GH94	-0.699665	136	0	0	0
Stool	M00015	Proline_biosynthesis__glutamate_=__proline	PL1	0.713073	136	0	0	0
Stool	M00015	Proline_biosynthesis__glutamate_=__proline	GH43	0.702569	136	0	0	0
Stool	M00015	Proline_biosynthesis__glutamate_=__proline	GH89	0.678343	136	0	0	0
Stool	M00015	Proline_biosynthesis__glutamate_=__proline	PL11	0.675967	136	0	0	0
Stool	M00015	Proline_biosynthesis__glutamate_=__proline	GH95	0.66692	136	0	0	0
Stool	M00015	Proline_biosynthesis__glutamate_=__proline	GH105	0.658793	136	0	0	0
Stool	M00015	Proline_biosynthesis__glutamate_=__proline	GH115	0.658014	136	0	0	0
Stool	M00015	Proline_biosynthesis__glutamate_=__proline	GH106	0.655995	136	0	0	0
Stool	M00015	Proline_biosynthesis__glutamate_=__proline	GH92	0.646872	136	0	0	0
Stool	M00015	Proline_biosynthesis__glutamate_=__proline	GH31	0.644215	136	0	0	0
Stool	M00015	Proline_biosynthesis__glutamate_=__proline	GH67	0.641416	136	0	0	0
Stool	M00015	Proline_biosynthesis__glutamate_=__proline	GH10	0.641273	136	0	0	0
Stool	M00015	Proline_biosynthesis__glutamate_=__proline	GH78	0.641139	136	0	0	0
Stool	M00015	Proline_biosynthesis__glutamate_=__proline	GH112	-0.644713	136	0	0	0
Stool	M00015	Proline_biosynthesis__glutamate_=__proline	GH1	-0.665578	136	0	0	0
Stool	M00016	Lysine_biosynthesis__aspartate_=__lysine	GH112	0.642389	136	0	0	0
Stool	M00017	Methionine_biosynthesis__apartate_=__homoserine_=__methionine	GH1	0.770379	136	0	0	0
Stool	M00017	Methionine_biosynthesis__apartate_=__homoserine_=__methionine	GH112	0.747106	136	0	0	0
Stool	M00017	Methionine_biosynthesis__apartate_=__homoserine_=__methionine	GH94	0.668399	136	0	0	0
Stool	M00018	Threonine_biosynthesis__apartate_=__homoserine_=__threonine	GH1	0.755369	136	0	0	0
Stool	M00018	Threonine_biosynthesis__apartate_=__homoserine_=__threonine	GH112	0.755307	136	0	0	0
Stool	M00018	Threonine_biosynthesis__apartate_=__homoserine_=__threonine	GH94	0.750275	136	0	0	0
Stool	M00018	Threonine_biosynthesis__apartate_=__homoserine_=__threonine	GH113	0.701578	136	0	0	0
Stool	M00018	Threonine_biosynthesis__apartate_=__homoserine_=__threonine	GH4	0.692398	136	0	0	0
Stool	M00018	Threonine_biosynthesis__apartate_=__homoserine_=__threonine	GH59	0.652346	136	0	0	0
Stool	M00018	Threonine_biosynthesis__apartate_=__homoserine_=__threonine	GH105	-0.647832	136	0	0	0
Stool	M00018	Threonine_biosynthesis__apartate_=__homoserine_=__threonine	GH35	-0.649939	136	0	0	0
Stool	M00018	Threonine_biosynthesis__apartate_=__homoserine_=__threonine	PL8	-0.653012	136	0	0	0
Stool	M00018	Threonine_biosynthesis__apartate_=__homoserine_=__threonine	GH95	-0.654854	136	0	0	0
Stool	M00018	Threonine_biosynthesis__apartate_=__homoserine_=__threonine	GH33	-0.656888	136	0	0	0
Stool	M00018	Threonine_biosynthesis__apartate_=__homoserine_=__threonine	GH20	-0.661576	136	0	0	0
Stool	M00018	Threonine_biosynthesis__apartate_=__homoserine_=__threonine	GH89	-0.676834	136	0	0	0
Stool	M00018	Threonine_biosynthesis__apartate_=__homoserine_=__threonine	GH92	-0.677942	136	0	0	0
Stool	M00018	Threonine_biosynthesis__apartate_=__homoserine_=__threonine	GH88	-0.695003	136	0	0	0
Stool	M00019	Leucine_biosynthesis__pyruvate_=__2-oxoisovalerate_=__leucine	GH4	-0.670434	136	0	0	0
Stool	M00019	Leucine_biosynthesis__pyruvate_=__2-oxoisovalerate_=__leucine	GH1	-0.671552	136	0	0	0
Stool	M00022	Shikimate_pathway__phosphoenolpyruvate___erythrose-4P_=__chorismate	GH1	0.806888	136	0	0	0
Stool	M00022	Shikimate_pathway__phosphoenolpyruvate___erythrose-4P_=__chorismate	GH112	0.768172	136	0	0	0
Stool	M00022	Shikimate_pathway__phosphoenolpyruvate___erythrose-4P_=__chorismate	GH94	0.703318	136	0	0	0
Stool	M00022	Shikimate_pathway__phosphoenolpyruvate___erythrose-4P_=__chorismate	GH2	-0.639993	136	0	0	0
Stool	M00022	Shikimate_pathway__phosphoenolpyruvate___erythrose-4P_=__chorismate	GH28	-0.644609	136	0	0	0
Stool	M00022	Shikimate_pathway__phosphoenolpyruvate___erythrose-4P_=__chorismate	GH105	-0.648832	136	0	0	0
Stool	M00022	Shikimate_pathway__phosphoenolpyruvate___erythrose-4P_=__chorismate	GH43	-0.6512	136	0	0	0
Stool	M00022	Shikimate_pathway__phosphoenolpyruvate___erythrose-4P_=__chorismate	GH97	-0.654384	136	0	0	0
Stool	M00022	Shikimate_pathway__phosphoenolpyruvate___erythrose-4P_=__chorismate	GH106	-0.654405	136	0	0	0
Stool	M00022	Shikimate_pathway__phosphoenolpyruvate___erythrose-4P_=__chorismate	GH95	-0.654886	136	0	0	0
Stool	M00022	Shikimate_pathway__phosphoenolpyruvate___erythrose-4P_=__chorismate	PL8	-0.659359	136	0	0	0
Stool	M00022	Shikimate_pathway__phosphoenolpyruvate___erythrose-4P_=__chorismate	GH20	-0.668953	136	0	0	0
Stool	M00022	Shikimate_pathway__phosphoenolpyruvate___erythrose-4P_=__chorismate	GH92	-0.697376	136	0	0	0
Stool	M00022	Shikimate_pathway__phosphoenolpyruvate___erythrose-4P_=__chorismate	GH88	-0.717466	136	0	0	0
Stool	M00026	Histidine_biosynthesis__PRPP_=__histidine	GH112	0.811966	136	0	0	0
Stool	M00026	Histidine_biosynthesis__PRPP_=__histidine	GH1	0.789162	136	0	0	0
Stool	M00026	Histidine_biosynthesis__PRPP_=__histidine	GH94	0.774285	136	0	0	0
Stool	M00026	Histidine_biosynthesis__PRPP_=__histidine	GH4	0.690807	136	0	0	0
Stool	M00026	Histidine_biosynthesis__PRPP_=__histidine	GH113	0.68596	136	0	0	0
Stool	M00026	Histidine_biosynthesis__PRPP_=__histidine	GH88	-0.640449	136	0	0	0
Stool	M00028	Ornithine_biosynthesis__glutamate_=__ornithine	GH1	0.644097	136	0	0	0
Stool	M00045	Histidine_degradation__histidine_=__N-formiminoglutamate_=__glutamate	GH92	0.735523	136	0	0	0
Stool	M00045	Histidine_degradation__histidine_=__N-formiminoglutamate_=__glutamate	GH88	0.732054	136	0	0	0
Stool	M00045	Histidine_degradation__histidine_=__N-formiminoglutamate_=__glutamate	GH89	0.697256	136	0	0	0
Stool	M00045	Histidine_degradation__histidine_=__N-formiminoglutamate_=__glutamate	PL15	0.689967	136	0	0	0
Stool	M00045	Histidine_degradation__histidine_=__N-formiminoglutamate_=__glutamate	GH78	0.688306	136	0	0	0
Stool	M00045	Histidine_degradation__histidine_=__N-formiminoglutamate_=__glutamate	GH20	0.687556	136	0	0	0
Stool	M00045	Histidine_degradation__histidine_=__N-formiminoglutamate_=__glutamate	GH18	0.687337	136	0	0	0
Stool	M00045	Histidine_degradation__histidine_=__N-formiminoglutamate_=__glutamate	PL11	0.686182	136	0	0	0
Stool	M00045	Histidine_degradation__histidine_=__N-formiminoglutamate_=__glutamate	PL13	0.679429	136	0	0	0
Stool	M00045	Histidine_degradation__histidine_=__N-formiminoglutamate_=__glutamate	GH50	0.67437	136	0	0	0
Stool	M00045	Histidine_degradation__histidine_=__N-formiminoglutamate_=__glutamate	PL12	0.663056	136	0	0	0
Stool	M00045	Histidine_degradation__histidine_=__N-formiminoglutamate_=__glutamate	PL8	0.658879	136	0	0	0
Stool	M00045	Histidine_degradation__histidine_=__N-formiminoglutamate_=__glutamate	GH106	0.645069	136	0	0	0
Stool	M00045	Histidine_degradation__histidine_=__N-formiminoglutamate_=__glutamate	GH105	0.642434	136	0	0	0
Stool	M00045	Histidine_degradation__histidine_=__N-formiminoglutamate_=__glutamate	GH112	-0.674435	136	0	0	0
Stool	M00045	Histidine_degradation__histidine_=__N-formiminoglutamate_=__glutamate	GH4	-0.699465	136	0	0	0
Stool	M00045	Histidine_degradation__histidine_=__N-formiminoglutamate_=__glutamate	GH1	-0.727437	136	0	0	0
Stool	M00045	Histidine_degradation__histidine_=__N-formiminoglutamate_=__glutamate	GH94	-0.743539	136	0	0	0
Stool	M00052	Pyrimidine_ribonucleotide_biosynthesis__UMP_=__UDP_UTP_CDP_CTP	GH92	0.684476	136	0	0	0
Stool	M00052	Pyrimidine_ribonucleotide_biosynthesis__UMP_=__UDP_UTP_CDP_CTP	GH89	0.661084	136	0	0	0
Stool	M00052	Pyrimidine_ribonucleotide_biosynthesis__UMP_=__UDP_UTP_CDP_CTP	GH33	0.639996	136	0	0	0
Stool	M00052	Pyrimidine_ribonucleotide_biosynthesis__UMP_=__UDP_UTP_CDP_CTP	GH94	-0.704816	136	0	0	0
Stool	M00060	Lipopolysaccharide_biosynthesis__KDO2-lipid_A	GH95	0.70162	136	0	0	0
Stool	M00060	Lipopolysaccharide_biosynthesis__KDO2-lipid_A	GH43	0.698622	136	0	0	0
Stool	M00060	Lipopolysaccharide_biosynthesis__KDO2-lipid_A	GH97	0.697948	136	0	0	0
Stool	M00060	Lipopolysaccharide_biosynthesis__KDO2-lipid_A	GH28	0.685346	136	0	0	0
Stool	M00060	Lipopolysaccharide_biosynthesis__KDO2-lipid_A	GH106	0.668705	136	0	0	0
Stool	M00060	Lipopolysaccharide_biosynthesis__KDO2-lipid_A	PL1	0.663094	136	0	0	0
Stool	M00060	Lipopolysaccharide_biosynthesis__KDO2-lipid_A	GH33	0.660305	136	0	0	0
Stool	M00060	Lipopolysaccharide_biosynthesis__KDO2-lipid_A	GH105	0.655408	136	0	0	0
Stool	M00060	Lipopolysaccharide_biosynthesis__KDO2-lipid_A	GH92	0.650739	136	0	0	0
Stool	M00060	Lipopolysaccharide_biosynthesis__KDO2-lipid_A	GH2	0.650507	136	0	0	0
Stool	M00060	Lipopolysaccharide_biosynthesis__KDO2-lipid_A	GH4	-0.726887	136	0	0	0
Stool	M00061	Uronic_acid_metabolism	GH43	0.675988	136	0	0	0
Stool	M00061	Uronic_acid_metabolism	PL1	0.667804	136	0	0	0
Stool	M00061	Uronic_acid_metabolism	GH28	0.657773	136	0	0	0
Stool	M00061	Uronic_acid_metabolism	GH67	0.642465	136	0	0	0
Stool	M00061	Uronic_acid_metabolism	GH95	0.640306	136	0	0	0
Stool	M00076	Dermatan_sulfate_degradation	GH89	0.664392	136	0	0	0
Stool	M00076	Dermatan_sulfate_degradation	GH94	-0.664294	136	0	0	0
Stool	M00077	Chondroitin_sulfate_degradation	GH89	0.706884	136	0	0	0
Stool	M00077	Chondroitin_sulfate_degradation	GH33	0.699015	136	0	0	0
Stool	M00077	Chondroitin_sulfate_degradation	GH105	0.683054	136	0	0	0
Stool	M00077	Chondroitin_sulfate_degradation	GH92	0.680444	136	0	0	0
Stool	M00077	Chondroitin_sulfate_degradation	GH106	0.670214	136	0	0	0
Stool	M00077	Chondroitin_sulfate_degradation	GH95	0.669654	136	0	0	0
Stool	M00077	Chondroitin_sulfate_degradation	GH78	0.665556	136	0	0	0
Stool	M00077	Chondroitin_sulfate_degradation	GH16	0.65932	136	0	0	0
Stool	M00077	Chondroitin_sulfate_degradation	GH20	0.65055	136	0	0	0
Stool	M00077	Chondroitin_sulfate_degradation	PL11	0.6494	136	0	0	0
Stool	M00077	Chondroitin_sulfate_degradation	GH115	0.646624	136	0	0	0
Stool	M00077	Chondroitin_sulfate_degradation	GH35	0.644113	136	0	0	0
Stool	M00077	Chondroitin_sulfate_degradation	GH88	0.639519	136	0	0	0
Stool	M00077	Chondroitin_sulfate_degradation	GH4	-0.677644	136	0	0	0
Stool	M00077	Chondroitin_sulfate_degradation	GH112	-0.697643	136	0	0	0
Stool	M00077	Chondroitin_sulfate_degradation	GH1	-0.707435	136	0	0	0
Stool	M00077	Chondroitin_sulfate_degradation	GH94	-0.708078	136	0	0	0
Stool	M00079	Keratan_sulfate_degradation	GH33	0.693694	136	0	0	0
Stool	M00079	Keratan_sulfate_degradation	GH92	0.6885	136	0	0	0
Stool	M00079	Keratan_sulfate_degradation	GH35	0.674908	136	0	0	0
Stool	M00079	Keratan_sulfate_degradation	GH105	0.674733	136	0	0	0
Stool	M00079	Keratan_sulfate_degradation	GH95	0.665237	136	0	0	0
Stool	M00079	Keratan_sulfate_degradation	GH78	0.66293	136	0	0	0
Stool	M00079	Keratan_sulfate_degradation	GH88	0.660506	136	0	0	0
Stool	M00079	Keratan_sulfate_degradation	GH106	0.659584	136	0	0	0
Stool	M00079	Keratan_sulfate_degradation	GH20	0.650555	136	0	0	0
Stool	M00079	Keratan_sulfate_degradation	PL1	0.649115	136	0	0	0
Stool	M00079	Keratan_sulfate_degradation	GH112	-0.698579	136	0	0	0
Stool	M00079	Keratan_sulfate_degradation	GH94	-0.715173	136	0	0	0
Stool	M00079	Keratan_sulfate_degradation	GH1	-0.732129	136	0	0	0
Stool	M00083	Fatty_acid_biosynthesis__elongation	GH112	-0.677034	136	0	0	0
Stool	M00083	Fatty_acid_biosynthesis__elongation	GH4	-0.68669	136	0	0	0
Stool	M00087	beta-Oxidation	GH112	0.785856	136	0	0	0
Stool	M00087	beta-Oxidation	GH4	0.764978	136	0	0	0
Stool	M00087	beta-Oxidation	GH1	0.755819	136	0	0	0
Stool	M00087	beta-Oxidation	GH92	-0.645359	136	0	0	0
Stool	M00087	beta-Oxidation	GH105	-0.646229	136	0	0	0
Stool	M00087	beta-Oxidation	GH106	-0.653376	136	0	0	0
Stool	M00087	beta-Oxidation	GH43	-0.656347	136	0	0	0
Stool	M00087	beta-Oxidation	GH97	-0.659208	136	0	0	0
Stool	M00087	beta-Oxidation	GH28	-0.65992	136	0	0	0
Stool	M00087	beta-Oxidation	GH95	-0.662663	136	0	0	0
Stool	M00098	Acylglycerol_degradation	GH1	0.823566	136	0	0	0
Stool	M00098	Acylglycerol_degradation	GH4	0.81489	136	0	0	0
Stool	M00098	Acylglycerol_degradation	GH112	0.797722	136	0	0	0
Stool	M00098	Acylglycerol_degradation	GH94	0.660973	136	0	0	0
Stool	M00098	Acylglycerol_degradation	GH31	-0.639756	136	0	0	0
Stool	M00098	Acylglycerol_degradation	PL8	-0.640427	136	0	0	0
Stool	M00098	Acylglycerol_degradation	GH29	-0.640836	136	0	0	0
Stool	M00098	Acylglycerol_degradation	GH16	-0.649514	136	0	0	0
Stool	M00098	Acylglycerol_degradation	PL10	-0.654662	136	0	0	0
Stool	M00098	Acylglycerol_degradation	GH35	-0.671552	136	0	0	0
Stool	M00098	Acylglycerol_degradation	GH78	-0.695038	136	0	0	0
Stool	M00098	Acylglycerol_degradation	PL1	-0.710515	136	0	0	0
Stool	M00098	Acylglycerol_degradation	GH89	-0.717546	136	0	0	0
Stool	M00098	Acylglycerol_degradation	GH20	-0.718197	136	0	0	0
Stool	M00098	Acylglycerol_degradation	GH2	-0.724146	136	0	0	0
Stool	M00098	Acylglycerol_degradation	PL11	-0.72745	136	0	0	0
Stool	M00098	Acylglycerol_degradation	GH95	-0.731587	136	0	0	0
Stool	M00098	Acylglycerol_degradation	GH106	-0.735279	136	0	0	0
Stool	M00098	Acylglycerol_degradation	GH88	-0.735655	136	0	0	0
Stool	M00098	Acylglycerol_degradation	GH97	-0.739217	136	0	0	0
Stool	M00098	Acylglycerol_degradation	GH105	-0.740477	136	0	0	0
Stool	M00098	Acylglycerol_degradation	GH43	-0.74115	136	0	0	0
Stool	M00098	Acylglycerol_degradation	GH28	-0.745694	136	0	0	0
Stool	M00098	Acylglycerol_degradation	GH92	-0.748846	136	0	0	0
Stool	M00115	NAD_biosynthesis__aspartate_=__NAD	GH112	-0.653867	136	0	0	0
Stool	M00115	NAD_biosynthesis__aspartate_=__NAD	GH4	-0.674467	136	0	0	0
Stool	M00115	NAD_biosynthesis__aspartate_=__NAD	GH1	-0.67936	136	0	0	0
Stool	M00119	Pantothenate_biosynthesis__valine_L-aspartate_=__pantothenate	GH88	0.709366	136	0	0	0
Stool	M00119	Pantothenate_biosynthesis__valine_L-aspartate_=__pantothenate	GH92	0.659297	136	0	0	0
Stool	M00119	Pantothenate_biosynthesis__valine_L-aspartate_=__pantothenate	GH109	0.652794	136	0	0	0
Stool	M00119	Pantothenate_biosynthesis__valine_L-aspartate_=__pantothenate	PL8	0.648365	136	0	0	0
Stool	M00119	Pantothenate_biosynthesis__valine_L-aspartate_=__pantothenate	GH89	0.643917	136	0	0	0
Stool	M00119	Pantothenate_biosynthesis__valine_L-aspartate_=__pantothenate	GH112	-0.695428	136	0	0	0
Stool	M00119	Pantothenate_biosynthesis__valine_L-aspartate_=__pantothenate	GH4	-0.7276	136	0	0	0
Stool	M00119	Pantothenate_biosynthesis__valine_L-aspartate_=__pantothenate	GH94	-0.743906	136	0	0	0
Stool	M00119	Pantothenate_biosynthesis__valine_L-aspartate_=__pantothenate	GH1	-0.754524	136	0	0	0
Stool	M00123	Biotin_biosynthesis__pimeloyl-CoA_=__biotin	GH88	0.774732	136	0	0	0
Stool	M00123	Biotin_biosynthesis__pimeloyl-CoA_=__biotin	GH92	0.762848	136	0	0	0
Stool	M00123	Biotin_biosynthesis__pimeloyl-CoA_=__biotin	GH89	0.753294	136	0	0	0
Stool	M00123	Biotin_biosynthesis__pimeloyl-CoA_=__biotin	GH20	0.733947	136	0	0	0
Stool	M00123	Biotin_biosynthesis__pimeloyl-CoA_=__biotin	GH78	0.707082	136	0	0	0
Stool	M00123	Biotin_biosynthesis__pimeloyl-CoA_=__biotin	GH35	0.705459	136	0	0	0
Stool	M00123	Biotin_biosynthesis__pimeloyl-CoA_=__biotin	PL8	0.703714	136	0	0	0
Stool	M00123	Biotin_biosynthesis__pimeloyl-CoA_=__biotin	PL11	0.698896	136	0	0	0
Stool	M00123	Biotin_biosynthesis__pimeloyl-CoA_=__biotin	GH106	0.674905	136	0	0	0
Stool	M00123	Biotin_biosynthesis__pimeloyl-CoA_=__biotin	PL15	0.673876	136	0	0	0
Stool	M00123	Biotin_biosynthesis__pimeloyl-CoA_=__biotin	GH29	0.673209	136	0	0	0
Stool	M00123	Biotin_biosynthesis__pimeloyl-CoA_=__biotin	GH15	0.672067	136	0	0	0
Stool	M00123	Biotin_biosynthesis__pimeloyl-CoA_=__biotin	GH2	0.669684	136	0	0	0
Stool	M00123	Biotin_biosynthesis__pimeloyl-CoA_=__biotin	GH109	0.6589	136	0	0	0
Stool	M00123	Biotin_biosynthesis__pimeloyl-CoA_=__biotin	GH18	0.657495	136	0	0	0
Stool	M00123	Biotin_biosynthesis__pimeloyl-CoA_=__biotin	GH27	0.646877	136	0	0	0
Stool	M00123	Biotin_biosynthesis__pimeloyl-CoA_=__biotin	PL10	0.64546	136	0	0	0
Stool	M00123	Biotin_biosynthesis__pimeloyl-CoA_=__biotin	GH97	0.644358	136	0	0	0
Stool	M00123	Biotin_biosynthesis__pimeloyl-CoA_=__biotin	PL13	0.642905	136	0	0	0
Stool	M00123	Biotin_biosynthesis__pimeloyl-CoA_=__biotin	GH28	0.64239	136	0	0	0
Stool	M00123	Biotin_biosynthesis__pimeloyl-CoA_=__biotin	GH112	-0.710074	136	0	0	0
Stool	M00123	Biotin_biosynthesis__pimeloyl-CoA_=__biotin	GH1	-0.751236	136	0	0	0
Stool	M00123	Biotin_biosynthesis__pimeloyl-CoA_=__biotin	GH94	-0.793189	136	0	0	0
Stool	M00124	Pyridoxal_biosynthesis__erythrose-4P_=__pyridoxal-5P	GH88	0.80409	136	0	0	0
Stool	M00124	Pyridoxal_biosynthesis__erythrose-4P_=__pyridoxal-5P	PL8	0.7893	136	0	0	0
Stool	M00124	Pyridoxal_biosynthesis__erythrose-4P_=__pyridoxal-5P	PL15	0.77114	136	0	0	0
Stool	M00124	Pyridoxal_biosynthesis__erythrose-4P_=__pyridoxal-5P	PL13	0.764848	136	0	0	0
Stool	M00124	Pyridoxal_biosynthesis__erythrose-4P_=__pyridoxal-5P	GH18	0.75746	136	0	0	0
Stool	M00124	Pyridoxal_biosynthesis__erythrose-4P_=__pyridoxal-5P	GH92	0.738284	136	0	0	0
Stool	M00124	Pyridoxal_biosynthesis__erythrose-4P_=__pyridoxal-5P	PL12	0.729952	136	0	0	0
Stool	M00124	Pyridoxal_biosynthesis__erythrose-4P_=__pyridoxal-5P	GH89	0.716498	136	0	0	0
Stool	M00124	Pyridoxal_biosynthesis__erythrose-4P_=__pyridoxal-5P	GH76	0.713416	136	0	0	0
Stool	M00124	Pyridoxal_biosynthesis__erythrose-4P_=__pyridoxal-5P	GH50	0.712185	136	0	0	0
Stool	M00124	Pyridoxal_biosynthesis__erythrose-4P_=__pyridoxal-5P	GH35	0.684316	136	0	0	0
Stool	M00124	Pyridoxal_biosynthesis__erythrose-4P_=__pyridoxal-5P	GH78	0.660769	136	0	0	0
Stool	M00124	Pyridoxal_biosynthesis__erythrose-4P_=__pyridoxal-5P	GH20	0.652307	136	0	0	0
Stool	M00124	Pyridoxal_biosynthesis__erythrose-4P_=__pyridoxal-5P	GH16	0.650123	136	0	0	0
Stool	M00124	Pyridoxal_biosynthesis__erythrose-4P_=__pyridoxal-5P	GH33	0.648465	136	0	0	0
Stool	M00124	Pyridoxal_biosynthesis__erythrose-4P_=__pyridoxal-5P	GH66	0.643294	136	0	0	0
Stool	M00124	Pyridoxal_biosynthesis__erythrose-4P_=__pyridoxal-5P	GH38	0.641726	136	0	0	0
Stool	M00124	Pyridoxal_biosynthesis__erythrose-4P_=__pyridoxal-5P	GH105	0.640022	136	0	0	0
Stool	M00124	Pyridoxal_biosynthesis__erythrose-4P_=__pyridoxal-5P	GH1	-0.640768	136	0	0	0
Stool	M00124	Pyridoxal_biosynthesis__erythrose-4P_=__pyridoxal-5P	GH94	-0.711552	136	0	0	0
Stool	M00125	Riboflavin_biosynthesis__GTP_=__riboflavin_FMN_FAD	GH1	-0.645257	136	0	0	0
Stool	M00125	Riboflavin_biosynthesis__GTP_=__riboflavin_FMN_FAD	GH4	-0.655502	136	0	0	0
Stool	M00126	Tetrahydrofolate_biosynthesis__GTP_=__THF	GH88	0.742279	136	0	0	0
Stool	M00126	Tetrahydrofolate_biosynthesis__GTP_=__THF	GH92	0.719329	136	0	0	0
Stool	M00126	Tetrahydrofolate_biosynthesis__GTP_=__THF	GH20	0.707093	136	0	0	0
Stool	M00126	Tetrahydrofolate_biosynthesis__GTP_=__THF	GH89	0.693126	136	0	0	0
Stool	M00126	Tetrahydrofolate_biosynthesis__GTP_=__THF	PL8	0.67358	136	0	0	0
Stool	M00126	Tetrahydrofolate_biosynthesis__GTP_=__THF	GH106	0.667878	136	0	0	0
Stool	M00126	Tetrahydrofolate_biosynthesis__GTP_=__THF	GH33	0.665882	136	0	0	0
Stool	M00126	Tetrahydrofolate_biosynthesis__GTP_=__THF	PL11	0.660986	136	0	0	0
Stool	M00126	Tetrahydrofolate_biosynthesis__GTP_=__THF	GH97	0.658064	136	0	0	0
Stool	M00126	Tetrahydrofolate_biosynthesis__GTP_=__THF	PL13	0.651708	136	0	0	0
Stool	M00126	Tetrahydrofolate_biosynthesis__GTP_=__THF	GH2	0.65023	136	0	0	0
Stool	M00126	Tetrahydrofolate_biosynthesis__GTP_=__THF	GH29	0.648104	136	0	0	0
Stool	M00126	Tetrahydrofolate_biosynthesis__GTP_=__THF	PL10	0.647396	136	0	0	0
Stool	M00126	Tetrahydrofolate_biosynthesis__GTP_=__THF	GH15	0.640346	136	0	0	0
Stool	M00126	Tetrahydrofolate_biosynthesis__GTP_=__THF	GH109	0.640217	136	0	0	0
Stool	M00126	Tetrahydrofolate_biosynthesis__GTP_=__THF	GH78	0.639695	136	0	0	0
Stool	M00126	Tetrahydrofolate_biosynthesis__GTP_=__THF	GH112	-0.721674	136	0	0	0
Stool	M00126	Tetrahydrofolate_biosynthesis__GTP_=__THF	GH94	-0.736573	136	0	0	0
Stool	M00126	Tetrahydrofolate_biosynthesis__GTP_=__THF	GH1	-0.760016	136	0	0	0
Stool	M00126	Tetrahydrofolate_biosynthesis__GTP_=__THF	GH4	-0.76152	136	0	0	0
Stool	M00127	Thiamine_biosynthesis__AIR_=__thiamine-P_thiamine-2P	GH94	0.740417	136	0	0	0
Stool	M00127	Thiamine_biosynthesis__AIR_=__thiamine-P_thiamine-2P	GH1	0.683685	136	0	0	0
Stool	M00127	Thiamine_biosynthesis__AIR_=__thiamine-P_thiamine-2P	GH92	-0.640735	136	0	0	0
Stool	M00127	Thiamine_biosynthesis__AIR_=__thiamine-P_thiamine-2P	PL8	-0.686505	136	0	0	0
Stool	M00127	Thiamine_biosynthesis__AIR_=__thiamine-P_thiamine-2P	GH88	-0.705026	136	0	0	0
Stool	M00133	Polyamine_biosynthesis__arginine_=__agmatine_=__putrescine_=__spermidine	GH59	0.69896	136	0	0	0
Stool	M00144	Complex_I__NADH_dehydrogenase___NADH_dehydrogenase_I	GH112	-0.675836	136	0	0	0
Stool	M00144	Complex_I__NADH_dehydrogenase___NADH_dehydrogenase_I	GH1	-0.729255	136	0	0	0
Stool	M00150	Complex_II__succinate_dehydrogenase___fumarate_reductase___fumarate_reductase	GH102	0.763263	136	0	0	0
Stool	M00159	V-type_ATPase__prokaryotes	GH1	0.656452	136	0	0	0
Stool	M00178	Ribosome__bacteria	GH33	-0.642866	136	0	0	0
Stool	M00178	Ribosome__bacteria	GH89	-0.649205	136	0	0	0
Stool	M00178	Ribosome__bacteria	GH42	-0.651994	136	0	0	0
Stool	M00183	RNA_polymerase__bacteria	GH1	0.801194	136	0	0	0
Stool	M00183	RNA_polymerase__bacteria	GH112	0.800186	136	0	0	0
Stool	M00183	RNA_polymerase__bacteria	GH111	0.642133	136	0	0	0
Stool	M00185	Sulfate_transport_system	GH112	0.761613	136	0	0	0
Stool	M00185	Sulfate_transport_system	GH1	0.733294	136	0	0	0
Stool	M00189	Molybdate_transport_system	GH112	0.756509	136	0	0	0
Stool	M00189	Molybdate_transport_system	GH1	0.750494	136	0	0	0
Stool	M00189	Molybdate_transport_system	GH4	0.675514	136	0	0	0
Stool	M00193	Putative_spermidine_putrescine_transport_system	GH1	0.775668	136	0	0	0
Stool	M00193	Putative_spermidine_putrescine_transport_system	GH4	0.766974	136	0	0	0
Stool	M00193	Putative_spermidine_putrescine_transport_system	GH112	0.738382	136	0	0	0
Stool	M00193	Putative_spermidine_putrescine_transport_system	PL11	-0.640009	136	0	0	0
Stool	M00193	Putative_spermidine_putrescine_transport_system	GH43	-0.641047	136	0	0	0
Stool	M00193	Putative_spermidine_putrescine_transport_system	GH20	-0.6504	136	0	0	0
Stool	M00193	Putative_spermidine_putrescine_transport_system	GH105	-0.655258	136	0	0	0
Stool	M00193	Putative_spermidine_putrescine_transport_system	GH78	-0.657225	136	0	0	0
Stool	M00193	Putative_spermidine_putrescine_transport_system	GH33	-0.658526	136	0	0	0
Stool	M00193	Putative_spermidine_putrescine_transport_system	GH97	-0.660147	136	0	0	0
Stool	M00193	Putative_spermidine_putrescine_transport_system	GH89	-0.673693	136	0	0	0
Stool	M00193	Putative_spermidine_putrescine_transport_system	GH88	-0.687337	136	0	0	0
Stool	M00193	Putative_spermidine_putrescine_transport_system	GH92	-0.703819	136	0	0	0
Stool	M00194	Maltose_maltodextrin_transport_system	GH112	0.862406	136	0	0	0
Stool	M00194	Maltose_maltodextrin_transport_system	GH1	0.835976	136	0	0	0
Stool	M00194	Maltose_maltodextrin_transport_system	GH4	0.74407	136	0	0	0
Stool	M00194	Maltose_maltodextrin_transport_system	GH94	0.696669	136	0	0	0
Stool	M00194	Maltose_maltodextrin_transport_system	GH113	0.653908	136	0	0	0
Stool	M00197	Putative_sugar_transport_system	GH112	0.870769	136	0	0	0
Stool	M00197	Putative_sugar_transport_system	GH1	0.849294	136	0	0	0
Stool	M00197	Putative_sugar_transport_system	GH94	0.71328	136	0	0	0
Stool	M00197	Putative_sugar_transport_system	GH113	0.666586	136	0	0	0
Stool	M00197	Putative_sugar_transport_system	GH114	0.660314	136	0	0	0
Stool	M00198	sn-Glycerol_3-phosphate_transport_system	GH1	0.809164	136	0	0	0
Stool	M00198	sn-Glycerol_3-phosphate_transport_system	GH4	0.80125	136	0	0	0
Stool	M00198	sn-Glycerol_3-phosphate_transport_system	GH112	0.79902	136	0	0	0
Stool	M00198	sn-Glycerol_3-phosphate_transport_system	GH105	-0.641863	136	0	0	0
Stool	M00198	sn-Glycerol_3-phosphate_transport_system	GH95	-0.644302	136	0	0	0
Stool	M00198	sn-Glycerol_3-phosphate_transport_system	GH43	-0.645748	136	0	0	0
Stool	M00198	sn-Glycerol_3-phosphate_transport_system	GH106	-0.64863	136	0	0	0
Stool	M00198	sn-Glycerol_3-phosphate_transport_system	GH20	-0.660342	136	0	0	0
Stool	M00198	sn-Glycerol_3-phosphate_transport_system	GH92	-0.672748	136	0	0	0
Stool	M00198	sn-Glycerol_3-phosphate_transport_system	GH97	-0.677104	136	0	0	0
Stool	M00199	Lactose_L-arabinose_transport_system	GH112	0.863297	136	0	0	0
Stool	M00199	Lactose_L-arabinose_transport_system	GH1	0.80293	136	0	0	0
Stool	M00199	Lactose_L-arabinose_transport_system	GH4	0.739632	136	0	0	0
Stool	M00199	Lactose_L-arabinose_transport_system	GH94	0.665757	136	0	0	0
Stool	M00200	Sorbitol_mannitol_transport_system	GH1	0.779743	136	0	0	0
Stool	M00200	Sorbitol_mannitol_transport_system	GH4	0.762197	136	0	0	0
Stool	M00201	alpha-Glucoside_transport_system	GH112	0.844595	136	0	0	0
Stool	M00201	alpha-Glucoside_transport_system	GH4	0.803723	136	0	0	0
Stool	M00202	Oligogalacturonide_transport_system	GH1	0.839583	136	0	0	0
Stool	M00202	Oligogalacturonide_transport_system	GH112	0.835744	136	0	0	0
Stool	M00202	Oligogalacturonide_transport_system	GH2	-0.649078	136	0	0	0
Stool	M00202	Oligogalacturonide_transport_system	GH115	-0.649638	136	0	0	0
Stool	M00202	Oligogalacturonide_transport_system	GH97	-0.652287	136	0	0	0
Stool	M00202	Oligogalacturonide_transport_system	GH95	-0.659586	136	0	0	0
Stool	M00202	Oligogalacturonide_transport_system	GH106	-0.669827	136	0	0	0
Stool	M00202	Oligogalacturonide_transport_system	GH28	-0.676345	136	0	0	0
Stool	M00204	Trehalose_maltose_transport_system	GH1	0.794612	136	0	0	0
Stool	M00204	Trehalose_maltose_transport_system	GH112	0.767945	136	0	0	0
Stool	M00204	Trehalose_maltose_transport_system	GH4	0.701362	136	0	0	0
Stool	M00206	Cellobiose_transport_system	GH112	0.834426	136	0	0	0
Stool	M00206	Cellobiose_transport_system	GH1	0.822627	136	0	0	0
Stool	M00206	Cellobiose_transport_system	GH4	0.790262	136	0	0	0
Stool	M00206	Cellobiose_transport_system	GH113	0.656877	136	0	0	0
Stool	M00206	Cellobiose_transport_system	GH94	0.648063	136	0	0	0
Stool	M00207	Multiple_sugar_transport_system	GH1	0.873123	136	0	0	0
Stool	M00207	Multiple_sugar_transport_system	GH112	0.864038	136	0	0	0
Stool	M00207	Multiple_sugar_transport_system	GH4	0.859539	136	0	0	0
Stool	M00207	Multiple_sugar_transport_system	GH111	0.675872	136	0	0	0
Stool	M00207	Multiple_sugar_transport_system	GH2	-0.642904	136	0	0	0
Stool	M00207	Multiple_sugar_transport_system	GH88	-0.651446	136	0	0	0
Stool	M00207	Multiple_sugar_transport_system	GH95	-0.653766	136	0	0	0
Stool	M00207	Multiple_sugar_transport_system	GH105	-0.656176	136	0	0	0
Stool	M00207	Multiple_sugar_transport_system	GH89	-0.657296	136	0	0	0
Stool	M00207	Multiple_sugar_transport_system	GH43	-0.660907	136	0	0	0
Stool	M00207	Multiple_sugar_transport_system	GH115	-0.668423	136	0	0	0
Stool	M00207	Multiple_sugar_transport_system	GH97	-0.668505	136	0	0	0
Stool	M00207	Multiple_sugar_transport_system	PL11	-0.670378	136	0	0	0
Stool	M00207	Multiple_sugar_transport_system	GH106	-0.671312	136	0	0	0
Stool	M00207	Multiple_sugar_transport_system	GH28	-0.674944	136	0	0	0
Stool	M00207	Multiple_sugar_transport_system	GH92	-0.689589	136	0	0	0
Stool	M00219	AI-2_transport_system	GH1	0.738563	136	0	0	0
Stool	M00219	AI-2_transport_system	GH112	0.718385	136	0	0	0
Stool	M00220	Rhamnose_transport_system	GH112	0.703186	136	0	0	0
Stool	M00220	Rhamnose_transport_system	GH4	0.657784	136	0	0	0
Stool	M00225	Lysine_arginine_ornithine_transport_system	GH1	0.700603	136	0	0	0
Stool	M00225	Lysine_arginine_ornithine_transport_system	GH4	0.675853	136	0	0	0
Stool	M00225	Lysine_arginine_ornithine_transport_system	GH112	0.651132	136	0	0	0
Stool	M00226	Histidine_transport_system	GH4	0.670323	136	0	0	0
Stool	M00226	Histidine_transport_system	GH1	0.669896	136	0	0	0
Stool	M00232	General_L-amino_acid_transport_system	GH102	0.734797	136	0	0	0
Stool	M00233	Glutamate_transport_system	GH1	0.672977	136	0	0	0
Stool	M00233	Glutamate_transport_system	GH4	0.642464	136	0	0	0
Stool	M00237	Branched-chain_amino_acid_transport_system	GH1	0.779199	136	0	0	0
Stool	M00237	Branched-chain_amino_acid_transport_system	GH112	0.734996	136	0	0	0
Stool	M00237	Branched-chain_amino_acid_transport_system	GH94	0.651733	136	0	0	0
Stool	M00237	Branched-chain_amino_acid_transport_system	GH35	-0.658439	136	0	0	0
Stool	M00237	Branched-chain_amino_acid_transport_system	GH78	-0.663482	136	0	0	0
Stool	M00237	Branched-chain_amino_acid_transport_system	GH33	-0.67546	136	0	0	0
Stool	M00237	Branched-chain_amino_acid_transport_system	PL1	-0.67767	136	0	0	0
Stool	M00237	Branched-chain_amino_acid_transport_system	GH2	-0.707218	136	0	0	0
Stool	M00237	Branched-chain_amino_acid_transport_system	GH106	-0.709852	136	0	0	0
Stool	M00237	Branched-chain_amino_acid_transport_system	GH20	-0.710052	136	0	0	0
Stool	M00237	Branched-chain_amino_acid_transport_system	GH105	-0.712453	136	0	0	0
Stool	M00237	Branched-chain_amino_acid_transport_system	GH89	-0.713138	136	0	0	0
Stool	M00237	Branched-chain_amino_acid_transport_system	GH115	-0.71462	136	0	0	0
Stool	M00237	Branched-chain_amino_acid_transport_system	GH97	-0.720455	136	0	0	0
Stool	M00237	Branched-chain_amino_acid_transport_system	GH28	-0.720858	136	0	0	0
Stool	M00237	Branched-chain_amino_acid_transport_system	GH43	-0.726578	136	0	0	0
Stool	M00237	Branched-chain_amino_acid_transport_system	GH88	-0.727357	136	0	0	0
Stool	M00237	Branched-chain_amino_acid_transport_system	GH95	-0.73054	136	0	0	0
Stool	M00237	Branched-chain_amino_acid_transport_system	GH92	-0.733317	136	0	0	0
Stool	M00239	Peptides_nickel_transport_system	GH4	0.827184	136	0	0	0
Stool	M00239	Peptides_nickel_transport_system	GH1	0.823292	136	0	0	0
Stool	M00239	Peptides_nickel_transport_system	GH111	0.679899	136	0	0	0
Stool	M00239	Peptides_nickel_transport_system	GH89	-0.647924	136	0	0	0
Stool	M00239	Peptides_nickel_transport_system	PL1	-0.648387	136	0	0	0
Stool	M00239	Peptides_nickel_transport_system	PL11	-0.65055	136	0	0	0
Stool	M00239	Peptides_nickel_transport_system	GH20	-0.65055	136	0	0	0
Stool	M00239	Peptides_nickel_transport_system	GH105	-0.664205	136	0	0	0
Stool	M00239	Peptides_nickel_transport_system	GH2	-0.664854	136	0	0	0
Stool	M00239	Peptides_nickel_transport_system	GH115	-0.674405	136	0	0	0
Stool	M00239	Peptides_nickel_transport_system	GH88	-0.6756	136	0	0	0
Stool	M00239	Peptides_nickel_transport_system	GH106	-0.67578	136	0	0	0
Stool	M00239	Peptides_nickel_transport_system	GH95	-0.68038	136	0	0	0
Stool	M00239	Peptides_nickel_transport_system	GH28	-0.683063	136	0	0	0
Stool	M00239	Peptides_nickel_transport_system	GH92	-0.686964	136	0	0	0
Stool	M00239	Peptides_nickel_transport_system	GH43	-0.687315	136	0	0	0
Stool	M00239	Peptides_nickel_transport_system	GH97	-0.694822	136	0	0	0
Stool	M00245	Cobalt_transport_system	GH4	0.656219	136	0	0	0
Stool	M00270	PTS_system__trehalose-specific_II_component	GH1	0.808525	136	0	0	0
Stool	M00270	PTS_system__trehalose-specific_II_component	GH112	0.76088	136	0	0	0
Stool	M00270	PTS_system__trehalose-specific_II_component	GH4	0.752434	136	0	0	0
Stool	M00270	PTS_system__trehalose-specific_II_component	GH115	-0.643542	136	0	0	0
Stool	M00270	PTS_system__trehalose-specific_II_component	GH97	-0.644076	136	0	0	0
Stool	M00276	PTS_system__mannose-specific_II_component	GH1	0.797514	136	0	0	0
Stool	M00276	PTS_system__mannose-specific_II_component	GH4	0.753339	136	0	0	0
Stool	M00276	PTS_system__mannose-specific_II_component	GH112	0.710852	136	0	0	0
Stool	M00277	PTS_system__N-acetylgalactosamine-specific_II_component	GH1	0.703644	136	0	0	0
Stool	M00277	PTS_system__N-acetylgalactosamine-specific_II_component	GH4	0.69947	136	0	0	0
Stool	M00277	PTS_system__N-acetylgalactosamine-specific_II_component	GH112	0.688724	136	0	0	0
Stool	M00287	PTS_system__galactosamine-specific_II_component	GH1	0.721437	136	0	0	0
Stool	M00287	PTS_system__galactosamine-specific_II_component	GH112	0.709636	136	0	0	0
Stool	M00287	PTS_system__galactosamine-specific_II_component	GH4	0.705953	136	0	0	0
Stool	M00300	Putrescine_transport_system	GH1	0.802408	136	0	0	0
Stool	M00300	Putrescine_transport_system	GH4	0.799409	136	0	0	0
Stool	M00300	Putrescine_transport_system	GH112	0.775676	136	0	0	0
Stool	M00300	Putrescine_transport_system	GH15	-0.676055	136	0	0	0
Stool	M00300	Putrescine_transport_system	GH33	-0.682916	136	0	0	0
Stool	M00300	Putrescine_transport_system	PL10	-0.683482	136	0	0	0
Stool	M00300	Putrescine_transport_system	GH95	-0.6838	136	0	0	0
Stool	M00300	Putrescine_transport_system	GH97	-0.691744	136	0	0	0
Stool	M00300	Putrescine_transport_system	GH78	-0.694015	136	0	0	0
Stool	M00300	Putrescine_transport_system	GH43	-0.696616	136	0	0	0
Stool	M00300	Putrescine_transport_system	GH2	-0.703603	136	0	0	0
Stool	M00300	Putrescine_transport_system	GH105	-0.710964	136	0	0	0
Stool	M00300	Putrescine_transport_system	GH20	-0.716024	136	0	0	0
Stool	M00300	Putrescine_transport_system	GH28	-0.718374	136	0	0	0
Stool	M00300	Putrescine_transport_system	GH88	-0.718698	136	0	0	0
Stool	M00300	Putrescine_transport_system	GH89	-0.722387	136	0	0	0
Stool	M00300	Putrescine_transport_system	PL11	-0.724449	136	0	0	0
Stool	M00300	Putrescine_transport_system	GH106	-0.728848	136	0	0	0
Stool	M00300	Putrescine_transport_system	GH92	-0.739587	136	0	0	0
Stool	M00311	2-oxoglutarate_ferredoxin_oxidoreductase	GH111	-0.639363	136	0	0	0
Stool	M00311	2-oxoglutarate_ferredoxin_oxidoreductase	GH112	-0.793048	136	0	0	0
Stool	M00311	2-oxoglutarate_ferredoxin_oxidoreductase	GH1	-0.819064	136	0	0	0
Stool	M00324	Dipeptide_transport_system	GH4	0.796758	136	0	0	0
Stool	M00324	Dipeptide_transport_system	GH1	0.77547	136	0	0	0
Stool	M00324	Dipeptide_transport_system	GH112	0.767137	136	0	0	0
Stool	M00324	Dipeptide_transport_system	GH111	0.706065	136	0	0	0
Stool	M00326	RTX_toxin_transport_system	GH1	0.703162	136	0	0	0
Stool	M00326	RTX_toxin_transport_system	GH4	0.669397	136	0	0	0
Stool	M00337	Immunoproteasome	GH47	0.696884	136	0	0	0
Stool	M00359	Aminoacyl-tRNA_biosynthesis__eukaryotes	GH89	-0.665264	136	0	0	0
Stool	M00359	Aminoacyl-tRNA_biosynthesis__eukaryotes	GH42	-0.699205	136	0	0	0
Stool	M00360	Aminoacyl-tRNA_biosynthesis__prokaryotes	GH89	-0.658066	136	0	0	0
Stool	M00360	Aminoacyl-tRNA_biosynthesis__prokaryotes	GH42	-0.696636	136	0	0	0
Stool	M00361	Nucleotide_sugar_biosynthesis__eukaryotes	GH112	0.813788	136	0	0	0
Stool	M00361	Nucleotide_sugar_biosynthesis__eukaryotes	GH1	0.784012	136	0	0	0
Stool	M00361	Nucleotide_sugar_biosynthesis__eukaryotes	GH4	0.726286	136	0	0	0
Stool	M00361	Nucleotide_sugar_biosynthesis__eukaryotes	GH114	0.646245	136	0	0	0
Stool	M00361	Nucleotide_sugar_biosynthesis__eukaryotes	GH95	-0.639332	136	0	0	0
Stool	M00361	Nucleotide_sugar_biosynthesis__eukaryotes	GH20	-0.639497	136	0	0	0
Stool	M00361	Nucleotide_sugar_biosynthesis__eukaryotes	GH28	-0.640293	136	0	0	0
Stool	M00361	Nucleotide_sugar_biosynthesis__eukaryotes	GH88	-0.64692	136	0	0	0
Stool	M00361	Nucleotide_sugar_biosynthesis__eukaryotes	GH78	-0.652607	136	0	0	0
Stool	M00361	Nucleotide_sugar_biosynthesis__eukaryotes	PL11	-0.665933	136	0	0	0
Stool	M00361	Nucleotide_sugar_biosynthesis__eukaryotes	GH89	-0.670725	136	0	0	0
Stool	M00361	Nucleotide_sugar_biosynthesis__eukaryotes	GH33	-0.680694	136	0	0	0
Stool	M00361	Nucleotide_sugar_biosynthesis__eukaryotes	GH92	-0.682016	136	0	0	0
Supragingival plaque	M00001	Glycolysis__Embden-Meyerhof_pathway___glucose_=__pyruvate	GH102	-0.696478	115	0	0	0
Supragingival plaque	M00002	Glycolysis__core_module_involving_three-carbon_compounds	GH103	-0.747335	115	0	0	0
Supragingival plaque	M00002	Glycolysis__core_module_involving_three-carbon_compounds	GH102	-0.766079	115	0	0	0
Supragingival plaque	M00004	Pentose_phosphate_pathway__Pentose_phosphate_cycle_	GH28	-0.692709	115	0	0	0
Supragingival plaque	M00004	Pentose_phosphate_pathway__Pentose_phosphate_cycle_	GH27	-0.695525	115	0	0	0
Supragingival plaque	M00004	Pentose_phosphate_pathway__Pentose_phosphate_cycle_	GH109	-0.698575	115	0	0	0
Supragingival plaque	M00004	Pentose_phosphate_pathway__Pentose_phosphate_cycle_	GH78	-0.701287	115	0	0	0
Supragingival plaque	M00004	Pentose_phosphate_pathway__Pentose_phosphate_cycle_	GH105	-0.706836	115	0	0	0
Supragingival plaque	M00004	Pentose_phosphate_pathway__Pentose_phosphate_cycle_	GH5	-0.718712	115	0	0	0
Supragingival plaque	M00004	Pentose_phosphate_pathway__Pentose_phosphate_cycle_	GH57	-0.757712	115	0	0	0
Supragingival plaque	M00006	Pentose_phosphate_pathway__oxidative_phase__glucose_6P_=__ribulose_5P	GH27	-0.691096	115	0	0	0
Supragingival plaque	M00006	Pentose_phosphate_pathway__oxidative_phase__glucose_6P_=__ribulose_5P	GH26	-0.692385	115	0	0	0
Supragingival plaque	M00006	Pentose_phosphate_pathway__oxidative_phase__glucose_6P_=__ribulose_5P	GH30	-0.699475	115	0	0	0
Supragingival plaque	M00006	Pentose_phosphate_pathway__oxidative_phase__glucose_6P_=__ribulose_5P	GH114	-0.710004	115	0	0	0
Supragingival plaque	M00006	Pentose_phosphate_pathway__oxidative_phase__glucose_6P_=__ribulose_5P	GH63	-0.711825	115	0	0	0
Supragingival plaque	M00006	Pentose_phosphate_pathway__oxidative_phase__glucose_6P_=__ribulose_5P	GH97	-0.714438	115	0	0	0
Supragingival plaque	M00006	Pentose_phosphate_pathway__oxidative_phase__glucose_6P_=__ribulose_5P	GH51	-0.718777	115	0	0	0
Supragingival plaque	M00006	Pentose_phosphate_pathway__oxidative_phase__glucose_6P_=__ribulose_5P	GH106	-0.72453	115	0	0	0
Supragingival plaque	M00006	Pentose_phosphate_pathway__oxidative_phase__glucose_6P_=__ribulose_5P	GH116	-0.726334	115	0	0	0
Supragingival plaque	M00006	Pentose_phosphate_pathway__oxidative_phase__glucose_6P_=__ribulose_5P	GH4	-0.727942	115	0	0	0
Supragingival plaque	M00006	Pentose_phosphate_pathway__oxidative_phase__glucose_6P_=__ribulose_5P	GH28	-0.738528	115	0	0	0
Supragingival plaque	M00006	Pentose_phosphate_pathway__oxidative_phase__glucose_6P_=__ribulose_5P	GH109	-0.742243	115	0	0	0
Supragingival plaque	M00006	Pentose_phosphate_pathway__oxidative_phase__glucose_6P_=__ribulose_5P	GH105	-0.750178	115	0	0	0
Supragingival plaque	M00006	Pentose_phosphate_pathway__oxidative_phase__glucose_6P_=__ribulose_5P	GH5	-0.755313	115	0	0	0
Supragingival plaque	M00006	Pentose_phosphate_pathway__oxidative_phase__glucose_6P_=__ribulose_5P	GH43	-0.763482	115	0	0	0
Supragingival plaque	M00006	Pentose_phosphate_pathway__oxidative_phase__glucose_6P_=__ribulose_5P	GH89	-0.76645	115	0	0	0
Supragingival plaque	M00006	Pentose_phosphate_pathway__oxidative_phase__glucose_6P_=__ribulose_5P	GH78	-0.770263	115	0	0	0
Supragingival plaque	M00006	Pentose_phosphate_pathway__oxidative_phase__glucose_6P_=__ribulose_5P	GH57	-0.81318	115	0	0	0
Supragingival plaque	M00023	Tryptophan_biosynthesis__chorismate_=__tryptophan	GH115	-0.681888	115	0	0	0
Supragingival plaque	M00023	Tryptophan_biosynthesis__chorismate_=__tryptophan	GH28	-0.687149	115	0	0	0
Supragingival plaque	M00023	Tryptophan_biosynthesis__chorismate_=__tryptophan	GH116	-0.695677	115	0	0	0
Supragingival plaque	M00023	Tryptophan_biosynthesis__chorismate_=__tryptophan	GH106	-0.69722	115	0	0	0
Supragingival plaque	M00023	Tryptophan_biosynthesis__chorismate_=__tryptophan	GH114	-0.698283	115	0	0	0
Supragingival plaque	M00023	Tryptophan_biosynthesis__chorismate_=__tryptophan	GH24	-0.712644	115	0	0	0
Supragingival plaque	M00023	Tryptophan_biosynthesis__chorismate_=__tryptophan	GH63	-0.734885	115	0	0	0
Supragingival plaque	M00023	Tryptophan_biosynthesis__chorismate_=__tryptophan	GH51	-0.737114	115	0	0	0
Supragingival plaque	M00023	Tryptophan_biosynthesis__chorismate_=__tryptophan	GH27	-0.767932	115	0	0	0
Supragingival plaque	M00023	Tryptophan_biosynthesis__chorismate_=__tryptophan	GH89	-0.773477	115	0	0	0
Supragingival plaque	M00023	Tryptophan_biosynthesis__chorismate_=__tryptophan	GH43	-0.779749	115	0	0	0
Supragingival plaque	M00036	Leucine_degradation__leucine_=__acetoacetate___acetyl-CoA	GH89	0.697129	115	0	0	0
Supragingival plaque	M00036	Leucine_degradation__leucine_=__acetoacetate___acetyl-CoA	GH106	0.688872	115	0	0	0
Supragingival plaque	M00036	Leucine_degradation__leucine_=__acetoacetate___acetyl-CoA	GH28	0.686667	115	0	0	0
Supragingival plaque	M00036	Leucine_degradation__leucine_=__acetoacetate___acetyl-CoA	GH105	0.684664	115	0	0	0
Supragingival plaque	M00049	Adenine_nucleotide_biosynthesis__IMP_=__ADP_dADP_ATP_dATP	GH102	-0.716724	115	0	0	0
Supragingival plaque	M00049	Adenine_nucleotide_biosynthesis__IMP_=__ADP_dADP_ATP_dATP	GH103	-0.724215	115	0	0	0
Supragingival plaque	M00050	Guanine_nucleotide_biosynthesis__IMP_=__GDP_dGDP_GTP_dGTP	GH102	-0.750059	115	0	0	0
Supragingival plaque	M00050	Guanine_nucleotide_biosynthesis__IMP_=__GDP_dGDP_GTP_dGTP	GH103	-0.753599	115	0	0	0
Supragingival plaque	M00060	Lipopolysaccharide_biosynthesis__KDO2-lipid_A	GH97	0.706384	115	0	0	0
Supragingival plaque	M00060	Lipopolysaccharide_biosynthesis__KDO2-lipid_A	GH92	0.693193	115	0	0	0
Supragingival plaque	M00060	Lipopolysaccharide_biosynthesis__KDO2-lipid_A	GH27	0.691779	115	0	0	0
Supragingival plaque	M00060	Lipopolysaccharide_biosynthesis__KDO2-lipid_A	GH57	0.681659	115	0	0	0
Supragingival plaque	M00061	Uronic_acid_metabolism	GH28	0.782046	115	0	0	0
Supragingival plaque	M00061	Uronic_acid_metabolism	GH106	0.776218	115	0	0	0
Supragingival plaque	M00061	Uronic_acid_metabolism	GH43	0.771272	115	0	0	0
Supragingival plaque	M00061	Uronic_acid_metabolism	GH89	0.76854	115	0	0	0
Supragingival plaque	M00061	Uronic_acid_metabolism	GH105	0.74933	115	0	0	0
Supragingival plaque	M00061	Uronic_acid_metabolism	GH51	0.737143	115	0	0	0
Supragingival plaque	M00077	Chondroitin_sulfate_degradation	GH43	0.71848	115	0	0	0
Supragingival plaque	M00079	Keratan_sulfate_degradation	GH43	0.82392	115	0	0	0
Supragingival plaque	M00079	Keratan_sulfate_degradation	GH106	0.794957	115	0	0	0
Supragingival plaque	M00079	Keratan_sulfate_degradation	GH27	0.78076	115	0	0	0
Supragingival plaque	M00079	Keratan_sulfate_degradation	GH51	0.770694	115	0	0	0
Supragingival plaque	M00079	Keratan_sulfate_degradation	GH105	0.765895	115	0	0	0
Supragingival plaque	M00079	Keratan_sulfate_degradation	GH28	0.74669	115	0	0	0
Supragingival plaque	M00079	Keratan_sulfate_degradation	GH63	0.719636	115	0	0	0
Supragingival plaque	M00079	Keratan_sulfate_degradation	GH24	0.694218	115	0	0	0
Supragingival plaque	M00079	Keratan_sulfate_degradation	GH10	0.689415	115	0	0	0
Supragingival plaque	M00079	Keratan_sulfate_degradation	GH67	0.684384	115	0	0	0
Supragingival plaque	M00118	Glutathione_biosynthesis__glutamate_=__glutathione	GH102	0.730152	115	0	0	0
Supragingival plaque	M00124	Pyridoxal_biosynthesis__erythrose-4P_=__pyridoxal-5P	GH89	0.772093	115	0	0	0
Supragingival plaque	M00124	Pyridoxal_biosynthesis__erythrose-4P_=__pyridoxal-5P	GH116	0.765425	115	0	0	0
Supragingival plaque	M00124	Pyridoxal_biosynthesis__erythrose-4P_=__pyridoxal-5P	GH27	0.759562	115	0	0	0
Supragingival plaque	M00124	Pyridoxal_biosynthesis__erythrose-4P_=__pyridoxal-5P	GH43	0.756206	115	0	0	0
Supragingival plaque	M00124	Pyridoxal_biosynthesis__erythrose-4P_=__pyridoxal-5P	GH51	0.750879	115	0	0	0
Supragingival plaque	M00124	Pyridoxal_biosynthesis__erythrose-4P_=__pyridoxal-5P	GH106	0.746085	115	0	0	0
Supragingival plaque	M00124	Pyridoxal_biosynthesis__erythrose-4P_=__pyridoxal-5P	GH105	0.71737	115	0	0	0
Supragingival plaque	M00124	Pyridoxal_biosynthesis__erythrose-4P_=__pyridoxal-5P	GH63	0.698519	115	0	0	0
Supragingival plaque	M00126	Tetrahydrofolate_biosynthesis__GTP_=__THF	GH97	0.779447	115	0	0	0
Supragingival plaque	M00126	Tetrahydrofolate_biosynthesis__GTP_=__THF	GH6	0.77298	115	0	0	0
Supragingival plaque	M00126	Tetrahydrofolate_biosynthesis__GTP_=__THF	GH57	0.771577	115	0	0	0
Supragingival plaque	M00126	Tetrahydrofolate_biosynthesis__GTP_=__THF	GH109	0.759704	115	0	0	0
Supragingival plaque	M00126	Tetrahydrofolate_biosynthesis__GTP_=__THF	GH16	0.750187	115	0	0	0
Supragingival plaque	M00126	Tetrahydrofolate_biosynthesis__GTP_=__THF	GH30	0.743063	115	0	0	0
Supragingival plaque	M00126	Tetrahydrofolate_biosynthesis__GTP_=__THF	GH110	0.735764	115	0	0	0
Supragingival plaque	M00126	Tetrahydrofolate_biosynthesis__GTP_=__THF	GH66	0.728959	115	0	0	0
Supragingival plaque	M00126	Tetrahydrofolate_biosynthesis__GTP_=__THF	GH5	0.719598	115	0	0	0
Supragingival plaque	M00126	Tetrahydrofolate_biosynthesis__GTP_=__THF	GH92	0.681255	115	0	0	0
Supragingival plaque	M00133	Polyamine_biosynthesis__arginine_=__agmatine_=__putrescine_=__spermidine	GH57	0.81975	115	0	0	0
Supragingival plaque	M00133	Polyamine_biosynthesis__arginine_=__agmatine_=__putrescine_=__spermidine	GH78	0.75535	115	0	0	0
Supragingival plaque	M00133	Polyamine_biosynthesis__arginine_=__agmatine_=__putrescine_=__spermidine	GH6	0.748314	115	0	0	0
Supragingival plaque	M00133	Polyamine_biosynthesis__arginine_=__agmatine_=__putrescine_=__spermidine	GH5	0.747225	115	0	0	0
Supragingival plaque	M00133	Polyamine_biosynthesis__arginine_=__agmatine_=__putrescine_=__spermidine	GH109	0.744644	115	0	0	0
Supragingival plaque	M00133	Polyamine_biosynthesis__arginine_=__agmatine_=__putrescine_=__spermidine	GH97	0.734847	115	0	0	0
Supragingival plaque	M00133	Polyamine_biosynthesis__arginine_=__agmatine_=__putrescine_=__spermidine	GH4	0.720736	115	0	0	0
Supragingival plaque	M00133	Polyamine_biosynthesis__arginine_=__agmatine_=__putrescine_=__spermidine	GH30	0.717509	115	0	0	0
Supragingival plaque	M00133	Polyamine_biosynthesis__arginine_=__agmatine_=__putrescine_=__spermidine	GH116	0.713775	115	0	0	0
Supragingival plaque	M00133	Polyamine_biosynthesis__arginine_=__agmatine_=__putrescine_=__spermidine	GH16	0.713097	115	0	0	0
Supragingival plaque	M00133	Polyamine_biosynthesis__arginine_=__agmatine_=__putrescine_=__spermidine	GH43	0.692427	115	0	0	0
Supragingival plaque	M00133	Polyamine_biosynthesis__arginine_=__agmatine_=__putrescine_=__spermidine	GH105	0.682186	115	0	0	0
Supragingival plaque	M00185	Sulfate_transport_system	GH103	0.768934	115	0	0	0
Supragingival plaque	M00202	Oligogalacturonide_transport_system	GH28	0.742708	115	0	0	0
Supragingival plaque	M00202	Oligogalacturonide_transport_system	GH105	0.723825	115	0	0	0
Supragingival plaque	M00202	Oligogalacturonide_transport_system	GH43	0.708889	115	0	0	0
Supragingival plaque	M00202	Oligogalacturonide_transport_system	GH114	0.700939	115	0	0	0
Supragingival plaque	M00202	Oligogalacturonide_transport_system	GH89	0.691774	115	0	0	0
Supragingival plaque	M00202	Oligogalacturonide_transport_system	GH106	0.683755	115	0	0	0
Supragingival plaque	M00222	Phosphate_transport_system	GH5	-0.686249	115	0	0	0
Supragingival plaque	M00222	Phosphate_transport_system	GH4	-0.690528	115	0	0	0
Supragingival plaque	M00222	Phosphate_transport_system	GH97	-0.691353	115	0	0	0
Supragingival plaque	M00222	Phosphate_transport_system	GH109	-0.703079	115	0	0	0
Supragingival plaque	M00222	Phosphate_transport_system	GH27	-0.70865	115	0	0	0
Supragingival plaque	M00233	Glutamate_transport_system	GH109	-0.686979	115	0	0	0
Supragingival plaque	M00233	Glutamate_transport_system	GH27	-0.728082	115	0	0	0
Supragingival plaque	M00276	PTS_system__mannose-specific_II_component	GH97	-0.704815	115	0	0	0
Supragingival plaque	M00276	PTS_system__mannose-specific_II_component	GH109	-0.705256	115	0	0	0
Supragingival plaque	M00276	PTS_system__mannose-specific_II_component	GH57	-0.715466	115	0	0	0
Supragingival plaque	M00307	Pyruvate_oxidation__pyruvate_=__acetyl-CoA	GH28	-0.685782	115	0	0	0
Supragingival plaque	M00307	Pyruvate_oxidation__pyruvate_=__acetyl-CoA	GH106	-0.711258	115	0	0	0
Supragingival plaque	M00307	Pyruvate_oxidation__pyruvate_=__acetyl-CoA	GH63	-0.712398	115	0	0	0
Supragingival plaque	M00307	Pyruvate_oxidation__pyruvate_=__acetyl-CoA	GH116	-0.727293	115	0	0	0
Supragingival plaque	M00307	Pyruvate_oxidation__pyruvate_=__acetyl-CoA	GH105	-0.733708	115	0	0	0
Supragingival plaque	M00307	Pyruvate_oxidation__pyruvate_=__acetyl-CoA	GH51	-0.742623	115	0	0	0
Supragingival plaque	M00307	Pyruvate_oxidation__pyruvate_=__acetyl-CoA	GH27	-0.745896	115	0	0	0
Supragingival plaque	M00307	Pyruvate_oxidation__pyruvate_=__acetyl-CoA	GH89	-0.759358	115	0	0	0
Supragingival plaque	M00307	Pyruvate_oxidation__pyruvate_=__acetyl-CoA	GH43	-0.788588	115	0	0	0
Supragingival plaque	M00311	2-oxoglutarate_ferredoxin_oxidoreductase	GH89	0.903034	115	0	0	0
Supragingival plaque	M00311	2-oxoglutarate_ferredoxin_oxidoreductase	GH43	0.884294	115	0	0	0
Supragingival plaque	M00311	2-oxoglutarate_ferredoxin_oxidoreductase	GH106	0.875275	115	0	0	0
Supragingival plaque	M00311	2-oxoglutarate_ferredoxin_oxidoreductase	GH51	0.84918	115	0	0	0
Supragingival plaque	M00311	2-oxoglutarate_ferredoxin_oxidoreductase	GH105	0.833468	115	0	0	0
Supragingival plaque	M00311	2-oxoglutarate_ferredoxin_oxidoreductase	GH63	0.822889	115	0	0	0
Supragingival plaque	M00311	2-oxoglutarate_ferredoxin_oxidoreductase	GH28	0.81059	115	0	0	0
Supragingival plaque	M00311	2-oxoglutarate_ferredoxin_oxidoreductase	GH27	0.8024	115	0	0	0
Supragingival plaque	M00311	2-oxoglutarate_ferredoxin_oxidoreductase	GH116	0.790025	115	0	0	0
Supragingival plaque	M00311	2-oxoglutarate_ferredoxin_oxidoreductase	GH115	0.736133	115	0	0	0
Supragingival plaque	M00311	2-oxoglutarate_ferredoxin_oxidoreductase	GH88	0.731925	115	0	0	0
Supragingival plaque	M00311	2-oxoglutarate_ferredoxin_oxidoreductase	GH53	0.721315	115	0	0	0
Supragingival plaque	M00311	2-oxoglutarate_ferredoxin_oxidoreductase	GH10	0.717393	115	0	0	0
Supragingival plaque	M00311	2-oxoglutarate_ferredoxin_oxidoreductase	PL11	0.712215	115	0	0	0
Supragingival plaque	M00311	2-oxoglutarate_ferredoxin_oxidoreductase	GH57	0.709869	115	0	0	0
Supragingival plaque	M00311	2-oxoglutarate_ferredoxin_oxidoreductase	GH114	0.709386	115	0	0	0
Supragingival plaque	M00311	2-oxoglutarate_ferredoxin_oxidoreductase	GH24	0.707542	115	0	0	0
Supragingival plaque	M00311	2-oxoglutarate_ferredoxin_oxidoreductase	GH67	0.705398	115	0	0	0
Supragingival plaque	M00311	2-oxoglutarate_ferredoxin_oxidoreductase	GH5	0.688732	115	0	0	0
Supragingival plaque	M00317	Manganese_iron_transport_system	GH17	0.755414	115	0	0	0
Supragingival plaque	M00348	Glutathione_transport_system	GH114	0.746625	115	0	0	0
Supragingival plaque	M00348	Glutathione_transport_system	GH43	0.736432	115	0	0	0
Supragingival plaque	M00348	Glutathione_transport_system	GH51	0.734388	115	0	0	0
Supragingival plaque	M00348	Glutathione_transport_system	GH28	0.712868	115	0	0	0
Supragingival plaque	M00348	Glutathione_transport_system	GH89	0.712762	115	0	0	0
Supragingival plaque	M00348	Glutathione_transport_system	GH105	0.710674	115	0	0	0
Supragingival plaque	M00348	Glutathione_transport_system	GH106	0.710413	115	0	0	0
Supragingival plaque	M00348	Glutathione_transport_system	GH26	0.70998	115	0	0	0
Supragingival plaque	M00348	Glutathione_transport_system	GH63	0.691404	115	0	0	0
Supragingival plaque	M00348	Glutathione_transport_system	GH4	0.691279	115	0	0	0
Supragingival plaque	M00349	Microcin_C_transport_system	GH103	0.684013	115	0	0	0
Supragingival plaque	M00349	Microcin_C_transport_system	GH17	0.683605	115	0	0	0
Supragingival plaque	M00359	Aminoacyl-tRNA_biosynthesis__eukaryotes	GH89	0.777909	115	0	0	0
Supragingival plaque	M00359	Aminoacyl-tRNA_biosynthesis__eukaryotes	GH57	0.765052	115	0	0	0
Supragingival plaque	M00359	Aminoacyl-tRNA_biosynthesis__eukaryotes	GH116	0.734282	115	0	0	0
Supragingival plaque	M00359	Aminoacyl-tRNA_biosynthesis__eukaryotes	GH106	0.727274	115	0	0	0
Supragingival plaque	M00359	Aminoacyl-tRNA_biosynthesis__eukaryotes	GH109	0.713283	115	0	0	0
Supragingival plaque	M00359	Aminoacyl-tRNA_biosynthesis__eukaryotes	GH63	0.707693	115	0	0	0
Supragingival plaque	M00359	Aminoacyl-tRNA_biosynthesis__eukaryotes	GH5	0.704292	115	0	0	0
Supragingival plaque	M00359	Aminoacyl-tRNA_biosynthesis__eukaryotes	GH105	0.703648	115	0	0	0
Supragingival plaque	M00359	Aminoacyl-tRNA_biosynthesis__eukaryotes	GH51	0.702877	115	0	0	0
Supragingival plaque	M00359	Aminoacyl-tRNA_biosynthesis__eukaryotes	GH78	0.695696	115	0	0	0
Supragingival plaque	M00359	Aminoacyl-tRNA_biosynthesis__eukaryotes	GH27	0.690376	115	0	0	0
Supragingival plaque	M00360	Aminoacyl-tRNA_biosynthesis__prokaryotes	GH89	0.724575	115	0	0	0
Supragingival plaque	M00360	Aminoacyl-tRNA_biosynthesis__prokaryotes	GH57	0.689843	115	0	0	0
Supragingival plaque	M00360	Aminoacyl-tRNA_biosynthesis__prokaryotes	GH43	0.685418	115	0	0	0
Supragingival plaque	M00366	C10-C20_isoprenoid_biosynthesis__plants	GH6	0.778287	115	0	0	0
Supragingival plaque	M00366	C10-C20_isoprenoid_biosynthesis__plants	GH57	0.729339	115	0	0	0
Supragingival plaque	M00366	C10-C20_isoprenoid_biosynthesis__plants	GH16	0.726048	115	0	0	0
Supragingival plaque	M00366	C10-C20_isoprenoid_biosynthesis__plants	GH110	0.698143	115	0	0	0
Supragingival plaque	M00366	C10-C20_isoprenoid_biosynthesis__plants	GH30	0.691176	115	0	0	0
Supragingival plaque	M00370	Glucosinolate_biosynthesis__tryptophan_=__glucobrassicin	GH100	0.81289	115	0	0	0
Tongue dorsum	M00001	Glycolysis__Embden-Meyerhof_pathway___glucose_=__pyruvate	GH103	-0.746935	123	0	0	0
Tongue dorsum	M00001	Glycolysis__Embden-Meyerhof_pathway___glucose_=__pyruvate	GH102	-0.747558	123	0	0	0
Tongue dorsum	M00002	Glycolysis__core_module_involving_three-carbon_compounds	GH103	-0.7513	123	0	0	0
Tongue dorsum	M00002	Glycolysis__core_module_involving_three-carbon_compounds	GH102	-0.761048	123	0	0	0
Tongue dorsum	M00004	Pentose_phosphate_pathway__Pentose_phosphate_cycle_	GH102	0.785259	123	0	0	0
Tongue dorsum	M00004	Pentose_phosphate_pathway__Pentose_phosphate_cycle_	GH103	0.770308	123	0	0	0
Tongue dorsum	M00004	Pentose_phosphate_pathway__Pentose_phosphate_cycle_	GH105	-0.71763	123	0	0	0
Tongue dorsum	M00004	Pentose_phosphate_pathway__Pentose_phosphate_cycle_	GH28	-0.721259	123	0	0	0
Tongue dorsum	M00006	Pentose_phosphate_pathway__oxidative_phase__glucose_6P_=__ribulose_5P	GH102	0.748406	123	0	0	0
Tongue dorsum	M00006	Pentose_phosphate_pathway__oxidative_phase__glucose_6P_=__ribulose_5P	GH103	0.730765	123	0	0	0
Tongue dorsum	M00006	Pentose_phosphate_pathway__oxidative_phase__glucose_6P_=__ribulose_5P	GH43	-0.686257	123	0	0	0
Tongue dorsum	M00006	Pentose_phosphate_pathway__oxidative_phase__glucose_6P_=__ribulose_5P	GH4	-0.699268	123	0	0	0
Tongue dorsum	M00006	Pentose_phosphate_pathway__oxidative_phase__glucose_6P_=__ribulose_5P	GH51	-0.727606	123	0	0	0
Tongue dorsum	M00006	Pentose_phosphate_pathway__oxidative_phase__glucose_6P_=__ribulose_5P	GH28	-0.765574	123	0	0	0
Tongue dorsum	M00006	Pentose_phosphate_pathway__oxidative_phase__glucose_6P_=__ribulose_5P	GH105	-0.766826	123	0	0	0
Tongue dorsum	M00007	Pentose_phosphate_pathway__non-oxidative_phase__fructose_6P_=__ribose_5P	GH4	0.677643	123	0	0	0
Tongue dorsum	M00008	Entner-Doudoroff_pathway__glucose-6P_=__glyceraldehyde-3P___pyruvate	GH65	0.703288	123	0	0	0
Tongue dorsum	M00009	Citrate_cycle__TCA_cycle__Krebs_cycle_	GH65	0.798269	123	0	0	0
Tongue dorsum	M00011	Citrate_cycle__second_carbon_oxidation	GH102	0.721429	123	0	0	0
Tongue dorsum	M00011	Citrate_cycle__second_carbon_oxidation	GH103	0.720212	123	0	0	0
Tongue dorsum	M00015	Proline_biosynthesis__glutamate_=__proline	GH57	-0.666036	123	0	0	0
Tongue dorsum	M00017	Methionine_biosynthesis__apartate_=__homoserine_=__methionine	GH1	0.704028	123	0	0	0
Tongue dorsum	M00017	Methionine_biosynthesis__apartate_=__homoserine_=__methionine	GH65	-0.768137	123	0	0	0
Tongue dorsum	M00018	Threonine_biosynthesis__apartate_=__homoserine_=__threonine	GH102	-0.684282	123	0	0	0
Tongue dorsum	M00018	Threonine_biosynthesis__apartate_=__homoserine_=__threonine	GH103	-0.696043	123	0	0	0
Tongue dorsum	M00018	Threonine_biosynthesis__apartate_=__homoserine_=__threonine	GH110	-0.724438	123	0	0	0
Tongue dorsum	M00018	Threonine_biosynthesis__apartate_=__homoserine_=__threonine	GH65	-0.78058	123	0	0	0
Tongue dorsum	M00019	Leucine_biosynthesis__pyruvate_=__2-oxoisovalerate_=__leucine	GH102	0.74198	123	0	0	0
Tongue dorsum	M00019	Leucine_biosynthesis__pyruvate_=__2-oxoisovalerate_=__leucine	GH103	0.717519	123	0	0	0
Tongue dorsum	M00021	Cysteine_biosynthesis__serine_=__cysteine	GH65	-0.713283	123	0	0	0
Tongue dorsum	M00022	Shikimate_pathway__phosphoenolpyruvate___erythrose-4P_=__chorismate	GH65	-0.692249	123	0	0	0
Tongue dorsum	M00023	Tryptophan_biosynthesis__chorismate_=__tryptophan	GH110	-0.722158	123	0	0	0
Tongue dorsum	M00036	Leucine_degradation__leucine_=__acetoacetate___acetyl-CoA	GH6	0.671047	123	0	0	0
Tongue dorsum	M00049	Adenine_nucleotide_biosynthesis__IMP_=__ADP_dADP_ATP_dATP	GH105	0.669357	123	0	0	0
Tongue dorsum	M00049	Adenine_nucleotide_biosynthesis__IMP_=__ADP_dADP_ATP_dATP	GH28	0.667503	123	0	0	0
Tongue dorsum	M00050	Guanine_nucleotide_biosynthesis__IMP_=__GDP_dGDP_GTP_dGTP	GH105	0.690004	123	0	0	0
Tongue dorsum	M00050	Guanine_nucleotide_biosynthesis__IMP_=__GDP_dGDP_GTP_dGTP	GH28	0.687138	123	0	0	0
Tongue dorsum	M00050	Guanine_nucleotide_biosynthesis__IMP_=__GDP_dGDP_GTP_dGTP	GH51	0.67527	123	0	0	0
Tongue dorsum	M00050	Guanine_nucleotide_biosynthesis__IMP_=__GDP_dGDP_GTP_dGTP	GH43	0.665766	123	0	0	0
Tongue dorsum	M00051	Uridine_monophosphate_biosynthesis__glutamine____PRPP__=__UMP	GH85	-0.665358	123	0	0	0
Tongue dorsum	M00060	Lipopolysaccharide_biosynthesis__KDO2-lipid_A	GH110	0.726448	123	0	0	0
Tongue dorsum	M00060	Lipopolysaccharide_biosynthesis__KDO2-lipid_A	GH1	-0.672462	123	0	0	0
Tongue dorsum	M00061	Uronic_acid_metabolism	GH105	0.805219	123	0	0	0
Tongue dorsum	M00061	Uronic_acid_metabolism	GH114	0.79743	123	0	0	0
Tongue dorsum	M00061	Uronic_acid_metabolism	GH28	0.788189	123	0	0	0
Tongue dorsum	M00061	Uronic_acid_metabolism	GH51	0.739635	123	0	0	0
Tongue dorsum	M00061	Uronic_acid_metabolism	GH88	0.735012	123	0	0	0
Tongue dorsum	M00061	Uronic_acid_metabolism	GH26	0.703563	123	0	0	0
Tongue dorsum	M00061	Uronic_acid_metabolism	GH53	0.70148	123	0	0	0
Tongue dorsum	M00061	Uronic_acid_metabolism	GH43	0.694855	123	0	0	0
Tongue dorsum	M00064	ADP-L-glycero-D-manno-heptose_biosynthesis	GH103	0.741294	123	0	0	0
Tongue dorsum	M00064	ADP-L-glycero-D-manno-heptose_biosynthesis	GH102	0.733069	123	0	0	0
Tongue dorsum	M00077	Chondroitin_sulfate_degradation	GH5	0.810412	123	0	0	0
Tongue dorsum	M00077	Chondroitin_sulfate_degradation	GH27	0.763092	123	0	0	0
Tongue dorsum	M00077	Chondroitin_sulfate_degradation	GH28	0.696985	123	0	0	0
Tongue dorsum	M00077	Chondroitin_sulfate_degradation	GH43	0.694689	123	0	0	0
Tongue dorsum	M00077	Chondroitin_sulfate_degradation	GH105	0.670988	123	0	0	0
Tongue dorsum	M00077	Chondroitin_sulfate_degradation	GH24	0.670013	123	0	0	0
Tongue dorsum	M00079	Keratan_sulfate_degradation	GH5	0.726276	123	0	0	0
Tongue dorsum	M00079	Keratan_sulfate_degradation	GH27	0.725087	123	0	0	0
Tongue dorsum	M00115	NAD_biosynthesis__aspartate_=__NAD	GH38	-0.674478	123	0	0	0
Tongue dorsum	M00115	NAD_biosynthesis__aspartate_=__NAD	GH35	-0.679612	123	0	0	0
Tongue dorsum	M00115	NAD_biosynthesis__aspartate_=__NAD	GH85	-0.706839	123	0	0	0
Tongue dorsum	M00117	Ubiquinone_biosynthesis__prokaryotes__chorismate_=__ubiquinone	GH65	0.876892	123	0	0	0
Tongue dorsum	M00117	Ubiquinone_biosynthesis__prokaryotes__chorismate_=__ubiquinone	GH103	0.702967	123	0	0	0
Tongue dorsum	M00117	Ubiquinone_biosynthesis__prokaryotes__chorismate_=__ubiquinone	GH102	0.698958	123	0	0	0
Tongue dorsum	M00118	Glutathione_biosynthesis__glutamate_=__glutathione	GH65	0.894904	123	0	0	0
Tongue dorsum	M00118	Glutathione_biosynthesis__glutamate_=__glutathione	GH103	0.713556	123	0	0	0
Tongue dorsum	M00118	Glutathione_biosynthesis__glutamate_=__glutathione	GH102	0.703035	123	0	0	0
Tongue dorsum	M00123	Biotin_biosynthesis__pimeloyl-CoA_=__biotin	GH65	0.665725	123	0	0	0
Tongue dorsum	M00123	Biotin_biosynthesis__pimeloyl-CoA_=__biotin	GH1	-0.667895	123	0	0	0
Tongue dorsum	M00125	Riboflavin_biosynthesis__GTP_=__riboflavin_FMN_FAD	GH109	0.713013	123	0	0	0
Tongue dorsum	M00125	Riboflavin_biosynthesis__GTP_=__riboflavin_FMN_FAD	GH97	0.702174	123	0	0	0
Tongue dorsum	M00125	Riboflavin_biosynthesis__GTP_=__riboflavin_FMN_FAD	GH16	0.682026	123	0	0	0
Tongue dorsum	M00126	Tetrahydrofolate_biosynthesis__GTP_=__THF	GH57	0.767325	123	0	0	0
Tongue dorsum	M00126	Tetrahydrofolate_biosynthesis__GTP_=__THF	GH16	0.756472	123	0	0	0
Tongue dorsum	M00126	Tetrahydrofolate_biosynthesis__GTP_=__THF	GH97	0.70169	123	0	0	0
Tongue dorsum	M00126	Tetrahydrofolate_biosynthesis__GTP_=__THF	GH27	0.66814	123	0	0	0
Tongue dorsum	M00126	Tetrahydrofolate_biosynthesis__GTP_=__THF	GH18	0.666984	123	0	0	0
Tongue dorsum	M00133	Polyamine_biosynthesis__arginine_=__agmatine_=__putrescine_=__spermidine	GH4	0.87468	123	0	0	0
Tongue dorsum	M00133	Polyamine_biosynthesis__arginine_=__agmatine_=__putrescine_=__spermidine	GH114	0.755699	123	0	0	0
Tongue dorsum	M00133	Polyamine_biosynthesis__arginine_=__agmatine_=__putrescine_=__spermidine	GH26	0.674636	123	0	0	0
Tongue dorsum	M00133	Polyamine_biosynthesis__arginine_=__agmatine_=__putrescine_=__spermidine	GH76	-0.691053	123	0	0	0
Tongue dorsum	M00136	GABA_biosynthesis__prokaryotes__putrescine_=__GABA	GH57	0.66894	123	0	0	0
Tongue dorsum	M00141	C1-unit_interconversion__eukaryotes	GH4	0.677547	123	0	0	0
Tongue dorsum	M00150	Complex_II__succinate_dehydrogenase___fumarate_reductase___fumarate_reductase	GH103	0.717726	123	0	0	0
Tongue dorsum	M00151	Complex_III__Cytochrome_bc1_complex_	GH65	0.868014	123	0	0	0
Tongue dorsum	M00156	Complex_IV__Cytochrome_c_oxidase___cytochrome_c_oxidase__cbb3-type	GH65	0.869956	123	0	0	0
Tongue dorsum	M00168	CAM__Crassulacean_acid_metabolism___dark	GH102	0.852696	123	0	0	0
Tongue dorsum	M00168	CAM__Crassulacean_acid_metabolism___dark	GH103	0.836957	123	0	0	0
Tongue dorsum	M00172	C4-dicarboxylic_acid_cycle__NADP__-malic_enzyme_type	GH97	0.808972	123	0	0	0
Tongue dorsum	M00172	C4-dicarboxylic_acid_cycle__NADP__-malic_enzyme_type	GH92	0.745702	123	0	0	0
Tongue dorsum	M00172	C4-dicarboxylic_acid_cycle__NADP__-malic_enzyme_type	GH110	0.729067	123	0	0	0
Tongue dorsum	M00172	C4-dicarboxylic_acid_cycle__NADP__-malic_enzyme_type	GH30	0.716375	123	0	0	0
Tongue dorsum	M00172	C4-dicarboxylic_acid_cycle__NADP__-malic_enzyme_type	GH16	0.709443	123	0	0	0
Tongue dorsum	M00175	Nitrogen_fixation__N2_=__ammonia	GH65	-0.668699	123	0	0	0
Tongue dorsum	M00178	Ribosome__bacteria	GH103	-0.672907	123	0	0	0
Tongue dorsum	M00178	Ribosome__bacteria	GH102	-0.696894	123	0	0	0
Tongue dorsum	M00185	Sulfate_transport_system	GH65	0.665725	123	0	0	0
Tongue dorsum	M00194	Maltose_maltodextrin_transport_system	GH1	0.759346	123	0	0	0
Tongue dorsum	M00194	Maltose_maltodextrin_transport_system	GH65	-0.741589	123	0	0	0
Tongue dorsum	M00197	Putative_sugar_transport_system	GH1	0.778816	123	0	0	0
Tongue dorsum	M00197	Putative_sugar_transport_system	GH8	0.665226	123	0	0	0
Tongue dorsum	M00197	Putative_sugar_transport_system	GH65	-0.737975	123	0	0	0
Tongue dorsum	M00198	sn-Glycerol_3-phosphate_transport_system	GH111	0.746182	123	0	0	0
Tongue dorsum	M00198	sn-Glycerol_3-phosphate_transport_system	GH42	0.726277	123	0	0	0
Tongue dorsum	M00199	Lactose_L-arabinose_transport_system	GH114	0.799588	123	0	0	0
Tongue dorsum	M00199	Lactose_L-arabinose_transport_system	GH4	0.724172	123	0	0	0
Tongue dorsum	M00199	Lactose_L-arabinose_transport_system	GH105	0.672888	123	0	0	0
Tongue dorsum	M00207	Multiple_sugar_transport_system	GH8	0.782306	123	0	0	0
Tongue dorsum	M00207	Multiple_sugar_transport_system	GH85	0.77798	123	0	0	0
Tongue dorsum	M00207	Multiple_sugar_transport_system	GH38	0.763025	123	0	0	0
Tongue dorsum	M00207	Multiple_sugar_transport_system	GH1	0.715138	123	0	0	0
Tongue dorsum	M00220	Rhamnose_transport_system	GH111	0.712827	123	0	0	0
Tongue dorsum	M00222	Phosphate_transport_system	GH8	0.724059	123	0	0	0
Tongue dorsum	M00222	Phosphate_transport_system	GH85	0.700219	123	0	0	0
Tongue dorsum	M00222	Phosphate_transport_system	GH1	0.673316	123	0	0	0
Tongue dorsum	M00222	Phosphate_transport_system	GH35	0.669696	123	0	0	0
Tongue dorsum	M00229	Arginine_transport_system	GH102	0.83032	123	0	0	0
Tongue dorsum	M00229	Arginine_transport_system	GH103	0.811323	123	0	0	0
Tongue dorsum	M00237	Branched-chain_amino_acid_transport_system	GH1	0.669872	123	0	0	0
Tongue dorsum	M00237	Branched-chain_amino_acid_transport_system	GH102	-0.770954	123	0	0	0
Tongue dorsum	M00237	Branched-chain_amino_acid_transport_system	GH65	-0.790282	123	0	0	0
Tongue dorsum	M00270	PTS_system__trehalose-specific_II_component	GH68	0.721162	123	0	0	0
Tongue dorsum	M00270	PTS_system__trehalose-specific_II_component	GH70	0.712464	123	0	0	0
Tongue dorsum	M00276	PTS_system__mannose-specific_II_component	GH35	0.746127	123	0	0	0
Tongue dorsum	M00276	PTS_system__mannose-specific_II_component	GH85	0.738549	123	0	0	0
Tongue dorsum	M00276	PTS_system__mannose-specific_II_component	GH1	0.721742	123	0	0	0
Tongue dorsum	M00276	PTS_system__mannose-specific_II_component	GH8	0.686944	123	0	0	0
Tongue dorsum	M00300	Putrescine_transport_system	GH65	0.95496	123	0	0	0
Tongue dorsum	M00304	PTS_system__fructose-specific_II_component	GH76	0.764845	123	0	0	0
Tongue dorsum	M00307	Pyruvate_oxidation__pyruvate_=__acetyl-CoA	GH76	0.671537	123	0	0	0
Tongue dorsum	M00307	Pyruvate_oxidation__pyruvate_=__acetyl-CoA	GH53	-0.693415	123	0	0	0
Tongue dorsum	M00307	Pyruvate_oxidation__pyruvate_=__acetyl-CoA	GH43	-0.705658	123	0	0	0
Tongue dorsum	M00307	Pyruvate_oxidation__pyruvate_=__acetyl-CoA	GH51	-0.708645	123	0	0	0
Tongue dorsum	M00307	Pyruvate_oxidation__pyruvate_=__acetyl-CoA	GH4	-0.729423	123	0	0	0
Tongue dorsum	M00307	Pyruvate_oxidation__pyruvate_=__acetyl-CoA	GH114	-0.729943	123	0	0	0
Tongue dorsum	M00307	Pyruvate_oxidation__pyruvate_=__acetyl-CoA	GH26	-0.732882	123	0	0	0
Tongue dorsum	M00307	Pyruvate_oxidation__pyruvate_=__acetyl-CoA	GH105	-0.733133	123	0	0	0
Tongue dorsum	M00307	Pyruvate_oxidation__pyruvate_=__acetyl-CoA	GH57	-0.733392	123	0	0	0
Tongue dorsum	M00307	Pyruvate_oxidation__pyruvate_=__acetyl-CoA	GH28	-0.735326	123	0	0	0
Tongue dorsum	M00310	Pyruvate_ferredoxin_oxidoreductase	GH26	0.686273	123	0	0	0
Tongue dorsum	M00310	Pyruvate_ferredoxin_oxidoreductase	GH4	0.681652	123	0	0	0
Tongue dorsum	M00311	2-oxoglutarate_ferredoxin_oxidoreductase	GH43	0.790978	123	0	0	0
Tongue dorsum	M00311	2-oxoglutarate_ferredoxin_oxidoreductase	GH5	0.764729	123	0	0	0
Tongue dorsum	M00311	2-oxoglutarate_ferredoxin_oxidoreductase	GH27	0.760423	123	0	0	0
Tongue dorsum	M00311	2-oxoglutarate_ferredoxin_oxidoreductase	GH28	0.749866	123	0	0	0
Tongue dorsum	M00311	2-oxoglutarate_ferredoxin_oxidoreductase	GH24	0.742847	123	0	0	0
Tongue dorsum	M00311	2-oxoglutarate_ferredoxin_oxidoreductase	GH105	0.733175	123	0	0	0
Tongue dorsum	M00311	2-oxoglutarate_ferredoxin_oxidoreductase	GH57	0.719159	123	0	0	0
Tongue dorsum	M00311	2-oxoglutarate_ferredoxin_oxidoreductase	GH51	0.717126	123	0	0	0
Tongue dorsum	M00311	2-oxoglutarate_ferredoxin_oxidoreductase	GH53	0.677494	123	0	0	0
Tongue dorsum	M00312	2-oxoisovalerate_ferredoxin_oxidoreductase	GH114	0.68984	123	0	0	0
Tongue dorsum	M00312	2-oxoisovalerate_ferredoxin_oxidoreductase	GH105	0.683939	123	0	0	0
Tongue dorsum	M00317	Manganese_iron_transport_system	GH102	0.760016	123	0	0	0
Tongue dorsum	M00317	Manganese_iron_transport_system	GH103	0.735823	123	0	0	0
Tongue dorsum	M00319	Manganese_zinc_iron_transport_system	GH4	0.770603	123	0	0	0
Tongue dorsum	M00319	Manganese_zinc_iron_transport_system	GH105	0.694183	123	0	0	0
Tongue dorsum	M00319	Manganese_zinc_iron_transport_system	GH28	0.69037	123	0	0	0
Tongue dorsum	M00319	Manganese_zinc_iron_transport_system	GH114	0.685089	123	0	0	0
Tongue dorsum	M00319	Manganese_zinc_iron_transport_system	GH51	0.677728	123	0	0	0
Tongue dorsum	M00319	Manganese_zinc_iron_transport_system	GH57	0.665544	123	0	0	0
Tongue dorsum	M00324	Dipeptide_transport_system	GH102	0.831258	123	0	0	0
Tongue dorsum	M00324	Dipeptide_transport_system	GH103	0.811839	123	0	0	0
Tongue dorsum	M00326	RTX_toxin_transport_system	GH114	0.721377	123	0	0	0
Tongue dorsum	M00346	Formaldehyde_assimilation__serine_pathway	GH51	0.775395	123	0	0	0
Tongue dorsum	M00346	Formaldehyde_assimilation__serine_pathway	GH105	0.751694	123	0	0	0
Tongue dorsum	M00346	Formaldehyde_assimilation__serine_pathway	GH43	0.730779	123	0	0	0
Tongue dorsum	M00346	Formaldehyde_assimilation__serine_pathway	GH26	0.714069	123	0	0	0
Tongue dorsum	M00346	Formaldehyde_assimilation__serine_pathway	GH57	0.711869	123	0	0	0
Tongue dorsum	M00346	Formaldehyde_assimilation__serine_pathway	GH53	0.696726	123	0	0	0
Tongue dorsum	M00346	Formaldehyde_assimilation__serine_pathway	GH24	0.674	123	0	0	0
Tongue dorsum	M00348	Glutathione_transport_system	GH4	0.827923	123	0	0	0
Tongue dorsum	M00349	Microcin_C_transport_system	GH65	0.948292	123	0	0	0
Tongue dorsum	M00359	Aminoacyl-tRNA_biosynthesis__eukaryotes	GH57	0.809325	123	0	0	0
Tongue dorsum	M00359	Aminoacyl-tRNA_biosynthesis__eukaryotes	GH27	0.670288	123	0	0	0
Tongue dorsum	M00359	Aminoacyl-tRNA_biosynthesis__eukaryotes	GH16	0.664373	123	0	0	0
Buccal mucosa	M00061	Uronic_acid_metabolism	GH78	0.693996	109	1.11022e-16	1.33227e-14	2.67315e-14
Buccal mucosa	M00124	Pyridoxal_biosynthesis__erythrose-4P_=__pyridoxal-5P	GH97	0.690714	109	1.11022e-16	1.33227e-14	2.67005e-14
Buccal mucosa	M00124	Pyridoxal_biosynthesis__erythrose-4P_=__pyridoxal-5P	GH27	0.688244	109	1.11022e-16	1.33227e-14	2.66695e-14
Buccal mucosa	M00304	PTS_system__fructose-specific_II_component	GH76	0.687265	109	1.11022e-16	1.33227e-14	2.66386e-14
Stool	M00004	Pentose_phosphate_pathway__Pentose_phosphate_cycle_	PL12	0.637511	136	1.11022e-16	1.33227e-14	2.66078e-14
Stool	M00004	Pentose_phosphate_pathway__Pentose_phosphate_cycle_	GH28	0.637441	136	1.11022e-16	1.33227e-14	2.6577e-14
Stool	M00006	Pentose_phosphate_pathway__oxidative_phase__glucose_6P_=__ribulose_5P	GH95	0.635802	136	1.11022e-16	1.33227e-14	2.65463e-14
Stool	M00006	Pentose_phosphate_pathway__oxidative_phase__glucose_6P_=__ribulose_5P	GH16	0.633493	136	1.11022e-16	1.33227e-14	2.65157e-14
Stool	M00008	Entner-Doudoroff_pathway__glucose-6P_=__glyceraldehyde-3P___pyruvate	GH97	0.636347	136	1.11022e-16	1.33227e-14	2.64851e-14
Stool	M00015	Proline_biosynthesis__glutamate_=__proline	GH33	0.635414	136	1.11022e-16	1.33227e-14	2.64547e-14
Stool	M00015	Proline_biosynthesis__glutamate_=__proline	GH11	-0.637478	136	1.11022e-16	1.33227e-14	2.64243e-14
Stool	M00016	Lysine_biosynthesis__aspartate_=__lysine	PL1	-0.633052	136	1.11022e-16	1.33227e-14	2.63939e-14
Stool	M00018	Threonine_biosynthesis__apartate_=__homoserine_=__threonine	GH2	-0.63333	136	1.11022e-16	1.33227e-14	2.63637e-14
Stool	M00018	Threonine_biosynthesis__apartate_=__homoserine_=__threonine	GH97	-0.638736	136	1.11022e-16	1.33227e-14	2.63335e-14
Stool	M00022	Shikimate_pathway__phosphoenolpyruvate___erythrose-4P_=__chorismate	GH35	-0.63612	136	1.11022e-16	1.33227e-14	2.63033e-14
Stool	M00022	Shikimate_pathway__phosphoenolpyruvate___erythrose-4P_=__chorismate	GH33	-0.638996	136	1.11022e-16	1.33227e-14	2.62733e-14
Stool	M00045	Histidine_degradation__histidine_=__N-formiminoglutamate_=__glutamate	GH42	0.638829	136	1.11022e-16	1.33227e-14	2.62433e-14
Stool	M00045	Histidine_degradation__histidine_=__N-formiminoglutamate_=__glutamate	PL10	0.635354	136	1.11022e-16	1.33227e-14	2.62133e-14
Stool	M00045	Histidine_degradation__histidine_=__N-formiminoglutamate_=__glutamate	GH33	0.633384	136	1.11022e-16	1.33227e-14	2.61835e-14
Stool	M00052	Pyrimidine_ribonucleotide_biosynthesis__UMP_=__UDP_UTP_CDP_CTP	GH78	0.632789	136	1.11022e-16	1.33227e-14	2.61537e-14
Stool	M00052	Pyrimidine_ribonucleotide_biosynthesis__UMP_=__UDP_UTP_CDP_CTP	GH112	-0.632123	136	1.11022e-16	1.33227e-14	2.6124e-14
Stool	M00060	Lipopolysaccharide_biosynthesis__KDO2-lipid_A	PL11	0.636291	136	1.11022e-16	1.33227e-14	2.60943e-14
Stool	M00060	Lipopolysaccharide_biosynthesis__KDO2-lipid_A	GH88	0.635768	136	1.11022e-16	1.33227e-14	2.60647e-14
Stool	M00060	Lipopolysaccharide_biosynthesis__KDO2-lipid_A	GH20	0.632691	136	1.11022e-16	1.33227e-14	2.60352e-14
Stool	M00077	Chondroitin_sulfate_degradation	GH43	0.635819	136	1.11022e-16	1.33227e-14	2.60058e-14
Stool	M00077	Chondroitin_sulfate_degradation	GH28	0.635553	136	1.11022e-16	1.33227e-14	2.59764e-14
Stool	M00079	Keratan_sulfate_degradation	PL11	0.635931	136	1.11022e-16	1.33227e-14	2.59471e-14
Stool	M00087	beta-Oxidation	GH88	-0.632281	136	1.11022e-16	1.33227e-14	2.59178e-14
Stool	M00087	beta-Oxidation	GH2	-0.638672	136	1.11022e-16	1.33227e-14	2.58886e-14
Stool	M00098	Acylglycerol_degradation	GH15	-0.637632	136	1.11022e-16	1.33227e-14	2.58595e-14
Stool	M00119	Pantothenate_biosynthesis__valine_L-aspartate_=__pantothenate	GH33	0.635606	136	1.11022e-16	1.33227e-14	2.58305e-14
Stool	M00123	Biotin_biosynthesis__pimeloyl-CoA_=__biotin	GH76	0.635115	136	1.11022e-16	1.33227e-14	2.58015e-14
Stool	M00124	Pyridoxal_biosynthesis__erythrose-4P_=__pyridoxal-5P	PL11	0.635352	136	1.11022e-16	1.33227e-14	2.57725e-14
Stool	M00124	Pyridoxal_biosynthesis__erythrose-4P_=__pyridoxal-5P	GH3	0.632595	136	1.11022e-16	1.33227e-14	2.57437e-14
Stool	M00125	Riboflavin_biosynthesis__GTP_=__riboflavin_FMN_FAD	GH57	0.638026	136	1.11022e-16	1.33227e-14	2.57149e-14
Stool	M00125	Riboflavin_biosynthesis__GTP_=__riboflavin_FMN_FAD	GH112	-0.635848	136	1.11022e-16	1.33227e-14	2.56861e-14
Stool	M00126	Tetrahydrofolate_biosynthesis__GTP_=__THF	GH43	0.637607	136	1.11022e-16	1.33227e-14	2.56575e-14
Stool	M00126	Tetrahydrofolate_biosynthesis__GTP_=__THF	PL12	0.635258	136	1.11022e-16	1.33227e-14	2.56289e-14
Stool	M00126	Tetrahydrofolate_biosynthesis__GTP_=__THF	PL15	0.634063	136	1.11022e-16	1.33227e-14	2.56003e-14
Stool	M00126	Tetrahydrofolate_biosynthesis__GTP_=__THF	GH95	0.633521	136	1.11022e-16	1.33227e-14	2.55719e-14
Stool	M00144	Complex_I__NADH_dehydrogenase___NADH_dehydrogenase_I	PL8	0.63714	136	1.11022e-16	1.33227e-14	2.55434e-14
Stool	M00144	Complex_I__NADH_dehydrogenase___NADH_dehydrogenase_I	GH20	0.636497	136	1.11022e-16	1.33227e-14	2.55151e-14
Stool	M00144	Complex_I__NADH_dehydrogenase___NADH_dehydrogenase_I	GH92	0.633125	136	1.11022e-16	1.33227e-14	2.54868e-14
Stool	M00175	Nitrogen_fixation__N2_=__ammonia	GH94	0.633688	136	1.11022e-16	1.33227e-14	2.54586e-14
Stool	M00178	Ribosome__bacteria	PL11	-0.63761	136	1.11022e-16	1.33227e-14	2.54304e-14
Stool	M00183	RNA_polymerase__bacteria	GH20	-0.633525	136	1.11022e-16	1.33227e-14	2.54023e-14
Stool	M00183	RNA_polymerase__bacteria	GH33	-0.634598	136	1.11022e-16	1.33227e-14	2.53743e-14
Stool	M00183	RNA_polymerase__bacteria	GH88	-0.636514	136	1.11022e-16	1.33227e-14	2.53463e-14
Stool	M00193	Putative_spermidine_putrescine_transport_system	GH94	0.636247	136	1.11022e-16	1.33227e-14	2.53184e-14
Stool	M00202	Oligogalacturonide_transport_system	GH105	-0.634784	136	1.11022e-16	1.33227e-14	2.52905e-14
Stool	M00207	Multiple_sugar_transport_system	GH113	0.634875	136	1.11022e-16	1.33227e-14	2.52628e-14
Stool	M00237	Branched-chain_amino_acid_transport_system	GH15	-0.633038	136	1.11022e-16	1.33227e-14	2.5235e-14
Stool	M00237	Branched-chain_amino_acid_transport_system	GH16	-0.633645	136	1.11022e-16	1.33227e-14	2.52074e-14
Stool	M00237	Branched-chain_amino_acid_transport_system	GH29	-0.635433	136	1.11022e-16	1.33227e-14	2.51797e-14
Stool	M00237	Branched-chain_amino_acid_transport_system	PL8	-0.636874	136	1.11022e-16	1.33227e-14	2.51522e-14
Stool	M00245	Cobalt_transport_system	GH1	0.633999	136	1.11022e-16	1.33227e-14	2.51247e-14
Stool	M00270	PTS_system__trehalose-specific_II_component	GH43	-0.634544	136	1.11022e-16	1.33227e-14	2.50973e-14
Stool	M00270	PTS_system__trehalose-specific_II_component	GH28	-0.637259	136	1.11022e-16	1.33227e-14	2.50699e-14
Stool	M00300	Putrescine_transport_system	GH94	0.638696	136	1.11022e-16	1.33227e-14	2.50426e-14
Stool	M00300	Putrescine_transport_system	GH109	-0.635475	136	1.11022e-16	1.33227e-14	2.50153e-14
Stool	M00359	Aminoacyl-tRNA_biosynthesis__eukaryotes	GH33	-0.634579	136	1.11022e-16	1.33227e-14	2.49882e-14
Stool	M00359	Aminoacyl-tRNA_biosynthesis__eukaryotes	PL11	-0.636913	136	1.11022e-16	1.33227e-14	2.4961e-14
Stool	M00361	Nucleotide_sugar_biosynthesis__eukaryotes	GH43	-0.636442	136	1.11022e-16	1.33227e-14	2.4934e-14
Stool	M00361	Nucleotide_sugar_biosynthesis__eukaryotes	GH97	-0.636662	136	1.11022e-16	1.33227e-14	2.49069e-14
Stool	M00361	Nucleotide_sugar_biosynthesis__eukaryotes	GH2	-0.636995	136	1.11022e-16	1.33227e-14	2.488e-14
Stool	M00361	Nucleotide_sugar_biosynthesis__eukaryotes	GH105	-0.637643	136	1.11022e-16	1.33227e-14	2.48531e-14
Supragingival plaque	M00001	Glycolysis__Embden-Meyerhof_pathway___glucose_=__pyruvate	GH103	-0.678294	115	1.11022e-16	1.33227e-14	2.48262e-14
Supragingival plaque	M00004	Pentose_phosphate_pathway__Pentose_phosphate_cycle_	GH51	-0.676241	115	1.11022e-16	1.33227e-14	2.47995e-14
Supragingival plaque	M00004	Pentose_phosphate_pathway__Pentose_phosphate_cycle_	GH97	-0.677114	115	1.11022e-16	1.33227e-14	2.47727e-14
Supragingival plaque	M00004	Pentose_phosphate_pathway__Pentose_phosphate_cycle_	GH4	-0.67855	115	1.11022e-16	1.33227e-14	2.47461e-14
Supragingival plaque	M00023	Tryptophan_biosynthesis__chorismate_=__tryptophan	GH26	-0.680064	115	1.11022e-16	1.33227e-14	2.47195e-14
Supragingival plaque	M00036	Leucine_degradation__leucine_=__acetoacetate___acetyl-CoA	GH51	0.6764	115	1.11022e-16	1.33227e-14	2.46929e-14
Supragingival plaque	M00060	Lipopolysaccharide_biosynthesis__KDO2-lipid_A	GH5	0.674203	115	1.11022e-16	1.33227e-14	2.46664e-14
Supragingival plaque	M00061	Uronic_acid_metabolism	GH67	0.679657	115	1.11022e-16	1.33227e-14	2.464e-14
Supragingival plaque	M00077	Chondroitin_sulfate_degradation	GH51	0.6802	115	1.11022e-16	1.33227e-14	2.46136e-14
Supragingival plaque	M00079	Keratan_sulfate_degradation	GH88	0.677034	115	1.11022e-16	1.33227e-14	2.45873e-14
Supragingival plaque	M00119	Pantothenate_biosynthesis__valine_L-aspartate_=__pantothenate	GH15	0.678376	115	1.11022e-16	1.33227e-14	2.4561e-14
Supragingival plaque	M00126	Tetrahydrofolate_biosynthesis__GTP_=__THF	GH18	0.679951	115	1.11022e-16	1.33227e-14	2.45348e-14
Supragingival plaque	M00133	Polyamine_biosynthesis__arginine_=__agmatine_=__putrescine_=__spermidine	GH89	0.675075	115	1.11022e-16	1.33227e-14	2.45086e-14
Supragingival plaque	M00202	Oligogalacturonide_transport_system	GH88	0.679285	115	1.11022e-16	1.33227e-14	2.44825e-14
Supragingival plaque	M00222	Phosphate_transport_system	GH43	-0.673991	115	1.11022e-16	1.33227e-14	2.44565e-14
Supragingival plaque	M00278	PTS_system__sorbose-specific_II_component	GH51	0.673625	115	1.11022e-16	1.33227e-14	2.44305e-14
Supragingival plaque	M00307	Pyruvate_oxidation__pyruvate_=__acetyl-CoA	GH78	-0.680057	115	1.11022e-16	1.33227e-14	2.44046e-14
Tongue dorsum	M00021	Cysteine_biosynthesis__serine_=__cysteine	GH1	0.657764	123	1.11022e-16	1.33227e-14	2.43787e-14
Tongue dorsum	M00048	Inosine_monophosphate_biosynthesis__PRPP___glutamine_=__IMP	GH35	0.657125	123	1.11022e-16	1.33227e-14	2.43529e-14
Tongue dorsum	M00049	Adenine_nucleotide_biosynthesis__IMP_=__ADP_dADP_ATP_dATP	GH43	0.66169	123	1.11022e-16	1.33227e-14	2.43271e-14
Tongue dorsum	M00079	Keratan_sulfate_degradation	GH24	0.659317	123	1.11022e-16	1.33227e-14	2.43014e-14
Tongue dorsum	M00125	Riboflavin_biosynthesis__GTP_=__riboflavin_FMN_FAD	GH57	0.656845	123	1.11022e-16	1.33227e-14	2.42757e-14
Tongue dorsum	M00125	Riboflavin_biosynthesis__GTP_=__riboflavin_FMN_FAD	GH1	-0.658227	123	1.11022e-16	1.33227e-14	2.42501e-14
Tongue dorsum	M00133	Polyamine_biosynthesis__arginine_=__agmatine_=__putrescine_=__spermidine	GH57	0.657489	123	1.11022e-16	1.33227e-14	2.42246e-14
Tongue dorsum	M00141	C1-unit_interconversion__eukaryotes	GH42	0.66022	123	1.11022e-16	1.33227e-14	2.41991e-14
Tongue dorsum	M00157	F-type_ATPase__bacteria	GH65	-0.658755	123	1.11022e-16	1.33227e-14	2.41736e-14
Tongue dorsum	M00164	ATP_synthase	GH65	-0.658755	123	1.11022e-16	1.33227e-14	2.41482e-14
Tongue dorsum	M00194	Maltose_maltodextrin_transport_system	GH8	0.658206	123	1.11022e-16	1.33227e-14	2.41229e-14
Tongue dorsum	M00197	Putative_sugar_transport_system	GH68	0.656869	123	1.11022e-16	1.33227e-14	2.40976e-14
Tongue dorsum	M00199	Lactose_L-arabinose_transport_system	GH28	0.657501	123	1.11022e-16	1.33227e-14	2.40724e-14
Tongue dorsum	M00220	Rhamnose_transport_system	GH42	0.658894	123	1.11022e-16	1.33227e-14	2.40472e-14
Tongue dorsum	M00222	Phosphate_transport_system	GH70	0.66258	123	1.11022e-16	1.33227e-14	2.40221e-14
Tongue dorsum	M00222	Phosphate_transport_system	GH38	0.661082	123	1.11022e-16	1.33227e-14	2.3997e-14
Tongue dorsum	M00270	PTS_system__trehalose-specific_II_component	GH103	-0.661132	123	1.11022e-16	1.33227e-14	2.3972e-14
Tongue dorsum	M00287	PTS_system__galactosamine-specific_II_component	GH112	0.661694	123	1.11022e-16	1.33227e-14	2.3947e-14
Tongue dorsum	M00310	Pyruvate_ferredoxin_oxidoreductase	GH57	0.659244	123	1.11022e-16	1.33227e-14	2.39221e-14
Tongue dorsum	M00359	Aminoacyl-tRNA_biosynthesis__eukaryotes	GH4	0.662886	123	1.11022e-16	1.33227e-14	2.38972e-14
Tongue dorsum	M00360	Aminoacyl-tRNA_biosynthesis__prokaryotes	GH102	-0.659	123	1.11022e-16	1.33227e-14	2.38724e-14
Tongue dorsum	M00366	C10-C20_isoprenoid_biosynthesis__plants	GH110	0.657978	123	1.11022e-16	1.33227e-14	2.38476e-14
Stool	M00004	Pentose_phosphate_pathway__Pentose_phosphate_cycle_	GH97	0.63027	136	2.22045e-16	2.66454e-14	4.7646e-14
Stool	M00008	Entner-Doudoroff_pathway__glucose-6P_=__glyceraldehyde-3P___pyruvate	GH27	0.630236	136	2.22045e-16	2.66454e-14	4.75967e-14
Stool	M00018	Threonine_biosynthesis__apartate_=__homoserine_=__threonine	GH43	-0.628219	136	2.22045e-16	2.66454e-14	4.75475e-14
Stool	M00022	Shikimate_pathway__phosphoenolpyruvate___erythrose-4P_=__chorismate	GH115	-0.629918	136	2.22045e-16	2.66454e-14	4.74984e-14
Stool	M00026	Histidine_biosynthesis__PRPP_=__histidine	GH92	-0.629115	136	2.22045e-16	2.66454e-14	4.74493e-14
Stool	M00076	Dermatan_sulfate_degradation	GH88	0.628244	136	2.22045e-16	2.66454e-14	4.74004e-14
Stool	M00087	beta-Oxidation	GH20	-0.629724	136	2.22045e-16	2.66454e-14	4.73516e-14
Stool	M00098	Acylglycerol_degradation	GH30	-0.630039	136	2.22045e-16	2.66454e-14	4.73029e-14
Stool	M00123	Biotin_biosynthesis__pimeloyl-CoA_=__biotin	GH16	0.629894	136	2.22045e-16	2.66454e-14	4.72543e-14
Stool	M00123	Biotin_biosynthesis__pimeloyl-CoA_=__biotin	GH62	0.629827	136	2.22045e-16	2.66454e-14	4.72058e-14
Stool	M00124	Pyridoxal_biosynthesis__erythrose-4P_=__pyridoxal-5P	GH42	0.630119	136	2.22045e-16	2.66454e-14	4.71573e-14
Stool	M00126	Tetrahydrofolate_biosynthesis__GTP_=__THF	GH115	0.628504	136	2.22045e-16	2.66454e-14	4.7109e-14
Stool	M00126	Tetrahydrofolate_biosynthesis__GTP_=__THF	GH35	0.628155	136	2.22045e-16	2.66454e-14	4.70608e-14
Stool	M00126	Tetrahydrofolate_biosynthesis__GTP_=__THF	GH111	-0.62957	136	2.22045e-16	2.66454e-14	4.70127e-14
Stool	M00150	Complex_II__succinate_dehydrogenase___fumarate_reductase___fumarate_reductase	GH103	0.62855	136	2.22045e-16	2.66454e-14	4.69647e-14
Stool	M00159	V-type_ATPase__prokaryotes	GH4	0.630954	136	2.22045e-16	2.66454e-14	4.69167e-14
Stool	M00183	RNA_polymerase__bacteria	GH92	-0.630696	136	2.22045e-16	2.66454e-14	4.68689e-14
Stool	M00185	Sulfate_transport_system	GH4	0.62926	136	2.22045e-16	2.66454e-14	4.68212e-14
Stool	M00193	Putative_spermidine_putrescine_transport_system	GH106	-0.629898	136	2.22045e-16	2.66454e-14	4.67736e-14
Stool	M00197	Putative_sugar_transport_system	GH111	0.628041	136	2.22045e-16	2.66454e-14	4.6726e-14
Stool	M00198	sn-Glycerol_3-phosphate_transport_system	GH89	-0.629799	136	2.22045e-16	2.66454e-14	4.66786e-14
Stool	M00198	sn-Glycerol_3-phosphate_transport_system	PL11	-0.630762	136	2.22045e-16	2.66454e-14	4.66313e-14
Stool	M00199	Lactose_L-arabinose_transport_system	GH113	0.62932	136	2.22045e-16	2.66454e-14	4.6584e-14
Stool	M00207	Multiple_sugar_transport_system	PL1	-0.629683	136	2.22045e-16	2.66454e-14	4.65369e-14
Stool	M00239	Peptides_nickel_transport_system	GH94	0.630126	136	2.22045e-16	2.66454e-14	4.64898e-14
Stool	M00239	Peptides_nickel_transport_system	GH33	-0.630637	136	2.22045e-16	2.66454e-14	4.64428e-14
Stool	M00239	Peptides_nickel_transport_system	GH78	-0.63093	136	2.22045e-16	2.66454e-14	4.6396e-14
Stool	M00311	2-oxoglutarate_ferredoxin_oxidoreductase	GH113	-0.630849	136	2.22045e-16	2.66454e-14	4.63492e-14
Stool	M00360	Aminoacyl-tRNA_biosynthesis__prokaryotes	PL11	-0.63112	136	2.22045e-16	2.66454e-14	4.63025e-14
Stool	M00361	Nucleotide_sugar_biosynthesis__eukaryotes	PL1	-0.630149	136	2.22045e-16	2.66454e-14	4.62559e-14
Stool	M00362	Nucleotide_sugar_biosynthesis__prokaryotes	GH94	0.62815	136	2.22045e-16	2.66454e-14	4.62095e-14
Supragingival plaque	M00006	Pentose_phosphate_pathway__oxidative_phase__glucose_6P_=__ribulose_5P	GH6	-0.670098	115	2.22045e-16	2.66454e-14	4.61631e-14
Supragingival plaque	M00006	Pentose_phosphate_pathway__oxidative_phase__glucose_6P_=__ribulose_5P	GH16	-0.671558	115	2.22045e-16	2.66454e-14	4.61168e-14
Supragingival plaque	M00060	Lipopolysaccharide_biosynthesis__KDO2-lipid_A	GH18	0.672542	115	2.22045e-16	2.66454e-14	4.60706e-14
Supragingival plaque	M00079	Keratan_sulfate_degradation	GH116	0.670284	115	2.22045e-16	2.66454e-14	4.60244e-14
Supragingival plaque	M00133	Polyamine_biosynthesis__arginine_=__agmatine_=__putrescine_=__spermidine	GH110	0.671552	115	2.22045e-16	2.66454e-14	4.59784e-14
Supragingival plaque	M00178	Ribosome__bacteria	GH102	-0.670926	115	2.22045e-16	2.66454e-14	4.59325e-14
Supragingival plaque	M00222	Phosphate_transport_system	GH89	-0.670909	115	2.22045e-16	2.66454e-14	4.58866e-14
Supragingival plaque	M00222	Phosphate_transport_system	GH105	-0.671104	115	2.22045e-16	2.66454e-14	4.58409e-14
Supragingival plaque	M00278	PTS_system__sorbose-specific_II_component	GH43	0.672639	115	2.22045e-16	2.66454e-14	4.57952e-14
Supragingival plaque	M00307	Pyruvate_oxidation__pyruvate_=__acetyl-CoA	GH114	-0.669854	115	2.22045e-16	2.66454e-14	4.57497e-14
Supragingival plaque	M00307	Pyruvate_oxidation__pyruvate_=__acetyl-CoA	GH24	-0.671487	115	2.22045e-16	2.66454e-14	4.57042e-14
Supragingival plaque	M00311	2-oxoglutarate_ferredoxin_oxidoreductase	GH26	0.67245	115	2.22045e-16	2.66454e-14	4.56588e-14
Supragingival plaque	M00359	Aminoacyl-tRNA_biosynthesis__eukaryotes	GH28	0.672331	115	2.22045e-16	2.66454e-14	4.56135e-14
Supragingival plaque	M00360	Aminoacyl-tRNA_biosynthesis__prokaryotes	GH63	0.672547	115	2.22045e-16	2.66454e-14	4.55683e-14
Tongue dorsum	M00004	Pentose_phosphate_pathway__Pentose_phosphate_cycle_	GH53	-0.653658	123	2.22045e-16	2.66454e-14	4.55232e-14
Tongue dorsum	M00018	Threonine_biosynthesis__apartate_=__homoserine_=__threonine	GH1	0.656268	123	2.22045e-16	2.66454e-14	4.54782e-14
Tongue dorsum	M00023	Tryptophan_biosynthesis__chorismate_=__tryptophan	GH97	-0.655972	123	2.22045e-16	2.66454e-14	4.54332e-14
Tongue dorsum	M00023	Tryptophan_biosynthesis__chorismate_=__tryptophan	GH16	-0.656297	123	2.22045e-16	2.66454e-14	4.53884e-14
Tongue dorsum	M00048	Inosine_monophosphate_biosynthesis__PRPP___glutamine_=__IMP	GH85	0.653991	123	2.22045e-16	2.66454e-14	4.53436e-14
Tongue dorsum	M00049	Adenine_nucleotide_biosynthesis__IMP_=__ADP_dADP_ATP_dATP	GH51	0.653454	123	2.22045e-16	2.66454e-14	4.52989e-14
Tongue dorsum	M00076	Dermatan_sulfate_degradation	GH5	0.653437	123	2.22045e-16	2.66454e-14	4.52543e-14
Tongue dorsum	M00307	Pyruvate_oxidation__pyruvate_=__acetyl-CoA	GH5	-0.656064	123	2.22045e-16	2.66454e-14	4.52098e-14
Tongue dorsum	M00312	2-oxoisovalerate_ferredoxin_oxidoreductase	GH28	0.656348	123	2.22045e-16	2.66454e-14	4.51654e-14
Tongue dorsum	M00324	Dipeptide_transport_system	GH110	0.654206	123	2.22045e-16	2.66454e-14	4.51211e-14
Tongue dorsum	M00336	Twin-arginine_translocation__Tat__system	GH102	0.653453	123	2.22045e-16	2.66454e-14	4.50769e-14
Buccal mucosa	M00324	Dipeptide_transport_system	GH102	0.682183	109	3.33067e-16	3.9968e-14	6.7549e-14
Stool	M00018	Threonine_biosynthesis__apartate_=__homoserine_=__threonine	PL11	-0.627232	136	3.33067e-16	3.9968e-14	6.74829e-14
Stool	M00022	Shikimate_pathway__phosphoenolpyruvate___erythrose-4P_=__chorismate	GH113	0.626154	136	3.33067e-16	3.9968e-14	6.74169e-14
Stool	M00045	Histidine_degradation__histidine_=__N-formiminoglutamate_=__glutamate	GH2	0.627507	136	3.33067e-16	3.9968e-14	6.73511e-14
Stool	M00060	Lipopolysaccharide_biosynthesis__KDO2-lipid_A	GH89	0.627386	136	3.33067e-16	3.9968e-14	6.72854e-14
Stool	M00060	Lipopolysaccharide_biosynthesis__KDO2-lipid_A	GH67	0.626573	136	3.33067e-16	3.9968e-14	6.72198e-14
Stool	M00061	Uronic_acid_metabolism	GH105	0.627613	136	3.33067e-16	3.9968e-14	6.71544e-14
Stool	M00098	Acylglycerol_degradation	GH67	-0.626906	136	3.33067e-16	3.9968e-14	6.7089e-14
Stool	M00098	Acylglycerol_degradation	GH27	-0.627007	136	3.33067e-16	3.9968e-14	6.70238e-14
Stool	M00159	V-type_ATPase__prokaryotes	GH112	0.62683	136	3.33067e-16	3.9968e-14	6.69588e-14
Stool	M00175	Nitrogen_fixation__N2_=__ammonia	GH88	-0.627837	136	3.33067e-16	3.9968e-14	6.68938e-14
Stool	M00178	Ribosome__bacteria	GH35	-0.625753	136	3.33067e-16	3.9968e-14	6.6829e-14
Stool	M00193	Putative_spermidine_putrescine_transport_system	GH115	-0.627474	136	3.33067e-16	3.9968e-14	6.67643e-14
Stool	M00193	Putative_spermidine_putrescine_transport_system	PL1	-0.627697	136	3.33067e-16	3.9968e-14	6.66997e-14
Stool	M00198	sn-Glycerol_3-phosphate_transport_system	GH88	-0.627173	136	3.33067e-16	3.9968e-14	6.66353e-14
Stool	M00202	Oligogalacturonide_transport_system	GH89	-0.627146	136	3.33067e-16	3.9968e-14	6.6571e-14
Stool	M00207	Multiple_sugar_transport_system	GH78	-0.626098	136	3.33067e-16	3.9968e-14	6.65068e-14
Stool	M00237	Branched-chain_amino_acid_transport_system	GH31	-0.626352	136	3.33067e-16	3.9968e-14	6.64427e-14
Stool	M00237	Branched-chain_amino_acid_transport_system	PL10	-0.626838	136	3.33067e-16	3.9968e-14	6.63787e-14
Stool	M00311	2-oxoglutarate_ferredoxin_oxidoreductase	GH94	-0.627066	136	3.33067e-16	3.9968e-14	6.63149e-14
Stool	M00324	Dipeptide_transport_system	GH97	-0.627516	136	3.33067e-16	3.9968e-14	6.62512e-14
Stool	M00345	Formaldehyde_assimilation__ribulose_monophosphate__pathway	GH4	0.627527	136	3.33067e-16	3.9968e-14	6.61876e-14
Stool	M00359	Aminoacyl-tRNA_biosynthesis__eukaryotes	GH78	-0.627062	136	3.33067e-16	3.9968e-14	6.61242e-14
Stool	M00360	Aminoacyl-tRNA_biosynthesis__prokaryotes	GH33	-0.626425	136	3.33067e-16	3.9968e-14	6.60608e-14
Supragingival plaque	M00004	Pentose_phosphate_pathway__Pentose_phosphate_cycle_	GH24	-0.667909	115	3.33067e-16	3.9968e-14	6.59976e-14
Supragingival plaque	M00060	Lipopolysaccharide_biosynthesis__KDO2-lipid_A	GH24	0.66874	115	3.33067e-16	3.9968e-14	6.59345e-14
Supragingival plaque	M00233	Glutamate_transport_system	GH57	-0.668167	115	3.33067e-16	3.9968e-14	6.58716e-14
Supragingival plaque	M00276	PTS_system__mannose-specific_II_component	GH110	-0.668075	115	3.33067e-16	3.9968e-14	6.58087e-14
Supragingival plaque	M00276	PTS_system__mannose-specific_II_component	GH5	-0.668577	115	3.33067e-16	3.9968e-14	6.5746e-14
Supragingival plaque	M00311	2-oxoglutarate_ferredoxin_oxidoreductase	GH109	0.668947	115	3.33067e-16	3.9968e-14	6.56834e-14
Supragingival plaque	M00360	Aminoacyl-tRNA_biosynthesis__prokaryotes	GH106	0.66837	115	3.33067e-16	3.9968e-14	6.56209e-14
Tongue dorsum	M00021	Cysteine_biosynthesis__serine_=__cysteine	GH85	0.651867	123	3.33067e-16	3.9968e-14	6.55585e-14
Tongue dorsum	M00023	Tryptophan_biosynthesis__chorismate_=__tryptophan	GH30	-0.651855	123	3.33067e-16	3.9968e-14	6.54962e-14
Tongue dorsum	M00076	Dermatan_sulfate_degradation	GH27	0.652322	123	3.33067e-16	3.9968e-14	6.54341e-14
Tongue dorsum	M00141	C1-unit_interconversion__eukaryotes	GH28	0.651	123	3.33067e-16	3.9968e-14	6.53721e-14
Stool	M00008	Entner-Doudoroff_pathway__glucose-6P_=__glyceraldehyde-3P___pyruvate	GH112	-0.625238	136	4.44089e-16	5.32907e-14	8.70801e-14
Stool	M00015	Proline_biosynthesis__glutamate_=__proline	GH2	0.625049	136	4.44089e-16	5.32907e-14	8.69977e-14
Stool	M00022	Shikimate_pathway__phosphoenolpyruvate___erythrose-4P_=__chorismate	PL11	-0.623833	136	4.44089e-16	5.32907e-14	8.69155e-14
Stool	M00022	Shikimate_pathway__phosphoenolpyruvate___erythrose-4P_=__chorismate	GH78	-0.625454	136	4.44089e-16	5.32907e-14	8.68334e-14
Stool	M00028	Ornithine_biosynthesis__glutamate_=__ornithine	GH94	0.62378	136	4.44089e-16	5.32907e-14	8.67515e-14
Stool	M00079	Keratan_sulfate_degradation	GH115	0.625121	136	4.44089e-16	5.32907e-14	8.66698e-14
Stool	M00087	beta-Oxidation	GH89	-0.625546	136	4.44089e-16	5.32907e-14	8.65882e-14
Stool	M00123	Biotin_biosynthesis__pimeloyl-CoA_=__biotin	PL12	0.624766	136	4.44089e-16	5.32907e-14	8.65067e-14
Stool	M00124	Pyridoxal_biosynthesis__erythrose-4P_=__pyridoxal-5P	GH27	0.623975	136	4.44089e-16	5.32907e-14	8.64254e-14
Stool	M00125	Riboflavin_biosynthesis__GTP_=__riboflavin_FMN_FAD	GH59	-0.62423	136	4.44089e-16	5.32907e-14	8.63442e-14
Stool	M00127	Thiamine_biosynthesis__AIR_=__thiamine-P_thiamine-2P	GH112	0.624405	136	4.44089e-16	5.32907e-14	8.62632e-14
Stool	M00183	RNA_polymerase__bacteria	GH97	-0.623882	136	4.44089e-16	5.32907e-14	8.61824e-14
Stool	M00193	Putative_spermidine_putrescine_transport_system	GH28	-0.623863	136	4.44089e-16	5.32907e-14	8.61017e-14
Stool	M00197	Putative_sugar_transport_system	GH106	-0.623827	136	4.44089e-16	5.32907e-14	8.60212e-14
Stool	M00197	Putative_sugar_transport_system	GH92	-0.62511	136	4.44089e-16	5.32907e-14	8.59408e-14
Stool	M00207	Multiple_sugar_transport_system	GH33	-0.625047	136	4.44089e-16	5.32907e-14	8.58605e-14
Stool	M00233	Glutamate_transport_system	GH112	0.624705	136	4.44089e-16	5.32907e-14	8.57804e-14
Stool	M00237	Branched-chain_amino_acid_transport_system	GH27	-0.623786	136	4.44089e-16	5.32907e-14	8.57005e-14
Stool	M00300	Putrescine_transport_system	GH35	-0.623887	136	4.44089e-16	5.32907e-14	8.56207e-14
Supragingival plaque	M00006	Pentose_phosphate_pathway__oxidative_phase__glucose_6P_=__ribulose_5P	GH24	-0.665505	115	4.44089e-16	5.32907e-14	8.5541e-14
Supragingival plaque	M00060	Lipopolysaccharide_biosynthesis__KDO2-lipid_A	GH110	0.666784	115	4.44089e-16	5.32907e-14	8.54615e-14
Supragingival plaque	M00061	Uronic_acid_metabolism	GH115	0.66718	115	4.44089e-16	5.32907e-14	8.53822e-14
Supragingival plaque	M00233	Glutamate_transport_system	GH43	-0.667206	115	4.44089e-16	5.32907e-14	8.5303e-14
Supragingival plaque	M00278	PTS_system__sorbose-specific_II_component	GH89	0.665548	115	4.44089e-16	5.32907e-14	8.52239e-14
Supragingival plaque	M00307	Pyruvate_oxidation__pyruvate_=__acetyl-CoA	GH57	-0.666119	115	4.44089e-16	5.32907e-14	8.5145e-14
Tongue dorsum	M00048	Inosine_monophosphate_biosynthesis__PRPP___glutamine_=__IMP	GH38	0.649886	123	4.44089e-16	5.32907e-14	8.50663e-14
Tongue dorsum	M00141	C1-unit_interconversion__eukaryotes	GH105	0.649075	123	4.44089e-16	5.32907e-14	8.49876e-14
Tongue dorsum	M00172	C4-dicarboxylic_acid_cycle__NADP__-malic_enzyme_type	GH57	0.648766	123	4.44089e-16	5.32907e-14	8.49092e-14
Tongue dorsum	M00173	Reductive_citric_acid_cycle__Arnon-Buchanan_cycle_	GH26	0.649105	123	4.44089e-16	5.32907e-14	8.48308e-14
Tongue dorsum	M00199	Lactose_L-arabinose_transport_system	GH51	0.650015	123	4.44089e-16	5.32907e-14	8.47526e-14
Tongue dorsum	M00270	PTS_system__trehalose-specific_II_component	GH65	-0.648819	123	4.44089e-16	5.32907e-14	8.46746e-14
Tongue dorsum	M00311	2-oxoglutarate_ferredoxin_oxidoreductase	GH18	0.649118	123	4.44089e-16	5.32907e-14	8.45967e-14
Tongue dorsum	M00312	2-oxoisovalerate_ferredoxin_oxidoreductase	GH43	0.648804	123	4.44089e-16	5.32907e-14	8.4519e-14
Tongue dorsum	M00346	Formaldehyde_assimilation__serine_pathway	GH76	-0.650154	123	4.44089e-16	5.32907e-14	8.44413e-14
Tongue dorsum	M00359	Aminoacyl-tRNA_biosynthesis__eukaryotes	GH97	0.650137	123	4.44089e-16	5.32907e-14	8.43639e-14
Buccal mucosa	M00124	Pyridoxal_biosynthesis__erythrose-4P_=__pyridoxal-5P	GH57	0.677994	109	5.55112e-16	6.66134e-14	1.05358e-13
Stool	M00006	Pentose_phosphate_pathway__oxidative_phase__glucose_6P_=__ribulose_5P	GH27	0.622908	136	5.55112e-16	6.66134e-14	1.05262e-13
Stool	M00008	Entner-Doudoroff_pathway__glucose-6P_=__glyceraldehyde-3P___pyruvate	GH28	0.62334	136	5.55112e-16	6.66134e-14	1.05166e-13
Stool	M00018	Threonine_biosynthesis__apartate_=__homoserine_=__threonine	GH78	-0.622933	136	5.55112e-16	6.66134e-14	1.05069e-13
Stool	M00052	Pyrimidine_ribonucleotide_biosynthesis__UMP_=__UDP_UTP_CDP_CTP	GH4	-0.622603	136	5.55112e-16	6.66134e-14	1.04973e-13
Stool	M00159	V-type_ATPase__prokaryotes	GH95	-0.623005	136	5.55112e-16	6.66134e-14	1.04878e-13
Stool	M00193	Putative_spermidine_putrescine_transport_system	GH95	-0.62349	136	5.55112e-16	6.66134e-14	1.04782e-13
Stool	M00202	Oligogalacturonide_transport_system	GH113	0.623173	136	5.55112e-16	6.66134e-14	1.04687e-13
Stool	M00300	Putrescine_transport_system	PL1	-0.622776	136	5.55112e-16	6.66134e-14	1.04591e-13
Supragingival plaque	M00046	beta-Alanine_biosynthesis__cytosine___uracil_=__beta-alanine	GH43	0.664125	115	5.55112e-16	6.66134e-14	1.04496e-13
Supragingival plaque	M00360	Aminoacyl-tRNA_biosynthesis__prokaryotes	GH116	0.665247	115	5.55112e-16	6.66134e-14	1.04401e-13
Tongue dorsum	M00007	Pentose_phosphate_pathway__non-oxidative_phase__fructose_6P_=__ribose_5P	GH57	0.648249	123	5.55112e-16	6.66134e-14	1.04307e-13
Tongue dorsum	M00050	Guanine_nucleotide_biosynthesis__IMP_=__GDP_dGDP_GTP_dGTP	GH42	0.647725	123	5.55112e-16	6.66134e-14	1.04212e-13
Tongue dorsum	M00098	Acylglycerol_degradation	GH85	-0.647236	123	5.55112e-16	6.66134e-14	1.04118e-13
Tongue dorsum	M00197	Putative_sugar_transport_system	GH70	0.648371	123	5.55112e-16	6.66134e-14	1.04023e-13
Tongue dorsum	M00270	PTS_system__trehalose-specific_II_component	GH102	-0.647774	123	5.55112e-16	6.66134e-14	1.03929e-13
Tongue dorsum	M00277	PTS_system__N-acetylgalactosamine-specific_II_component	GH102	-0.647632	123	5.55112e-16	6.66134e-14	1.03836e-13
Tongue dorsum	M00311	2-oxoglutarate_ferredoxin_oxidoreductase	PL1	0.6486	123	5.55112e-16	6.66134e-14	1.03742e-13
Tongue dorsum	M00312	2-oxoisovalerate_ferredoxin_oxidoreductase	GH51	0.647878	123	5.55112e-16	6.66134e-14	1.03648e-13
Tongue dorsum	M00360	Aminoacyl-tRNA_biosynthesis__prokaryotes	GH103	-0.647795	123	5.55112e-16	6.66134e-14	1.03555e-13
Anterior nares	M00201	alpha-Glucoside_transport_system	GH85	0.732946	87	6.66134e-16	7.99361e-14	1.24154e-13
Buccal mucosa	M00229	Arginine_transport_system	GH103	0.676128	109	6.66134e-16	7.99361e-14	1.24042e-13
Stool	M00008	Entner-Doudoroff_pathway__glucose-6P_=__glyceraldehyde-3P___pyruvate	PL13	0.622252	136	6.66134e-16	7.99361e-14	1.23931e-13
Stool	M00045	Histidine_degradation__histidine_=__N-formiminoglutamate_=__glutamate	GH76	0.62136	136	6.66134e-16	7.99361e-14	1.2382e-13
Stool	M00052	Pyrimidine_ribonucleotide_biosynthesis__UMP_=__UDP_UTP_CDP_CTP	GH105	0.621352	136	6.66134e-16	7.99361e-14	1.23709e-13
Stool	M00079	Keratan_sulfate_degradation	GH43	0.621729	136	6.66134e-16	7.99361e-14	1.23598e-13
Stool	M00087	beta-Oxidation	PL11	-0.621203	136	6.66134e-16	7.99361e-14	1.23487e-13
Stool	M00201	alpha-Glucoside_transport_system	GH94	0.622204	136	6.66134e-16	7.99361e-14	1.23377e-13
Stool	M00202	Oligogalacturonide_transport_system	PL11	-0.621262	136	6.66134e-16	7.99361e-14	1.23266e-13
Stool	M00270	PTS_system__trehalose-specific_II_component	GH95	-0.621999	136	6.66134e-16	7.99361e-14	1.23156e-13
Stool	M00359	Aminoacyl-tRNA_biosynthesis__eukaryotes	GH50	-0.621197	136	6.66134e-16	7.99361e-14	1.23046e-13
Supragingival plaque	M00004	Pentose_phosphate_pathway__Pentose_phosphate_cycle_	GH63	-0.663581	115	6.66134e-16	7.99361e-14	1.22937e-13
Supragingival plaque	M00077	Chondroitin_sulfate_degradation	GH105	0.663084	115	6.66134e-16	7.99361e-14	1.22827e-13
Supragingival plaque	M00233	Glutamate_transport_system	GH18	-0.663769	115	6.66134e-16	7.99361e-14	1.22718e-13
Tongue dorsum	M00173	Reductive_citric_acid_cycle__Arnon-Buchanan_cycle_	GH4	0.646927	123	6.66134e-16	7.99361e-14	1.22609e-13
Tongue dorsum	M00176	Sulfur_reduction__sulfate_=__H2S	GH42	0.646797	123	6.66134e-16	7.99361e-14	1.225e-13
Tongue dorsum	M00194	Maltose_maltodextrin_transport_system	GH110	-0.646673	123	6.66134e-16	7.99361e-14	1.22391e-13
Tongue dorsum	M00277	PTS_system__N-acetylgalactosamine-specific_II_component	GH103	-0.646524	123	6.66134e-16	7.99361e-14	1.22283e-13
Tongue dorsum	M00319	Manganese_zinc_iron_transport_system	GH53	0.646689	123	6.66134e-16	7.99361e-14	1.22175e-13
Tongue dorsum	M00346	Formaldehyde_assimilation__serine_pathway	GH114	0.646907	123	6.66134e-16	7.99361e-14	1.22066e-13
Stool	M00060	Lipopolysaccharide_biosynthesis__KDO2-lipid_A	GH78	0.620497	136	7.77156e-16	9.32587e-14	1.42285e-13
Stool	M00124	Pyridoxal_biosynthesis__erythrose-4P_=__pyridoxal-5P	PL1	0.621085	136	7.77156e-16	9.32587e-14	1.42159e-13
Stool	M00202	Oligogalacturonide_transport_system	GH88	-0.620703	136	7.77156e-16	9.32587e-14	1.42034e-13
Stool	M00245	Cobalt_transport_system	GH112	0.620655	136	7.77156e-16	9.32587e-14	1.41908e-13
Stool	M00270	PTS_system__trehalose-specific_II_component	GH106	-0.620415	136	7.77156e-16	9.32587e-14	1.41783e-13
Supragingival plaque	M00366	C10-C20_isoprenoid_biosynthesis__plants	GH66	0.66178	115	7.77156e-16	9.32587e-14	1.41659e-13
Tongue dorsum	M00077	Chondroitin_sulfate_degradation	GH51	0.645762	123	7.77156e-16	9.32587e-14	1.41534e-13
Tongue dorsum	M00087	beta-Oxidation	GH4	0.645771	123	7.77156e-16	9.32587e-14	1.4141e-13
Tongue dorsum	M00336	Twin-arginine_translocation__Tat__system	GH103	0.645137	123	7.77156e-16	9.32587e-14	1.41285e-13
Anterior nares	M00156	Complex_IV__Cytochrome_c_oxidase___cytochrome_c_oxidase__cbb3-type	GH103	0.73086	87	8.88178e-16	1.06581e-13	1.61327e-13
Stool	M00061	Uronic_acid_metabolism	GH106	0.619149	136	8.88178e-16	1.06581e-13	1.61186e-13
Stool	M00098	Acylglycerol_degradation	GH3	-0.619818	136	8.88178e-16	1.06581e-13	1.61045e-13
Stool	M00123	Biotin_biosynthesis__pimeloyl-CoA_=__biotin	GH43	0.619936	136	8.88178e-16	1.06581e-13	1.60904e-13
Stool	M00127	Thiamine_biosynthesis__AIR_=__thiamine-P_thiamine-2P	PL15	-0.619164	136	8.88178e-16	1.06581e-13	1.60763e-13
Stool	M00194	Maltose_maltodextrin_transport_system	GH111	0.619284	136	8.88178e-16	1.06581e-13	1.60623e-13
Stool	M00359	Aminoacyl-tRNA_biosynthesis__eukaryotes	GH92	-0.619811	136	8.88178e-16	1.06581e-13	1.60483e-13
Stool	M00360	Aminoacyl-tRNA_biosynthesis__prokaryotes	GH78	-0.619407	136	8.88178e-16	1.06581e-13	1.60343e-13
Supragingival plaque	M00076	Dermatan_sulfate_degradation	GH43	0.661181	115	8.88178e-16	1.06581e-13	1.60203e-13
Supragingival plaque	M00202	Oligogalacturonide_transport_system	GH51	0.66138	115	8.88178e-16	1.06581e-13	1.60064e-13
Supragingival plaque	M00307	Pyruvate_oxidation__pyruvate_=__acetyl-CoA	GH115	-0.661079	115	8.88178e-16	1.06581e-13	1.59925e-13
Tongue dorsum	M00051	Uridine_monophosphate_biosynthesis__glutamine____PRPP__=__UMP	GH38	-0.644227	123	8.88178e-16	1.06581e-13	1.59786e-13
Tongue dorsum	M00141	C1-unit_interconversion__eukaryotes	GH102	-0.644535	123	8.88178e-16	1.06581e-13	1.59647e-13
Tongue dorsum	M00194	Maltose_maltodextrin_transport_system	GH68	0.644162	123	8.88178e-16	1.06581e-13	1.59508e-13
Tongue dorsum	M00276	PTS_system__mannose-specific_II_component	GH76	0.644247	123	8.88178e-16	1.06581e-13	1.5937e-13
Tongue dorsum	M00287	PTS_system__galactosamine-specific_II_component	GH88	0.644741	123	8.88178e-16	1.06581e-13	1.59232e-13
Stool	M00061	Uronic_acid_metabolism	GH10	0.618584	136	9.99201e-16	1.19904e-13	1.78981e-13
Stool	M00076	Dermatan_sulfate_degradation	GH92	0.618852	136	9.99201e-16	1.19904e-13	1.78827e-13
Stool	M00087	beta-Oxidation	GH115	-0.61835	136	9.99201e-16	1.19904e-13	1.78672e-13
Supragingival plaque	M00233	Glutamate_transport_system	GH5	-0.659991	115	9.99201e-16	1.19904e-13	1.78518e-13
Buccal mucosa	M00334	Type_VI_secretion_system	GH87	0.672705	109	1.11022e-15	1.33227e-13	1.98182e-13
Stool	M00001	Glycolysis__Embden-Meyerhof_pathway___glucose_=__pyruvate	GH42	-0.617606	136	1.11022e-15	1.33227e-13	1.98011e-13
Stool	M00016	Lysine_biosynthesis__aspartate_=__lysine	GH105	-0.617689	136	1.11022e-15	1.33227e-13	1.97841e-13
Stool	M00052	Pyrimidine_ribonucleotide_biosynthesis__UMP_=__UDP_UTP_CDP_CTP	PL11	0.617927	136	1.11022e-15	1.33227e-13	1.97671e-13
Stool	M00052	Pyrimidine_ribonucleotide_biosynthesis__UMP_=__UDP_UTP_CDP_CTP	GH1	-0.617834	136	1.11022e-15	1.33227e-13	1.97501e-13
Stool	M00076	Dermatan_sulfate_degradation	GH33	0.617749	136	1.11022e-15	1.33227e-13	1.97331e-13
Stool	M00159	V-type_ATPase__prokaryotes	GH43	-0.617752	136	1.11022e-15	1.33227e-13	1.97162e-13
Stool	M00199	Lactose_L-arabinose_transport_system	GH92	-0.617665	136	1.11022e-15	1.33227e-13	1.96993e-13
Stool	M00202	Oligogalacturonide_transport_system	GH94	0.618248	136	1.11022e-15	1.33227e-13	1.96825e-13
Supragingival plaque	M00220	Rhamnose_transport_system	GH51	0.659684	115	1.11022e-15	1.33227e-13	1.96656e-13
Tongue dorsum	M00049	Adenine_nucleotide_biosynthesis__IMP_=__ADP_dADP_ATP_dATP	GH102	-0.642471	123	1.11022e-15	1.33227e-13	1.96488e-13
Tongue dorsum	M00173	Reductive_citric_acid_cycle__Arnon-Buchanan_cycle_	GH57	0.642433	123	1.11022e-15	1.33227e-13	1.9632e-13
Tongue dorsum	M00346	Formaldehyde_assimilation__serine_pathway	GH4	0.642967	123	1.11022e-15	1.33227e-13	1.96153e-13
Tongue dorsum	M00346	Formaldehyde_assimilation__serine_pathway	GH5	0.64238	123	1.11022e-15	1.33227e-13	1.95986e-13
Tongue dorsum	M00362	Nucleotide_sugar_biosynthesis__prokaryotes	GH114	0.642591	123	1.11022e-15	1.33227e-13	1.95819e-13
Stool	M00017	Methionine_biosynthesis__apartate_=__homoserine_=__methionine	GH113	0.617474	136	1.22125e-15	1.46549e-13	2.15219e-13
Stool	M00018	Threonine_biosynthesis__apartate_=__homoserine_=__threonine	PL1	-0.617288	136	1.22125e-15	1.46549e-13	2.15036e-13
Stool	M00087	beta-Oxidation	PL1	-0.616956	136	1.22125e-15	1.46549e-13	2.14853e-13
Stool	M00133	Polyamine_biosynthesis__arginine_=__agmatine_=__putrescine_=__spermidine	GH1	0.617204	136	1.22125e-15	1.46549e-13	2.1467e-13
Stool	M00197	Putative_sugar_transport_system	GH28	-0.617163	136	1.22125e-15	1.46549e-13	2.14488e-13
Stool	M00201	alpha-Glucoside_transport_system	GH113	0.617418	136	1.22125e-15	1.46549e-13	2.14307e-13
Supragingival plaque	M00023	Tryptophan_biosynthesis__chorismate_=__tryptophan	GH67	-0.658797	115	1.22125e-15	1.46549e-13	2.14125e-13
Supragingival plaque	M00133	Polyamine_biosynthesis__arginine_=__agmatine_=__putrescine_=__spermidine	GH18	0.65863	115	1.22125e-15	1.46549e-13	2.13944e-13
Supragingival plaque	M00366	C10-C20_isoprenoid_biosynthesis__plants	GH5	0.65857	115	1.22125e-15	1.46549e-13	2.13763e-13
Tongue dorsum	M00198	sn-Glycerol_3-phosphate_transport_system	GH102	-0.642172	123	1.22125e-15	1.46549e-13	2.13583e-13
Buccal mucosa	M00150	Complex_II__succinate_dehydrogenase___fumarate_reductase___fumarate_reductase	GH102	0.671315	109	1.33227e-15	1.59872e-13	2.32802e-13
Stool	M00016	Lysine_biosynthesis__aspartate_=__lysine	GH43	-0.616314	136	1.33227e-15	1.59872e-13	2.32606e-13
Stool	M00028	Ornithine_biosynthesis__glutamate_=__ornithine	GH112	0.616654	136	1.33227e-15	1.59872e-13	2.3241e-13
Stool	M00127	Thiamine_biosynthesis__AIR_=__thiamine-P_thiamine-2P	GH4	0.616392	136	1.33227e-15	1.59872e-13	2.32214e-13
Stool	M00183	RNA_polymerase__bacteria	GH105	-0.616661	136	1.33227e-15	1.59872e-13	2.32019e-13
Stool	M00202	Oligogalacturonide_transport_system	GH20	-0.616727	136	1.33227e-15	1.59872e-13	2.31824e-13
Supragingival plaque	M00061	Uronic_acid_metabolism	GH63	0.658136	115	1.33227e-15	1.59872e-13	2.31629e-13
Tongue dorsum	M00060	Lipopolysaccharide_biosynthesis__KDO2-lipid_A	GH109	0.641564	123	1.33227e-15	1.59872e-13	2.31435e-13
Tongue dorsum	M00199	Lactose_L-arabinose_transport_system	GH53	0.641264	123	1.33227e-15	1.59872e-13	2.31241e-13
Tongue dorsum	M00319	Manganese_zinc_iron_transport_system	GH43	0.641396	123	1.33227e-15	1.59872e-13	2.31047e-13
Stool	M00016	Lysine_biosynthesis__aspartate_=__lysine	GH95	-0.61601	136	1.44329e-15	1.73195e-13	2.50091e-13
Stool	M00183	RNA_polymerase__bacteria	GH94	0.616084	136	1.44329e-15	1.73195e-13	2.49882e-13
Stool	M00326	RTX_toxin_transport_system	GH43	-0.616178	136	1.44329e-15	1.73195e-13	2.49673e-13
Supragingival plaque	M00276	PTS_system__mannose-specific_II_component	GH26	-0.657382	115	1.44329e-15	1.73195e-13	2.49465e-13
Tongue dorsum	M00346	Formaldehyde_assimilation__serine_pathway	GH27	0.640986	123	1.44329e-15	1.73195e-13	2.49257e-13
Stool	M00008	Entner-Doudoroff_pathway__glucose-6P_=__glyceraldehyde-3P___pyruvate	GH50	0.615647	136	1.55431e-15	1.86517e-13	2.68207e-13
Stool	M00015	Proline_biosynthesis__glutamate_=__proline	GH35	0.615663	136	1.55431e-15	1.86517e-13	2.67983e-13
Stool	M00061	Uronic_acid_metabolism	GH115	0.6154	136	1.55431e-15	1.86517e-13	2.6776e-13
Stool	M00098	Acylglycerol_degradation	PL13	-0.615499	136	1.55431e-15	1.86517e-13	2.67538e-13
Stool	M00183	RNA_polymerase__bacteria	PL11	-0.615324	136	1.55431e-15	1.86517e-13	2.67316e-13
Stool	M00201	alpha-Glucoside_transport_system	GH97	-0.615616	136	1.55431e-15	1.86517e-13	2.67094e-13
Stool	M00245	Cobalt_transport_system	GH111	0.615465	136	1.55431e-15	1.86517e-13	2.66872e-13
Stool	M00360	Aminoacyl-tRNA_biosynthesis__prokaryotes	GH50	-0.615344	136	1.55431e-15	1.86517e-13	2.66651e-13
Supragingival plaque	M00004	Pentose_phosphate_pathway__Pentose_phosphate_cycle_	GH106	-0.657012	115	1.55431e-15	1.86517e-13	2.6643e-13
Supragingival plaque	M00077	Chondroitin_sulfate_degradation	GH27	0.656937	115	1.55431e-15	1.86517e-13	2.6621e-13
Supragingival plaque	M00077	Chondroitin_sulfate_degradation	GH106	0.656861	115	1.55431e-15	1.86517e-13	2.6599e-13
Supragingival plaque	M00124	Pyridoxal_biosynthesis__erythrose-4P_=__pyridoxal-5P	GH28	0.657148	115	1.55431e-15	1.86517e-13	2.6577e-13
Supragingival plaque	M00172	C4-dicarboxylic_acid_cycle__NADP__-malic_enzyme_type	GH89	0.656781	115	1.55431e-15	1.86517e-13	2.65551e-13
Supragingival plaque	M00360	Aminoacyl-tRNA_biosynthesis__prokaryotes	GH51	0.656859	115	1.55431e-15	1.86517e-13	2.65332e-13
Tongue dorsum	M00198	sn-Glycerol_3-phosphate_transport_system	GH103	-0.640336	123	1.55431e-15	1.86517e-13	2.65114e-13
Stool	M00045	Histidine_degradation__histidine_=__N-formiminoglutamate_=__glutamate	GH28	0.615011	136	1.66533e-15	1.9984e-13	2.83816e-13
Stool	M00052	Pyrimidine_ribonucleotide_biosynthesis__UMP_=__UDP_UTP_CDP_CTP	GH35	0.615092	136	1.66533e-15	1.9984e-13	2.83583e-13
Stool	M00060	Lipopolysaccharide_biosynthesis__KDO2-lipid_A	GH35	0.614772	136	1.66533e-15	1.9984e-13	2.8335e-13
Stool	M00144	Complex_I__NADH_dehydrogenase___NADH_dehydrogenase_I	GH97	0.614827	136	1.66533e-15	1.9984e-13	2.83117e-13
Stool	M00311	2-oxoglutarate_ferredoxin_oxidoreductase	GH57	0.615073	136	1.66533e-15	1.9984e-13	2.82885e-13
Stool	M00352	Spliceosome__U2-snRNP	GH47	0.614936	136	1.66533e-15	1.9984e-13	2.82653e-13
Supragingival plaque	M00120	Coenzyme_A_biosynthesis__pantothenate_=__CoA	GH57	-0.656268	115	1.66533e-15	1.9984e-13	2.82421e-13
Supragingival plaque	M00202	Oligogalacturonide_transport_system	GH78	0.656642	115	1.66533e-15	1.9984e-13	2.8219e-13
Tongue dorsum	M00319	Manganese_zinc_iron_transport_system	GH26	0.639585	123	1.66533e-15	1.9984e-13	2.8196e-13
Stool	M00098	Acylglycerol_degradation	GH109	-0.614412	136	1.77636e-15	2.13163e-13	3.00513e-13
Stool	M00123	Biotin_biosynthesis__pimeloyl-CoA_=__biotin	PL1	0.61462	136	1.77636e-15	2.13163e-13	3.00267e-13
Stool	M00144	Complex_I__NADH_dehydrogenase___NADH_dehydrogenase_I	GH35	0.614608	136	1.77636e-15	2.13163e-13	3.00022e-13
Stool	M00144	Complex_I__NADH_dehydrogenase___NADH_dehydrogenase_I	GH89	0.61446	136	1.77636e-15	2.13163e-13	2.99778e-13
Supragingival plaque	M00233	Glutamate_transport_system	GH105	-0.655854	115	1.77636e-15	2.13163e-13	2.99534e-13
Supragingival plaque	M00304	PTS_system__fructose-specific_II_component	GH78	-0.655689	115	1.77636e-15	2.13163e-13	2.9929e-13
Supragingival plaque	M00366	C10-C20_isoprenoid_biosynthesis__plants	GH109	0.656112	115	1.77636e-15	2.13163e-13	2.99047e-13
Buccal mucosa	M00225	Lysine_arginine_ornithine_transport_system	GH8	0.668955	109	1.88738e-15	2.26485e-13	3.17478e-13
Stool	M00045	Histidine_degradation__histidine_=__N-formiminoglutamate_=__glutamate	GH97	0.613815	136	1.88738e-15	2.26485e-13	3.17221e-13
Stool	M00123	Biotin_biosynthesis__pimeloyl-CoA_=__biotin	GH95	0.614135	136	1.88738e-15	2.26485e-13	3.16964e-13
Supragingival plaque	M00156	Complex_IV__Cytochrome_c_oxidase___cytochrome_c_oxidase__cbb3-type	GH103	0.655439	115	1.88738e-15	2.26485e-13	3.16707e-13
Tongue dorsum	M00319	Manganese_zinc_iron_transport_system	GH76	-0.6388	123	1.88738e-15	2.26485e-13	3.1645e-13
Tongue dorsum	M00348	Glutathione_transport_system	GH57	0.638791	123	1.88738e-15	2.26485e-13	3.16194e-13
Stool	M00087	beta-Oxidation	GH33	-0.613361	136	1.9984e-15	2.39808e-13	3.34523e-13
Stool	M00178	Ribosome__bacteria	GH20	-0.613357	136	1.9984e-15	2.39808e-13	3.34253e-13
Stool	M00183	RNA_polymerase__bacteria	GH89	-0.613443	136	1.9984e-15	2.39808e-13	3.33983e-13
Stool	M00201	alpha-Glucoside_transport_system	GH92	-0.613641	136	1.9984e-15	2.39808e-13	3.33713e-13
Tongue dorsum	M00175	Nitrogen_fixation__N2_=__ammonia	GH1	0.638181	123	1.9984e-15	2.39808e-13	3.33445e-13
Tongue dorsum	M00359	Aminoacyl-tRNA_biosynthesis__eukaryotes	GH18	0.638118	123	1.9984e-15	2.39808e-13	3.33176e-13
Stool	M00006	Pentose_phosphate_pathway__oxidative_phase__glucose_6P_=__ribulose_5P	GH115	0.613006	136	2.10942e-15	2.53131e-13	3.51403e-13
Stool	M00008	Entner-Doudoroff_pathway__glucose-6P_=__glyceraldehyde-3P___pyruvate	GH42	0.613287	136	2.10942e-15	2.53131e-13	3.5112e-13
Stool	M00126	Tetrahydrofolate_biosynthesis__GTP_=__THF	PL1	0.61333	136	2.10942e-15	2.53131e-13	3.50838e-13
Stool	M00226	Histidine_transport_system	GH112	0.613246	136	2.10942e-15	2.53131e-13	3.50556e-13
Stool	M00359	Aminoacyl-tRNA_biosynthesis__eukaryotes	GH105	-0.613158	136	2.10942e-15	2.53131e-13	3.50275e-13
Stool	M00360	Aminoacyl-tRNA_biosynthesis__prokaryotes	GH92	-0.613044	136	2.10942e-15	2.53131e-13	3.49995e-13
Supragingival plaque	M00004	Pentose_phosphate_pathway__Pentose_phosphate_cycle_	GH116	-0.654766	115	2.10942e-15	2.53131e-13	3.49714e-13
Supragingival plaque	M00276	PTS_system__mannose-specific_II_component	GH30	-0.654794	115	2.10942e-15	2.53131e-13	3.49435e-13
Tongue dorsum	M00307	Pyruvate_oxidation__pyruvate_=__acetyl-CoA	GH18	-0.637866	123	2.10942e-15	2.53131e-13	3.49155e-13
Stool	M00016	Lysine_biosynthesis__aspartate_=__lysine	GH4	0.612662	136	2.22045e-15	2.66454e-13	3.6724e-13
Stool	M00052	Pyrimidine_ribonucleotide_biosynthesis__UMP_=__UDP_UTP_CDP_CTP	GH88	0.61277	136	2.22045e-15	2.66454e-13	3.66947e-13
Stool	M00183	RNA_polymerase__bacteria	GH106	-0.612746	136	2.22045e-15	2.66454e-13	3.66654e-13
Stool	M00183	RNA_polymerase__bacteria	GH2	-0.612764	136	2.22045e-15	2.66454e-13	3.66362e-13
Stool	M00276	PTS_system__mannose-specific_II_component	GH111	0.612874	136	2.22045e-15	2.66454e-13	3.6607e-13
Stool	M00300	Putrescine_transport_system	GH16	-0.612753	136	2.22045e-15	2.66454e-13	3.65779e-13
Stool	M00326	RTX_toxin_transport_system	GH89	-0.612796	136	2.22045e-15	2.66454e-13	3.65488e-13
Tongue dorsum	M00048	Inosine_monophosphate_biosynthesis__PRPP___glutamine_=__IMP	GH8	0.637625	123	2.22045e-15	2.66454e-13	3.65198e-13
Tongue dorsum	M00199	Lactose_L-arabinose_transport_system	GH26	0.63733	123	2.22045e-15	2.66454e-13	3.64908e-13
Tongue dorsum	M00359	Aminoacyl-tRNA_biosynthesis__eukaryotes	GH24	0.637335	123	2.22045e-15	2.66454e-13	3.64619e-13
Stool	M00006	Pentose_phosphate_pathway__oxidative_phase__glucose_6P_=__ribulose_5P	GH43	0.612355	136	2.33147e-15	2.79776e-13	3.82546e-13
Stool	M00144	Complex_I__NADH_dehydrogenase___NADH_dehydrogenase_I	GH94	-0.612412	136	2.33147e-15	2.79776e-13	3.82243e-13
Supragingival plaque	M00222	Phosphate_transport_system	GH24	-0.653454	115	2.44249e-15	2.93099e-13	4.00128e-13
Supragingival plaque	M00311	2-oxoglutarate_ferredoxin_oxidoreductase	GH9	0.653629	115	2.44249e-15	2.93099e-13	3.99811e-13
Tongue dorsum	M00023	Tryptophan_biosynthesis__chorismate_=__tryptophan	GH109	-0.636645	123	2.44249e-15	2.93099e-13	3.99496e-13
Tongue dorsum	M00307	Pyruvate_oxidation__pyruvate_=__acetyl-CoA	GH24	-0.636636	123	2.44249e-15	2.93099e-13	3.9918e-13
Tongue dorsum	M00326	RTX_toxin_transport_system	GH4	0.636711	123	2.44249e-15	2.93099e-13	3.98866e-13
Stool	M00026	Histidine_biosynthesis__PRPP_=__histidine	PL8	-0.611803	136	2.55351e-15	3.06422e-13	4.16667e-13
Supragingival plaque	M00276	PTS_system__mannose-specific_II_component	GH4	-0.653143	115	2.55351e-15	3.06422e-13	4.16339e-13
Buccal mucosa	M00225	Lysine_arginine_ornithine_transport_system	GH18	0.666245	109	2.66454e-15	3.19744e-13	4.341e-13
Stool	M00197	Putative_sugar_transport_system	GH33	-0.611513	136	2.66454e-15	3.19744e-13	4.33759e-13
Stool	M00200	Sorbitol_mannitol_transport_system	GH111	0.611517	136	2.66454e-15	3.19744e-13	4.33418e-13
Supragingival plaque	M00276	PTS_system__mannose-specific_II_component	GH27	-0.652715	115	2.66454e-15	3.19744e-13	4.33078e-13
Supragingival plaque	M00304	PTS_system__fructose-specific_II_component	GH43	-0.652733	115	2.66454e-15	3.19744e-13	4.32738e-13
Stool	M00026	Histidine_biosynthesis__PRPP_=__histidine	GH89	-0.610977	136	2.77556e-15	3.33067e-13	4.50415e-13
Tongue dorsum	M00120	Coenzyme_A_biosynthesis__pantothenate_=__CoA	GH65	-0.635838	123	2.77556e-15	3.33067e-13	4.50062e-13
Stool	M00016	Lysine_biosynthesis__aspartate_=__lysine	GH89	-0.610731	136	2.88658e-15	3.4639e-13	4.67698e-13
Tongue dorsum	M00336	Twin-arginine_translocation__Tat__system	GH57	-0.635546	123	2.88658e-15	3.4639e-13	4.67333e-13
Stool	M00119	Pantothenate_biosynthesis__valine_L-aspartate_=__pantothenate	GH106	0.61045	136	2.9976e-15	3.59712e-13	4.84927e-13
Stool	M00300	Putrescine_transport_system	GH27	-0.610417	136	2.9976e-15	3.59712e-13	4.84549e-13
Stool	M00004	Pentose_phosphate_pathway__Pentose_phosphate_cycle_	GH113	-0.610157	136	3.10862e-15	3.73035e-13	5.02103e-13
Stool	M00006	Pentose_phosphate_pathway__oxidative_phase__glucose_6P_=__ribulose_5P	PL1	0.610233	136	3.10862e-15	3.73035e-13	5.01711e-13
Stool	M00193	Putative_spermidine_putrescine_transport_system	GH35	-0.610178	136	3.10862e-15	3.73035e-13	5.01321e-13
Tongue dorsum	M00051	Uridine_monophosphate_biosynthesis__glutamine____PRPP__=__UMP	GH76	-0.634981	123	3.10862e-15	3.73035e-13	5.00931e-13
Anterior nares	M00201	alpha-Glucoside_transport_system	GH38	0.721567	87	3.21965e-15	3.86358e-13	5.18419e-13
Anterior nares	M00201	alpha-Glucoside_transport_system	GH95	0.721527	87	3.21965e-15	3.86358e-13	5.18016e-13
Stool	M00193	Putative_spermidine_putrescine_transport_system	GH66	-0.609845	136	3.21965e-15	3.86358e-13	5.17614e-13
Stool	M00361	Nucleotide_sugar_biosynthesis__eukaryotes	GH115	-0.610093	136	3.21965e-15	3.86358e-13	5.17212e-13
Tongue dorsum	M00194	Maltose_maltodextrin_transport_system	GH70	0.634528	123	3.21965e-15	3.86358e-13	5.16811e-13
Stool	M00008	Entner-Doudoroff_pathway__glucose-6P_=__glyceraldehyde-3P___pyruvate	GH16	0.609735	136	3.33067e-15	3.9968e-13	5.34218e-13
Tongue dorsum	M00061	Uronic_acid_metabolism	GH115	0.634469	123	3.33067e-15	3.9968e-13	5.33804e-13
Tongue dorsum	M00157	F-type_ATPase__bacteria	GH85	0.634274	123	3.33067e-15	3.9968e-13	5.33391e-13
Tongue dorsum	M00164	ATP_synthase	GH85	0.634274	123	3.33067e-15	3.9968e-13	5.32979e-13
Supragingival plaque	M00133	Polyamine_biosynthesis__arginine_=__agmatine_=__putrescine_=__spermidine	GH66	0.650872	115	3.44169e-15	4.13003e-13	5.5032e-13
Supragingival plaque	M00233	Glutamate_transport_system	GH29	-0.650904	115	3.44169e-15	4.13003e-13	5.49895e-13
Supragingival plaque	M00349	Microcin_C_transport_system	GH102	0.65074	115	3.44169e-15	4.13003e-13	5.49471e-13
Tongue dorsum	M00049	Adenine_nucleotide_biosynthesis__IMP_=__ADP_dADP_ATP_dATP	GH103	-0.634123	123	3.44169e-15	4.13003e-13	5.49048e-13
Tongue dorsum	M00050	Guanine_nucleotide_biosynthesis__IMP_=__GDP_dGDP_GTP_dGTP	GH53	0.634121	123	3.44169e-15	4.13003e-13	5.48625e-13
Tongue dorsum	M00061	Uronic_acid_metabolism	GH4	0.634105	123	3.44169e-15	4.13003e-13	5.48203e-13
Stool	M00133	Polyamine_biosynthesis__arginine_=__agmatine_=__putrescine_=__spermidine	GH4	0.609333	136	3.55271e-15	4.26326e-13	5.65452e-13
Stool	M00002	Glycolysis__core_module_involving_three-carbon_compounds	GH42	-0.608896	136	3.66374e-15	4.39648e-13	5.82675e-13
Stool	M00004	Pentose_phosphate_pathway__Pentose_phosphate_cycle_	GH16	0.60892	136	3.66374e-15	4.39648e-13	5.82228e-13
Stool	M00015	Proline_biosynthesis__glutamate_=__proline	GH20	0.608948	136	3.66374e-15	4.39648e-13	5.81782e-13
Stool	M00079	Keratan_sulfate_degradation	GH28	0.60888	136	3.66374e-15	4.39648e-13	5.81336e-13
Stool	M00119	Pantothenate_biosynthesis__valine_L-aspartate_=__pantothenate	PL11	0.609024	136	3.66374e-15	4.39648e-13	5.80891e-13
Stool	M00159	V-type_ATPase__prokaryotes	GH111	0.608914	136	3.66374e-15	4.39648e-13	5.80446e-13
Supragingival plaque	M00061	Uronic_acid_metabolism	PL11	0.650464	115	3.66374e-15	4.39648e-13	5.80003e-13
Tongue dorsum	M00050	Guanine_nucleotide_biosynthesis__IMP_=__GDP_dGDP_GTP_dGTP	GH102	-0.633567	123	3.66374e-15	4.39648e-13	5.79559e-13
Supragingival plaque	M00023	Tryptophan_biosynthesis__chorismate_=__tryptophan	GH10	-0.650035	115	3.77476e-15	4.52971e-13	5.96666e-13
Tongue dorsum	M00006	Pentose_phosphate_pathway__oxidative_phase__glucose_6P_=__ribulose_5P	GH26	-0.63334	123	3.77476e-15	4.52971e-13	5.96211e-13
Stool	M00326	RTX_toxin_transport_system	GH92	-0.608438	136	3.88578e-15	4.66294e-13	6.13278e-13
Supragingival plaque	M00036	Leucine_degradation__leucine_=__acetoacetate___acetyl-CoA	GH57	0.649892	115	3.88578e-15	4.66294e-13	6.12811e-13
Stool	M00019	Leucine_biosynthesis__pyruvate_=__2-oxoisovalerate_=__leucine	GH106	0.608419	136	3.9968e-15	4.79616e-13	6.2984e-13
Stool	M00193	Putative_spermidine_putrescine_transport_system	GH15	-0.60836	136	3.9968e-15	4.79616e-13	6.29361e-13
Stool	M00270	PTS_system__trehalose-specific_II_component	GH2	-0.608382	136	3.9968e-15	4.79616e-13	6.28883e-13
Stool	M00361	Nucleotide_sugar_biosynthesis__eukaryotes	GH35	-0.608358	136	3.9968e-15	4.79616e-13	6.28405e-13
Supragingival plaque	M00079	Keratan_sulfate_degradation	GH115	0.649786	115	3.9968e-15	4.79616e-13	6.27928e-13
Supragingival plaque	M00159	V-type_ATPase__prokaryotes	GH89	0.649626	115	3.9968e-15	4.79616e-13	6.27452e-13
Buccal mucosa	M00324	Dipeptide_transport_system	GH103	0.662903	109	4.10783e-15	4.92939e-13	6.44394e-13
Stool	M00159	V-type_ATPase__prokaryotes	GH28	-0.608134	136	4.10783e-15	4.92939e-13	6.43906e-13
Supragingival plaque	M00233	Glutamate_transport_system	GH4	-0.649371	115	4.10783e-15	4.92939e-13	6.43419e-13
Tongue dorsum	M00133	Polyamine_biosynthesis__arginine_=__agmatine_=__putrescine_=__spermidine	GH16	0.632703	123	4.10783e-15	4.92939e-13	6.42933e-13
Stool	M00006	Pentose_phosphate_pathway__oxidative_phase__glucose_6P_=__ribulose_5P	GH113	-0.607874	136	4.21885e-15	5.06262e-13	6.5981e-13
Stool	M00119	Pantothenate_biosynthesis__valine_L-aspartate_=__pantothenate	GH15	0.607858	136	4.21885e-15	5.06262e-13	6.59312e-13
Stool	M00006	Pentose_phosphate_pathway__oxidative_phase__glucose_6P_=__ribulose_5P	GH50	0.607751	136	4.32987e-15	5.19584e-13	6.76152e-13
Supragingival plaque	M00036	Leucine_degradation__leucine_=__acetoacetate___acetyl-CoA	GH5	0.649068	115	4.32987e-15	5.19584e-13	6.75642e-13
Supragingival plaque	M00061	Uronic_acid_metabolism	GH27	0.649006	115	4.32987e-15	5.19584e-13	6.75134e-13
Supragingival plaque	M00233	Glutamate_transport_system	GH89	-0.649071	115	4.32987e-15	5.19584e-13	6.74626e-13
Stool	M00178	Ribosome__bacteria	GH78	-0.607582	136	4.44089e-15	5.32907e-13	6.91403e-13
Stool	M00197	Putative_sugar_transport_system	PL11	-0.607463	136	4.44089e-15	5.32907e-13	6.90884e-13
Stool	M00022	Shikimate_pathway__phosphoenolpyruvate___erythrose-4P_=__chorismate	GH15	-0.607351	136	4.55191e-15	5.4623e-13	7.07624e-13
Stool	M00098	Acylglycerol_degradation	PL15	-0.607291	136	4.55191e-15	5.4623e-13	7.07093e-13
Stool	M00004	Pentose_phosphate_pathway__Pentose_phosphate_cycle_	GH95	0.607053	136	4.66294e-15	5.59552e-13	7.23797e-13
Stool	M00045	Histidine_degradation__histidine_=__N-formiminoglutamate_=__glutamate	GH27	0.607219	136	4.66294e-15	5.59552e-13	7.23255e-13
Supragingival plaque	M00006	Pentose_phosphate_pathway__oxidative_phase__glucose_6P_=__ribulose_5P	GH88	-0.648481	115	4.66294e-15	5.59552e-13	7.22714e-13
Stool	M00197	Putative_sugar_transport_system	GH89	-0.606915	136	4.77396e-15	5.72875e-13	7.39368e-13
Stool	M00237	Branched-chain_amino_acid_transport_system	GH3	-0.606994	136	4.77396e-15	5.72875e-13	7.38815e-13
Supragingival plaque	M00004	Pentose_phosphate_pathway__Pentose_phosphate_cycle_	GH114	-0.648216	115	4.77396e-15	5.72875e-13	7.38263e-13
Supragingival plaque	M00076	Dermatan_sulfate_degradation	GH89	0.648293	115	4.77396e-15	5.72875e-13	7.37712e-13
Stool	M00270	PTS_system__trehalose-specific_II_component	GH88	-0.606814	136	4.88498e-15	5.86198e-13	7.54305e-13
Buccal mucosa	M00334	Type_VI_secretion_system	GH65	0.661295	109	4.996e-15	5.9952e-13	7.70873e-13
Stool	M00045	Histidine_degradation__histidine_=__N-formiminoglutamate_=__glutamate	GH115	0.606669	136	4.996e-15	5.9952e-13	7.70299e-13
Stool	M00133	Polyamine_biosynthesis__arginine_=__agmatine_=__putrescine_=__spermidine	GH112	0.606637	136	4.996e-15	5.9952e-13	7.69726e-13
Stool	M00199	Lactose_L-arabinose_transport_system	GH114	0.606625	136	4.996e-15	5.9952e-13	7.69154e-13
Tongue dorsum	M00359	Aminoacyl-tRNA_biosynthesis__eukaryotes	GH5	0.631229	123	4.996e-15	5.9952e-13	7.68582e-13
Tongue dorsum	M00361	Nucleotide_sugar_biosynthesis__eukaryotes	GH114	0.631289	123	4.996e-15	5.9952e-13	7.68012e-13
Stool	M00016	Lysine_biosynthesis__aspartate_=__lysine	GH115	-0.606491	136	5.10703e-15	6.12843e-13	7.84497e-13
Stool	M00201	alpha-Glucoside_transport_system	GH28	-0.606465	136	5.10703e-15	6.12843e-13	7.83916e-13
Stool	M00206	Cellobiose_transport_system	GH28	-0.606488	136	5.10703e-15	6.12843e-13	7.83335e-13
Stool	M00237	Branched-chain_amino_acid_transport_system	GH30	-0.606515	136	5.10703e-15	6.12843e-13	7.82755e-13
Stool	M00194	Maltose_maltodextrin_transport_system	GH92	-0.606237	136	5.21805e-15	6.26166e-13	7.9918e-13
Supragingival plaque	M00117	Ubiquinone_biosynthesis__prokaryotes__chorismate_=__ubiquinone	GH17	0.647577	115	5.21805e-15	6.26166e-13	7.98589e-13
Tongue dorsum	M00229	Arginine_transport_system	GH110	0.630881	123	5.21805e-15	6.26166e-13	7.97999e-13
Stool	M00008	Entner-Doudoroff_pathway__glucose-6P_=__glyceraldehyde-3P___pyruvate	PL9	0.606077	136	5.32907e-15	6.39488e-13	8.14376e-13
Stool	M00022	Shikimate_pathway__phosphoenolpyruvate___erythrose-4P_=__chorismate	GH29	-0.606047	136	5.32907e-15	6.39488e-13	8.13776e-13
Supragingival plaque	M00220	Rhamnose_transport_system	GH43	0.647376	115	5.32907e-15	6.39488e-13	8.13176e-13
Stool	M00127	Thiamine_biosynthesis__AIR_=__thiamine-P_thiamine-2P	PL13	-0.605927	136	5.44009e-15	6.52811e-13	8.29506e-13
Stool	M00197	Putative_sugar_transport_system	GH39	0.605898	136	5.44009e-15	6.52811e-13	8.28895e-13
Stool	M00016	Lysine_biosynthesis__aspartate_=__lysine	GH28	-0.605737	136	5.55112e-15	6.66134e-13	8.45191e-13
Supragingival plaque	M00220	Rhamnose_transport_system	GH106	0.64701	115	5.66214e-15	6.79456e-13	8.61461e-13
Stool	M00015	Proline_biosynthesis__glutamate_=__proline	GH16	0.605455	136	5.77316e-15	6.92779e-13	8.77707e-13
Supragingival plaque	M00079	Keratan_sulfate_degradation	PL11	0.646786	115	5.77316e-15	6.92779e-13	8.77063e-13
Buccal mucosa	M00199	Lactose_L-arabinose_transport_system	GH42	0.659998	109	5.88418e-15	7.06102e-13	8.93274e-13
Stool	M00008	Entner-Doudoroff_pathway__glucose-6P_=__glyceraldehyde-3P___pyruvate	GH95	0.605412	136	5.88418e-15	7.06102e-13	8.92619e-13
Stool	M00360	Aminoacyl-tRNA_biosynthesis__prokaryotes	GH105	-0.605412	136	5.88418e-15	7.06102e-13	8.91966e-13
Supragingival plaque	M00220	Rhamnose_transport_system	GH89	0.64659	115	5.88418e-15	7.06102e-13	8.91313e-13
Tongue dorsum	M00168	CAM__Crassulacean_acid_metabolism___dark	GH28	-0.630001	123	5.88418e-15	7.06102e-13	8.90662e-13
Stool	M00178	Ribosome__bacteria	GH88	-0.605275	136	5.9952e-15	7.19425e-13	9.06804e-13
Supragingival plaque	M00061	Uronic_acid_metabolism	GH78	0.646514	115	5.9952e-15	7.19425e-13	9.06142e-13
Stool	M00159	V-type_ATPase__prokaryotes	GH97	-0.605124	136	6.10623e-15	7.32747e-13	9.2225e-13
Supragingival plaque	M00300	Putrescine_transport_system	GH103	0.646407	115	6.10623e-15	7.32747e-13	9.21578e-13
Stool	M00045	Histidine_degradation__histidine_=__N-formiminoglutamate_=__glutamate	GH43	0.60496	136	6.21725e-15	7.4607e-13	9.3765e-13
Stool	M00052	Pyrimidine_ribonucleotide_biosynthesis__UMP_=__UDP_UTP_CDP_CTP	GH15	0.604955	136	6.21725e-15	7.4607e-13	9.36968e-13
Supragingival plaque	M00202	Oligogalacturonide_transport_system	GH63	0.646273	115	6.21725e-15	7.4607e-13	9.36286e-13
Stool	M00016	Lysine_biosynthesis__aspartate_=__lysine	GH97	-0.604846	136	6.32827e-15	7.59393e-13	9.52313e-13
Stool	M00178	Ribosome__bacteria	GH105	-0.604814	136	6.32827e-15	7.59393e-13	9.51621e-13
Supragingival plaque	M00120	Coenzyme_A_biosynthesis__pantothenate_=__CoA	GH109	-0.645841	115	6.55032e-15	7.86038e-13	9.84297e-13
Stool	M00019	Leucine_biosynthesis__pyruvate_=__2-oxoisovalerate_=__leucine	GH28	0.604409	136	6.66134e-15	7.99361e-13	1.00025e-12
Supragingival plaque	M00004	Pentose_phosphate_pathway__Pentose_phosphate_cycle_	GH92	-0.645684	115	6.66134e-15	7.99361e-13	9.99529e-13
Stool	M00126	Tetrahydrofolate_biosynthesis__GTP_=__THF	GH18	0.604318	136	6.77236e-15	8.12683e-13	1.01545e-12
Stool	M00239	Peptides_nickel_transport_system	PL8	-0.604104	136	6.88338e-15	8.26006e-13	1.03135e-12
Supragingival plaque	M00233	Glutamate_transport_system	GH92	-0.645389	115	6.88338e-15	8.26006e-13	1.03061e-12
Stool	M00098	Acylglycerol_degradation	PL12	-0.603975	136	6.99441e-15	8.39329e-13	1.04647e-12
Supragingival plaque	M00061	Uronic_acid_metabolism	GH88	0.64528	115	6.99441e-15	8.39329e-13	1.04572e-12
Supragingival plaque	M00004	Pentose_phosphate_pathway__Pentose_phosphate_cycle_	GH30	-0.645148	115	7.10543e-15	8.52651e-13	1.06155e-12
Supragingival plaque	M00023	Tryptophan_biosynthesis__chorismate_=__tryptophan	GH109	-0.645137	115	7.10543e-15	8.52651e-13	1.06078e-12
Supragingival plaque	M00064	ADP-L-glycero-D-manno-heptose_biosynthesis	GH102	0.645164	115	7.10543e-15	8.52651e-13	1.06002e-12
Tongue dorsum	M00141	C1-unit_interconversion__eukaryotes	GH103	-0.628458	123	7.10543e-15	8.52651e-13	1.05926e-12
Stool	M00144	Complex_I__NADH_dehydrogenase___NADH_dehydrogenase_I	GH3	0.603751	136	7.21645e-15	8.65974e-13	1.07503e-12
Stool	M00193	Putative_spermidine_putrescine_transport_system	PL15	-0.603696	136	7.32747e-15	8.79297e-13	1.09079e-12
Buccal mucosa	M00136	GABA_biosynthesis__prokaryotes__putrescine_=__GABA	GH27	0.658146	109	7.43849e-15	8.92619e-13	1.10652e-12
Stool	M00199	Lactose_L-arabinose_transport_system	GH95	-0.603565	136	7.43849e-15	8.92619e-13	1.10572e-12
Supragingival plaque	M00233	Glutamate_transport_system	GH24	-0.644639	115	7.54952e-15	9.05942e-13	1.12142e-12
Stool	M00245	Cobalt_transport_system	GH101	0.603336	136	7.66054e-15	9.19265e-13	1.1371e-12
Tongue dorsum	M00141	C1-unit_interconversion__eukaryotes	GH51	0.627891	123	7.66054e-15	9.19265e-13	1.13628e-12
Tongue dorsum	M00346	Formaldehyde_assimilation__serine_pathway	GH18	0.627877	123	7.66054e-15	9.19265e-13	1.13547e-12
Stool	M00004	Pentose_phosphate_pathway__Pentose_phosphate_cycle_	GH43	0.603235	136	7.77156e-15	9.32587e-13	1.1511e-12
Supragingival plaque	M00077	Chondroitin_sulfate_degradation	GH78	0.644506	115	7.77156e-15	9.32587e-13	1.15028e-12
Anterior nares	M00231	Octopine_nopaline_transport_system	GH103	0.714252	87	7.99361e-15	9.59233e-13	1.1823e-12
Anterior nares	M00321	Bicarbonate_transport_system	GH54	0.714315	87	7.99361e-15	9.59233e-13	1.18146e-12
Supragingival plaque	M00006	Pentose_phosphate_pathway__oxidative_phase__glucose_6P_=__ribulose_5P	GH18	-0.644188	115	7.99361e-15	9.59233e-13	1.18061e-12
Tongue dorsum	M00061	Uronic_acid_metabolism	PL8	0.627602	123	7.99361e-15	9.59233e-13	1.17977e-12
Stool	M00206	Cellobiose_transport_system	GH97	-0.602732	136	8.21565e-15	9.85878e-13	1.21168e-12
Supragingival plaque	M00304	PTS_system__fructose-specific_II_component	GH57	-0.644025	115	8.21565e-15	9.85878e-13	1.21082e-12
Supragingival plaque	M00360	Aminoacyl-tRNA_biosynthesis__prokaryotes	GH105	0.644034	115	8.21565e-15	9.85878e-13	1.20996e-12
Stool	M00193	Putative_spermidine_putrescine_transport_system	PL8	-0.602635	136	8.32667e-15	9.99201e-13	1.22543e-12
Stool	M00194	Maltose_maltodextrin_transport_system	GH106	-0.60268	136	8.32667e-15	9.99201e-13	1.22456e-12
Supragingival plaque	M00077	Chondroitin_sulfate_degradation	GH28	0.643931	115	8.32667e-15	9.99201e-13	1.2237e-12
Supragingival plaque	M00159	V-type_ATPase__prokaryotes	GH106	0.643898	115	8.32667e-15	9.99201e-13	1.22283e-12
Supragingival plaque	M00233	Glutamate_transport_system	GH116	-0.643928	115	8.32667e-15	9.99201e-13	1.22196e-12
Stool	M00202	Oligogalacturonide_transport_system	GH78	-0.602553	136	8.43769e-15	1.01252e-12	1.23738e-12
Stool	M00015	Proline_biosynthesis__glutamate_=__proline	GH88	0.6025	136	8.54872e-15	1.02585e-12	1.25277e-12
Stool	M00127	Thiamine_biosynthesis__AIR_=__thiamine-P_thiamine-2P	GH20	-0.602469	136	8.54872e-15	1.02585e-12	1.25189e-12
Tongue dorsum	M00048	Inosine_monophosphate_biosynthesis__PRPP___glutamine_=__IMP	GH1	0.62704	123	8.54872e-15	1.02585e-12	1.251e-12
Stool	M00045	Histidine_degradation__histidine_=__N-formiminoglutamate_=__glutamate	GH15	0.602308	136	8.65974e-15	1.03917e-12	1.26635e-12
Stool	M00201	alpha-Glucoside_transport_system	GH111	0.602364	136	8.65974e-15	1.03917e-12	1.26546e-12
Supragingival plaque	M00079	Keratan_sulfate_degradation	GH53	0.643617	115	8.65974e-15	1.03917e-12	1.26457e-12
Stool	M00124	Pyridoxal_biosynthesis__erythrose-4P_=__pyridoxal-5P	GH4	-0.602275	136	8.77076e-15	1.05249e-12	1.27988e-12
Stool	M00326	RTX_toxin_transport_system	GH28	-0.602244	136	8.77076e-15	1.05249e-12	1.27897e-12
Tongue dorsum	M00207	Multiple_sugar_transport_system	GH65	-0.626856	123	8.77076e-15	1.05249e-12	1.27807e-12
Stool	M00098	Acylglycerol_degradation	GH66	-0.602033	136	8.99281e-15	1.07914e-12	1.30951e-12
Stool	M00183	RNA_polymerase__bacteria	GH95	-0.601969	136	9.10383e-15	1.09246e-12	1.32474e-12
Supragingival plaque	M00133	Polyamine_biosynthesis__arginine_=__agmatine_=__putrescine_=__spermidine	GH92	0.643231	115	9.10383e-15	1.09246e-12	1.32381e-12
Stool	M00004	Pentose_phosphate_pathway__Pentose_phosphate_cycle_	GH27	0.601827	136	9.21485e-15	1.10578e-12	1.33902e-12
Stool	M00098	Acylglycerol_degradation	GH111	0.601853	136	9.21485e-15	1.10578e-12	1.33808e-12
Tongue dorsum	M00324	Dipeptide_transport_system	GH23	0.626483	123	9.21485e-15	1.10578e-12	1.33714e-12
Buccal mucosa	M00136	GABA_biosynthesis__prokaryotes__putrescine_=__GABA	GH18	0.656302	109	9.4369e-15	1.13243e-12	1.3684e-12
Tongue dorsum	M00049	Adenine_nucleotide_biosynthesis__IMP_=__ADP_dADP_ATP_dATP	GH42	0.626233	123	9.4369e-15	1.13243e-12	1.36745e-12
Stool	M00119	Pantothenate_biosynthesis__valine_L-aspartate_=__pantothenate	GH78	0.601631	136	9.54792e-15	1.14575e-12	1.38257e-12
Stool	M00206	Cellobiose_transport_system	GH43	-0.601388	136	9.76996e-15	1.1724e-12	1.41373e-12
Tongue dorsum	M00077	Chondroitin_sulfate_degradation	PL1	0.625998	123	9.76996e-15	1.1724e-12	1.41274e-12
Stool	M00204	Trehalose_maltose_transport_system	GH94	0.601295	136	9.88098e-15	1.18572e-12	1.4278e-12
Stool	M00201	alpha-Glucoside_transport_system	GH59	0.601177	136	1.0103e-14	1.21236e-12	1.45886e-12
Supragingival plaque	M00133	Polyamine_biosynthesis__arginine_=__agmatine_=__putrescine_=__spermidine	GH28	0.642353	115	1.0103e-14	1.21236e-12	1.45785e-12
Supragingival plaque	M00222	Phosphate_transport_system	GH51	-0.642365	115	1.0103e-14	1.21236e-12	1.45683e-12
Tongue dorsum	M00051	Uridine_monophosphate_biosynthesis__glutamine____PRPP__=__UMP	GH35	-0.625716	123	1.0103e-14	1.21236e-12	1.45582e-12
Stool	M00127	Thiamine_biosynthesis__AIR_=__thiamine-P_thiamine-2P	GH89	-0.601031	136	1.02141e-14	1.22569e-12	1.4708e-12
Stool	M00077	Chondroitin_sulfate_degradation	GH97	0.601003	136	1.03251e-14	1.23901e-12	1.48575e-12
Stool	M00124	Pyridoxal_biosynthesis__erythrose-4P_=__pyridoxal-5P	GH2	0.600887	136	1.04361e-14	1.25233e-12	1.50068e-12
Stool	M00124	Pyridoxal_biosynthesis__erythrose-4P_=__pyridoxal-5P	GH15	0.600882	136	1.04361e-14	1.25233e-12	1.49964e-12
Supragingival plaque	M00176	Sulfur_reduction__sulfate_=__H2S	GH78	0.642085	115	1.04361e-14	1.25233e-12	1.4986e-12
Tongue dorsum	M00051	Uridine_monophosphate_biosynthesis__glutamine____PRPP__=__UMP	GH57	0.625433	123	1.04361e-14	1.25233e-12	1.49756e-12
Stool	M00239	Peptides_nickel_transport_system	GH35	-0.60083	136	1.05471e-14	1.26565e-12	1.51244e-12
Stool	M00361	Nucleotide_sugar_biosynthesis__eukaryotes	GH39	0.600827	136	1.05471e-14	1.26565e-12	1.5114e-12
Stool	M00028	Ornithine_biosynthesis__glutamate_=__ornithine	GH113	0.600701	136	1.06581e-14	1.27898e-12	1.52625e-12
Stool	M00159	V-type_ATPase__prokaryotes	GH57	-0.600614	136	1.07692e-14	1.2923e-12	1.54109e-12
Supragingival plaque	M00004	Pentose_phosphate_pathway__Pentose_phosphate_cycle_	GH18	-0.641836	115	1.07692e-14	1.2923e-12	1.54003e-12
Stool	M00022	Shikimate_pathway__phosphoenolpyruvate___erythrose-4P_=__chorismate	PL1	-0.600529	136	1.08802e-14	1.30562e-12	1.55482e-12
Stool	M00077	Chondroitin_sulfate_degradation	GH59	-0.600591	136	1.08802e-14	1.30562e-12	1.55375e-12
Stool	M00359	Aminoacyl-tRNA_biosynthesis__eukaryotes	PL10	-0.600531	136	1.08802e-14	1.30562e-12	1.55268e-12
Stool	M00061	Uronic_acid_metabolism	GH32	0.600391	136	1.11022e-14	1.33227e-12	1.58327e-12
Stool	M00199	Lactose_L-arabinose_transport_system	GH97	-0.600428	136	1.11022e-14	1.33227e-12	1.58218e-12
Stool	M00045	Histidine_degradation__histidine_=__N-formiminoglutamate_=__glutamate	GH35	0.60025	136	1.13243e-14	1.35891e-12	1.61272e-12
Supragingival plaque	M00079	Keratan_sulfate_degradation	GH78	0.641465	115	1.13243e-14	1.35891e-12	1.61162e-12
Stool	M00197	Putative_sugar_transport_system	GH97	-0.599991	136	1.16573e-14	1.39888e-12	1.65787e-12
Supragingival plaque	M00321	Bicarbonate_transport_system	GH43	0.641212	115	1.16573e-14	1.39888e-12	1.65673e-12
Stool	M00004	Pentose_phosphate_pathway__Pentose_phosphate_cycle_	GH115	0.599934	136	1.17684e-14	1.4122e-12	1.67137e-12
Stool	M00077	Chondroitin_sulfate_degradation	GH15	0.59994	136	1.17684e-14	1.4122e-12	1.67023e-12
Stool	M00193	Putative_spermidine_putrescine_transport_system	GH111	0.599972	136	1.17684e-14	1.4122e-12	1.66908e-12
Buccal mucosa	M00077	Chondroitin_sulfate_degradation	GH27	0.654422	109	1.18794e-14	1.42553e-12	1.68367e-12
Supragingival plaque	M00133	Polyamine_biosynthesis__arginine_=__agmatine_=__putrescine_=__spermidine	GH27	0.641082	115	1.18794e-14	1.42553e-12	1.68252e-12
Stool	M00003	Gluconeogenesis__oxaloacetate_=__fructose-6P	GH42	-0.599808	136	1.19904e-14	1.43885e-12	1.69708e-12
Supragingival plaque	M00006	Pentose_phosphate_pathway__oxidative_phase__glucose_6P_=__ribulose_5P	GH110	-0.641022	115	1.19904e-14	1.43885e-12	1.69592e-12
Tongue dorsum	M00156	Complex_IV__Cytochrome_c_oxidase___cytochrome_c_oxidase__cbb3-type	GH1	-0.62433	123	1.19904e-14	1.43885e-12	1.69476e-12
Stool	M00300	Putrescine_transport_system	GH31	-0.599711	136	1.21014e-14	1.45217e-12	1.70929e-12
Supragingival plaque	M00023	Tryptophan_biosynthesis__chorismate_=__tryptophan	GH88	-0.640953	115	1.21014e-14	1.45217e-12	1.70812e-12
Buccal mucosa	M00136	GABA_biosynthesis__prokaryotes__putrescine_=__GABA	GH97	0.654146	109	1.23235e-14	1.47882e-12	1.73829e-12
Stool	M00098	Acylglycerol_degradation	GH10	-0.599584	136	1.23235e-14	1.47882e-12	1.7371e-12
Tongue dorsum	M00077	Chondroitin_sulfate_degradation	GH57	0.624127	123	1.23235e-14	1.47882e-12	1.73592e-12
Tongue dorsum	M00050	Guanine_nucleotide_biosynthesis__IMP_=__GDP_dGDP_GTP_dGTP	GH103	-0.624063	123	1.24345e-14	1.49214e-12	1.75037e-12
Stool	M00061	Uronic_acid_metabolism	GH2	0.599392	136	1.26565e-14	1.51879e-12	1.7804e-12
Supragingival plaque	M00276	PTS_system__mannose-specific_II_component	GH66	-0.640534	115	1.26565e-14	1.51879e-12	1.7792e-12
Tongue dorsum	M00239	Peptides_nickel_transport_system	GH1	0.623951	123	1.26565e-14	1.51879e-12	1.77799e-12
Tongue dorsum	M00307	Pyruvate_oxidation__pyruvate_=__acetyl-CoA	GH27	-0.623853	123	1.27676e-14	1.53211e-12	1.79238e-12
Stool	M00006	Pentose_phosphate_pathway__oxidative_phase__glucose_6P_=__ribulose_5P	GH76	0.599273	136	1.28786e-14	1.54543e-12	1.80674e-12
Posterior fornix	M00239	Peptides_nickel_transport_system	GH42	0.835673	52	1.29896e-14	1.55875e-12	1.82108e-12
Stool	M00079	Keratan_sulfate_degradation	PL8	0.599145	136	1.29896e-14	1.55875e-12	1.81984e-12
Supragingival plaque	M00023	Tryptophan_biosynthesis__chorismate_=__tryptophan	GH5	-0.64037	115	1.29896e-14	1.55875e-12	1.81861e-12
Anterior nares	M00201	alpha-Glucoside_transport_system	GH4	0.710258	87	1.32117e-14	1.5854e-12	1.84846e-12
Supragingival plaque	M00204	Trehalose_maltose_transport_system	GH17	0.640186	115	1.32117e-14	1.5854e-12	1.84721e-12
Stool	M00026	Histidine_biosynthesis__PRPP_=__histidine	GH33	-0.598878	136	1.34337e-14	1.61204e-12	1.87698e-12
Supragingival plaque	M00222	Phosphate_transport_system	GH108	-0.640113	115	1.34337e-14	1.61204e-12	1.87572e-12
Buccal mucosa	M00150	Complex_II__succinate_dehydrogenase___fumarate_reductase___fumarate_reductase	GH103	0.653266	109	1.37668e-14	1.65201e-12	1.92093e-12
Stool	M00016	Lysine_biosynthesis__aspartate_=__lysine	GH1	0.598686	136	1.37668e-14	1.65201e-12	1.91964e-12
Stool	M00201	alpha-Glucoside_transport_system	GH106	-0.598563	136	1.39888e-14	1.67866e-12	1.94928e-12
Stool	M00098	Acylglycerol_degradation	GH59	0.598524	136	1.40998e-14	1.69198e-12	1.96343e-12
Stool	M00270	PTS_system__trehalose-specific_II_component	GH105	-0.598557	136	1.40998e-14	1.69198e-12	1.96211e-12
Supragingival plaque	M00307	Pyruvate_oxidation__pyruvate_=__acetyl-CoA	GH53	-0.639676	115	1.40998e-14	1.69198e-12	1.96079e-12
Supragingival plaque	M00359	Aminoacyl-tRNA_biosynthesis__eukaryotes	GH114	0.639616	115	1.42109e-14	1.7053e-12	1.97491e-12
Stool	M00194	Maltose_maltodextrin_transport_system	GH39	0.598431	136	1.43219e-14	1.71863e-12	1.98901e-12
Stool	M00207	Multiple_sugar_transport_system	PL10	-0.598391	136	1.43219e-14	1.71863e-12	1.98767e-12
Supragingival plaque	M00120	Coenzyme_A_biosynthesis__pantothenate_=__CoA	GH97	-0.639477	115	1.44329e-14	1.73195e-12	2.00174e-12
Tongue dorsum	M00311	2-oxoglutarate_ferredoxin_oxidoreductase	GH26	0.622906	123	1.44329e-14	1.73195e-12	2.0004e-12
Tongue dorsum	M00319	Manganese_zinc_iron_transport_system	GH102	-0.622825	123	1.45439e-14	1.74527e-12	2.01443e-12
Stool	M00045	Histidine_degradation__histidine_=__N-formiminoglutamate_=__glutamate	GH109	0.598237	136	1.46549e-14	1.75859e-12	2.02845e-12
Stool	M00361	Nucleotide_sugar_biosynthesis__eukaryotes	GH113	0.598159	136	1.4766e-14	1.77192e-12	2.04246e-12
Tongue dorsum	M00311	2-oxoglutarate_ferredoxin_oxidoreductase	GH87	0.622582	123	1.4988e-14	1.79856e-12	2.07179e-12
Stool	M00018	Threonine_biosynthesis__apartate_=__homoserine_=__threonine	PL12	-0.597963	136	1.5099e-14	1.81188e-12	2.08574e-12
Supragingival plaque	M00304	PTS_system__fructose-specific_II_component	GH105	-0.639165	115	1.5099e-14	1.81188e-12	2.08435e-12
Tongue dorsum	M00360	Aminoacyl-tRNA_biosynthesis__prokaryotes	GH57	0.622469	123	1.52101e-14	1.82521e-12	2.09828e-12
Stool	M00206	Cellobiose_transport_system	GH106	-0.597753	136	1.55431e-14	1.86517e-12	2.1428e-12
Supragingival plaque	M00124	Pyridoxal_biosynthesis__erythrose-4P_=__pyridoxal-5P	GH24	0.638897	115	1.55431e-14	1.86517e-12	2.14137e-12
Tongue dorsum	M00175	Nitrogen_fixation__N2_=__ammonia	GH68	0.622239	123	1.56541e-14	1.8785e-12	2.15523e-12
Stool	M00237	Branched-chain_amino_acid_transport_system	GH59	0.597571	136	1.58762e-14	1.90514e-12	2.18435e-12
Tongue dorsum	M00098	Acylglycerol_degradation	GH65	0.622076	123	1.59872e-14	1.91847e-12	2.19817e-12
Stool	M00076	Dermatan_sulfate_degradation	GH78	0.597386	136	1.63203e-14	1.95843e-12	2.24248e-12
Tongue dorsum	M00077	Chondroitin_sulfate_degradation	GH53	0.621775	123	1.65423e-14	1.98508e-12	2.27147e-12
Anterior nares	M00064	ADP-L-glycero-D-manno-heptose_biosynthesis	GH102	0.708386	87	1.66533e-14	1.9984e-12	2.2852e-12
Stool	M00004	Pentose_phosphate_pathway__Pentose_phosphate_cycle_	GH50	0.597198	136	1.66533e-14	1.9984e-12	2.28369e-12
Stool	M00183	RNA_polymerase__bacteria	GH28	-0.597208	136	1.66533e-14	1.9984e-12	2.28217e-12
Supragingival plaque	M00233	Glutamate_transport_system	GH97	-0.638297	115	1.67644e-14	2.01172e-12	2.29588e-12
Tongue dorsum	M00060	Lipopolysaccharide_biosynthesis__KDO2-lipid_A	GH97	0.621647	123	1.68754e-14	2.02505e-12	2.30955e-12
Stool	M00194	Maltose_maltodextrin_transport_system	GH33	-0.597071	136	1.69864e-14	2.03837e-12	2.32321e-12
Stool	M00197	Putative_sugar_transport_system	GH95	-0.597027	136	1.69864e-14	2.03837e-12	2.32168e-12
Stool	M00016	Lysine_biosynthesis__aspartate_=__lysine	GH33	-0.596966	136	1.72085e-14	2.06501e-12	2.35048e-12
Tongue dorsum	M00077	Chondroitin_sulfate_degradation	GH87	0.621432	123	1.73195e-14	2.07834e-12	2.36408e-12
Supragingival plaque	M00360	Aminoacyl-tRNA_biosynthesis__prokaryotes	GH78	0.637984	115	1.74305e-14	2.09166e-12	2.37767e-12
Stool	M00019	Leucine_biosynthesis__pyruvate_=__2-oxoisovalerate_=__leucine	GH109	0.59678	136	1.75415e-14	2.10498e-12	2.39123e-12
Stool	M00119	Pantothenate_biosynthesis__valine_L-aspartate_=__pantothenate	GH2	0.596783	136	1.75415e-14	2.10498e-12	2.38966e-12
Tongue dorsum	M00136	GABA_biosynthesis__prokaryotes__putrescine_=__GABA	GH43	0.621232	123	1.76525e-14	2.11831e-12	2.4032e-12
Anterior nares	M00201	alpha-Glucoside_transport_system	GH33	0.707822	87	1.77636e-14	2.13163e-12	2.41674e-12
Stool	M00123	Biotin_biosynthesis__pimeloyl-CoA_=__biotin	GH115	0.596601	136	1.79856e-14	2.15827e-12	2.44533e-12
Stool	M00207	Multiple_sugar_transport_system	GH15	-0.596611	136	1.79856e-14	2.15827e-12	2.44373e-12
Supragingival plaque	M00304	PTS_system__fructose-specific_II_component	GH4	-0.637731	115	1.79856e-14	2.15827e-12	2.44213e-12
Stool	M00098	Acylglycerol_degradation	GH18	-0.596531	136	1.80966e-14	2.1716e-12	2.45559e-12
Supragingival plaque	M00220	Rhamnose_transport_system	GH105	0.637694	115	1.80966e-14	2.1716e-12	2.45398e-12
Stool	M00019	Leucine_biosynthesis__pyruvate_=__2-oxoisovalerate_=__leucine	GH95	0.596496	136	1.82077e-14	2.18492e-12	2.46743e-12
Supragingival plaque	M00220	Rhamnose_transport_system	GH63	0.637613	115	1.82077e-14	2.18492e-12	2.46582e-12
Tongue dorsum	M00183	RNA_polymerase__bacteria	GH65	-0.621025	123	1.82077e-14	2.18492e-12	2.4642e-12
Stool	M00022	Shikimate_pathway__phosphoenolpyruvate___erythrose-4P_=__chorismate	GH111	0.596474	136	1.83187e-14	2.19824e-12	2.47761e-12
Stool	M00079	Keratan_sulfate_degradation	GH15	0.596396	136	1.84297e-14	2.21156e-12	2.49099e-12
Supragingival plaque	M00036	Leucine_degradation__leucine_=__acetoacetate___acetyl-CoA	GH63	0.637493	115	1.85407e-14	2.22489e-12	2.50436e-12
Supragingival plaque	M00307	Pyruvate_oxidation__pyruvate_=__acetyl-CoA	GH109	-0.637492	115	1.85407e-14	2.22489e-12	2.50273e-12
Stool	M00198	sn-Glycerol_3-phosphate_transport_system	PL1	-0.596308	136	1.86517e-14	2.23821e-12	2.51607e-12
Supragingival plaque	M00004	Pentose_phosphate_pathway__Pentose_phosphate_cycle_	GH88	-0.637416	115	1.86517e-14	2.23821e-12	2.51443e-12
Stool	M00076	Dermatan_sulfate_degradation	GH18	0.5962	136	1.88738e-14	2.26485e-12	2.54272e-12
Stool	M00127	Thiamine_biosynthesis__AIR_=__thiamine-P_thiamine-2P	GH18	-0.59616	136	1.89848e-14	2.27818e-12	2.55601e-12
Stool	M00019	Leucine_biosynthesis__pyruvate_=__2-oxoisovalerate_=__leucine	GH29	0.596107	136	1.90958e-14	2.2915e-12	2.56928e-12
Tongue dorsum	M00175	Nitrogen_fixation__N2_=__ammonia	GH70	0.620613	123	1.90958e-14	2.2915e-12	2.56762e-12
Supragingival plaque	M00124	Pyridoxal_biosynthesis__erythrose-4P_=__pyridoxal-5P	GH109	0.63717	115	1.92069e-14	2.30482e-12	2.58088e-12
Stool	M00237	Branched-chain_amino_acid_transport_system	GH109	-0.595954	136	1.95399e-14	2.34479e-12	2.62392e-12
Stool	M00017	Methionine_biosynthesis__apartate_=__homoserine_=__methionine	GH92	-0.595912	136	1.96509e-14	2.35811e-12	2.63712e-12
Tongue dorsum	M00017	Methionine_biosynthesis__apartate_=__homoserine_=__methionine	GH85	0.620359	123	1.9762e-14	2.37144e-12	2.65031e-12
Tongue dorsum	M00199	Lactose_L-arabinose_transport_system	GH42	0.620344	123	1.9762e-14	2.37144e-12	2.64859e-12
Stool	M00198	sn-Glycerol_3-phosphate_transport_system	GH29	-0.595792	136	1.9873e-14	2.38476e-12	2.66175e-12
Stool	M00015	Proline_biosynthesis__glutamate_=__proline	GH51	0.595704	136	2.0095e-14	2.4114e-12	2.68974e-12
Stool	M00326	RTX_toxin_transport_system	GH115	-0.595717	136	2.0095e-14	2.4114e-12	2.688e-12
Stool	M00175	Nitrogen_fixation__N2_=__ammonia	GH20	-0.595558	136	2.05391e-14	2.4647e-12	2.74564e-12
Stool	M00206	Cellobiose_transport_system	GH92	-0.595548	136	2.05391e-14	2.4647e-12	2.74386e-12
Stool	M00300	Putrescine_transport_system	GH30	-0.595535	136	2.05391e-14	2.4647e-12	2.7421e-12
Stool	M00185	Sulfate_transport_system	GH94	0.59519	136	2.14273e-14	2.57128e-12	2.85883e-12
Stool	M00324	Dipeptide_transport_system	GH92	-0.595192	136	2.14273e-14	2.57128e-12	2.85699e-12
Supragingival plaque	M00046	beta-Alanine_biosynthesis__cytosine___uracil_=__beta-alanine	GH89	0.6363	115	2.14273e-14	2.57128e-12	2.85515e-12
Tongue dorsum	M00123	Biotin_biosynthesis__pimeloyl-CoA_=__biotin	GH35	-0.619637	123	2.15383e-14	2.5846e-12	2.8681e-12
Stool	M00324	Dipeptide_transport_system	GH43	-0.59508	136	2.17604e-14	2.61124e-12	2.89581e-12
Stool	M00198	sn-Glycerol_3-phosphate_transport_system	GH33	-0.59504	136	2.18714e-14	2.62457e-12	2.90871e-12
Stool	M00197	Putative_sugar_transport_system	GH20	-0.59495	136	2.20934e-14	2.65121e-12	2.93635e-12
Supragingival plaque	M00307	Pyruvate_oxidation__pyruvate_=__acetyl-CoA	GH5	-0.636032	115	2.20934e-14	2.65121e-12	2.93447e-12
Stool	M00197	Putative_sugar_transport_system	GH88	-0.59491	136	2.22045e-14	2.66454e-12	2.94733e-12
Stool	M00175	Nitrogen_fixation__N2_=__ammonia	GH89	-0.594862	136	2.23155e-14	2.67786e-12	2.96017e-12
Stool	M00008	Entner-Doudoroff_pathway__glucose-6P_=__glyceraldehyde-3P___pyruvate	PL12	0.594831	136	2.24265e-14	2.69118e-12	2.97299e-12
Stool	M00199	Lactose_L-arabinose_transport_system	GH28	-0.594802	136	2.25375e-14	2.7045e-12	2.98579e-12
Tongue dorsum	M00064	ADP-L-glycero-D-manno-heptose_biosynthesis	GH23	0.619266	123	2.25375e-14	2.7045e-12	2.98388e-12
Stool	M00194	Maltose_maltodextrin_transport_system	GH28	-0.594606	136	2.30926e-14	2.77112e-12	3.05542e-12
Stool	M00199	Lactose_L-arabinose_transport_system	GH88	-0.59459	136	2.30926e-14	2.77112e-12	3.05347e-12
Stool	M00119	Pantothenate_biosynthesis__valine_L-aspartate_=__pantothenate	PL10	0.594556	136	2.32037e-14	2.78444e-12	3.06621e-12
Stool	M00175	Nitrogen_fixation__N2_=__ammonia	GH59	0.59457	136	2.32037e-14	2.78444e-12	3.06425e-12
Tongue dorsum	M00319	Manganese_zinc_iron_transport_system	GH18	0.619049	123	2.32037e-14	2.78444e-12	3.0623e-12
Tongue dorsum	M00229	Arginine_transport_system	GH23	0.618899	123	2.36478e-14	2.83773e-12	3.11892e-12
Supragingival plaque	M00126	Tetrahydrofolate_biosynthesis__GTP_=__THF	GH116	0.635391	115	2.38698e-14	2.86438e-12	3.14619e-12
Anterior nares	M00206	Cellobiose_transport_system	GH4	0.705358	87	2.39808e-14	2.8777e-12	3.15881e-12
Stool	M00119	Pantothenate_biosynthesis__valine_L-aspartate_=__pantothenate	GH105	0.5943	136	2.39808e-14	2.8777e-12	3.15681e-12
Supragingival plaque	M00348	Glutathione_transport_system	GH88	0.635267	115	2.43139e-14	2.91767e-12	3.19862e-12
Tongue dorsum	M00173	Reductive_citric_acid_cycle__Arnon-Buchanan_cycle_	GH76	-0.61867	123	2.43139e-14	2.91767e-12	3.19659e-12
Stool	M00239	Peptides_nickel_transport_system	PL10	-0.593983	136	2.498e-14	2.9976e-12	3.28208e-12
Stool	M00199	Lactose_L-arabinose_transport_system	GH33	-0.593781	136	2.55351e-14	3.06422e-12	3.35289e-12
Tongue dorsum	M00004	Pentose_phosphate_pathway__Pentose_phosphate_cycle_	GH43	-0.618277	123	2.55351e-14	3.06422e-12	3.35076e-12
Tongue dorsum	M00015	Proline_biosynthesis__glutamate_=__proline	GH16	-0.618251	123	2.55351e-14	3.06422e-12	3.34864e-12
Stool	M00183	RNA_polymerase__bacteria	GH78	-0.593734	136	2.57572e-14	3.09086e-12	3.37563e-12
Supragingival plaque	M00172	C4-dicarboxylic_acid_cycle__NADP__-malic_enzyme_type	GH114	0.634782	115	2.57572e-14	3.09086e-12	3.37349e-12
Stool	M00178	Ribosome__bacteria	GH92	-0.593688	136	2.58682e-14	3.10418e-12	3.38589e-12
Stool	M00193	Putative_spermidine_putrescine_transport_system	GH18	-0.593679	136	2.58682e-14	3.10418e-12	3.38375e-12
Supragingival plaque	M00300	Putrescine_transport_system	GH102	0.634758	115	2.58682e-14	3.10418e-12	3.38161e-12
Stool	M00124	Pyridoxal_biosynthesis__erythrose-4P_=__pyridoxal-5P	GH106	0.593576	136	2.62013e-14	3.14415e-12	3.423e-12
Stool	M00207	Multiple_sugar_transport_system	GH59	0.593511	136	2.64233e-14	3.1708e-12	3.44982e-12
Stool	M00006	Pentose_phosphate_pathway__oxidative_phase__glucose_6P_=__ribulose_5P	PL9	0.593473	136	2.65343e-14	3.18412e-12	3.46213e-12
Stool	M00183	RNA_polymerase__bacteria	GH29	-0.593293	136	2.72005e-14	3.26406e-12	3.54682e-12
Tongue dorsum	M00175	Nitrogen_fixation__N2_=__ammonia	GH103	-0.61768	123	2.74225e-14	3.2907e-12	3.57352e-12
Stool	M00017	Methionine_biosynthesis__apartate_=__homoserine_=__methionine	GH88	-0.593159	136	2.76446e-14	3.31735e-12	3.6002e-12
Stool	M00115	NAD_biosynthesis__aspartate_=__NAD	GH57	0.593113	136	2.77556e-14	3.33067e-12	3.61238e-12
Supragingival plaque	M00150	Complex_II__succinate_dehydrogenase___fumarate_reductase___fumarate_reductase	GH102	0.634186	115	2.77556e-14	3.33067e-12	3.61011e-12
Stool	M00127	Thiamine_biosynthesis__AIR_=__thiamine-P_thiamine-2P	PL12	-0.593085	136	2.78666e-14	3.34399e-12	3.62227e-12
Stool	M00077	Chondroitin_sulfate_degradation	GH113	-0.592992	136	2.81997e-14	3.38396e-12	3.66327e-12
Buccal mucosa	M00077	Chondroitin_sulfate_degradation	GH109	0.647335	109	2.83107e-14	3.39728e-12	3.67539e-12
Supragingival plaque	M00360	Aminoacyl-tRNA_biosynthesis__prokaryotes	GH5	0.633986	115	2.84217e-14	3.41061e-12	3.68748e-12
Stool	M00193	Putative_spermidine_putrescine_transport_system	GH30	-0.592772	136	2.89768e-14	3.47722e-12	3.75715e-12
Supragingival plaque	M00222	Phosphate_transport_system	GH28	-0.633724	115	2.93099e-14	3.51719e-12	3.79796e-12
Stool	M00008	Entner-Doudoroff_pathway__glucose-6P_=__glyceraldehyde-3P___pyruvate	GH43	0.592632	136	2.95319e-14	3.54383e-12	3.82433e-12
Stool	M00026	Histidine_biosynthesis__PRPP_=__histidine	GH20	-0.592636	136	2.95319e-14	3.54383e-12	3.82194e-12
Stool	M00079	Keratan_sulfate_degradation	GH113	-0.592493	136	2.9976e-14	3.59712e-12	3.877e-12
Stool	M00124	Pyridoxal_biosynthesis__erythrose-4P_=__pyridoxal-5P	GH97	0.592477	136	3.0087e-14	3.61045e-12	3.88892e-12
Stool	M00019	Leucine_biosynthesis__pyruvate_=__2-oxoisovalerate_=__leucine	GH97	0.592317	136	3.06422e-14	3.67706e-12	3.95822e-12
Supragingival plaque	M00222	Phosphate_transport_system	GH110	-0.633365	115	3.06422e-14	3.67706e-12	3.95575e-12
Stool	M00300	Putrescine_transport_system	PL8	-0.592306	136	3.07532e-14	3.69038e-12	3.9676e-12
Tongue dorsum	M00168	CAM__Crassulacean_acid_metabolism___dark	GH105	-0.616726	123	3.08642e-14	3.7037e-12	3.97944e-12
Stool	M00270	PTS_system__trehalose-specific_II_component	GH92	-0.592248	136	3.09752e-14	3.71703e-12	3.99127e-12
Supragingival plaque	M00006	Pentose_phosphate_pathway__oxidative_phase__glucose_6P_=__ribulose_5P	GH92	-0.633236	115	3.10862e-14	3.73035e-12	4.00308e-12
Stool	M00239	Peptides_nickel_transport_system	GH67	-0.592136	136	3.14193e-14	3.77032e-12	4.04346e-12
Stool	M00119	Pantothenate_biosynthesis__valine_L-aspartate_=__pantothenate	GH97	0.592085	136	3.15303e-14	3.78364e-12	4.05523e-12
Tongue dorsum	M00021	Cysteine_biosynthesis__serine_=__cysteine	PL7	-0.616518	123	3.16414e-14	3.79696e-12	4.06699e-12
Tongue dorsum	M00237	Branched-chain_amino_acid_transport_system	GH25	0.616469	123	3.17524e-14	3.81029e-12	4.07873e-12
Stool	M00126	Tetrahydrofolate_biosynthesis__GTP_=__THF	GH62	0.591997	136	3.19744e-14	3.83693e-12	4.1047e-12
Supragingival plaque	M00036	Leucine_degradation__leucine_=__acetoacetate___acetyl-CoA	GH109	0.632958	115	3.21965e-14	3.86358e-12	4.13065e-12
Supragingival plaque	M00276	PTS_system__mannose-specific_II_component	GH16	-0.632945	115	3.21965e-14	3.86358e-12	4.12809e-12
Stool	M00127	Thiamine_biosynthesis__AIR_=__thiamine-P_thiamine-2P	GH33	-0.591904	136	3.23075e-14	3.8769e-12	4.13976e-12
Stool	M00201	alpha-Glucoside_transport_system	GH95	-0.59191	136	3.23075e-14	3.8769e-12	4.1372e-12
Tongue dorsum	M00239	Peptides_nickel_transport_system	GH85	0.616312	123	3.24185e-14	3.89022e-12	4.14885e-12
Tongue dorsum	M00121	Heme_biosynthesis__glutamate_=__protoheme_siroheme	GH103	0.616289	123	3.25295e-14	3.90354e-12	4.16048e-12
Stool	M00079	Keratan_sulfate_degradation	GH97	0.591793	136	3.27516e-14	3.93019e-12	4.1863e-12
Stool	M00087	beta-Oxidation	PL10	-0.591738	136	3.29736e-14	3.95683e-12	4.21208e-12
Tongue dorsum	M00051	Uridine_monophosphate_biosynthesis__glutamine____PRPP__=__UMP	GH4	0.616164	123	3.29736e-14	3.95683e-12	4.20948e-12
Stool	M00119	Pantothenate_biosynthesis__valine_L-aspartate_=__pantothenate	GH113	-0.591712	136	3.30846e-14	3.97016e-12	4.22105e-12
Stool	M00359	Aminoacyl-tRNA_biosynthesis__eukaryotes	GH18	-0.591691	136	3.31957e-14	3.98348e-12	4.23262e-12
Supragingival plaque	M00277	PTS_system__N-acetylgalactosamine-specific_II_component	PL12	0.632693	115	3.31957e-14	3.98348e-12	4.23001e-12
Stool	M00326	RTX_toxin_transport_system	GH97	-0.591583	136	3.36398e-14	4.03677e-12	4.28396e-12
Supragingival plaque	M00207	Multiple_sugar_transport_system	GH103	-0.632547	115	3.37508e-14	4.05009e-12	4.29546e-12
Supragingival plaque	M00045	Histidine_degradation__histidine_=__N-formiminoglutamate_=__glutamate	GH43	0.63246	115	3.40838e-14	4.09006e-12	4.33517e-12
Tongue dorsum	M00050	Guanine_nucleotide_biosynthesis__IMP_=__GDP_dGDP_GTP_dGTP	GH111	0.6159	123	3.40838e-14	4.09006e-12	4.33251e-12
Stool	M00239	Peptides_nickel_transport_system	GH30	-0.591304	136	3.475e-14	4.17e-12	4.41449e-12
Stool	M00360	Aminoacyl-tRNA_biosynthesis__prokaryotes	PL10	-0.59127	136	3.4972e-14	4.19664e-12	4.43996e-12
Stool	M00006	Pentose_phosphate_pathway__oxidative_phase__glucose_6P_=__ribulose_5P	GH62	0.591136	136	3.55271e-14	4.26326e-12	4.50767e-12
Stool	M00183	RNA_polymerase__bacteria	GH43	-0.591117	136	3.56382e-14	4.27658e-12	4.519e-12
Supragingival plaque	M00304	PTS_system__fructose-specific_II_component	GH27	-0.632089	115	3.57492e-14	4.2899e-12	4.5303e-12
Tongue dorsum	M00021	Cysteine_biosynthesis__serine_=__cysteine	GH8	0.615497	123	3.57492e-14	4.2899e-12	4.52753e-12
Supragingival plaque	M00278	PTS_system__sorbose-specific_II_component	GH105	0.632046	115	3.58602e-14	4.30322e-12	4.53881e-12
Tongue dorsum	M00270	PTS_system__trehalose-specific_II_component	GH1	0.615485	123	3.58602e-14	4.30322e-12	4.53604e-12
Stool	M00121	Heme_biosynthesis__glutamate_=__protoheme_siroheme	GH102	0.590952	136	3.63043e-14	4.35652e-12	4.58941e-12
Supragingival plaque	M00359	Aminoacyl-tRNA_biosynthesis__eukaryotes	GH24	0.631918	115	3.64153e-14	4.36984e-12	4.60064e-12
Stool	M00001	Glycolysis__Embden-Meyerhof_pathway___glucose_=__pyruvate	GH89	-0.590892	136	3.66374e-14	4.39648e-12	4.62587e-12
Stool	M00159	V-type_ATPase__prokaryotes	GH115	-0.590728	136	3.73035e-14	4.47642e-12	4.70711e-12
Stool	M00119	Pantothenate_biosynthesis__valine_L-aspartate_=__pantothenate	PL15	0.590709	136	3.74145e-14	4.48974e-12	4.71824e-12
Stool	M00144	Complex_I__NADH_dehydrogenase___NADH_dehydrogenase_I	GH57	0.590557	136	3.80806e-14	4.56968e-12	4.79931e-12
Supragingival plaque	M00222	Phosphate_transport_system	GH114	-0.631549	115	3.80806e-14	4.56968e-12	4.7964e-12
Stool	M00204	Trehalose_maltose_transport_system	GH113	0.590541	136	3.81917e-14	4.583e-12	4.80746e-12
Supragingival plaque	M00172	C4-dicarboxylic_acid_cycle__NADP__-malic_enzyme_type	GH43	0.631485	115	3.84137e-14	4.60965e-12	4.83247e-12
Stool	M00270	PTS_system__trehalose-specific_II_component	GH111	0.590395	136	3.88578e-14	4.66294e-12	4.88537e-12
Stool	M00359	Aminoacyl-tRNA_biosynthesis__eukaryotes	GH20	-0.590404	136	3.88578e-14	4.66294e-12	4.88241e-12
Tongue dorsum	M00359	Aminoacyl-tRNA_biosynthesis__eukaryotes	GH26	0.614739	123	3.91909e-14	4.7029e-12	4.92127e-12
Stool	M00008	Entner-Doudoroff_pathway__glucose-6P_=__glyceraldehyde-3P___pyruvate	GH76	0.590142	136	4.00791e-14	4.80949e-12	5.02976e-12
Supragingival plaque	M00276	PTS_system__mannose-specific_II_component	GH92	-0.631108	115	4.01901e-14	4.82281e-12	5.04063e-12
Stool	M00239	Peptides_nickel_transport_system	GH29	-0.590097	136	4.03011e-14	4.83613e-12	5.05149e-12
Supragingival plaque	M00117	Ubiquinone_biosynthesis__prokaryotes__chorismate_=__ubiquinone	GH103	0.631079	115	4.03011e-14	4.83613e-12	5.04844e-12
Stool	M00362	Nucleotide_sugar_biosynthesis__prokaryotes	GH1	0.590077	136	4.04121e-14	4.84945e-12	5.05928e-12
Stool	M00018	Threonine_biosynthesis__apartate_=__homoserine_=__threonine	GH115	-0.590026	136	4.07452e-14	4.88942e-12	5.0979e-12
Supragingival plaque	M00006	Pentose_phosphate_pathway__oxidative_phase__glucose_6P_=__ribulose_5P	PL11	-0.63096	115	4.08562e-14	4.90274e-12	5.1087e-12
Tongue dorsum	M00359	Aminoacyl-tRNA_biosynthesis__eukaryotes	GH109	0.61433	123	4.11893e-14	4.94271e-12	5.14725e-12
Tongue dorsum	M00121	Heme_biosynthesis__glutamate_=__protoheme_siroheme	GH102	0.614154	123	4.20775e-14	5.04929e-12	5.25507e-12
Tongue dorsum	M00277	PTS_system__N-acetylgalactosamine-specific_II_component	GH1	0.614097	123	4.24105e-14	5.08926e-12	5.29346e-12
Supragingival plaque	M00321	Bicarbonate_transport_system	GH27	0.630642	115	4.25215e-14	5.10259e-12	5.30412e-12
Supragingival plaque	M00059	Glycosaminoglycan_biosynthesis__heparan_sulfate_backbone	GH65	-0.630621	115	4.26326e-14	5.11591e-12	5.31478e-12
Anterior nares	M00201	alpha-Glucoside_transport_system	GH3	0.700465	87	4.30767e-14	5.1692e-12	5.36691e-12
Supragingival plaque	M00360	Aminoacyl-tRNA_biosynthesis__prokaryotes	GH109	0.630452	115	4.34097e-14	5.20917e-12	5.40515e-12
Stool	M00098	Acylglycerol_degradation	GH62	-0.589473	136	4.35207e-14	5.22249e-12	5.41571e-12
Supragingival plaque	M00276	PTS_system__mannose-specific_II_component	GH3	-0.63044	115	4.35207e-14	5.22249e-12	5.41246e-12
Supragingival plaque	M00348	Glutathione_transport_system	GH78	0.630333	115	4.40759e-14	5.2891e-12	5.47822e-12
Tongue dorsum	M00193	Putative_spermidine_putrescine_transport_system	GH110	0.613702	123	4.45199e-14	5.34239e-12	5.53008e-12
Supragingival plaque	M00202	Oligogalacturonide_transport_system	GH26	0.630143	115	4.50751e-14	5.40901e-12	5.59569e-12
Supragingival plaque	M00045	Histidine_degradation__histidine_=__N-formiminoglutamate_=__glutamate	GH106	0.62996	115	4.60743e-14	5.52891e-12	5.71631e-12
Stool	M00119	Pantothenate_biosynthesis__valine_L-aspartate_=__pantothenate	GH35	0.588924	136	4.66294e-14	5.59552e-12	5.78171e-12
Tongue dorsum	M00015	Proline_biosynthesis__glutamate_=__proline	GH4	-0.613283	123	4.67404e-14	5.60885e-12	5.79201e-12
Stool	M00326	RTX_toxin_transport_system	GH106	-0.588787	136	4.74065e-14	5.68878e-12	5.87103e-12
Supragingival plaque	M00045	Histidine_degradation__histidine_=__N-formiminoglutamate_=__glutamate	GH51	0.629681	115	4.76286e-14	5.71543e-12	5.89501e-12
Stool	M00206	Cellobiose_transport_system	GH39	0.588572	136	4.86278e-14	5.83533e-12	6.01509e-12
Stool	M00201	alpha-Glucoside_transport_system	GH43	-0.588518	136	4.89608e-14	5.8753e-12	6.05267e-12
Stool	M00237	Branched-chain_amino_acid_transport_system	GH18	-0.588463	136	4.92939e-14	5.91527e-12	6.09021e-12
Stool	M00022	Shikimate_pathway__phosphoenolpyruvate___erythrose-4P_=__chorismate	GH109	-0.588404	136	4.9627e-14	5.95524e-12	6.12771e-12
Supragingival plaque	M00060	Lipopolysaccharide_biosynthesis__KDO2-lipid_A	GH66	0.629334	115	4.9627e-14	5.95524e-12	6.12405e-12
Anterior nares	M00201	alpha-Glucoside_transport_system	GH13	0.69924	87	4.9738e-14	5.96856e-12	6.1341e-12
Supragingival plaque	M00079	Keratan_sulfate_degradation	GH26	0.629308	115	4.9849e-14	5.98188e-12	6.14413e-12
Tongue dorsum	M00319	Manganese_zinc_iron_transport_system	GH103	-0.612732	123	4.996e-14	5.9952e-12	6.15414e-12
Stool	M00198	sn-Glycerol_3-phosphate_transport_system	GH78	-0.588289	136	5.04041e-14	6.0485e-12	6.20516e-12
Stool	M00019	Leucine_biosynthesis__pyruvate_=__2-oxoisovalerate_=__leucine	GH57	0.588197	136	5.09592e-14	6.11511e-12	6.26977e-12
Stool	M00220	Rhamnose_transport_system	GH113	0.588193	136	5.09592e-14	6.11511e-12	6.26604e-12
Stool	M00361	Nucleotide_sugar_biosynthesis__eukaryotes	PL8	-0.588192	136	5.09592e-14	6.11511e-12	6.26233e-12
Stool	M00004	Pentose_phosphate_pathway__Pentose_phosphate_cycle_	GH62	0.588177	136	5.10703e-14	6.12843e-12	6.27226e-12
Tongue dorsum	M00362	Nucleotide_sugar_biosynthesis__prokaryotes	GH4	0.612529	123	5.11813e-14	6.14175e-12	6.28216e-12
Stool	M00199	Lactose_L-arabinose_transport_system	GH89	-0.587975	136	5.22915e-14	6.27498e-12	6.41463e-12
Tongue dorsum	M00194	Maltose_maltodextrin_transport_system	GH103	-0.6123	123	5.26246e-14	6.31495e-12	6.45167e-12
Tongue dorsum	M00064	ADP-L-glycero-D-manno-heptose_biosynthesis	GH65	0.612166	123	5.35127e-14	6.42153e-12	6.55667e-12
Stool	M00198	sn-Glycerol_3-phosphate_transport_system	PL10	-0.587757	136	5.37348e-14	6.44818e-12	6.57999e-12
Stool	M00312	2-oxoisovalerate_ferredoxin_oxidoreductase	GH112	0.587723	136	5.39568e-14	6.47482e-12	6.60327e-12
Stool	M00194	Maltose_maltodextrin_transport_system	GH89	-0.587715	136	5.40679e-14	6.48814e-12	6.61295e-12
Stool	M00008	Entner-Doudoroff_pathway__glucose-6P_=__glyceraldehyde-3P___pyruvate	GH115	0.587655	136	5.44009e-14	6.52811e-12	6.64976e-12
Supragingival plaque	M00027	GABA__gamma-Aminobutyrate__shunt	GH81	0.628504	115	5.4845e-14	6.5814e-12	6.70009e-12
Stool	M00015	Proline_biosynthesis__glutamate_=__proline	GH59	-0.58755	136	5.50671e-14	6.60805e-12	6.72325e-12
Stool	M00199	Lactose_L-arabinose_transport_system	GH111	0.587545	136	5.51781e-14	6.62137e-12	6.73283e-12
Tongue dorsum	M00049	Adenine_nucleotide_biosynthesis__IMP_=__ADP_dADP_ATP_dATP	PL8	0.611854	123	5.55112e-14	6.66134e-12	6.76949e-12
Tongue dorsum	M00277	PTS_system__N-acetylgalactosamine-specific_II_component	PL8	0.611854	123	5.55112e-14	6.66134e-12	6.76551e-12
Stool	M00193	Putative_spermidine_putrescine_transport_system	PL13	-0.587456	136	5.57332e-14	6.68798e-12	6.78857e-12
Stool	M00175	Nitrogen_fixation__N2_=__ammonia	GH92	-0.587409	136	5.60663e-14	6.72795e-12	6.82512e-12
Supragingival plaque	M00366	C10-C20_isoprenoid_biosynthesis__plants	GH92	0.628316	115	5.60663e-14	6.72795e-12	6.82111e-12
Tongue dorsum	M00144	Complex_I__NADH_dehydrogenase___NADH_dehydrogenase_I	GH85	-0.611773	123	5.60663e-14	6.72795e-12	6.81711e-12
Stool	M00193	Putative_spermidine_putrescine_transport_system	GH16	-0.587309	136	5.67324e-14	6.80789e-12	6.89405e-12
Supragingival plaque	M00076	Dermatan_sulfate_degradation	GH51	0.628196	115	5.68434e-14	6.82121e-12	6.90349e-12
Tongue dorsum	M00060	Lipopolysaccharide_biosynthesis__KDO2-lipid_A	GH103	0.611644	123	5.69544e-14	6.83453e-12	6.91292e-12
Buccal mucosa	M00079	Keratan_sulfate_degradation	GH27	0.641448	109	5.70655e-14	6.84786e-12	6.92234e-12
Supragingival plaque	M00222	Phosphate_transport_system	GH116	-0.628156	115	5.71765e-14	6.86118e-12	6.93175e-12
Stool	M00144	Complex_I__NADH_dehydrogenase___NADH_dehydrogenase_I	GH2	0.587236	136	5.72875e-14	6.8745e-12	6.94114e-12
Stool	M00324	Dipeptide_transport_system	GH88	-0.58718	136	5.76206e-14	6.91447e-12	6.97742e-12
Stool	M00197	Putative_sugar_transport_system	GH59	0.58717	136	5.77316e-14	6.92779e-12	6.98677e-12
Supragingival plaque	M00311	2-oxoglutarate_ferredoxin_oxidoreductase	GH4	0.627997	115	5.81757e-14	6.98108e-12	7.03641e-12
Stool	M00193	Putative_spermidine_putrescine_transport_system	GH76	-0.587029	136	5.87308e-14	7.0477e-12	7.0994e-12
Stool	M00018	Threonine_biosynthesis__apartate_=__homoserine_=__threonine	PL13	-0.586873	136	5.9841e-14	7.18092e-12	7.22938e-12
Stool	M00202	Oligogalacturonide_transport_system	GH111	0.586672	136	6.12843e-14	7.35412e-12	7.39943e-12
Supragingival plaque	M00348	Glutathione_transport_system	GH27	0.627549	115	6.13953e-14	7.36744e-12	7.40851e-12
Supragingival plaque	M00036	Leucine_degradation__leucine_=__acetoacetate___acetyl-CoA	GH27	0.627534	115	6.15064e-14	7.38076e-12	7.41759e-12
Tongue dorsum	M00017	Methionine_biosynthesis__apartate_=__homoserine_=__methionine	GH68	0.610994	123	6.16174e-14	7.39409e-12	7.42665e-12
Stool	M00079	Keratan_sulfate_degradation	GH27	0.586586	136	6.19504e-14	7.43405e-12	7.46245e-12
Tongue dorsum	M00021	Cysteine_biosynthesis__serine_=__cysteine	GH38	0.610917	123	6.21725e-14	7.4607e-12	7.48485e-12
Tongue dorsum	M00006	Pentose_phosphate_pathway__oxidative_phase__glucose_6P_=__ribulose_5P	PL8	-0.610879	123	6.23945e-14	7.48734e-12	7.50721e-12
Stool	M00359	Aminoacyl-tRNA_biosynthesis__eukaryotes	GH106	-0.586503	136	6.26166e-14	7.51399e-12	7.52956e-12
Tongue dorsum	M00237	Branched-chain_amino_acid_transport_system	GH70	0.610806	123	6.29496e-14	7.55396e-12	7.5652e-12
Supragingival plaque	M00023	Tryptophan_biosynthesis__chorismate_=__tryptophan	GH57	-0.627319	115	6.30607e-14	7.56728e-12	7.57416e-12
Stool	M00197	Putative_sugar_transport_system	GH105	-0.586436	136	6.31717e-14	7.5806e-12	7.58309e-12
Stool	M00194	Maltose_maltodextrin_transport_system	PL11	-0.586336	136	6.38378e-14	7.66054e-12	7.65861e-12
Supragingival plaque	M00172	C4-dicarboxylic_acid_cycle__NADP__-malic_enzyme_type	GH51	0.627213	115	6.39488e-14	7.67386e-12	7.66749e-12
Tongue dorsum	M00017	Methionine_biosynthesis__apartate_=__homoserine_=__methionine	GH8	0.610685	123	6.39488e-14	7.67386e-12	7.66305e-12
Stool	M00124	Pyridoxal_biosynthesis__erythrose-4P_=__pyridoxal-5P	GH115	0.586091	136	6.58362e-14	7.90035e-12	7.88466e-12
Stool	M00206	Cellobiose_transport_system	GH115	-0.586028	136	6.62803e-14	7.95364e-12	7.93325e-12
Stool	M00359	Aminoacyl-tRNA_biosynthesis__eukaryotes	GH16	-0.585991	136	6.66134e-14	7.99361e-12	7.96852e-12
Stool	M00360	Aminoacyl-tRNA_biosynthesis__prokaryotes	GH18	-0.585972	136	6.67244e-14	8.00693e-12	7.97719e-12
Stool	M00052	Pyrimidine_ribonucleotide_biosynthesis__UMP_=__UDP_UTP_CDP_CTP	GH27	0.585946	136	6.69464e-14	8.03357e-12	7.99911e-12
Anterior nares	M00201	alpha-Glucoside_transport_system	GH2	0.696661	87	6.71685e-14	8.06022e-12	8.02102e-12
Tongue dorsum	M00326	RTX_toxin_transport_system	GH28	0.610214	123	6.76126e-14	8.11351e-12	8.0694e-12
Stool	M00017	Methionine_biosynthesis__apartate_=__homoserine_=__methionine	GH20	-0.585785	136	6.82787e-14	8.19345e-12	8.1442e-12
Supragingival plaque	M00201	alpha-Glucoside_transport_system	GH63	0.626519	115	6.93889e-14	8.32667e-12	8.27186e-12
Supragingival plaque	M00061	Uronic_acid_metabolism	GH114	0.626508	115	6.95e-14	8.34e-12	8.28034e-12
Tongue dorsum	M00237	Branched-chain_amino_acid_transport_system	GH68	0.609967	123	6.9611e-14	8.35332e-12	8.28879e-12
Supragingival plaque	M00222	Phosphate_transport_system	GH92	-0.626403	115	7.02771e-14	8.43325e-12	8.3633e-12
Stool	M00061	Uronic_acid_metabolism	GH4	-0.585524	136	7.04992e-14	8.4599e-12	8.38491e-12
Stool	M00202	Oligogalacturonide_transport_system	GH33	-0.585412	136	7.14984e-14	8.5798e-12	8.49887e-12
Tongue dorsum	M00277	PTS_system__N-acetylgalactosamine-specific_II_component	GH13	0.609696	123	7.19425e-14	8.63309e-12	8.54675e-12
Tongue dorsum	M00197	Putative_sugar_transport_system	GH35	0.60966	123	7.21645e-14	8.65974e-12	8.56821e-12
Stool	M00060	Lipopolysaccharide_biosynthesis__KDO2-lipid_A	GH15	0.585295	136	7.24976e-14	8.69971e-12	8.60283e-12
Tongue dorsum	M00021	Cysteine_biosynthesis__serine_=__cysteine	GH35	0.609612	123	7.26086e-14	8.71303e-12	8.61106e-12
Supragingival plaque	M00235	Arginine_ornithine_transport_system	GH57	0.626094	115	7.29417e-14	8.753e-12	8.64562e-12
Tongue dorsum	M00326	RTX_toxin_transport_system	GH53	0.609541	123	7.32747e-14	8.79297e-12	8.68012e-12
Tongue dorsum	M00079	Keratan_sulfate_degradation	GH109	0.609508	123	7.34968e-14	8.81961e-12	8.70145e-12
Supragingival plaque	M00359	Aminoacyl-tRNA_biosynthesis__eukaryotes	GH88	0.626015	115	7.36078e-14	8.83293e-12	8.70961e-12
Stool	M00197	Putative_sugar_transport_system	GH43	-0.58516	136	7.37188e-14	8.84626e-12	8.71776e-12
Tongue dorsum	M00125	Riboflavin_biosynthesis__GTP_=__riboflavin_FMN_FAD	GH30	0.609474	123	7.38298e-14	8.85958e-12	8.72591e-12
Supragingival plaque	M00120	Coenzyme_A_biosynthesis__pantothenate_=__CoA	GH27	-0.625968	115	7.40519e-14	8.88623e-12	8.74716e-12
Buccal mucosa	M00079	Keratan_sulfate_degradation	GH57	0.639187	109	7.4496e-14	8.93952e-12	8.79461e-12
Anterior nares	M00124	Pyridoxal_biosynthesis__erythrose-4P_=__pyridoxal-5P	GH103	0.695769	87	7.4607e-14	8.95284e-12	8.80269e-12
Tongue dorsum	M00326	RTX_toxin_transport_system	GH88	0.609318	123	7.51621e-14	9.01945e-12	8.86314e-12
Supragingival plaque	M00172	C4-dicarboxylic_acid_cycle__NADP__-malic_enzyme_type	GH116	0.625816	115	7.53841e-14	9.0461e-12	8.88425e-12
Stool	M00199	Lactose_L-arabinose_transport_system	GH2	-0.584883	136	7.61613e-14	9.13936e-12	8.97074e-12
Buccal mucosa	M00061	Uronic_acid_metabolism	GH105	0.638972	109	7.63833e-14	9.166e-12	8.99178e-12
Tongue dorsum	M00151	Complex_III__Cytochrome_bc1_complex_	GH1	-0.609151	123	7.67164e-14	9.20597e-12	9.02586e-12
Tongue dorsum	M00176	Sulfur_reduction__sulfate_=__H2S	GH111	0.609148	123	7.67164e-14	9.20597e-12	9.02073e-12
Supragingival plaque	M00159	V-type_ATPase__prokaryotes	GH63	0.625565	115	7.76046e-14	9.31255e-12	9.11999e-12
Supragingival plaque	M00359	Aminoacyl-tRNA_biosynthesis__eukaryotes	GH30	0.62552	115	7.80487e-14	9.36584e-12	9.16698e-12
Stool	M00076	Dermatan_sulfate_degradation	GH50	0.584663	136	7.82707e-14	9.39249e-12	9.18784e-12
Tongue dorsum	M00197	Putative_sugar_transport_system	GH110	-0.608955	123	7.84928e-14	9.41913e-12	9.2087e-12
Stool	M00183	RNA_polymerase__bacteria	PL8	-0.584621	136	7.86038e-14	9.43245e-12	9.2165e-12
Stool	M00326	RTX_toxin_transport_system	GH111	0.584583	136	7.89369e-14	9.47242e-12	9.25031e-12
Tongue dorsum	M00299	Spermidine_putrescine_transport_system	GH38	0.608887	123	7.91589e-14	9.49907e-12	9.27108e-12
Stool	M00185	Sulfate_transport_system	GH111	0.584474	136	8.00471e-14	9.60565e-12	9.36981e-12
Stool	M00199	Lactose_L-arabinose_transport_system	GH20	-0.584473	136	8.00471e-14	9.60565e-12	9.36452e-12
Supragingival plaque	M00311	2-oxoglutarate_ferredoxin_oxidoreductase	GH62	0.625306	115	8.00471e-14	9.60565e-12	9.35923e-12
Stool	M00018	Threonine_biosynthesis__apartate_=__homoserine_=__threonine	GH29	-0.584457	136	8.01581e-14	9.61897e-12	9.36692e-12
Stool	M00359	Aminoacyl-tRNA_biosynthesis__eukaryotes	GH88	-0.584405	136	8.07132e-14	9.68559e-12	9.42646e-12
Tongue dorsum	M00175	Nitrogen_fixation__N2_=__ammonia	GH102	-0.608696	123	8.09353e-14	9.71223e-12	9.44707e-12
Tongue dorsum	M00326	RTX_toxin_transport_system	GH105	0.608681	123	8.10463e-14	9.72555e-12	9.4547e-12
Stool	M00076	Dermatan_sulfate_degradation	PL8	0.584341	136	8.12683e-14	9.7522e-12	9.47526e-12
Supragingival plaque	M00124	Pyridoxal_biosynthesis__erythrose-4P_=__pyridoxal-5P	GH88	0.62516	115	8.13793e-14	9.76552e-12	9.48286e-12
Stool	M00060	Lipopolysaccharide_biosynthesis__KDO2-lipid_A	GH57	0.584311	136	8.16014e-14	9.79217e-12	9.5034e-12
Stool	M00016	Lysine_biosynthesis__aspartate_=__lysine	GH106	-0.584235	136	8.23785e-14	9.88543e-12	9.58851e-12
Supragingival plaque	M00159	V-type_ATPase__prokaryotes	GH43	0.625039	115	8.26006e-14	9.91207e-12	9.60896e-12
Stool	M00018	Threonine_biosynthesis__apartate_=__homoserine_=__threonine	GH15	-0.584104	136	8.37108e-14	1.00453e-11	9.73264e-12
Stool	M00004	Pentose_phosphate_pathway__Pentose_phosphate_cycle_	GH42	0.58401	136	8.4599e-14	1.01519e-11	9.83038e-12
Anterior nares	M00058	Glycosaminoglycan_biosynthesis__chondroitin_sulfate_backbone	GH79	0.694666	87	8.471e-14	1.01652e-11	9.83776e-12
Anterior nares	M00220	Rhamnose_transport_system	PL4	0.694666	87	8.471e-14	1.01652e-11	9.83225e-12
Anterior nares	M00346	Formaldehyde_assimilation__serine_pathway	PL4	0.694666	87	8.471e-14	1.01652e-11	9.82674e-12
Supragingival plaque	M00307	Pyruvate_oxidation__pyruvate_=__acetyl-CoA	GH67	-0.624812	115	8.4821e-14	1.01785e-11	9.83411e-12
Stool	M00175	Nitrogen_fixation__N2_=__ammonia	GH1	0.583969	136	8.50431e-14	1.02052e-11	9.85434e-12
Stool	M00198	sn-Glycerol_3-phosphate_transport_system	GH109	-0.583932	136	8.53762e-14	1.02451e-11	9.8874e-12
Stool	M00324	Dipeptide_transport_system	GH28	-0.583926	136	8.54872e-14	1.02585e-11	9.89473e-12
Stool	M00077	Chondroitin_sulfate_degradation	GH27	0.583798	136	8.68194e-14	1.04183e-11	1.00433e-11
Stool	M00076	Dermatan_sulfate_degradation	GH16	0.583734	136	8.74856e-14	1.04983e-11	1.01147e-11
Stool	M00008	Entner-Doudoroff_pathway__glucose-6P_=__glyceraldehyde-3P___pyruvate	PL1	0.583669	136	8.81517e-14	1.05782e-11	1.0186e-11
Stool	M00270	PTS_system__trehalose-specific_II_component	GH20	-0.583645	136	8.83738e-14	1.06049e-11	1.0206e-11
Tongue dorsum	M00168	CAM__Crassulacean_acid_metabolism___dark	PL8	-0.607959	123	8.83738e-14	1.06049e-11	1.02003e-11
Supragingival plaque	M00278	PTS_system__sorbose-specific_II_component	GH106	0.624447	115	8.84848e-14	1.06182e-11	1.02074e-11
Anterior nares	M00201	alpha-Glucoside_transport_system	GH112	0.694266	87	8.87068e-14	1.06448e-11	1.02274e-11
Stool	M00076	Dermatan_sulfate_degradation	PL15	0.583463	136	9.03722e-14	1.08447e-11	1.04136e-11
Stool	M00312	2-oxoisovalerate_ferredoxin_oxidoreductase	GH1	0.583452	136	9.04832e-14	1.0858e-11	1.04206e-11
Stool	M00197	Putative_sugar_transport_system	GH78	-0.583434	136	9.07052e-14	1.08846e-11	1.04403e-11
Supragingival plaque	M00360	Aminoacyl-tRNA_biosynthesis__prokaryotes	GH27	0.624039	115	9.28146e-14	1.11378e-11	1.06772e-11
Stool	M00201	alpha-Glucoside_transport_system	PL11	-0.583217	136	9.31477e-14	1.11777e-11	1.07096e-11
Stool	M00016	Lysine_biosynthesis__aspartate_=__lysine	PL11	-0.58319	136	9.33698e-14	1.12044e-11	1.07291e-11
Supragingival plaque	M00120	Coenzyme_A_biosynthesis__pantothenate_=__CoA	GH5	-0.623993	115	9.33698e-14	1.12044e-11	1.07232e-11
Stool	M00199	Lactose_L-arabinose_transport_system	GH39	0.583152	136	9.38138e-14	1.12577e-11	1.07682e-11
Stool	M00124	Pyridoxal_biosynthesis__erythrose-4P_=__pyridoxal-5P	GH43	0.58313	136	9.40359e-14	1.12843e-11	1.07877e-11
Stool	M00360	Aminoacyl-tRNA_biosynthesis__prokaryotes	GH20	-0.583119	136	9.41469e-14	1.12976e-11	1.07945e-11
Stool	M00052	Pyrimidine_ribonucleotide_biosynthesis__UMP_=__UDP_UTP_CDP_CTP	PL1	0.583088	136	9.4591e-14	1.13509e-11	1.08394e-11
Stool	M00206	Cellobiose_transport_system	GH95	-0.583041	136	9.50351e-14	1.14042e-11	1.08843e-11
Supragingival plaque	M00023	Tryptophan_biosynthesis__chorismate_=__tryptophan	GH53	-0.623776	115	9.57012e-14	1.14841e-11	1.09545e-11
Supragingival plaque	M00133	Polyamine_biosynthesis__arginine_=__agmatine_=__putrescine_=__spermidine	GH51	0.623783	115	9.57012e-14	1.14841e-11	1.09484e-11
Buccal mucosa	M00136	GABA_biosynthesis__prokaryotes__putrescine_=__GABA	GH57	0.637033	109	9.58122e-14	1.14975e-11	1.09551e-11
Stool	M00199	Lactose_L-arabinose_transport_system	GH106	-0.582909	136	9.65894e-14	1.15907e-11	1.10378e-11
Buccal mucosa	M00077	Chondroitin_sulfate_degradation	GH57	0.636943	109	9.68114e-14	1.16174e-11	1.10571e-11
Stool	M00124	Pyridoxal_biosynthesis__erythrose-4P_=__pyridoxal-5P	GH28	0.582889	136	9.68114e-14	1.16174e-11	1.1051e-11
Tongue dorsum	M00201	alpha-Glucoside_transport_system	GH102	-0.607186	123	9.68114e-14	1.16174e-11	1.10449e-11
Stool	M00197	Putative_sugar_transport_system	GH2	-0.582821	136	9.75886e-14	1.17106e-11	1.11275e-11
Tongue dorsum	M00125	Riboflavin_biosynthesis__GTP_=__riboflavin_FMN_FAD	GH68	-0.607108	123	9.76996e-14	1.1724e-11	1.1134e-11
Stool	M00060	Lipopolysaccharide_biosynthesis__KDO2-lipid_A	GH29	0.582727	136	9.86988e-14	1.18439e-11	1.12417e-11
Tongue dorsum	M00348	Glutathione_transport_system	GH26	0.607007	123	9.88098e-14	1.18572e-11	1.12481e-11
Tongue dorsum	M00157	F-type_ATPase__bacteria	GH8	0.606978	123	9.91429e-14	1.18971e-11	1.12798e-11
Tongue dorsum	M00164	ATP_synthase	GH8	0.606978	123	9.91429e-14	1.18971e-11	1.12737e-11
Stool	M00017	Methionine_biosynthesis__apartate_=__homoserine_=__methionine	GH111	0.582633	136	9.9809e-14	1.19771e-11	1.13432e-11
Tongue dorsum	M00049	Adenine_nucleotide_biosynthesis__IMP_=__ADP_dADP_ATP_dATP	GH53	0.606855	123	1.00586e-13	1.20703e-11	1.14252e-11
Stool	M00006	Pentose_phosphate_pathway__oxidative_phase__glucose_6P_=__ribulose_5P	GH42	0.582566	136	1.00697e-13	1.20837e-11	1.14315e-11
Stool	M00193	Putative_spermidine_putrescine_transport_system	GH50	-0.582473	136	1.01807e-13	1.22169e-11	1.15512e-11
Stool	M00193	Putative_spermidine_putrescine_transport_system	GH31	-0.582435	136	1.02252e-13	1.22702e-11	1.15954e-11
Stool	M00237	Branched-chain_amino_acid_transport_system	GH113	0.582422	136	1.02363e-13	1.22835e-11	1.16016e-11
Tongue dorsum	M00125	Riboflavin_biosynthesis__GTP_=__riboflavin_FMN_FAD	GH110	0.606613	123	1.03584e-13	1.24301e-11	1.17336e-11
Stool	M00119	Pantothenate_biosynthesis__valine_L-aspartate_=__pantothenate	GH111	-0.582214	136	1.05027e-13	1.26033e-11	1.18905e-11
Anterior nares	M00201	alpha-Glucoside_transport_system	GH20	0.692792	87	1.05138e-13	1.26166e-11	1.18966e-11
Stool	M00199	Lactose_L-arabinose_transport_system	GH43	-0.58207	136	1.06803e-13	1.28164e-11	1.20784e-11
Stool	M00060	Lipopolysaccharide_biosynthesis__KDO2-lipid_A	GH10	0.581992	136	1.07803e-13	1.29363e-11	1.21848e-11
Stool	M00123	Biotin_biosynthesis__pimeloyl-CoA_=__biotin	GH50	0.581989	136	1.07803e-13	1.29363e-11	1.21782e-11
Tongue dorsum	M00126	Tetrahydrofolate_biosynthesis__GTP_=__THF	GH24	0.606245	123	1.08136e-13	1.29763e-11	1.22091e-11
Stool	M00237	Branched-chain_amino_acid_transport_system	GH66	-0.581953	136	1.08358e-13	1.30029e-11	1.22275e-11
Stool	M00324	Dipeptide_transport_system	GH95	-0.581911	136	1.08913e-13	1.30695e-11	1.22834e-11
Supragingival plaque	M00348	Glutathione_transport_system	GH116	0.62244	115	1.1191e-13	1.34293e-11	1.26146e-11
Tongue dorsum	M00287	PTS_system__galactosamine-specific_II_component	GH53	0.60595	123	1.1191e-13	1.34293e-11	1.26077e-11
Stool	M00126	Tetrahydrofolate_biosynthesis__GTP_=__THF	GH59	-0.581593	136	1.13132e-13	1.35758e-11	1.27385e-11
Stool	M00178	Ribosome__bacteria	GH106	-0.581547	136	1.13687e-13	1.36424e-11	1.2794e-11
Buccal mucosa	M00334	Type_VI_secretion_system	GH66	0.635475	109	1.14797e-13	1.37756e-11	1.29119e-11
Stool	M00123	Biotin_biosynthesis__pimeloyl-CoA_=__biotin	GH113	-0.581386	136	1.15907e-13	1.39089e-11	1.30297e-11
Stool	M00060	Lipopolysaccharide_biosynthesis__KDO2-lipid_A	GH51	0.581378	136	1.16018e-13	1.39222e-11	1.30351e-11
Stool	M00087	beta-Oxidation	GH78	-0.581374	136	1.16018e-13	1.39222e-11	1.3028e-11
Tongue dorsum	M00287	PTS_system__galactosamine-specific_II_component	GH105	0.605629	123	1.1624e-13	1.39488e-11	1.30458e-11
Stool	M00324	Dipeptide_transport_system	GH115	-0.581317	136	1.16906e-13	1.40288e-11	1.31135e-11
Stool	M00206	Cellobiose_transport_system	PL11	-0.581231	136	1.18128e-13	1.41753e-11	1.32434e-11
Supragingival plaque	M00061	Uronic_acid_metabolism	GH26	0.621976	115	1.18128e-13	1.41753e-11	1.32362e-11
Stool	M00198	sn-Glycerol_3-phosphate_transport_system	GH15	-0.581161	136	1.19016e-13	1.42819e-11	1.33285e-11
Stool	M00016	Lysine_biosynthesis__aspartate_=__lysine	GH88	-0.581143	136	1.19349e-13	1.43219e-11	1.33586e-11
Stool	M00018	Threonine_biosynthesis__apartate_=__homoserine_=__threonine	GH16	-0.581107	136	1.19793e-13	1.43752e-11	1.3401e-11
Stool	M00008	Entner-Doudoroff_pathway__glucose-6P_=__glyceraldehyde-3P___pyruvate	GH31	0.581078	136	1.20237e-13	1.44285e-11	1.34434e-11
Stool	M00061	Uronic_acid_metabolism	GH31	0.581074	136	1.20348e-13	1.44418e-11	1.34486e-11
Stool	M00362	Nucleotide_sugar_biosynthesis__prokaryotes	GH112	0.581046	136	1.20681e-13	1.44817e-11	1.34785e-11
Stool	M00016	Lysine_biosynthesis__aspartate_=__lysine	GH2	-0.580984	136	1.21569e-13	1.45883e-11	1.35704e-11
Supragingival plaque	M00077	Chondroitin_sulfate_degradation	GH53	0.62171	115	1.21791e-13	1.4615e-11	1.35878e-11
Buccal mucosa	M00077	Chondroitin_sulfate_degradation	GH97	0.634876	109	1.23013e-13	1.47615e-11	1.37168e-11
Tongue dorsum	M00239	Peptides_nickel_transport_system	GH8	0.605133	123	1.23235e-13	1.47882e-11	1.37341e-11
Stool	M00239	Peptides_nickel_transport_system	GH15	-0.580847	136	1.23568e-13	1.48281e-11	1.37638e-11
Stool	M00015	Proline_biosynthesis__glutamate_=__proline	GH36	0.580766	136	1.24789e-13	1.49747e-11	1.38924e-11
Supragingival plaque	M00202	Oligogalacturonide_transport_system	GH115	0.621484	115	1.25011e-13	1.50013e-11	1.39096e-11
Stool	M00326	RTX_toxin_transport_system	GH94	0.580736	136	1.25233e-13	1.5028e-11	1.39268e-11
Supragingival plaque	M00004	Pentose_phosphate_pathway__Pentose_phosphate_cycle_	GH73	-0.621378	115	1.26565e-13	1.51879e-11	1.40674e-11
Supragingival plaque	M00178	Ribosome__bacteria	GH103	-0.621305	115	1.27676e-13	1.53211e-11	1.41833e-11
Stool	M00119	Pantothenate_biosynthesis__valine_L-aspartate_=__pantothenate	GH28	0.580364	136	1.30895e-13	1.57074e-11	1.45331e-11
Tongue dorsum	M00141	C1-unit_interconversion__eukaryotes	GH53	0.604561	123	1.31672e-13	1.58007e-11	1.46115e-11
Supragingival plaque	M00304	PTS_system__fructose-specific_II_component	GH5	-0.621009	115	1.32117e-13	1.5854e-11	1.4653e-11
Supragingival plaque	M00120	Coenzyme_A_biosynthesis__pantothenate_=__CoA	GH92	-0.620973	115	1.32672e-13	1.59206e-11	1.47067e-11
Supragingival plaque	M00202	Oligogalacturonide_transport_system	GH27	0.620938	115	1.33227e-13	1.59872e-11	1.47603e-11
Stool	M00183	RNA_polymerase__bacteria	GH109	-0.580179	136	1.33782e-13	1.60538e-11	1.48139e-11
Supragingival plaque	M00202	Oligogalacturonide_transport_system	GH4	0.620891	115	1.33893e-13	1.60671e-11	1.48183e-11
Stool	M00026	Histidine_biosynthesis__PRPP_=__histidine	GH59	0.580168	136	1.34004e-13	1.60805e-11	1.48226e-11
Anterior nares	M00206	Cellobiose_transport_system	GH5	0.690593	87	1.35114e-13	1.62137e-11	1.49374e-11
Anterior nares	M00060	Lipopolysaccharide_biosynthesis__KDO2-lipid_A	GH103	0.690587	87	1.35225e-13	1.6227e-11	1.49417e-11
Stool	M00326	RTX_toxin_transport_system	PL11	-0.580076	136	1.35447e-13	1.62537e-11	1.49583e-11
Stool	M00361	Nucleotide_sugar_biosynthesis__eukaryotes	PL15	-0.580068	136	1.35558e-13	1.6267e-11	1.49625e-11
Stool	M00326	RTX_toxin_transport_system	GH105	-0.57998	136	1.37002e-13	1.64402e-11	1.51139e-11
Supragingival plaque	M00159	V-type_ATPase__prokaryotes	GH114	0.62062	115	1.38223e-13	1.65867e-11	1.52404e-11
Stool	M00017	Methionine_biosynthesis__apartate_=__homoserine_=__methionine	GH114	0.579896	136	1.38445e-13	1.66134e-11	1.52568e-11
Stool	M00018	Threonine_biosynthesis__apartate_=__homoserine_=__threonine	PL15	-0.579851	136	1.39111e-13	1.66933e-11	1.5322e-11
Supragingival plaque	M00079	Keratan_sulfate_degradation	GH114	0.620532	115	1.39555e-13	1.67466e-11	1.53628e-11
Stool	M00276	PTS_system__mannose-specific_II_component	GH115	-0.579799	136	1.39999e-13	1.67999e-11	1.54035e-11
Stool	M00360	Aminoacyl-tRNA_biosynthesis__prokaryotes	GH16	-0.57978	136	1.40332e-13	1.68399e-11	1.54319e-11
Supragingival plaque	M00220	Rhamnose_transport_system	GH88	0.620484	115	1.40332e-13	1.68399e-11	1.54237e-11
Stool	M00202	Oligogalacturonide_transport_system	GH59	0.579719	136	1.41331e-13	1.69598e-11	1.55253e-11
Stool	M00126	Tetrahydrofolate_biosynthesis__GTP_=__THF	GH27	0.579685	136	1.41887e-13	1.70264e-11	1.55781e-11
Tongue dorsum	M00023	Tryptophan_biosynthesis__chorismate_=__tryptophan	GH68	0.603879	123	1.42664e-13	1.71196e-11	1.56551e-11
Stool	M00360	Aminoacyl-tRNA_biosynthesis__prokaryotes	GH106	-0.579626	136	1.42886e-13	1.71463e-11	1.56711e-11
Stool	M00026	Histidine_biosynthesis__PRPP_=__histidine	GH114	0.579576	136	1.43774e-13	1.72529e-11	1.57602e-11
Supragingival plaque	M00046	beta-Alanine_biosynthesis__cytosine___uracil_=__beta-alanine	GH27	0.620092	115	1.46883e-13	1.76259e-11	1.60925e-11
Stool	M00237	Branched-chain_amino_acid_transport_system	PL13	-0.579355	136	1.47549e-13	1.77058e-11	1.61569e-11
Tongue dorsum	M00144	Complex_I__NADH_dehydrogenase___NADH_dehydrogenase_I	GH35	-0.603587	123	1.47549e-13	1.77058e-11	1.61483e-11
Supragingival plaque	M00222	Phosphate_transport_system	GH30	-0.620012	115	1.48215e-13	1.77858e-11	1.62127e-11
Tongue dorsum	M00141	C1-unit_interconversion__eukaryotes	PL8	0.603519	123	1.4877e-13	1.78524e-11	1.62648e-11
Stool	M00016	Lysine_biosynthesis__aspartate_=__lysine	GH92	-0.579271	136	1.48992e-13	1.7879e-11	1.62805e-11
Buccal mucosa	M00077	Chondroitin_sulfate_degradation	GH105	0.633188	109	1.49325e-13	1.7919e-11	1.63082e-11
Stool	M00270	PTS_system__trehalose-specific_II_component	GH94	0.579157	136	1.51101e-13	1.81322e-11	1.64935e-11
Stool	M00019	Leucine_biosynthesis__pyruvate_=__2-oxoisovalerate_=__leucine	GH23	0.579044	136	1.531e-13	1.8372e-11	1.67029e-11
Stool	M00172	C4-dicarboxylic_acid_cycle__NADP__-malic_enzyme_type	GH4	0.579026	136	1.53433e-13	1.84119e-11	1.67304e-11
Stool	M00199	Lactose_L-arabinose_transport_system	GH115	-0.578905	136	1.55653e-13	1.86784e-11	1.69636e-11
Buccal mucosa	M00079	Keratan_sulfate_degradation	GH97	0.63252	109	1.61204e-13	1.93445e-11	1.75593e-11
Stool	M00026	Histidine_biosynthesis__PRPP_=__histidine	GH28	-0.578563	136	1.62093e-13	1.94511e-11	1.76468e-11
Supragingival plaque	M00045	Histidine_degradation__histidine_=__N-formiminoglutamate_=__glutamate	GH63	0.61921	115	1.62537e-13	1.95044e-11	1.76859e-11
Tongue dorsum	M00006	Pentose_phosphate_pathway__oxidative_phase__glucose_6P_=__ribulose_5P	GH76	0.602733	123	1.62981e-13	1.95577e-11	1.77249e-11
Tongue dorsum	M00136	GABA_biosynthesis__prokaryotes__putrescine_=__GABA	GH5	0.60263	123	1.64979e-13	1.97975e-11	1.79327e-11
Stool	M00026	Histidine_biosynthesis__PRPP_=__histidine	GH106	-0.578359	136	1.65978e-13	1.99174e-11	1.80319e-11
Supragingival plaque	M00064	ADP-L-glycero-D-manno-heptose_biosynthesis	GH103	0.618982	115	1.66867e-13	2.0024e-11	1.81189e-11
Tongue dorsum	M00304	PTS_system__fructose-specific_II_component	GH57	-0.602495	123	1.67533e-13	2.01039e-11	1.81817e-11
Stool	M00193	Putative_spermidine_putrescine_transport_system	GH27	-0.578277	136	1.67644e-13	2.01172e-11	1.81842e-11
Stool	M00144	Complex_I__NADH_dehydrogenase___NADH_dehydrogenase_I	GH33	0.578193	136	1.69309e-13	2.03171e-11	1.83552e-11
Stool	M00026	Histidine_biosynthesis__PRPP_=__histidine	GH35	-0.57818	136	1.69531e-13	2.03437e-11	1.83697e-11
Stool	M00200	Sorbitol_mannitol_transport_system	GH115	-0.578171	136	1.69753e-13	2.03704e-11	1.83841e-11
Tongue dorsum	M00064	ADP-L-glycero-D-manno-heptose_biosynthesis	GH1	-0.602313	123	1.71085e-13	2.05302e-11	1.85187e-11
Tongue dorsum	M00087	beta-Oxidation	GH26	0.602292	123	1.71529e-13	2.05835e-11	1.8557e-11
Supragingival plaque	M00172	C4-dicarboxylic_acid_cycle__NADP__-malic_enzyme_type	GH106	0.618718	115	1.72085e-13	2.06501e-11	1.86075e-11
Supragingival plaque	M00307	Pyruvate_oxidation__pyruvate_=__acetyl-CoA	GH4	-0.618667	115	1.73084e-13	2.07701e-11	1.87057e-11
Stool	M00028	Ornithine_biosynthesis__glutamate_=__ornithine	GH4	0.577998	136	1.73306e-13	2.07967e-11	1.87199e-11
Stool	M00119	Pantothenate_biosynthesis__valine_L-aspartate_=__pantothenate	PL13	0.577994	136	1.73306e-13	2.07967e-11	1.87102e-11
Stool	M00237	Branched-chain_amino_acid_transport_system	PL15	-0.577979	136	1.73639e-13	2.08367e-11	1.87364e-11
Stool	M00019	Leucine_biosynthesis__pyruvate_=__2-oxoisovalerate_=__leucine	GH2	0.577954	136	1.74194e-13	2.09033e-11	1.87865e-11
Stool	M00061	Uronic_acid_metabolism	GH112	-0.577877	136	1.75748e-13	2.10898e-11	1.89442e-11
Supragingival plaque	M00083	Fatty_acid_biosynthesis__elongation	GH68	-0.618522	115	1.7597e-13	2.11164e-11	1.89582e-11
Supragingival plaque	M00124	Pyridoxal_biosynthesis__erythrose-4P_=__pyridoxal-5P	GH114	0.618496	115	1.76525e-13	2.11831e-11	1.90082e-11
Tongue dorsum	M00006	Pentose_phosphate_pathway__oxidative_phase__glucose_6P_=__ribulose_5P	GH57	-0.602046	123	1.76525e-13	2.11831e-11	1.89983e-11
Stool	M00123	Biotin_biosynthesis__pimeloyl-CoA_=__biotin	GH66	0.57778	136	1.77747e-13	2.13296e-11	1.91199e-11
Stool	M00204	Trehalose_maltose_transport_system	GH111	0.577764	136	1.7808e-13	2.13696e-11	1.91457e-11
Stool	M00123	Biotin_biosynthesis__pimeloyl-CoA_=__biotin	GH42	0.577715	136	1.7919e-13	2.15028e-11	1.92551e-11
Stool	M00326	RTX_toxin_transport_system	GH20	-0.577661	136	1.803e-13	2.1636e-11	1.93643e-11
Stool	M00194	Maltose_maltodextrin_transport_system	GH97	-0.577595	136	1.81744e-13	2.18092e-11	1.95093e-11
Anterior nares	M00206	Cellobiose_transport_system	GH85	0.68784	87	1.84408e-13	2.2129e-11	1.9785e-11
Stool	M00229	Arginine_transport_system	GH70	0.577454	136	1.84741e-13	2.21689e-11	1.98104e-11
Tongue dorsum	M00202	Oligogalacturonide_transport_system	GH114	0.601635	123	1.85074e-13	2.22089e-11	1.98359e-11
Stool	M00076	Dermatan_sulfate_degradation	GH105	0.577425	136	1.85407e-13	2.22489e-11	1.98613e-11
Stool	M00359	Aminoacyl-tRNA_biosynthesis__eukaryotes	GH76	-0.577394	136	1.86073e-13	2.23288e-11	1.99223e-11
Supragingival plaque	M00276	PTS_system__mannose-specific_II_component	GH18	-0.61803	115	1.86184e-13	2.23421e-11	1.99239e-11
Stool	M00360	Aminoacyl-tRNA_biosynthesis__prokaryotes	GH88	-0.577362	136	1.8674e-13	2.24087e-11	1.99731e-11
Stool	M00326	RTX_toxin_transport_system	GH88	-0.577274	136	1.88738e-13	2.26485e-11	2.01764e-11
Supragingival plaque	M00045	Histidine_degradation__histidine_=__N-formiminoglutamate_=__glutamate	GH89	0.617878	115	1.89404e-13	2.27285e-11	2.02371e-11
Stool	M00123	Biotin_biosynthesis__pimeloyl-CoA_=__biotin	GH3	0.577234	136	1.89626e-13	2.27551e-11	2.02504e-11
Buccal mucosa	M00172	C4-dicarboxylic_acid_cycle__NADP__-malic_enzyme_type	GH65	0.630949	109	1.92846e-13	2.31415e-11	2.05836e-11
Stool	M00079	Keratan_sulfate_degradation	GH59	-0.577089	136	1.92846e-13	2.31415e-11	2.0573e-11
Buccal mucosa	M00019	Leucine_biosynthesis__pyruvate_=__2-oxoisovalerate_=__leucine	GH102	0.630939	109	1.92957e-13	2.31548e-11	2.05743e-11
Stool	M00144	Complex_I__NADH_dehydrogenase___NADH_dehydrogenase_I	PL13	0.577072	136	1.93179e-13	2.31815e-11	2.05873e-11
Stool	M00127	Thiamine_biosynthesis__AIR_=__thiamine-P_thiamine-2P	GH35	-0.576943	136	1.96176e-13	2.35412e-11	2.0896e-11
Supragingival plaque	M00012	Glyoxylate_cycle	GH50	0.617575	115	1.96176e-13	2.35412e-11	2.08852e-11
Supragingival plaque	M00036	Leucine_degradation__leucine_=__acetoacetate___acetyl-CoA	GH67	0.617351	115	2.01172e-13	2.41407e-11	2.14061e-11
Tongue dorsum	M00232	General_L-amino_acid_transport_system	GH49	0.600845	123	2.02838e-13	2.43405e-11	2.15723e-11
Stool	M00202	Oligogalacturonide_transport_system	GH30	-0.576633	136	2.03504e-13	2.44205e-11	2.1632e-11
Stool	M00019	Leucine_biosynthesis__pyruvate_=__2-oxoisovalerate_=__leucine	PL10	0.576456	136	2.07723e-13	2.49267e-11	2.20692e-11
Stool	M00004	Pentose_phosphate_pathway__Pentose_phosphate_cycle_	GH76	0.576446	136	2.07945e-13	2.49534e-11	2.20814e-11
Stool	M00202	Oligogalacturonide_transport_system	GH29	-0.576405	136	2.08944e-13	2.50733e-11	2.21761e-11
Supragingival plaque	M00123	Biotin_biosynthesis__pimeloyl-CoA_=__biotin	GH102	0.616998	115	2.09499e-13	2.51399e-11	2.22236e-11
Stool	M00194	Maltose_maltodextrin_transport_system	GH20	-0.576351	136	2.10276e-13	2.52331e-11	2.22946e-11
Tongue dorsum	M00010	Citrate_cycle__first_carbon_oxidation	GH85	-0.600394	123	2.13607e-13	2.56328e-11	2.26362e-11
Stool	M00115	NAD_biosynthesis__aspartate_=__NAD	GH111	-0.576149	136	2.15383e-13	2.5846e-11	2.28128e-11
Stool	M00026	Histidine_biosynthesis__PRPP_=__histidine	PL11	-0.576093	136	2.16716e-13	2.60059e-11	2.29422e-11
Stool	M00229	Arginine_transport_system	GH4	0.576074	136	2.17271e-13	2.60725e-11	2.29892e-11
Stool	M00312	2-oxoisovalerate_ferredoxin_oxidoreductase	GH4	0.57606	136	2.17604e-13	2.61124e-11	2.30127e-11
Tongue dorsum	M00336	Twin-arginine_translocation__Tat__system	GH4	-0.600207	123	2.1827e-13	2.61924e-11	2.30713e-11
Supragingival plaque	M00124	Pyridoxal_biosynthesis__erythrose-4P_=__pyridoxal-5P	GH57	0.616534	115	2.20934e-13	2.65121e-11	2.3341e-11
Stool	M00052	Pyrimidine_ribonucleotide_biosynthesis__UMP_=__UDP_UTP_CDP_CTP	GH115	0.575905	136	2.21601e-13	2.65921e-11	2.33995e-11
Tongue dorsum	M00222	Phosphate_transport_system	GH65	-0.600077	123	2.21601e-13	2.65921e-11	2.33876e-11
Stool	M00022	Shikimate_pathway__phosphoenolpyruvate___erythrose-4P_=__chorismate	GH27	-0.57588	136	2.22267e-13	2.6672e-11	2.34459e-11
Stool	M00239	Peptides_nickel_transport_system	GH31	-0.57584	136	2.23266e-13	2.67919e-11	2.35393e-11
Stool	M00220	Rhamnose_transport_system	GH114	0.575829	136	2.23599e-13	2.68319e-11	2.35624e-11
Tongue dorsum	M00050	Guanine_nucleotide_biosynthesis__IMP_=__GDP_dGDP_GTP_dGTP	PL8	0.599965	123	2.24376e-13	2.69251e-11	2.36323e-11
Supragingival plaque	M00124	Pyridoxal_biosynthesis__erythrose-4P_=__pyridoxal-5P	GH26	0.616382	115	2.24709e-13	2.69651e-11	2.36553e-11
Tongue dorsum	M00011	Citrate_cycle__second_carbon_oxidation	GH28	-0.599813	123	2.28373e-13	2.74047e-11	2.40288e-11
Stool	M00324	Dipeptide_transport_system	GH2	-0.575614	136	2.29261e-13	2.75113e-11	2.411e-11
Supragingival plaque	M00061	Uronic_acid_metabolism	GH116	0.61616	115	2.30482e-13	2.76579e-11	2.42261e-11
Stool	M00022	Shikimate_pathway__phosphoenolpyruvate___erythrose-4P_=__chorismate	PL15	-0.575552	136	2.30926e-13	2.77112e-11	2.42605e-11
Supragingival plaque	M00036	Leucine_degradation__leucine_=__acetoacetate___acetyl-CoA	GH78	0.616108	115	2.31815e-13	2.78177e-11	2.43415e-11
Stool	M00219	AI-2_transport_system	GH111	0.575468	136	2.33258e-13	2.79909e-11	2.44806e-11
Tongue dorsum	M00060	Lipopolysaccharide_biosynthesis__KDO2-lipid_A	GH102	0.59958	123	2.3459e-13	2.81508e-11	2.46079e-11
Stool	M00022	Shikimate_pathway__phosphoenolpyruvate___erythrose-4P_=__chorismate	GH18	-0.575394	136	2.35256e-13	2.82308e-11	2.46653e-11
Stool	M00200	Sorbitol_mannitol_transport_system	GH39	0.575378	136	2.357e-13	2.8284e-11	2.46994e-11
Stool	M00019	Leucine_biosynthesis__pyruvate_=__2-oxoisovalerate_=__leucine	GH43	0.575348	136	2.36478e-13	2.83773e-11	2.47683e-11
Stool	M00126	Tetrahydrofolate_biosynthesis__GTP_=__THF	GH16	0.57532	136	2.37255e-13	2.84706e-11	2.48372e-11
Stool	M00239	Peptides_nickel_transport_system	GH109	-0.575313	136	2.37477e-13	2.84972e-11	2.48478e-11
Stool	M00098	Acylglycerol_degradation	GH51	-0.57524	136	2.39475e-13	2.8737e-11	2.50442e-11
Buccal mucosa	M00136	GABA_biosynthesis__prokaryotes__putrescine_=__GABA	GH109	0.629031	109	2.39586e-13	2.87503e-11	2.50432e-11
Stool	M00199	Lactose_L-arabinose_transport_system	GH105	-0.575155	136	2.41918e-13	2.90301e-11	2.52742e-11
Stool	M00201	alpha-Glucoside_transport_system	GH89	-0.575151	136	2.42029e-13	2.90434e-11	2.52731e-11
Supragingival plaque	M00036	Leucine_degradation__leucine_=__acetoacetate___acetyl-CoA	GH53	0.615725	115	2.4214e-13	2.90568e-11	2.52719e-11
Supragingival plaque	M00276	PTS_system__mannose-specific_II_component	GH6	-0.6157	115	2.42806e-13	2.91367e-11	2.53286e-11
Tongue dorsum	M00017	Methionine_biosynthesis__apartate_=__homoserine_=__methionine	GH70	0.59926	123	2.43361e-13	2.92033e-11	2.53738e-11
Tongue dorsum	M00201	alpha-Glucoside_transport_system	GH103	-0.599206	123	2.44804e-13	2.93765e-11	2.55114e-11
Stool	M00270	PTS_system__trehalose-specific_II_component	GH89	-0.575028	136	2.4547e-13	2.94564e-11	2.55679e-11
Stool	M00125	Riboflavin_biosynthesis__GTP_=__riboflavin_FMN_FAD	GH97	0.575019	136	2.45803e-13	2.94964e-11	2.55897e-11
Supragingival plaque	M00126	Tetrahydrofolate_biosynthesis__GTP_=__THF	GH78	0.61547	115	2.49245e-13	2.99094e-11	2.5935e-11
Stool	M00194	Maltose_maltodextrin_transport_system	GH95	-0.574857	136	2.50466e-13	3.0056e-11	2.6049e-11
Supragingival plaque	M00336	Twin-arginine_translocation__Tat__system	GH116	-0.61541	115	2.51021e-13	3.01226e-11	2.60936e-11
Buccal mucosa	M00079	Keratan_sulfate_degradation	GH109	0.628518	109	2.53908e-13	3.0469e-11	2.63804e-11
Stool	M00018	Threonine_biosynthesis__apartate_=__homoserine_=__threonine	GH109	-0.574707	136	2.54907e-13	3.05889e-11	2.6471e-11
Supragingival plaque	M00006	Pentose_phosphate_pathway__oxidative_phase__glucose_6P_=__ribulose_5P	GH73	-0.615187	115	2.57461e-13	3.08953e-11	2.67228e-11
Stool	M00052	Pyrimidine_ribonucleotide_biosynthesis__UMP_=__UDP_UTP_CDP_CTP	GH106	0.574606	136	2.57905e-13	3.09486e-11	2.67554e-11
Stool	M00052	Pyrimidine_ribonucleotide_biosynthesis__UMP_=__UDP_UTP_CDP_CTP	GH28	0.574488	136	2.61458e-13	3.13749e-11	2.71105e-11
Stool	M00232	General_L-amino_acid_transport_system	GH103	0.574296	136	2.67453e-13	3.20943e-11	2.77182e-11
Tongue dorsum	M00011	Citrate_cycle__second_carbon_oxidation	GH105	-0.598428	123	2.67675e-13	3.2121e-11	2.77273e-11
[truncated: 31,554 more rows]
